# Supplementary material for: Single-nucleus chromatin accessibility reveals intratumoral epigenetic heterogeneity in IDH1 mutant gliomas
Source: Acta Neuropathol Commun. 2019 Dec 5;7:201. doi: 10.1186/s40478-019-0851-y (PMC6896263; doi:10.1186/s40478-019-0851-y)
Supplement: Supplementary file 6 — Additional file 6: Table S5. Differentially methylated probes between IDH-codel and IDH-intact samples (q-value < 0.001 and absolute delta ß-value > 0.1). [file 40478_2019_851_MOESM6_ESM.xlsx]

## Sheet: DMP_sig_dB0.1_qval0.001
Table S5 - Differentially methylated probes between IDH-codel and IDH-intact samples (q-value < 0.001 and absolute delta b-value > 0.1)
Probe	Median b-value, IDH-codel	Median b-value, IDH-intact	pval	qval	chr	pos	strand	Islands_Name	Relation_to_Island	Forward_Sequence	SourceSeq	UCSC_RefGene_Name	UCSC_RefGene_Accession	UCSC_RefGene_Group	Phantom4_Enhancers	Phantom5_Enhancers	DMR	450k_Enhancer	HMM_Island	Regulatory_Feature_Name	Regulatory_Feature_Group	GencodeBasicV12_NAME	GencodeBasicV12_Accession	GencodeBasicV12_Group	GencodeCompV12_NAME	GencodeCompV12_Accession	GencodeCompV12_Group	Methyl27_Loci	Methyl450_Loci
cg00002934	0.492586	0.168173	1.34815e-05	0.000592693	chr7	6570991	-	chr7:6570453-6571095	Island	TGCTGGGACCCTTTTGGTCGCTCTGGGGTGCAGCGGAAACTGGCGGCGGTTTGAAGCCGC[CG]CGCTCACTCCCCTTGGCTCTCTCCGTTATTCCCTTCCCAGGATCCTCGCCTGCGTCCTCT	CGGCGGCTTCAAACCGCCGCCAGTTTCCGCTGCACCCCAGAGCGACCAAA	GRID2IP	NM_001145118	Body			DMR	NA	7:6536979-6537671	7:6570204-6571315	Unclassified	GRID2IP	ENST00000435185.1	TSS200	GRID2IP	ENST00000435185.1	TSS200	NA	NA
cg00003187	0.676506	0.801007	2.65999e-07	3.03623e-05	chr1	8739981	+		OpenSea	GGTGTGATCTGCCACTCAAGTTAATTATCACAGGCTGCTTATACACAGGAAGAGAGGAAG[CG]GGAAAGAACTCATGACCTTGCACAGGGATGTTTTATAAAATTCTCTAAAATTTAAACTAC	CGGGAAAGAACTCATGACCTTGCACAGGGATGTTTTATAAAATTCTCTAA	RERE;RERE	NM_012102;NM_001042681	5'UTR;5'UTR				TRUE				RERE;RERE;RERE	ENST00000480342.1;ENST00000337907.3;ENST00000400908.2	3'UTR;5'UTR;5'UTR	RERE;RERE;RERE;RERE	ENST00000468247.1;ENST00000480342.1;ENST00000337907.3;ENST00000400908.2	3'UTR;3'UTR;5'UTR;5'UTR	NA	TRUE
cg00003298	0.829413	0.206781	1.92612e-11	3.01224e-08	chr12	113901210	-	chr12:113900750-113906442	Island	TCGGTGTGTCCGGGTGCGAGATCATGTCGGTGAACCTGGGGTTGTCCGCGGCGTGCGGGC[CG]GCGAGCGGCGGTTCCAGCGCTCCCAGCGGCGTCGAGCCGGGGCCAGAGGCCGCCAGGAAG	CGGCCCGCACGCCGCGGACAACCCCAGGTTCACCGACATGATCTCGCACC	LHX5	NM_022363	Body			DMR	TRUE	12:112384990-112386862	12:113900820-113901612	Unclassified_Cell_type_specific							NA	TRUE
cg00006735	0.858888	0.706313	1.41919e-05	0.000615845	chr9	138306333	-	chr9:138304468-138304684	S_Shore	CCTCATAGGGACGGGGCTTCGGCCTGGAGGCCTGAAAACGTCCTGAAACTAGCTGGAGGT[CG]TGGTTACGCAACACCATGAATGTCTAAACACCCCCAAGCTGTGCACCTGAAAATGATTCA	CGACCTCCAGCTAGTTTCAGGACGTTTTCAGGCCTCCAGGCCGAAGCCCC							NA										NA	NA
cg00012992	0.219394	0.0696617	3.19501e-06	0.000195253	chr14	61788345	-	chr14:61787880-61789467	Island	CGCGGGGGTTCTGTGAACTTGGAACCTGGCGGTGCGAGGTTCTCGCCGGGGATGCGGCGG[CG]GCAGCTGCTTCCTGGTTTGAAGCTCGCCGAGTGGGGGAGAGCGTGAGCCTTCGGAGGCGG	CGCCGCCGCATCCCCGGCGAGAACCTCGCACCGCCAGGTTCCAAGTTCAC	PRKCH	NM_006255	TSS200	high-CpG:60857987-60858292			NA	14:60857561-60859257	14:61787646-61789040	Promoter_Associated	PRKCH;PRKCH;RP11-902B17.1	ENST00000555082.1;ENST00000332981.5;ENST00000500036.2	TSS1500;TSS200;3'UTR	PRKCH;PRKCH;PRKCH;RP11-902B17.1;RP11-902B17.1;PRKCH;PRKCH;PRKCH;PRKCH;PRKCH	ENST00000555082.1;ENST00000552875.2;ENST00000332981.5;ENST00000554086.1;ENST00000500036.2;ENST00000557294.1;ENST00000555185.1;ENST00000556778.1;ENST00000555542.1;ENST00000555906.1	TSS1500;TSS1500;TSS200;3'UTR;3'UTR;5'UTR;5'UTR;5'UTR;5'UTR;5'UTR	NA	TRUE
cg00013349	0.622556	0.763856	9.85409e-07	8.07529e-05	chr1	77049380	-		OpenSea	AGAGTGCCTGCCGCTGTATAATGCCAGGAACTCATCTTTACAGGAACTATGTGCTTAGGA[CG]CTGTGTGATGCAGATATACTAGCTACTCTTTCTTTTTCAGAAATGAGTGTCCCACACCAC	GCTGTATAATGCCAGGAACTCATCTTTACAGGAACTATGTGCTTAGGACG	ST6GALNAC3	NM_152996	Body				TRUE										NA	TRUE
cg00013936	0.20449	0.489809	5.92623e-10	3.77756e-07	chr6	127624025	-		OpenSea	ACATACAGCATTTCCTGTTTAGTCTCATATCAAGCATAAAGCCAATGACTGCTTCCTCTT[CG]CAGAATAAAATGTAATAATAGCAGCATTCTAATGCAATCTGCACTGATGACAGCAGAGGG	TCCTGTTTAGTCTCATATCAAGCATAAAGCCAATGACTGCTTCCTCTTCG	ECHDC1;ECHDC1;ECHDC1;ECHDC1;ECHDC1	NM_001105545;NM_018479;NM_001105544;NM_001002030;NM_001139510	3'UTR;3'UTR;Body;Body;Body				NA		6:127623829-127624300	Unclassified_Cell_type_specific	ECHDC1;ECHDC1;ECHDC1;ECHDC1;RP11-73O6.4	ENST00000368290.4;ENST00000528402.1;ENST00000368291.2;ENST00000368289.2;ENST00000563385.1	3'UTR;3'UTR;3'UTR;3'UTR;5'UTR	ECHDC1;ECHDC1;ECHDC1;ECHDC1;ECHDC1;ECHDC1;ECHDC1;ECHDC1;ECHDC1;RP11-73O6.4	ENST00000368290.4;ENST00000368295.4;ENST00000528402.1;ENST00000479525.2;ENST00000368291.2;ENST00000475319.1;ENST00000368289.2;ENST00000417628.2;ENST00000368292.6;ENST00000563385.1	3'UTR;3'UTR;3'UTR;3'UTR;3'UTR;3'UTR;3'UTR;3'UTR;3'UTR;5'UTR	NA	NA
cg00016841	0.317755	0.0774564	1.05347e-06	8.50327e-05	chr16	31499479	-	chr16:31498650-31500564	Island	CTGTGTGGGTACCTGAAGCTGACGCCCATGTTTCTCATGGTCATGCCAGGCATGATCAGC[CG]CATTCTGTACCCAGGTAACATCCCTGCCCCGCCCCTTTCCTGTGCCAGCAACCGGGCGCC	CGGCTGATCATGCCTGGCATGACCATGAGAAACATGGGCGTCAGCTTCAG	SLC5A2	NM_003041	Body				TRUE	16:31406152-31408065			AC026471.6;SLC5A2;SLC5A2	ENST00000565137.1;ENST00000564197.1;ENST00000330498.3	3'UTR;TSS1500;ExonBnd	AC026471.6;SLC5A2;SLC5A2;SLC5A2;SLC5A2;SLC5A2	ENST00000565137.1;ENST00000567051.1;ENST00000568891.1;ENST00000568188.1;ENST00000568188.1;ENST00000419665.2	3'UTR;TSS1500;TSS200;1stExon;5'UTR;ExonBnd	NA	TRUE
cg00018572	0.319151	0.620399	4.27116e-06	0.000244948	chr13	77386497	+		OpenSea	GCAGGGAGTGTGTCATGGTGGGGACATTACTGTAGCAGATGGTGGCCATGTGAGCTGTGG[CG]GCAGCCAAGGGCTTGTTCAGAATGGATTCTGTTCTGCTTTTATGGCATCTGTTTCCAATC	CGGCAGCCAAGGGCTTGTTCAGAATGGATTCTGTTCTGCTTTTATGGCAT							NA										NA	NA
cg00019891	0.655071	0.782733	3.381e-08	6.83571e-06	chr1	60336370	-		OpenSea	AAAAGATTTTTCCAGTTATTTTTGACTATGTCCTCTTTCTCCTTAGTTTTGACCCCTCCA[CG]GGTGCAGCTCTGTTTCGTTTACCTAAGCCACTCGTTACTTTTTTCTCTAGATATGGTGGG	CAGTTATTTTTGACTATGTCCTCTTTCTCCTTAGTTTTGACCCCTCCACG	HOOK1	NM_015888	Body				NA				HOOK1	ENST00000465876.1	5'UTR	HOOK1;HOOK1;HOOK1	ENST00000466803.1;ENST00000491135.1;ENST00000465876.1	5'UTR;TSS200;5'UTR	NA	NA
cg00023702	0.701025	0.8067	2.53085e-06	0.000164086	chr1	114496771	+		OpenSea	TAGATGGGACTATAGGTGCATGCCACCTTGCCTAGCTAATTCTTTTATTTTTTGTAGAGT[CG]GGGATCTTGCTATATCAGCCTAGGGTGGTCTCAAACTCCCAGGCTCAAGCTATCCTCCTA	CGGGGATCTTGCTATATCAGCCTAGGGTGGTCTCAAACTCCCAGGCTCAA	HIPK1;HIPK1;HIPK1;HIPK1	NM_198269;NM_198268;NM_152696;NM_181358	Body;Body;Body;5'UTR				NA				HIPK1;HIPK1	ENST00000406344.1;ENST00000369553.1	TSS1500;5'UTR	HIPK1;HIPK1	ENST00000406344.1;ENST00000369553.1	TSS1500;5'UTR	NA	TRUE
cg00024086	0.318421	0.145809	4.39892e-06	0.000250206	chr7	156814491	+	chr7:156810572-156814593	Island	GCTGCCTCGCCCCGCGTTTTCCTAGCGGGGGATGGCGGCTCCCCGTGTCCGCATCGCTGC[CG]GGCCCTGCCACCCCAACCCCGGCCGCAGTGGCTGGAAGCCGTGGCCTTTTCCGGGCTCCG	CGGGCCCTGCCACCCCAACCCCGGCCGCAGTGGCTGGAAGCCGTGGCCTT						DMR	TRUE	7:156506138-156507657									NA	TRUE
cg00025354	0.430554	0.724523	7.41472e-09	2.32114e-06	chr19	38586474	-		OpenSea	GTTTTTCAAGTAGTGCGCGCCGATGAGGTGGTCAGAGCCAAAATGTGACTGTAAGTCACC[CG]TCTCCAGGGAGGAAGAAGGAAGATTTCTGGTCCGTGCTGTCCCTCGTTCCCAGCAGAGGG	CGGGTGACTTACAGTCACATTTTGGCTCTGACCACCTCATCGGCGCGCAC	SIPA1L3	NM_015073	Body				NA		19:38585743-38587236	Unclassified							NA	NA
cg00026401	0.129314	0.463085	6.31321e-08	1.06652e-05	chr6	40445699	-		OpenSea	CAGACAATGCCACAAGATGTTGTTTACATGCACACCGGATGTAACACAGACGCAGCAAAC[CG]TGAATATGGTAAACCTGTTTGTGGCTTCTCCTCCGTGTCATAATTAAAGAGACAGTTGAT	CGGTTTGCTGCGTCTGTGTTACATCCGGTGTGCATGTAAACAACATCTTG	LRFN2	NM_020737	5'UTR		chr6:40445607-40445607		NA				LRFN2	ENST00000338305.6	5'UTR	LRFN2	ENST00000338305.6	5'UTR	NA	NA
cg00031393	0.378106	0.747489	2.19176e-10	1.88731e-07	chr13	52263654	-		OpenSea	GAGGCAAGCAGCTGCTGTGGTTGCACAAACCCCAGTTATCTTTAGTTTTCTTGTTTCCGA[CG]CTTCCATGTAGTATGACATATGCCCATCTTAGAAATGTGACATGGGGTTTCCTTATGGAG	TGCTGTGGTTGCACAAACCCCAGTTATCTTTAGTTTTCTTGTTTCCGACG	WDFY2	NM_052950	Body				NA										NA	NA
cg00037671	0.844851	0.621714	2.65058e-06	0.000169753	chr20	4070556	+		OpenSea	TATTATTTCTCTAGGCTTTTGCAATCAGATGCTGGGTTGGCTGGAAGCTGGCTGGTATAG[CG]TGGCCATGCAGCAGGCTAGTCTAGGCTTAGTCACATAGTGATTGCAGGGTTTCAGGAAAA	CCTGCAATCACTATGTGACTAAGCCTAGACTAGCCTGCTGCATGGCCACG					chr20:4070458-4070458		NA										NA	NA
cg00039998	0.624007	0.440289	1.29293e-05	0.000573456	chr8	133069361	+		OpenSea	TATCTGTGAGGCTGTTGTGAAGACTGAAATGAGTTAATCTTTGTGAGGCACATACAACAG[CG]CCTGACATAGAGAAGTTGCTCAAAAGCATTAAGAATTACAATGATGGCATCTGGCTCGAG	CGCCTGACATAGAGAAGTTGCTCAAAAGCATTAAGAATTACAATGATGGC	OC90	NM_001080399	5'UTR				NA				OC90	ENST00000443356.2	5'UTR	OC90	ENST00000443356.2	5'UTR	NA	NA
cg00040663	0.608293	0.838604	1.46142e-09	7.3079e-07	chr2	162565584	+		OpenSea	GTGCCTGTGTGTGTGTATGTGTTTAAATTTGTGTTTACTTTAGCTTTTTGGGGGAGAGGG[CG]GTAAAGGAAGAGATTCTTTGAATGTGATTAAAAGCAAGGTTTGGGGCACTTCAGATTTTT	TGCCCCAAACCTTGCTTTTAATCACATTCAAAGAATCTCTTCCTTTACCG	SLC4A10;SLC4A10;SLC4A10	NM_001178016;NM_022058;NM_001178015	Body;Body;Body				NA				SLC4A10	ENST00000493021.1	5'UTR	SLC4A10;SLC4A10;SLC4A10;SLC4A10	ENST00000482861.1;ENST00000493021.1;ENST00000461456.1;ENST00000481721.1	5'UTR;5'UTR;5'UTR;5'UTR	NA	NA
cg00043664	0.336993	0.63605	1.42305e-06	0.000106417	chr14	62357432	+		OpenSea	AACTGAGGCCACCAATGACAGAAATTGTGTATGTTAGTAAATTGCGTATGTTAGTAAATA[CG]TTAGTAAATAAGGGTAGCTAAGGAAAACCAAGCCTCTGGGATTGTATTGAACAGTTTCAT	CGTTAGTAAATAAGGGTAGCTAAGGAAAACCAAGCCTCTGGGATTGTATT							NA				CTD-2277K2.1;CTD-2277K2.1	ENST00000554138.1;ENST00000554436.1	5'UTR;5'UTR	CTD-2277K2.1;CTD-2277K2.1	ENST00000554138.1;ENST00000554436.1	5'UTR;5'UTR	NA	NA
cg00046410	0.695121	0.817843	4.48576e-06	0.000253923	chr1	35581062	+		OpenSea	AAAAGTGTTATCTTTTCCTTAAATATCCCTCTAGAGGTATTTTTCCTAAGTGGTATTGTA[CG]GTGTATACTGTTCTTCAGCTTGTCTTCTCTGTGTAACATATTTTTGAGATTGTCCCATGT	CGGTGTATACTGTTCTTCAGCTTGTCTTCTCTGTGTAACATATTTTTGAG	ZMYM1	NM_024772	3'UTR				NA				ZMYM1;ZMYM1;ZMYM1	ENST00000373329.1;ENST00000359858.4;ENST00000373330.1	3'UTR;3'UTR;3'UTR	ZMYM1;ZMYM1;ZMYM1	ENST00000373329.1;ENST00000359858.4;ENST00000373330.1	3'UTR;3'UTR;3'UTR	NA	TRUE
cg00048697	0.23423	0.569711	1.14974e-05	0.000523338	chr4	56459255	-		OpenSea	AACTCCATCTTAAAAAATCCACTGCCTTAAGTGACAGAAGCTCTGGCTTTAGGCCAGGCA[CG]GTGGCACAAGCCTGCAGTCCCAGCTCTTTGGGAGGCTGAGGCAGGTGGATCACTTGAGGT	AAAAATCCACTGCCTTAAGTGACAGAAGCTCTGGCTTTAGGCCAGGCACG	PDCL2	NM_152401	TSS1500				NA				PDCL2	ENST00000295645.4	TSS1500	PDCL2	ENST00000295645.4	TSS1500	NA	TRUE
cg00048759	0.54582	0.414055	1.32101e-05	0.0005836	chr7	99775422	+	chr7:99774733-99775583	Island	CCCAAGCCCACGTGAGAGGGCAGGACGCCTGAGAGCTTGAGGCCACACGAGGCTGTGGAG[CG]GCGTGACTCAAACGTGGCGCGCATCAGCTCGCACACTTCCAAACCTCGCGATAGCTACTG	CGGCGTGACTCAAACGTGGCGCGCATCAGCTCGCACACTTCCAAACCTCG	STAG3;GPC2	NM_012447;NM_152742	TSS200;TSS1500	high-CpG:99613314-99613542			NA	7:99612670-99613854	7:99774737-99775599	Promoter_Associated	STAG3;STAG3;GPC2;STAG3;STAG3;STAG3;STAG3	ENST00000426455.1;ENST00000426455.1;ENST00000292377.2;ENST00000339784.4;ENST00000317296.5;ENST00000394018.2;ENST00000394018.2	1stExon;5'UTR;TSS1500;TSS200;TSS200;1stExon;5'UTR	STAG3;STAG3;GPC2;GPC2;GPC2;STAG3;STAG3;STAG3;STAG3;STAG3;STAG3;STAG3;STAG3;STAG3	ENST00000426455.1;ENST00000426455.1;ENST00000292377.2;ENST00000480087.1;ENST00000471717.1;ENST00000416412.1;ENST00000339784.4;ENST00000317296.5;ENST00000422690.1;ENST00000496157.1;ENST00000439782.1;ENST00000482546.1;ENST00000394018.2;ENST00000394018.2	1stExon;5'UTR;TSS1500;TSS1500;TSS1500;TSS200;TSS200;TSS200;TSS200;TSS200;TSS200;TSS200;1stExon;5'UTR	NA	TRUE
cg00050482	0.772589	0.385395	2.45463e-07	2.86381e-05	chr16	73207213	+		OpenSea	ACCTCACACTGAAGGACTTTTGTACTTTTTCGAGCTGTGTTTTCTGAGATCTTCCGTGGG[CG]ACGGCTTGTCGTTTCCACTTGCAGTTAATTGCATTAGCAGGTATTTTCCCCCCGCCCCTC	GAAAATACCTGCTAATGCAATTAACTGCAAGTGGAAACGACAAGCCGTCG							TRUE	16:71764708-71764843	16:73206087-73208073	Unclassified_Cell_type_specific							NA	TRUE
cg00051068	0.49928	0.130117	3.63668e-06	0.000216157	chr20	10655610	+	chr20:10652573-10655611	Island	AGCTCTCTGGGTGGCAAGAGATGGGCCTGGGAGGGACCGTGTCCCCAGCACCGCCAGCCG[CG]GAACTTGCCTTCTCTGGGGTGGCAGTGGAAACCGATACTGTTTTCCACCTTGAGGCAAGC	GTGGAAAACAGTATCGGTTTCCACTGCCACCCCAGAGAAGGCAAGTTCCG	JAG1	NM_000214	TSS1500				NA	20:10602575-10603723	20:10655276-10656425	Unclassified	JAG1	ENST00000254958.4	TSS1500	JAG1	ENST00000254958.4	TSS1500	NA	TRUE
cg00054710	0.573454	0.787346	2.71283e-07	3.08162e-05	chr11	102700344	-		OpenSea	TTAAATGCTTCTGTCATTATAACCCATCTGCTCACTAACTGGTGAGATTCTGTACTTTAT[CG]TTTATGAACGTTCTTATTTGTGTCAAACCCATATTTCTGTTGGTTTATTGCTGAGTCCAA	GTCATTATAACCCATCTGCTCACTAACTGGTGAGATTCTGTACTTTATCG	WTAPP1	NR_038390	Body				NA				RP11-725K16.4	ENST00000525739.2	5'UTR	RP11-725K16.4;RP11-725K16.4;RP11-725K16.4	ENST00000525739.2;ENST00000544704.1;ENST00000371455.3	5'UTR;5'UTR;5'UTR	NA	NA
cg00055462	0.850851	0.707131	5.09999e-06	0.000279758	chr13	99023894	-		OpenSea	ATCACTCCCCACTTGGTACAAGGCATAGAGAACCTCATGGGGCCGATGTGTTGGGACTCT[CG]CATCTCAAATTCCTGTAGAAGCAAAAATGGACTGACTATTGAGATTTCAGGTGCTGTTCT	TTGGTACAAGGCATAGAGAACCTCATGGGGCCGATGTGTTGGGACTCTCG	FARP1	NM_005766	Body				TRUE				FARP1	ENST00000376584.2	5'UTR	FARP1	ENST00000376584.2	5'UTR	NA	TRUE
cg00056624	0.580069	0.159944	8.75442e-08	1.35305e-05	chr3	37902229	+	chr3:37901938-37904039	Island	GAAGCGCAGGACGCGGGCGTCCAAAGGCCCCGACGCTCCCAGGCTGAGGAGGCACTTTGT[CG]TCTCTCCCACGCTCTGGCCGTCGTCCTAGGCCTGACAGTGGCCAGCTGCCTTGCACAAGC	CGTCTCTCCCACGCTCTGGCCGTCGTCCTAGGCCTGACAGTGGCCAGCTG	CTDSPL;CTDSPL	NM_001008392;NM_005808	TSS1500;TSS1500		chr3:37901883-37901883		NA	3:37876943-37877984			CTDSPL;CTDSPL;AC093415.2	ENST00000443503.2;ENST00000273179.5;ENST00000420870.1	TSS1500;TSS1500;3'UTR	CTDSPL;CTDSPL;CTDSPL;AC093415.2;AC093415.2;AC093415.2;AC093415.2;AC093415.2;AC093415.2;AC093415.2;AC093415.2	ENST00000443503.2;ENST00000273179.5;ENST00000435525.1;ENST00000438136.1;ENST00000450990.1;ENST00000420870.1;ENST00000445429.1;ENST00000457661.1;ENST00000429532.1;ENST00000366441.2;ENST00000430620.1	TSS1500;TSS1500;TSS1500;3'UTR;3'UTR;3'UTR;3'UTR;3'UTR;3'UTR;3'UTR;3'UTR	NA	TRUE
cg00057134	0.52677	0.781343	3.51775e-10	2.63447e-07	chr9	88313473	+		OpenSea	GTGAACACCAGAGGGCAGCTCTACCATTTGACTACATTTTGGCTTTGGAAAATCTGAGGG[CG]GTGGGATGCAAATGAAAGAAAAAAAGCTATATATGAGCAATTTGAGATACTACACTGCAA	ATCTCAAATTGCTCATATATAGCTTTTTTTCTTTCATTTGCATCCCACCG	AGTPBP1;AGTPBP1;AGTPBP1	NM_015239;NM_001286715;NM_001286717	Body;Body;Body				NA		9:88313234-88313552	Unclassified_Cell_type_specific	AGTPBP1	ENST00000337006.4	5'UTR	AGTPBP1	ENST00000337006.4	5'UTR	NA	NA
cg00058515	0.606722	0.791725	2.11921e-05	0.000840764	chr2	80527798	+	chr2:80529677-80530846	N_Shore	GACTTCTCTCTCTCAAAAAAAAGGAAAAATAAAAACAGAAAGATGCAACTCTTTAGTGTC[CG]TTAGAGAGGGAAGAGAAAGACTTAGGGACATGGGCTACATTGGTTCAGCATCTGTCATCC	CTGAACCAATGTAGCCCATGTCCCTAAGTCTTTCTCTTCCCTCTCTAACG	CTNNA2;CTNNA2	NM_004389;NM_001164883	Body;Body				NA							LRRTM1;LRRTM1	ENST00000417012.1;ENST00000433224.1	3'UTR;3'UTR	NA	TRUE
cg00061412	0.53707	0.274039	7.64978e-08	1.22887e-05	chr16	34442168	-	chr16:34441786-34442374	Island	GGACCGCCCCATAGGGACCCCACCCATAGGGACGGGCTGCATTGCGCATGTCTGCAAGGG[CG]TGGCAAGGGGAGGAATGAGCGGGAAGGGGCGGGGCTGAGTGGACTGGCGGGACGAGAAAA	CGCCCTTGCAGACATGCGCAATGCAGCCCGTCCCTATGGGTGGGGTCCCT							NA	16:34299090-34300336			RP11-488I20.8;RP11-488I20.8	ENST00000562572.1;ENST00000569557.2	TSS200;TSS200	RP11-488I20.8;RP11-488I20.8	ENST00000562572.1;ENST00000569557.2	TSS200;TSS200	NA	NA
cg00065261	0.789896	0.541945	5.91607e-09	1.99096e-06	chr7	100546808	+		OpenSea	CCTGCGGGGGACAGGATGGAGCAGGGGCAGACTGAGGGACAGAAGGGGCTTGAAGGAGAG[CG]AGGTGCCACTGTCTCCCCAGCAGGAGGAATTGAAACTCAGGAGAGGCTGCAGGAGTAGGA	AGCCTCTCCTGAGTTTCAATTCCTCCTGCTGGGGAGACAGTGGCACCTCG	MUC3A	NM_005960	TSS1500				NA				MUC3A;AC118759.1	ENST00000483366.1;ENST00000379458.4	TSS1500;TSS1500	MUC3A;AC118759.1	ENST00000483366.1;ENST00000379458.4	TSS1500;TSS1500	NA	NA
cg00067981	0.373617	0.763868	2.29512e-11	3.4216e-08	chr21	27254444	+		OpenSea	ATTTTTTCCTCCCCTGTTGGGTCCATAAAGGACAAACAGAGTCAACGGAAGCCTGTTTTA[CG]TGGAAGTGTTTTGGTAAAATAGATAAAACCACAAGAGTATCATGGAGGGAGATTCAGCAA	CGTGGAAGTGTTTTGGTAAAATAGATAAAACCACAAGAGTATCATGGAGG	APP;APP;APP;APP;APP;APP;APP;APP;APP;APP	NM_001136131;NM_001136016;NM_001204302;NM_001136129;NM_001136130;NM_000484;NM_001204303;NM_001204301;NM_201414;NM_201413	Body;Body;Body;Body;Body;Body;Body;Body;Body;Body				NA		21:27253553-27254871	Gene_Associated				APP	ENST00000464867.1	3'UTR	NA	NA
cg00070042	0.633105	0.400108	9.09208e-06	0.000436686	chr9	133308594	-	chr9:133308593-133309448	Island	TCTCTGGGCTTCAGTTTGTTGAACTCTAAAACGGGCTAGCGTGGGAGCCTGCAGAGAAGG[CG]TGTGGGGCTCTGCGGGAGAAGGACGGGCAGCGCGTGGGCGGAACTGCAGGGGCTGGCAGG	CGCCTTCTCTGCAGGCTCCCACGCTAGCCCGTTTTAGAGTTCAACAAACT							TRUE	9:132298186-132299222	9:133307261-133309191	Unclassified							NA	TRUE
cg00077402	0.152757	0.308899	1.67207e-05	0.000698875	chr20	9597606	+		OpenSea	TCTGGGAAAATCTTTTTGTTTATTCTTTCACTTTGGTTTTTCTGGAGTTGTACAAAAATA[CG]GATAATTGCAAAAAGCTGGACTATTGCAATTGTGTGTGATTCAGACAGAATAAGCCTGAG	CGGATAATTGCAAAAAGCTGGACTATTGCAATTGTGTGTGATTCAGACAG	PAK7;PAK7	NM_177990;NM_020341	Body;Body				NA		20:9597064-9599048	Unclassified							NA	NA
cg00080253	0.465219	0.614996	1.03059e-05	0.000480376	chr1	97630345	+		OpenSea	GATCGCTACAATGAGGATTATAAAACACTGCTCAAATAAATCAGAGATGACACAAACAAA[CG]GGAAAACATTCCATGCTCGTGGACAGGAGGAATCAATGTTATTAAAATGACCAAGTGCCC	CGGGAAAACATTCCATGCTCGTGGACAGGAGGAATCAATGTTATTAAAAT	DPYD;DPYD-AS1	NM_000110;NR_046590	Body;Body				NA				DPYD-AS1	ENST00000422980.1	5'UTR	DPYD-AS1	ENST00000422980.1	5'UTR	NA	NA
cg00081270	0.301342	0.0401069	1.94757e-07	2.43092e-05	chr20	13975880	+	chr20:13975768-13976287	Island	CGCCCTCAAGTCTTCCAAGAGGCCAGCGGTAAGCGCGGTCCACCTCCCTCTCCCACTAGG[CG]TCGGCTTCACGCCGCGCCCACGTCTCGAGGACAGCTCCAGCCCCCTCGCTCCCTGGCTCC	CGAGGGGGCTGGAGCTGTCCTCGAGACGTGGGCGCGGCGTGAAGCCGACG	MACROD2;SEL1L2	NM_080676;NR_073207	TSS1500;Body				TRUE	20:13923709-13925068			SEL1L2;MACROD2;MACROD2;SEL1L2	ENST00000486903.1;ENST00000217246.4;ENST00000310348.4;ENST00000486903.1	1stExon;TSS200;TSS1500;3'UTR	SEL1L2;MACROD2;SEL1L2;MACROD2;MACROD2;MACROD2;MACROD2;MACROD2;MACROD2;MACROD2;SEL1L2	ENST00000486903.1;ENST00000217246.4;ENST00000473203.1;ENST00000477147.1;ENST00000483997.1;ENST00000492055.1;ENST00000462552.1;ENST00000494602.1;ENST00000310348.4;ENST00000490428.1;ENST00000486903.1	1stExon;TSS200;5'UTR;TSS1500;TSS1500;TSS1500;TSS1500;TSS1500;TSS1500;TSS1500;3'UTR	NA	NA
cg00081324	0.343735	0.464876	1.67849e-06	0.000120134	chr17	48201233	+		OpenSea	GGGAGTAGAGGGTAGGGAGGTTGGGGAGTAGGGGCAGAAAAGCCCAGGGAAGGGAGAGCT[CG]TTTCCGTCAGGCCTGGGCTTAAGTCAGGCCTGAGTAGGGACAGACACTGAGATTGAGGCC	AGTGTCTGTCCCTACTCAGGCCTGACTTAAGCCCAGGCCTGACGGAAACG	SAMD14	NM_174920	Body				TRUE				SAMD14	ENST00000503734.1	TSS1500	SAMD14;SAMD14	ENST00000507043.1;ENST00000503734.1	3'UTR;TSS1500	NA	TRUE
cg00081417	0.634402	0.351101	5.09556e-09	1.80528e-06	chr6	140400137	-		OpenSea	CTCTTACTCCCACATTTAGTGCAATCCCTTACAATACTAAGGATAGGTCAGATTTTTGCC[CG]TCCCCTGCATTAAACCTACAAGTAGATCAGATTTCAGGATAAGCAACAAGCAAAAAAGGA	CGGGCAAAAATCTGACCTATCCTTAGTATTGTAAGGGATTGCACTAAATG					chr6:140399868-140399868		TRUE				RP3-332B22.1	ENST00000456896.1	5'UTR	RP3-332B22.1	ENST00000456896.1	5'UTR	NA	TRUE
cg00091513	0.313007	0.625772	1.71679e-06	0.000122203	chr16	56334363	-		OpenSea	TGCAGCTCACCACGGCCAACTGTGTGACATAGTAACAGTTAACCTCCACTGACTGGTCAC[CG]TGCTCCAGGCACTGTCTTAAGTGGCTTGTATTCATTCCTTTAATCCTCATAACACCCTGA	CGGTGACCAGTCAGTGGAGGTTAACTGTTACTATGTCACACAGTTGGCCG	GNAO1;GNAO1	NM_138736;NM_020988	Body;Body				NA				RP11-441F2.2	ENST00000564074.1	TSS200	RP11-441F2.2	ENST00000564074.1	TSS200	NA	NA
cg00091760	0.768941	0.507495	2.52873e-07	2.92248e-05	chr10	124131072	+	chr10:124134088-124134933	N_Shelf	ACTAAGCATATGGAAGGGGCCCAAGAGCTATTTTTGAATGAAACATCAACGTACTTCACA[CG]TGCAAAGCATGATGATAATGATGACAGTGATACTTTAAAGGTAAACTGCAGGCTGGGGCA	CGTGCAAAGCATGATGATAATGATGACAGTGATACTTTAAAGGTAAACTG							NA										NA	TRUE
cg00092551	0.787635	0.897873	1.61541e-05	0.000680449	chr7	127371565	-		OpenSea	TTCCTCAGGAAAACATGCAGGGTTCCTCACAGCTGCTTGAGCCAGGCTCTGTCCTTCCTT[CG]CAGATTGCCCCGTGGCTGCCTGCCTCTTCACTCTCCTAAAGCTTTTTGGCTTTACCTTCC	ACATGCAGGGTTCCTCACAGCTGCTTGAGCCAGGCTCTGTCCTTCCTTCG	SND1	NM_014390	Body				TRUE							SND1;SND1	ENST00000468166.1;ENST00000465900.1	5'UTR;5'UTR	NA	TRUE
cg00092644	0.700989	0.804243	3.12333e-07	3.41852e-05	chr1	95360379	+		OpenSea	GTTATCAACAGTACAGACACATAATACTATTCTAACTTGTTCTTTTGTTTTTCAGAGTTT[CG]TAAAAAGGAGCAACAAATTAAACAATGCAAGGGCACAGCAGGACAAGCACTCATTAAGGA	GCTTGTCCTGCTGTGCCCTTGCATTGTTTAATTTGTTGCTCCTTTTTACG	SLC44A3;SLC44A3	NM_001114106;NM_152369	Body;Body				TRUE							SLC44A3	ENST00000475883.1	3'UTR	NA	TRUE
cg00094518	0.392333	0.103763	2.58873e-05	0.000981174	chr7	130418549	+	chr7:130417912-130419378	Island	GGTCTGGACGGAGCACGGGATCGGGTCGGAGAAGCCGGACGAGGCGCGTGGAGCTTCCCC[CG]AGTTCTCCCAGGAGCCCTCGCCAGAGCTGCCGCGCAAGTCCGCCCAGACGCTTGCAGCCA	TCTGGGCGGACTTGCGCGGCAGCTCTGGCGAGGGCTCCTGGGAGAACTCG	KLF14	NM_138693	1stExon				NA	7:130068467-130069793	7:130418325-130419878	Unclassified	KLF14	ENST00000310992.4	1stExon	KLF14	ENST00000310992.4	1stExon	NA	TRUE
cg00095259	0.67143	0.802656	3.50147e-06	0.000209802	chr18	59218797	+	chr18:59221451-59221986	N_Shelf	CTCAAAATACATTTAAAAATACAACATGTGGTTTAATTTTGTTGTTTTAGTTCAGTCCTA[CG]TAAAGAGAGGAAGAGTATAAATAAGTAACCTTTCTAAGTTCTTGGATCCCTGTGTCAAGA	GATCCAAGAACTTAGAAAGGTTACTTATTTATACTCTTCCTCTCTTTACG	CDH20	NM_031891	Body				NA		18:59218734-59219071	Unclassified							NA	TRUE
cg00095594	0.239754	0.0594354	8.06116e-06	0.000398782	chr1	236228625	+	chr1:236227682-236228817	Island	CAGCCCAATGGCCGCGAGGGGGAGGGCGAGGGGCGAAGCCGAACCTCCCGCCTTGGGCGC[CG]GTGCCTGCGATTCTCGAAACCAGCCCGACTCCCAGCGAACGGCGCCTCCGGGAGGGGGAG	GAGGCGCCGTTCGCTGGGAGTCGGGCTGGTTTCGAGAATCGCAGGCACCG	NID1	NM_002508	TSS200	high-CpG:234294997-234295293		DMR	NA	1:234293973-234295835	1:236227502-236228862	Unclassified	NID1;NID1	ENST00000264187.6;ENST00000366595.3	TSS200;TSS1500	NID1;NID1	ENST00000264187.6;ENST00000366595.3	TSS200;TSS1500	NA	TRUE
cg00096260	0.557194	0.698808	9.13963e-08	1.3995e-05	chr1	22051712	+		OpenSea	AGAGCCTTCTAACTGGTCAAGTCGAATGTGGCTCCAGAGGAAGAGCACAGGACTGTGAGT[CG]AGGTCACGGTCTAATCCAAGTTCTGCTACCAAGAAAATGAACCTGAACAAGTCACTTAAA	CGAGGTCACGGTCTAATCCAAGTTCTGCTACCAAGAAAATGAACCTGAAC	USP48	NM_032236	Body				NA				USP48	ENST00000374732.3	TSS200	USP48;USP48	ENST00000374732.3;ENST00000487880.2	TSS200;3'UTR	NA	NA
cg00096756	0.668059	0.784298	1.4344e-07	1.94444e-05	chr1	14678278	+		OpenSea	GAAGTACTCTCACTTCTGAGCTCTACCCCACAGCAAACACTCGGACCAGCAGCTAGACCC[CG]TATGCAATATACTTGTTGATCTGTGTACATCTTGTAAGGATTTTTATGCCTTTTAAAGTT	CATAAAAATCCTTACAAGATGTACACAGATCAACAAGTATATTGCATACG							NA				RP4-704D23.1	ENST00000447908.1	TSS1500	RP4-704D23.1	ENST00000447908.1	TSS1500	NA	NA
cg00098628	0.652536	0.753419	1.11797e-06	8.88348e-05	chr1	44257212	-		OpenSea	CATTTCCTTTTTTCTTTGGCTGTTTGAAGGCTCAGGCCCTGATTCTGCCTGCGGTGTTTG[CG]TAGGTACTCATGGCATGCATTTTGTGCACTAACATTTCCCCAACTATATAGTCTTTTTCC	CGCAAACACCGCAGGCAGAATCAGGGCCTGAGCCTTCAAACAGCCAAAGA	ST3GAL3;ST3GAL3;ST3GAL3;ST3GAL3;ST3GAL3;ST3GAL3;ST3GAL3;ST3GAL3;ST3GAL3;ST3GAL3;ST3GAL3;ST3GAL3;ST3GAL3;ST3GAL3;ST3GAL3;ST3GAL3;ST3GAL3;ST3GAL3;ST3GAL3;ST3GAL3;ST3GAL3;ST3GAL3;ST3GAL3;ST3GAL3;ST3GAL3	NR_073019;NR_073017;NR_073018;NR_073023;NR_073016;NR_073020;NR_073021;NM_001270465;NM_001270463;NM_001270464;NM_001270466;NM_174967;NM_174965;NM_174970;NM_174968;NM_174966;NM_174964;NM_174963;NM_006279;NM_001270459;NM_001270460;NM_001270461;NM_001270462;NM_174971;NM_174969	Body;Body;Body;Body;Body;Body;Body;Body;Body;Body;Body;Body;Body;Body;Body;Body;Body;Body;Body;Body;Body;Body;Body;Body;Body				NA				ST3GAL3	ENST00000461375.1	TSS1500	ST3GAL3	ENST00000461375.1	TSS1500	NA	NA
cg00099976	0.357753	0.100662	4.00942e-10	2.86434e-07	chr13	26625273	+	chr13:26624725-26626265	Island	CCGCGGCGCTTTCCGCGCGGGCCACTCCCCTCTGCCGCGACGCCCAGGAGGCGACGACGC[CG]GGCCCTAGGTCCAGGAGCTCCTAAGCCATCCCCGTCCTCAGCCGGTGGCCCGGTCCCCTT	CGGGCCCTAGGTCCAGGAGCTCCTAAGCCATCCCCGTCCTCAGCCGGTGG	SHISA2	NM_001007538	TSS200				NA	13:25522227-25524343			SHISA2	ENST00000319420.2	TSS200	SHISA2	ENST00000319420.2	TSS200	NA	TRUE
cg00105822	0.621503	0.798918	8.43589e-08	1.31702e-05	chr1	81696812	+		OpenSea	AGAAAGAAAAGGAAACTTCCCTACAATGCTGCTAGCCAGGCTTTATCTTTATGACACTAA[CG]ATAATCCCCTGTGTAATTAACTGTAGAGTGGTTATGCATGCAGCATGCAGCCCATGACAA	GCATGCTGCATGCATAACCACTCTACAGTTAATTACACAGGGGATTATCG							NA										NA	NA
cg00107187	0.268933	0.0846839	2.27164e-05	0.00088815	chr14	105070998	+	chr14:105070518-105071463	Island	CCACATGCCCTCGGTGAAGAGCAGGCAGCGGCCGCGGAAGTCGTGGCCGTTCTCGGACAG[CG]GGACCACCACCACGAAGCTGAACAGGAAGGCCAAGAAGTAGCAGGCGCACTGAGCGAAAA	CGGGACCACCACCACGAAGCTGAACAGGAAGGCCAAGAAGTAGCAGGCGC	TMEM179	NM_207379	1stExon			DMR	TRUE	14:104141463-104142634			RP11-614O9.3;TMEM179;TMEM179	ENST00000415614.2;ENST00000556573.1;ENST00000341595.3	1stExon;1stExon;1stExon	RP11-614O9.3;TMEM179;TMEM179	ENST00000415614.2;ENST00000556573.1;ENST00000341595.3	1stExon;1stExon;1stExon	TRUE	TRUE
cg00111505	0.208706	0.477748	1.21741e-05	0.000546883	chr2	219051109	-		OpenSea	TGTAAGAAATGACTTAGCAGAGCAGGAGACCACTAACTGTTCTGATAACACCTGAGATCA[CG]CAAGGTTGCTTGGTGGGGGGAGGCGGGGGCAGGTGCAGAATCTACTCTTGGAGGCCAGGG	CTTAGCAGAGCAGGAGACCACTAACTGTTCTGATAACACCTGAGATCACG							NA		2:219050950-219051453	Unclassified	snoU13	ENST00000459620.1	TSS1500	snoU13	ENST00000459620.1	TSS1500	NA	NA
cg00115040	0.175276	0.0267446	2.40485e-06	0.000157655	chr22	22011917	-	chr22:22011565-22012516	Island	CCGCGCGGATTGGCTGGGGCGGGGCGGCGCGGCTGCAGTAGGCTAGAGAGTCCGCACCTG[CG]CCGCGGCCGTGGGGAGAGAGGGTGCGTCCCGGCAGTCCCGCACGACGGGCCCCGCCTCCC	GCTGGGGCGGGGCGGCGCGGCTGCAGTAGGCTAGAGAGTCCGCACCTGCG				high-CpG:20341860-20341962			NA	22:20341566-20342609	22:22011063-22012798	Promoter_Associated	PPIL2	ENST00000498589.1	5'UTR	PPIL2	ENST00000498589.1	5'UTR	NA	TRUE
cg00117514	0.390893	0.810277	9.86188e-09	2.81618e-06	chr8	38776417	+		OpenSea	GATCTTAGCTTGGAGAGAATGATGCTGTCCTGACCCTGGCATCTGGTGTCTGCTCTCACA[CG]CAGACACCAGCCAGGATCTGCCAGTGAGATCCAAGTCCTGGATCCAGGCTCCAAGGCATG	CGCAGACACCAGCCAGGATCTGCCAGTGAGATCCAAGTCCTGGATCCAGG	PLEKHA2	NM_021623	Body				NA				PLEKHA2;PLEKHA2	ENST00000535929.1;ENST00000388745.4	5'UTR;5'UTR	PLEKHA2;PLEKHA2;PLEKHA2;PLEKHA2	ENST00000535929.1;ENST00000518571.1;ENST00000388745.4;ENST00000521784.1	5'UTR;5'UTR;5'UTR;5'UTR	NA	NA
cg00118507	0.701615	0.834462	1.67086e-08	4.07072e-06	chr1	113215934	+	chr1:113217475-113218097	N_Shore	AAAGCCACATAGCATCACACTTTTTACCCAAGGTTTTACTATACTGCAGACTTTTGTGTA[CG]TTTTGAGAACATCCAAGACATAAACCTGACCAGAGAAGAAGGGAGATTGTATCCAAGAAT	AATCTCCCTTCTTCTCTGGTCAGGTTTATGTCTTGGATGTTCTCAAAACG	MOV10;MOV10	NM_001130079;NM_020963	TSS1500;TSS1500				TRUE				MOV10;MOV10;MOV10;MOV10;MOV10;MOV10;MOV10	ENST00000413052.2;ENST00000369645.1;ENST00000544796.1;ENST00000285733.8;ENST00000369644.1;ENST00000468624.1;ENST00000357443.2	TSS1500;TSS1500;TSS1500;TSS1500;TSS1500;TSS1500;TSS1500	MOV10;MOV10;MOV10;MOV10;MOV10;MOV10;MOV10;MOV10;MOV10;MOV10;MOV10;MOV10	ENST00000413052.2;ENST00000369645.1;ENST00000486416.1;ENST00000486416.1;ENST00000544796.1;ENST00000461226.1;ENST00000369644.1;ENST00000496577.1;ENST00000475429.1;ENST00000468624.1;ENST00000465579.1;ENST00000357443.2	TSS1500;TSS1500;1stExon;5'UTR;TSS1500;TSS1500;TSS1500;TSS1500;TSS1500;TSS1500;TSS1500;TSS1500	NA	TRUE
cg00119964	0.47253	0.6371	3.685e-09	1.4425e-06	chr1	116248380	+		OpenSea	TGTCTAAGCCTGGACCCTTAGTTTTCTACAACCAGGAATTGCTAAAACCTTCAAACCAAA[CG]AGCTTCTGATTTACAGTTGGTTTCACAGCTCTGAGATAGTAAATGGGGCTTCCCTCCCTC	CGAGCTTCTGATTTACAGTTGGTTTCACAGCTCTGAGATAGTAAATGGGG	CASQ2	NM_001232	Body				NA										NA	NA
cg00120358	0.578602	0.754499	1.34557e-05	0.000591986	chr1	100615552	-		OpenSea	AAGAAGCCTAACCAATTTAAAATTCCTGACTTTAGTCTCATATATCTTGTCAGACTGTCT[CG]GTTCAAATTCCAAACCTACCATCTTCAGTTGTGCGACCTTGGGCATGCTACCTAATCTCT	CAATTTAAAATTCCTGACTTTAGTCTCATATATCTTGTCAGACTGTCTCG	LRRC39;CCDC76	NM_144620;NM_019083	Body;3'UTR				NA				CCDC76	ENST00000370141.2	3'UTR	CCDC76	ENST00000370141.2	3'UTR	NA	TRUE
cg00120552	0.490233	0.642739	2.01925e-05	0.000810175	chr1	21439223	-		OpenSea	ATTCCCACAAAGATGTTTTCTTTCTTATAGCATTCAGCAGCATTTCATTTCAAAATAAAA[CG]CCTAAAGGAAAGCATGTTATAATAAAAATATTCTCAAATAGAAAGCTTTTCAGCACATTC	ATGTTTTCTTTCTTATAGCATTCAGCAGCATTTCATTTCAAAATAAAACG	EIF4G3;EIF4G3;EIF4G3;EIF4G3	NM_003760;NM_001198803;NM_001198802;NM_001198801	TSS1500;5'UTR;5'UTR;5'UTR				NA				EIF4G3;EIF4G3	ENST00000463775.1;ENST00000400422.1	TSS1500;5'UTR	EIF4G3;EIF4G3;EIF4G3;EIF4G3	ENST00000463775.1;ENST00000400422.1;ENST00000411888.1;ENST00000438975.1	TSS1500;5'UTR;5'UTR;5'UTR	NA	NA
cg00124375	0.498391	0.0921142	1.86632e-05	0.000761989	chr6	31698218	+	chr6:31695894-31698245	Island	CACCCAGATCTGGCCGGCCCTGGCGACGGGGCTGCAAACGCTTCGTAGACCTCAGAACAG[CG]CAACGGCGGACCGGCGGACCGGCACGAAACATAGCAGCCCCACCACAAACATTTCCCTTC	TTGTGGTGGGGCTGCTATGTTTCGTGCCGGTCCGCCGGTCCGCCGTTGCG	DDAH2	NM_013974	TSS200	high-CpG:31805554-31806443			NA	6:31805255-31806224	6:31696696-31698363	Promoter_Associated	DDAH2;DDAH2;DDAH2;DDAH2;DDAH2	ENST00000375792.3;ENST00000375789.2;ENST00000375792.3;ENST00000375787.2;ENST00000480913.1	5'UTR;TSS1500;1stExon;TSS200;TSS1500	DDAH2;DDAH2;DDAH2;DDAH2;DDAH2;DDAH2;DDAH2;DDAH2;DDAH2;DDAH2	ENST00000375792.3;ENST00000436437.1;ENST00000469963.1;ENST00000375789.2;ENST00000416410.1;ENST00000375792.3;ENST00000488119.1;ENST00000483792.1;ENST00000375787.2;ENST00000480913.1	5'UTR;TSS1500;TSS1500;TSS1500;TSS1500;1stExon;TSS200;TSS200;TSS200;TSS1500	NA	TRUE
cg00127167	0.167993	0.0357101	9.37105e-06	0.000446555	chr5	5140029	-	chr5:5139441-5140941	Island	GGCGGCGCCGGTGCGGCCCGGAGGTGGGAGCCCGCGGAGCCACTGCAGTAGCTGGAGTCC[CG]CCGAGTCCCCAGCCCCAAGGCAGGGCAGGAGCGCGCACCGGCCGGAGGTCCATGCTGAGC	GCGGCCCGGAGGTGGGAGCCCGCGGAGCCACTGCAGTAGCTGGAGTCCCG	ADAMTS16	NM_139056	TSS1500				NA	5:5192180-5193936	5:5139972-5140079	Unclassified_Cell_type_specific	CTD-2297D10.2;ADAMTS16	ENST00000512155.1;ENST00000511368.1	3'UTR;TSS1500	CTD-2297D10.2;ADAMTS16;ADAMTS16	ENST00000512155.1;ENST00000511368.1;ENST00000433402.2	3'UTR;TSS1500;TSS1500	NA	TRUE
cg00133954	0.661449	0.245147	6.76844e-07	6.0733e-05	chr10	116311531	-		OpenSea	ATTTTCCTGCCTCACCACTATGATCATTCTGCACTGAGGGCTTTCTAGAATCAGGTACCA[CG]TGAGGGCTTTGTAAACATGGTACCATTTAGTTTTCACAATCATTCTAGTCAAAGTGCCTT	CGTGGTACCTGATTCTAGAAAGCCCTCAGTGCAGAATGATCATAGTGGTG	ABLIM1;ABLIM1;ABLIM1	NM_002313;NM_001003407;NM_001003408	Body;Body;Body				TRUE				ABLIM1	ENST00000481974.1	3'UTR	ABLIM1	ENST00000481974.1	3'UTR	NA	NA
cg00134776	0.342909	0.0503369	1.42131e-06	0.000106395	chr3	139653573	+	chr3:139653430-139655115	Island	CCCCTAGCACCACTAGGCGCTGCTCTAGTGTGCGCCTGGCGCCCTCCCCAGACCAGTCGA[CG]CAGAACGCCCAGAGACCCAGCCAAGGGCAAGACCCTTAGCGACGCCCGTCAGTCCTCTCC	CGCAGAACGCCCAGAGACCCAGCCAAGGGCAAGACCCTTAGCGACGCCCG	CLSTN2	NM_022131	TSS1500			CDMR	NA	3:141136121-141137805	3:139653383-139653703	Unclassified_Cell_type_specific	CLSTN2	ENST00000458420.2	TSS1500	CLSTN2;CLSTN2	ENST00000458420.2;ENST00000511524.1	TSS1500;TSS1500	NA	TRUE
cg00135056	0.731901	0.439446	2.9052e-06	0.000181977	chr3	128997295	-	chr3:128997382-128997600	N_Shore	TGCGCGATTCCTGGAAGTTCTTCTGACTTTCATTTCTTCAGTGTTCCTCCATTTTTGCCT[CG]CACTGTGAGGCAGCTGGCAGGACTGTGAAGTAAGGAGTGGAGTTTCCTGGTTTCCCGCCT	GGAAGTTCTTCTGACTTTCATTTCTTCAGTGTTCCTCCATTTTTGCCTCG	C3orf37;C3orf37	NM_020187;NM_001006109	TSS1500;TSS1500				NA		3:128997156-128999004	Promoter_Associated	C3orf37;C3orf37;C3orf37;C3orf37	ENST00000383463.3;ENST00000417226.2;ENST00000502878.1;ENST00000389735.3	TSS1500;TSS1500;TSS1500;TSS1500	C3orf37;C3orf37;C3orf37;C3orf37;C3orf37;C3orf37;C3orf37;C3orf37	ENST00000509042.1;ENST00000383463.3;ENST00000417226.2;ENST00000510314.1;ENST00000502878.1;ENST00000389735.3;ENST00000509551.1;ENST00000511665.1	TSS1500;TSS1500;TSS1500;TSS1500;TSS1500;TSS1500;TSS1500;TSS1500	TRUE	TRUE
cg00136902	0.504813	0.673849	1.20053e-08	3.21722e-06	chr19	31810147	+		OpenSea	CCACCTCACAACTTAGCAACACTGCAGAAACAAGCAGGCTATGAATAGCACCTGCCAAGA[CG]GCTGGCTCAGCTGCAGATAAAAAGAAGAACGTTGTCAACACAAAAGCCTTCTATTACAAA	CGGCTGGCTCAGCTGCAGATAAAAAGAAGAACGTTGTCAACACAAAAGCC	TSHZ3	NM_020856	Body				NA							TSHZ3	ENST00000558569.1	3'UTR	NA	NA
cg00136968	0.330171	0.80831	1.53721e-09	7.55079e-07	chr7	4050043	-		OpenSea	GGCTGGCAGAGTCCCTCTTGCACACCTGCTGGAAAGCTGGGTGGGAAGATATTCTAAGCT[CG]CTGTGAATTTCATTACGCCTCTCTCCAGCCAAAGCCACTCAAGGGTGTGGTGGTGTAATG	CCCTCTTGCACACCTGCTGGAAAGCTGGGTGGGAAGATATTCTAAGCTCG	SDK1	NM_152744	Body				NA	7:4016450-4016654			SDK1	ENST00000446104.1	5'UTR	SDK1	ENST00000446104.1	5'UTR	NA	TRUE
cg00137715	0.301977	0.58366	2.65945e-08	5.70775e-06	chr4	139949564	+		OpenSea	CTGGCAAAGAGAGGTTGTTTGGATTGTCACACTCAGTCTAGGTGCTTGTATTTTTAGACA[CG]TTAGGTTGAGAGTTCTGACCTTCACTTGATATCTCTGGTAATGCCAAGCGGGTCGTGGCA	CTTGGCATTACCAGAGATATCAAGTGAAGGTCAGAACTCTCAACCTAACG	NOCT	NM_012118	Body				NA				ELF2	ENST00000515489.1	3'UTR	ELF2	ENST00000515489.1	3'UTR	NA	NA
cg00138926	0.496775	0.773328	3.99508e-07	4.08777e-05	chr2	11118414	+		OpenSea	CCGTGCTTCTCCCATATTCTCTCACTGAGTGCTCGCAGCGACTCTGTAACACACTCGCAC[CG]TCCTTGTTATCGGGCCCCTTTTACAAATGAGGGATGAAGAGAACAGCTGTTTCTACCAGA	AGCTGTTCTCTTCATCCCTCATTTGTAAAAGGGGCCCGATAACAAGGACG							NA	2:11035777-11035878									NA	TRUE
cg00142106	0.508094	0.0664131	1.9209e-07	2.40327e-05	chr6	29760769	-	chr6:29759946-29760903	Island	GGGGCGGGGCCAGGGTCTCACACCCATCTAGAGGATGTCTGTCTGCGACGTGGGGTCGGA[CG]GGCGCCTACTCCGCGGGTATCACCAGCTTGCTTACGATGGCAAGGATTACATCGTCCTGA	GGGTCTCACACCCATCTAGAGGATGTCTGTCTGCGACGTGGGGTCGGACG	HCG4	NR_002139	Body			DMR	NA	6:29867896-29868847	6:29759909-29761489	Promoter_Associated	HLA-P	ENST00000457107.1	5'UTR	HLA-P;HLA-P;HLA-P;HLA-P	ENST00000446817.1;ENST00000457931.1;ENST00000476601.1;ENST00000457107.1	5'UTR;5'UTR;5'UTR;5'UTR	NA	TRUE
cg00144673	0.338329	0.493738	7.93269e-06	0.00039396	chr6	31497557	+		OpenSea	TGCTCCCTCCCTTAATTCCCTGACCAGGGCCCTGGGACCCACCGCACAGCTGAGCTGGCC[CG]AGCTGAAGAGTTGTTGGAGCAGCAGCTGGAGCTGTACCAGGCCCTCCTTGAAGGGCAGGA	AGGAGGGCCTGGTACAGCTCCAGCTGCTGCTCCAACAACTCTTCAGCTCG	MCCD1	NM_001011700	Body				TRUE										NA	TRUE
cg00149716	0.874065	0.736577	2.85121e-07	3.19294e-05	chr20	13200069	-	chr20:13200670-13202616	N_Shore	AGGATCCTTCCAGGATTTAAAAGCTGCTGGGATCCCCTCTTTGATCTCCCATCTGAAATA[CG]GACGGTTATTGTTTCGCGTTTCCCCCCACTCCCCCCGACCCGCACTCCAGTGACAATTAT	GGATTTAAAAGCTGCTGGGATCCCCTCTTTGATCTCCCATCTGAAATACG						CDMR	NA	20:13148069-13148177									NA	TRUE
cg00149859	0.891297	0.465789	6.14519e-10	3.88608e-07	chr17	72476628	-		OpenSea	ATAGGCAGCACCCTTATAGAGCAGGTGCCAGCAGCCAAGGGCTGTGTGAGCCTGAGCTGG[CG]TCCCTGGGGCTGACAGGCCTCCTTCCCTACGGCCTGGGGCAGCAGGCAGGTGGGCTGTCT	CGCCAGCTCAGGCTCACACAGCCCTTGGCTGCTGGCACCTGCTCTATAAG	CD300A;CD300A	NM_007261;NM_001256841	Body;Body				NA										NA	NA
cg00152127	0.561573	0.194067	7.64078e-13	2.80192e-09	chr20	45947878	-		OpenSea	GGAAGAAGCAAAGAGAACAGGCTAAGAGTCACCACTTACCAGGCCAGCCCCGGTCTTGTA[CG]CATTAGGTCGCCCGGCGGGGCAAGGACACTGTCACCTCTTTGCAATCAGGCAGTCTGAAA	GAGAACAGGCTAAGAGTCACCACTTACCAGGCCAGCCCCGGTCTTGTACG	LOC100131496;ZMYND8;ZMYND8;ZMYND8;ZMYND8;ZMYND8;ZMYND8;ZMYND8;ZMYND8;ZMYND8;ZMYND8;ZMYND8;ZMYND8;ZMYND8;ZMYND8;ZMYND8;ZMYND8;ZMYND8;ZMYND8	NR_024594;NM_001281780;NM_001281779;NM_001281769;NM_001281774;NM_001281773;NM_001281772;NM_183048;NM_183047;NM_012408;NM_001281778;NM_001281777;NM_001281776;NM_001281775;NM_001281783;NM_001281782;NM_001281781;NM_001281771;NM_001281784	Body;5'UTR;5'UTR;Body;Body;Body;Body;Body;Body;Body;Body;Body;Body;Body;Body;Body;Body;Body;Body				TRUE	20:45381285-45381460			ZMYND8	ENST00000468376.1	TSS200	ZMYND8	ENST00000468376.1	TSS200	NA	NA
cg00152259	0.257461	0.386304	9.09993e-06	0.000436997	chr17	34957477	+	chr17:34957833-34958790	N_Shore	TTGACAAAGCGAAGACAGGTGTGCAAGGCTGAGAGGTCTGGAAGAGCATGCAGTGCTGTG[CG]AACAGCTCAGAACTTAAGCACAGGAGCAAGGAGCCAGATGGGGCTGAAGAGGCAGCTCCT	TTCAGCCCCATCTGGCTCCTTGCTCCTGTGCTTAAGTTCTGAGCTGTTCG	MRM1	NM_024864	TSS1500				NA		17:34957379-34960313	Promoter_Associated	MRM1	ENST00000250156.6	TSS1500	MRM1	ENST00000250156.6	TSS1500	NA	TRUE
cg00153114	0.200711	0.590011	8.05851e-15	7.452e-11	chr14	103857593	-		OpenSea	GTACGTAGGACAGCCTTCCACAGCAAAGAATTACCCGGCCTAAAATGTCAGTAGTGCCAG[CG]TTGAGAAACCCTGGTATGTACTTAGCCCCCCATGTACTCAACAGCGCAGCTCAGTGGCCA	CGCTGGCACTACTGACATTTTAGGCCGGGTAATTCTTTGCTGTGGAAGGC	MARK3;MARK3;MARK3;MARK3;MARK3	NM_001128919;NM_002376;NM_001128921;NM_001128920;NM_001128918	Body;Body;Body;Body;Body				NA		14:103856759-103858342	Promoter_Associated	MARK3	ENST00000411530.1	5'UTR	MARK3;MARK3;MARK3;MARK3	ENST00000411530.1;ENST00000559328.1;ENST00000560603.1;ENST00000558223.1	5'UTR;5'UTR;5'UTR;5'UTR	NA	NA
cg00154554	0.683979	0.802376	2.09838e-07	2.55859e-05	chr1	8729713	+		OpenSea	AAAAACCACCTTTTAAAGCTGTAAAAACACAGTCAATTAAACTAGTAGAGTTTTATTTCA[CG]TAATGCTGAGAATGAAAGAGAGCCTTCTTTGGACCACGGTAATCTTTAATATACAGGAAT	TAAAGATTACCGTGGTCCAAAGAAGGCTCTCTTTCATTCTCAGCATTACG	RERE;RERE	NM_012102;NM_001042681	5'UTR;5'UTR				TRUE				RERE;RERE;RERE	ENST00000480342.1;ENST00000337907.3;ENST00000400908.2	3'UTR;5'UTR;5'UTR	RERE;RERE;RERE;RERE	ENST00000468247.1;ENST00000480342.1;ENST00000337907.3;ENST00000400908.2	3'UTR;3'UTR;5'UTR;5'UTR	NA	TRUE
cg00157796	0.791981	0.171571	1.78029e-11	2.85511e-08	chr6	159590231	+	chr6:159589636-159591319	Island	AAAATGAGAGGGTTAGACGAGGGGAGGAACTTCCTCAGCCACTTGGCCCGGCACAGCGAC[CG]CCCCAAGTTCAGAACCGCTAAGTCAGTCCGGGGCGCTCCGGCCCCTTCGTCCCGCGCCCC	CGCCCCAAGTTCAGAACCGCTAAGTCAGTCCGGGGCGCTCCGGCCCCTTC	FNDC1	NM_032532	TSS200			DMR	NA	6:159509658-159511307	6:159589536-159591286	Unclassified	FNDC1	ENST00000340366.6	TSS200	FNDC1	ENST00000340366.6	TSS200	NA	TRUE
cg00161770	0.702176	0.813413	9.46597e-08	1.44014e-05	chr1	63043009	-		OpenSea	GAATAAGCCTGTGGTGGTTTTTCCAATGAGACTGGCAAGCAAAACTGGCCAGTCTTCAAC[CG]TCCATTCTGAAGCATTGGTATCCACTTTTAAATGAAAAGAAAACAATTTTATTTTAAATA	CGGTTGAAGACTGGCCAGTTTTGCTTGCCAGTCTCATTGGAAAAACCACC	DOCK7	NM_033407	Body				TRUE										NA	TRUE
cg00165429	0.363696	0.630451	2.25596e-10	1.92699e-07	chr1	90033656	-		OpenSea	ATGTTAAGTCTTTCACGTTTCCCCTATTTAAGAAGCATAGATACTTTCAGTTTGTTTTTC[CG]TCTTACATTTGTAAAATCAGTGGTACTCATATATAATGCTATCTTATTCTCCATTAAAAA	CGGAAAAACAAACTGAAAGTATCTATGCTTCTTAAATAGGGGAAACGTGA	LRRC8B;LRRC8B	NM_001134476;NM_015350	5'UTR;5'UTR				NA				LRRC8B;LRRC8B;LRRC8B	ENST00000541858.1;ENST00000439853.1;ENST00000358200.4	TSS1500;TSS200;5'UTR	LRRC8B;LRRC8B;LRRC8B;LRRC8B	ENST00000541858.1;ENST00000439853.1;ENST00000449440.1;ENST00000358200.4	TSS1500;TSS200;5'UTR;5'UTR	NA	NA
cg00170236	0.297166	0.526277	4.8658e-06	0.000269827	chr7	99691604	+		OpenSea	ACCCCAACCACCCTCTCAGTGAAGGTTAAGAAGTGGGGAAAAGGCCTTTCCCTCCACGGA[CG]CTGTGCGTGCCCTGCTGGAGCAGCAAGTACCCACAGTGCGGTAGCACGGAGAGGACCACT	CGCTGTGCGTGCCCTGCTGGAGCAGCAAGTACCCACAGTGCGGTAGCACG	MIR25;MCM7;MCM7;MIR93	NR_029498;NM_005916;NM_182776;NR_029510	TSS1500;Body;Body;TSS200				NA				MIR25;MIR93	ENST00000384816.1;ENST00000385024.1	TSS1500;TSS200	MCM7;MCM7;MIR25;MIR93;MCM7;MCM7	ENST00000491245.2;ENST00000493352.1;ENST00000384816.1;ENST00000385024.1;ENST00000489841.1;ENST00000485286.1	3'UTR;3'UTR;TSS1500;TSS200;3'UTR;3'UTR	NA	TRUE
cg00174851	0.214572	0.502409	7.47638e-06	0.00037601	chr7	134142981	-	chr7:134143115-134144063	N_Shore	CATATCATATTATCATTTTTCATATCCTATGATGTTTCATGTCCTATTGTCATTCTCATC[CG]GCTAGGCACTTCTCGGGGACGCTGTGTGGTGTTGAGGTTTTACAGGGAAAATGCTAACCT	TCATTTTTCATATCCTATGATGTTTCATGTCCTATTGTCATTCTCATCCG	AKR1B1	NM_001628	Body			CDMR	NA		7:134142875-134144626	Promoter_Associated				AKR1B1;AKR1B1;AKR1B1;AKR1B1;AKR1B1;AKR1B1;AKR1B1;AKR1B1	ENST00000462784.1;ENST00000465351.1;ENST00000487438.1;ENST00000489022.1;ENST00000491741.1;ENST00000497983.1;ENST00000484592.1;ENST00000467829.1	3'UTR;3'UTR;3'UTR;3'UTR;3'UTR;3'UTR;3'UTR;3'UTR	NA	TRUE
cg00175859	0.240051	0.0321863	9.75075e-07	8.00829e-05	chr6	138428631	+	chr6:138428188-138428816	Island	GGCGCCGCCACAAAAGCGAAGAGGCCGCGGGGAGGCGGCTCCCGAGGACGCCGCTCCGGG[CG]GCCCCACCTAGATTCCGGTGACTCAGAGCGCGCCCGCCCCGACCTGCCCTGCCGGGCCGG	GGCAGGTCGGGGCGGGCGCGCTCTGAGTCACCGGAATCTAGGTGGGGCCG	PERP;PERP	NM_022121;NM_022121	1stExon;5'UTR	high-CpG:138470243-138470715			NA	6:138469804-138470892			PERP;PERP;PERP	ENST00000421351.2;ENST00000265603.8;ENST00000421351.2	5'UTR;TSS200;1stExon	PERP;PERP;PERP	ENST00000421351.2;ENST00000265603.8;ENST00000421351.2	5'UTR;TSS200;1stExon	NA	TRUE
cg00176043	0.152152	0.322259	1.77704e-07	2.27001e-05	chr1	67900465	-	chr1:67895135-67896826	S_Shelf	CCAAAAAGGCTGCACAATTTAACAGTCCCACCAACAATTATGTGAGTTCCAAGTTCTCCA[CG]TCCTCACTAATGTTTGTTATTGTCTGTCTTTTTTATTATAACCATTCTACTGGGTGTGAA	CACAATTTAACAGTCCCACCAACAATTATGTGAGTTCCAAGTTCTCCACG							NA										NA	TRUE
cg00178661	0.638228	0.765835	1.13644e-05	0.000518581	chr1	117208338	+	chr1:117209824-117210621	N_Shore	CCTAAAATCTCCCCTACCAGGCAGCTTCCTTTTCTTCAGGCTCTCCTTCTCCCAGAACTA[CG]ATCTAAGCTTCCTTGGTGAGGAGACACAGGACTAGTGCCCTCACATTTTTAGCCTTCAGA	AAATGTGAGGGCACTAGTCCTGTGTCTCCTCACCAAGGAAGCTTAGATCG	IGSF3;IGSF3	NM_001007237;NM_001542	Body;Body			RDMR	NA										NA	TRUE
cg00181439	0.569156	0.378763	2.01255e-06	0.00013808	chr6	78172691	+	chr6:78172231-78174088	Island	TGGGAGTCCTTTTAGCTGAGTACTCCACGGCGTCCGTGATGGCCCAGTAGCGGTCCAGGG[CG]ATGACACAGAGGTGCAGGATGGAGGCAGTGCAACAAGTGATGTCCGACGACAGCCAGAAG	GTCGGACATCACTTGTTGCACTGCCTCCATCCTGCACCTCTGTGTCATCG	HTR1B	NM_000863	1stExon			RDMR	NA	6:78228951-78230811	6:78171812-78172761	Unclassified	HTR1B	ENST00000369947.2	1stExon	HTR1B	ENST00000369947.2	1stExon	NA	TRUE
cg00190795	0.525245	0.653579	1.5072e-05	0.000645862	chr3	195599898	-	chr3:195600845-195602361	N_Shore	AGGGCCTTGCACTAGGCTGGGGGCCAGGCCTCCAGCTACAACCTGCCTCCCGAATGCAGA[CG]CGGGAGAGTCTAGGAGCACTCGGGCAACTCAGTCCCTCCCTCCACCGCTTCACCTGCTTC	TAGGCTGGGGGCCAGGCCTCCAGCTACAACCTGCCTCCCGAATGCAGACG	TNK2;TNK2	NM_001010938;NM_005781	Body;Body				NA	3:197084285-197084358	3:195599892-195600079	Unclassified_Cell_type_specific				TNK2;TNK2;TNK2;TNK2;TNK2;TNK2;TNK2;TNK2	ENST00000478623.1;ENST00000489628.1;ENST00000416152.1;ENST00000478715.1;ENST00000468680.1;ENST00000464041.1;ENST00000481865.1;ENST00000486523.1	3'UTR;3'UTR;TSS1500;TSS1500;TSS1500;3'UTR;3'UTR;3'UTR	NA	TRUE
cg00193581	0.654561	0.789347	1.74558e-09	8.28104e-07	chr1	77879926	+		OpenSea	TAGATTCAGAAATGAAACACAACCCTTACAGGTTTAATTTTCGTTAAAATTAAACTGTAA[CG]AAACTGTTAATGAAAATAAAACTGTAAGCTACGCTGTAAGGGACAGGACAAGGGAGAAAC	CGAAACTGTTAATGAAAATAAAACTGTAAGCTACGCTGTAAGGGACAGGA	AK5;AK5	NM_174858;NM_012093	Body;Body				NA							AK5;AK5	ENST00000465146.1;ENST00000530826.1	5'UTR;5'UTR	NA	NA
cg00198926	0.691169	0.470177	6.49027e-07	5.87492e-05	chr12	91252122	-		OpenSea	CTCTATAGCTGTTTGAGTAACTTCTCTTATCCATAAAGCTGTCTGCATAATTCCCCCTTG[CG]TATGTAGTTCTGGGTATGTCTCTAGGCAGGCACAATGTGCACTTCTTTTGTTTGTATAAA	CGCAAGGGGGAATTATGCAGACAGCTTTATGGATAAGAGAAGTTACTCAA							NA										NA	NA
cg00200563	0.0940996	0.28692	1.08621e-06	8.69828e-05	chr5	147764304	-	chr5:147763283-147763666	S_Shore	CCTGAAAAGCATATTCTCCCTGCACTCTGCACACCCAGAATTTGACTAAGAGATGTCTAC[CG]TGTTTCTTTGCAGACACCAAGCTGGCCAAGGGCAACTGGTCACTTAGGAAGGTTCCTGTG	CGGTAGACATCTCTTAGTCAAATTCTGGGTGTGCAGAGTGCAGGGAGAAT	LOC102546294;FBXO38;FBXO38	NR_105057;NM_001271723;NM_030793	TSS1500;5'UTR;5'UTR				NA		5:147762678-147764339	Promoter_Associated	RP11-373N22.3;FBXO38;FBXO38;FBXO38	ENST00000501695.3;ENST00000340253.5;ENST00000296701.6;ENST00000394370.3	TSS1500;5'UTR;5'UTR;5'UTR	RP11-373N22.3;FBXO38;FBXO38;FBXO38;FBXO38;FBXO38;FBXO38;FBXO38;FBXO38	ENST00000501695.3;ENST00000504971.1;ENST00000340253.5;ENST00000503613.1;ENST00000296701.6;ENST00000394370.3;ENST00000508326.1;ENST00000509411.1;ENST00000511080.1	TSS1500;TSS200;5'UTR;5'UTR;5'UTR;5'UTR;5'UTR;5'UTR;5'UTR	NA	NA
cg00201145	0.471588	0.650039	3.10129e-07	3.40065e-05	chr1	26436760	+	chr1:26437319-26438917	N_Shore	CCACACAGGTAGTTAGCTGTCTACGCAGAGCCTTCTATATTTTCCCTCTACTTTTGAGGG[CG]GGAAATAAGTCTTGGCTGACACCAGTGTTTCCAGCAAACAGCTGAAGACTTGACACTTGG	TCTTCAGCTGTTTGCTGGAAACACTGGTGTCAGCCAAGACTTATTTCCCG	PDIK1L	NM_001243532	TSS1500				NA							PDIK1L	ENST00000444713.1	TSS1500	NA	NA
cg00205522	0.205569	0.433529	4.84162e-07	4.71935e-05	chr4	5814803	-		OpenSea	AAATAGACTCTCTTAGAAACAAGTGACTCCTTCCCAGTGGCCAAAACTTAATCATCAGAG[CG]CTTCCTTCAGTTCCTCACCCATCAGCCAGTGGGCTCTCCAAAGTTAACCAACAGCTCCCT	CGCTCTGATGATTAAGTTTTGGCCACTGGGAAGGAGTCACTTGTTTCTAA	EVC;EVC	NM_153717;NM_001306090	3'UTR;3'UTR				NA		4:5814599-5815039	Unclassified	EVC;EVC	ENST00000264956.6;ENST00000382674.2	3'UTR;3'UTR	EVC;EVC;CRMP1	ENST00000264956.6;ENST00000382674.2;ENST00000506216.1	3'UTR;3'UTR;3'UTR	NA	NA
cg00207926	0.225492	0.0523604	2.55726e-07	2.94691e-05	chr22	37915326	+	chr22:37914768-37915883	Island	GGGCTAGATGTGCGGCCAAGCACCCCCGGGGCGTCGTCCGCAGACCCGCCGTCGGGGGCG[CG]CCCCGAGCTCCCCGCGACTCACCCCGCACGCTACAGTCGCCTCGGGCTCCCGGGTCCGCA	AGCCCGAGGCGACTGTAGCGTGCGGGGTGAGTCGCGGGGAGCTCGGGGCG	CARD10	NM_014550	TSS200				NA	22:36244787-36245829	22:37915002-37915990	Unclassified_Cell_type_specific	CARD10;CARD10	ENST00000403299.1;ENST00000251973.5	5'UTR;TSS200	CARD10;CARD10	ENST00000403299.1;ENST00000251973.5	5'UTR;TSS200	NA	TRUE
cg00209355	0.550016	0.769483	2.81943e-07	3.17003e-05	chr1	23370587	-		OpenSea	ATGCTGAATTGCAATGCCAGATTCTAGAGTCTATGTCAGCTCCATTTTCAGTCTAGCAGC[CG]TTAGTAAAAGACACTCGGAATCCATTTTCCCCCATCCAGACTATTAATATTAAATAAGAC	CGGCTGCTAGACTGAAAATGGAGCTGACATAGACTCTAGAATCTGGCATT	MIR3115;KDM1A;KDM1A	NR_036057;NM_015013;NM_001009999	TSS1500;Body;Body				NA				RP1-184J9.2	ENST00000427154.1	3'UTR	RP1-184J9.2	ENST00000427154.1	3'UTR	NA	NA
cg00209431	0.639486	0.785213	3.29169e-06	0.000199774	chr22	42552804	-	chr22:42548152-42549207	S_Shelf	GAACAGTGGTACTGCTGTGTCATGGTAAAAAGTGCACTGTGCCCTGGCAGGCCCTATGGA[CG]TTGCCAAGTGAGATGGTGTGAAAATATGTCAGCAAGTGGTAGACTAGGAAACTGCGGGCT	CGTCCATAGGGCCTGCCAGGGCACAGTGCACTTTTTACCATGACACAGCA							NA										NA	NA
cg00210288	0.725058	0.856174	1.54552e-06	0.000113246	chr22	19044753	+		OpenSea	GGTGGGGCTGGACAACATCACATCAGAGGACAAGCTGTGCAGTCCTCAAGGGGACCATGG[CG]TCAGACAGGATCATCAACCACAGGGCCTGGACCGCCAAGTACTGGTGGTCACTGTGGCCA	CCACCAGTACTTGGCGGTCCAGGCCCTGTGGTTGATGATCCTGTCTGACG	DGCR2;DGCR2;DGCR2;DGCR2;DGCR2	NR_033674;NM_001184781;NM_001173534;NM_001173533;NM_005137	Body;Body;Body;Body;Body				NA				DGCR2;DGCR2	ENST00000473832.1;ENST00000545799.1	3'UTR;3'UTR	DGCR2;DGCR2;DGCR2;DGCR2	ENST00000473832.1;ENST00000467659.1;ENST00000545799.1;ENST00000389262.4	3'UTR;TSS200;3'UTR;5'UTR	NA	NA
cg00213479	0.307223	0.0971386	1.21675e-06	9.4725e-05	chr5	2038899	-	chr5:2038527-2038949	Island	GCCGGGTCAGGGTCAGGATCTGACCCGAGTCTGGGTCAAGCCATGGCGGGCGGCAGGCAG[CG]GACGGCGGCGCCCAGGCAGTGCGCCCTCTGCTGGCCACTCGTGTACACGCTGGCTCCAGC	TCAGGATCTGACCCGAGTCTGGGTCAAGCCATGGCGGGCGGCAGGCAGCG						DMR	NA	5:2091472-2091910	5:2038315-2039307	Unclassified_Cell_type_specific							NA	TRUE
cg00216061	0.391486	0.797992	4.47419e-09	1.65272e-06	chr16	88547579	-		OpenSea	TAATGAGCAGGAGACGGATGGGCGCACGGGTGTCTGCTGGCTGTGATAACCAAGGGGCTC[CG]GGCACCACAGGGGCTGAGCCCAGTGCTGCCCTGGCCGCCAATGACCACAGCCATAGCCCG	GACGGATGGGCGCACGGGTGTCTGCTGGCTGTGATAACCAAGGGGCTCCG	ZFPM1	NM_153813	Body				NA	16:87075034-87075081			ZFPM1	ENST00000569086.1	5'UTR	ZFPM1;ZFPM1;ZFPM1;ZFPM1	ENST00000562417.1;ENST00000569086.1;ENST00000563351.1;ENST00000562437.1	5'UTR;5'UTR;5'UTR;5'UTR	NA	TRUE
cg00216281	0.527326	0.716142	1.27076e-06	9.79387e-05	chr1	35498726	-	chr1:35497121-35497587	S_Shore	CAGGGGAAATTAGACTCTTATTATCTCTTTTTCCTGACTTTTCAGAACTTCAAATAACAA[CG]TAGTTTCCATTTGATGACATGGAACCTCAGTGTGAGTGACTCCATTTTGATTTTTAGTCT	GACTCTTATTATCTCTTTTTCCTGACTTTTCAGAACTTCAAATAACAACG	ZMYM6	NM_007167	TSS1500				NA				ZMYM6;ZMYM6;ZMYM6;ZMYM6	ENST00000373333.1;ENST00000493328.1;ENST00000317538.5;ENST00000373340.2	TSS1500;TSS1500;TSS1500;TSS1500	ZMYM6;ZMYM6;ZMYM6;ZMYM6;ZMYM6;ZMYM6;ZMYM6;ZMYM6	ENST00000415531.1;ENST00000373333.1;ENST00000493328.1;ENST00000487874.1;ENST00000460607.1;ENST00000317538.5;ENST00000471566.1;ENST00000373340.2	TSS1500;TSS1500;TSS1500;TSS1500;TSS1500;TSS1500;TSS1500;TSS1500	NA	NA
cg00219282	0.415922	0.120042	1.52455e-05	0.000651638	chr6	159654898	-	chr6:159653233-159655397	Island	GCGCGCCAAGGAGGCAGCTGCGTCCCTTCCCAAGCACCAGCAGGTGGAGTCTCCCACAGG[CG]CAGGGGCAGGTGGCGACCACAGGTCCCAGCGCGGACATGCGGCCTCCCCCGCCAGGCCCA	CGCCTGTGGGAGACTCCACCTGCTGGTGCTTGGGAAGGGACGCAGCTGCC	FNDC1	NM_032532	Body				NA	6:159573090-159575387									NA	TRUE
cg00222582	0.435077	0.577621	2.20457e-06	0.000148008	chr8	8056586	+		OpenSea	CCGCCAGCCGCATTTCAGTATCCGCCGTCTCCAGAGGTTCAGTATGGATCTCAGGCGGTG[CG]TCCTGTGCCAAATAGCAAGGCACTATATCAACCCACGGCGATGGCGTTTGATCTTACGGT	AACGCCATCGCCGTGGGTTGATATAGTGCCTTGCTATTTGGCACAGGACG							NA	8:8093937-8094055			RP11-556O5.5	ENST00000519726.1	3'UTR	RP11-556O5.5	ENST00000519726.1	3'UTR	NA	NA
cg00224083	0.23047	0.545011	3.65504e-07	3.82949e-05	chr4	139773135	+		OpenSea	TAATATTTCTTGAAGAAAAAAATAGCGTACAAAAGGGTTTGTGATGCCAACTCAATCAGT[CG]TGCTGTTGATGGAGAATTATTCAAGTGCAAGCCAGAACAGGCAAAAAAAATTTTCAGAGA	CGTGCTGTTGATGGAGAATTATTCAAGTGCAAGCCAGAACAGGCAAAAAA							TRUE				RP11-371F15.3;RP11-371F15.3	ENST00000511951.1;ENST00000507038.1	3'UTR;3'UTR	RP11-371F15.3;RP11-371F15.3	ENST00000511951.1;ENST00000507038.1	3'UTR;3'UTR	NA	TRUE
cg00226093	0.746915	0.482967	1.46658e-08	3.71488e-06	chr20	61611214	-	chr20:61612284-61612501	N_Shore	ATTTTGCATATTGATCAGTCCATACAGAGCAGTGACCGTGGGCAGCAAGTGGCTCAGGCT[CG]TCTTGTCCCTGGGCAAGCTGGGGCCTGGGAGAGGACAGACAGATGCTCAACACTCCAGCA	CGAGCCTGAGCCACTTGCTGCCCACGGTCACTGCTCTGTATGGACTGATC							TRUE										NA	NA
cg00230282	0.322185	0.664137	7.1003e-11	8.20967e-08	chr2	219331047	+		OpenSea	ATTTACCCTAATTTCATCTATAATTTGCTTAGGACATACAATTTCACCTTACTAGATCTA[CG]TCAGGGTTGATCAACCTAGAGCTATTGACATTTTGGGTGGGACAAGCTTTTGTTGGGGTG	CGTCAGGGTTGATCAACCTAGAGCTATTGACATTTTGGGTGGGACAAGCT	USP37	NM_020935	Body				NA		2:219330666-219331140	Gene_Associated_Cell_type_specific				USP37	ENST00000473554.1	3'UTR	NA	NA
cg00230342	0.63004	0.853913	1.83048e-06	0.000128403	chr9	131174026	+		OpenSea	TGGGTGGACCCCCAGAATGGGGGGAGCTGAGGGCAGATTCCTCGAGCAGAGACCAGGGTG[CG]CTAAGTCTAAGCAGAATGGGCAGAGATGCCTCCAGCTGGGCTTTGAGGGTGTCAGTCTTC	CCTCAAAGCCCAGCTGGAGGCATCTCTGCCCATTCTGCTTAGACTTAGCG	MIR1268A	NR_031672	Body				NA				CERCAM	ENST00000372842.1	TSS200	CERCAM;CERCAM;CERCAM	ENST00000420034.1;ENST00000463269.1;ENST00000372842.1	TSS200;TSS200;TSS200	NA	NA
cg00234384	0.530982	0.249053	1.87799e-05	0.000765482	chr5	54179570	-	chr5:54179363-54180171	Island	CTGCTCGTAGGAATACAGTCAGGAGGCCGACTTTAAAACTCCGATCCTCCGGGAAGGCCA[CG]CGGAGGTGAGGAACAGGTCCTGCCCTGGAGGCGCCAGCCGCACCGACCGGGAGATGGAAG	ATACAGTCAGGAGGCCGACTTTAAAACTCCGATCCTCCGGGAAGGCCACG						DMR	NA	5:54215121-54215999	5:54179231-54180227	Unclassified_Cell_type_specific							NA	TRUE
cg00237825	0.463219	0.85911	1.52799e-06	0.000112232	chr20	29844575	+		OpenSea	CCGCTGCCTGCATGTAGAAAGAGGAGAGTAAAACCGATGCACACTGGACTCACCCAAAGG[CG]GAAAAGGACAAGGAACCCAAAAAGGAAGATCCAGTGGGCCCACAGGCAGCCCTCCTAATG	TGCCTGTGGGCCCACTGGATCTTCCTTTTTGGGTTCCTTGTCCTTTTCCG	DEFB115	NM_001037730	TSS1500				NA				DEFB115	ENST00000400552.1	TSS1500	DEFB115	ENST00000400552.1	TSS1500	NA	TRUE
cg00238692	0.471498	0.694607	1.60217e-06	0.000116341	chr12	76448912	+		OpenSea	GAATAGGTTCATCGTGTTCCTTCAAATTAAAAAAATAATAAAAATGAATAACATGGCATT[CG]AGGACTGTGTTCTGTTACTACACAAACACCAGCTGACTGAGACATAATATATTTCAAAGT	CGAGGACTGTGTTCTGTTACTACACAAACACCAGCTGACTGAGACATAAT	NAP1L1;NAP1L1	NM_004537;NM_139207	Body;Body				NA										NA	TRUE
cg00239117	0.692857	0.877409	3.55216e-06	0.000212082	chr2	238928702	-		OpenSea	TCAGGCAAGTGTGGGGCAACTTCTAGGGGCCAGCATATGTCACTGGTGTCCCCAGCAGGG[CG]TCTCCAGGGGATCATTAGGGTGTAGTACTTGGCTGAACACAAAAGTAGTTGCATTTGCCA	CGCCCTGCTGGGGACACCAGTGACATATGCTGGCCCCTAGAAGTTGCCCC	UBE2F	NM_080678	Body				TRUE							UBE2F;UBE2F;UBE2F;UBE2F	ENST00000440223.1;ENST00000417231.1;ENST00000454786.1;ENST00000439338.1	3'UTR;3'UTR;3'UTR;3'UTR	NA	TRUE
cg00239952	0.523563	0.0903189	3.08949e-08	6.38583e-06	chr5	111754478	-	chr5:111754477-111756222	Island	TTAGAAACGTCAAACTCAACTTTGCTTTATGAAGGAACTCAAAGTTAACTCACCCTGGTA[CG]TCCACCCTCTCCCTGCGCGCAGGGGACAGCGGCCTCTCCTCCCCACCGCGCAGAGTCGCG	AACTCAACTTTGCTTTATGAAGGAACTCAAAGTTAACTCACCCTGGTACG	EPB41L4A;FLJ11235	NM_022140;NR_027706	Body;TSS1500			DMR	NA	5:111782377-111784178						EPB41L4A	ENST00000305368.4	3'UTR	NA	TRUE
cg00241041	0.459986	0.7461	1.7049e-06	0.000121655	chr4	59005143	+		OpenSea	AAGCCAAAGATACAGCTGATGAAATACAACCTTAGACAAGCTCCATCTGTCCCATTTAGA[CG]ATATACAGTGTCAGATCTCAGTAGCGGAAGTAATAACTGCAAGCTGCTCTCCAGGGCAGA	AGCAGCTTGCAGTTATTACTTCCGCTACTGAGATCTGACACTGTATATCG							NA										NA	NA
cg00241281	0.515961	0.285788	1.04453e-05	0.000485704	chr14	105779794	-	chr14:105780339-105782027	N_Shore	CTGGCCAAGGTCAGACAGACCCTCATGGCTCTCAGTGTACCACCTTAGAGGAGCCAGGGG[CG]CGTGGGAAACACAGAGTCCCTTGTTCTCTCCGAAGTGGGACCCTGACTTTAAGCAGTCGC	CGCCCCTGGCTCCTCTAAGGTGGTACACTGAGAGCCATGAGGGTCTGTCT	PACS2;PACS2	NM_015197;NM_001100913	TSS1500;TSS1500				NA	14:104850839-104851060			PACS2;PACS2;PACS2;BRF1;BRF1;BRF1;PACS2;BRF1	ENST00000325438.8;ENST00000458164.2;ENST00000547217.1;ENST00000327359.3;ENST00000440513.3;ENST00000546474.1;ENST00000430725.2;ENST00000546474.1	TSS1500;TSS1500;TSS1500;5'UTR;5'UTR;1stExon;5'UTR;5'UTR	PACS2;PACS2;PACS2;PACS2;BRF1;BRF1;BRF1;PACS2;BRF1	ENST00000325438.8;ENST00000458164.2;ENST00000547217.1;ENST00000548265.1;ENST00000327359.3;ENST00000440513.3;ENST00000546474.1;ENST00000430725.2;ENST00000546474.1	TSS1500;TSS1500;TSS1500;TSS1500;5'UTR;5'UTR;1stExon;5'UTR;5'UTR	NA	TRUE
cg00241731	0.354814	0.605784	2.54928e-07	2.9401e-05	chr4	156275195	+		OpenSea	AACCTTAATATTGGGGTAACATAATTTAGAGGTCAAAGTACTATCTACCTCACAGAGCTA[CG]AAAATCAAATGAGAAGGGGTATGGCACTGACCACAGCAGCATACTGCTATGAACGTGGTT	AGCAGTATGCTGCTGTGGTCAGTGCCATACCCCTTCTCATTTGATTTTCG	LOC102724776;MAP9	NR_125937;NM_001039580	TSS200;Body				NA		4:156274961-156275610	Unclassified	AC097467.2	ENST00000417474.1	TSS200	MAP9;MAP9;AC097467.2	ENST00000424373.1;ENST00000503466.1;ENST00000417474.1	3'UTR;TSS1500;TSS200	NA	NA
cg00242653	0.554289	0.707008	3.7054e-06	0.000219282	chr1	82857354	+		OpenSea	TATTTGAGTTTAAAATTTTCGTTTTCATGGGAGGAAAAAACTGTAATTTTTAAAAGAAGA[CG]TACCATGCAAATTGAATGAAGGATATAAAAGACTGATTTTAGAGGTGCTATTTTACAGTG	GCACCTCTAAAATCAGTCTTTTATATCCTTCATTCAATTTGCATGGTACG							NA										NA	NA
cg00247587	0.613121	0.502038	7.97084e-06	0.000395424	chr22	50524768	+	chr22:50528201-50529085	N_Shelf	AAACACTTTGCTCAACCTCACCCCCACAGGAAACAGCAGTGATAAATTTTTAGCAATAAA[CG]AAAGTTTAAGCTATACTAGTATTTTAGGGTTAGTTAATTTTGTGCCAGCCACCACAGCCA	CGAAAGTTTAAGCTATACTAGTATTTTAGGGTTAGTTAATTTTGTGCCAG	MLC1;MLC1	NM_139202;NM_015166	TSS1500;TSS1500				NA				MLC1;MLC1;MLC1;MLC1;MLC1;MLC1	ENST00000450140.2;ENST00000395876.2;ENST00000538737.1;ENST00000535444.1;ENST00000431262.2;ENST00000311597.5	TSS1500;TSS1500;TSS1500;TSS1500;TSS1500;TSS1500	MLC1;MLC1;MLC1;MLC1;MLC1;MLC1;MLC1	ENST00000450140.2;ENST00000395876.2;ENST00000442311.1;ENST00000538737.1;ENST00000535444.1;ENST00000431262.2;ENST00000311597.5	TSS1500;TSS1500;TSS1500;TSS1500;TSS1500;TSS1500;TSS1500	NA	NA
cg00249428	0.557511	0.746328	9.78625e-08	1.47759e-05	chr6	143850541	-		OpenSea	AGACAGATCCCAGCCCACATTTGGGCTCCTGCTGAAGGCAGTGTTCCTAGCACTGATGGG[CG]GAACAAGCTAGTTGATAAATTTTCATTTATTTCTTTTATAATCTTACATAAGTCATCACT	CGCCCATCAGTGCTAGGAACACTGCCTTCAGCAGGAGCCCAAATGTGGGC							NA										NA	NA
cg00251111	0.239626	0.404711	1.81158e-05	0.000744097	chr21	45725103	+		OpenSea	CCTCTGGGATCTCATTGGATTCCTGTAGTGTGGGGATGGTGGCAGATACTCTGGCTGCTA[CG]TGAGAACAGTGTGCCGATCCCTGGGGTTTCTCAAGGCGTGGCACCTCACCTCACACCTGC	CGTGAGAACAGTGTGCCGATCCCTGGGGTTTCTCAAGGCGTGGCACCTCA	PFKL;PFKL	NM_001002021;NM_002626	5'UTR;Body				NA		21:45723355-45725682	Promoter_Associated	PFKL;PFKL;PFKL;PFKL	ENST00000381188.3;ENST00000403390.1;ENST00000496824.1;ENST00000534847.1	5'UTR;TSS200;5'UTR;5'UTR	PFKL;PFKL;PFKL;PFKL;PFKL;PFKL;PFKL;PFKL	ENST00000381188.3;ENST00000403390.1;ENST00000491298.1;ENST00000496824.1;ENST00000534847.1;ENST00000491298.1;ENST00000466134.1;ENST00000397961.2	5'UTR;TSS200;1stExon;5'UTR;5'UTR;5'UTR;5'UTR;3'UTR	NA	NA
cg00259097	0.732694	0.873361	1.16228e-05	0.000527535	chr16	70770604	+		OpenSea	CCTTGGACCCTGGAGCTGAGGCCCTTAGTGGAAGGGAGGAGGAGGGCAGTGTCACAGCTG[CG]AGAAGCCGCAGCAAGCGATTCACATCCTCAGCTGAGTGCAGCTCAGCCCTCACAGTGCTC	GGCTGAGCTGCACTCAGCTGAGGATGTGAATCGCTTGCTGCGGCTTCTCG	VAC14	NM_018052	Body				TRUE							VAC14;VAC14;VAC14;VAC14;VAC14	ENST00000568886.1;ENST00000564685.1;ENST00000568548.1;ENST00000561879.1;ENST00000563662.1	3'UTR;3'UTR;3'UTR;3'UTR;3'UTR	NA	TRUE
cg00267012	0.606647	0.167878	2.01107e-07	2.48468e-05	chr8	69242940	-	chr8:69242920-69243803	Island	GTGCACTTTGAAAGAAGCACCTTCACCATTGGCTTTTTAAGCGGCGCTGTCGCTAGGGAG[CG]GCTGGTAGGGCGAGCAGCCTCGGGGAGCAGCCCGGGCTGTTTGTTCCGTCACCGGGGAAA	AGAAGCACCTTCACCATTGGCTTTTTAAGCGGCGCTGTCGCTAGGGAGCG	C8orf34;C8orf34;C8orf34-AS1	NM_001195639;NM_052958;NR_038877	TSS200;TSS200;Body				NA	8:69405364-69406465			C8orf34;C8orf34;C8orf34;C8orf34	ENST00000349492.3;ENST00000523686.1;ENST00000348340.2;ENST00000539993.1	TSS1500;TSS1500;TSS1500;TSS200	C8orf34;C8orf34;C8orf34;C8orf34	ENST00000349492.3;ENST00000523686.1;ENST00000348340.2;ENST00000539993.1	TSS1500;TSS1500;TSS1500;TSS200	NA	NA
cg00275665	0.185732	0.293037	2.27724e-06	0.0001515	chr20	48317973	-		OpenSea	TAAGTCAGAGCTGTGGGAGTCCAGCAGCTTTTACACGTTAGATTTTTCTATTTCCTCATT[CG]TCAGCATTTGACATCATTTTCTGATGTTATAAAGGATAACAGAAAAAAAAACCCTGTGCA	GTGGGAGTCCAGCAGCTTTTACACGTTAGATTTTTCTATTTCCTCATTCG	B4GALT5	NM_004776	Body		chr20:48317822-48317822		NA										NA	NA
cg00277291	0.361868	0.631558	2.83101e-10	2.27503e-07	chrX	154277397	-		OpenSea	TTCTTACCAAGCTGTAGATCATTTCCAGCACTTTTTGCAGCTTTCAGAGCCCAGCAGCAA[CG]CTTGCCAGTTTTCAGTTTATTCGGCTCCCTCTACTTGTTGTGCTGCAATGGAAGTAGGAT	TGTAGATCATTTCCAGCACTTTTTGCAGCTTTCAGAGCCCAGCAGCAACG	FUNDC2	NM_023934	Body				NA		X:154277362-154277627	Unclassified_Cell_type_specific	FUNDC2	ENST00000484175.1	5'UTR	FUNDC2;FUNDC2;FUNDC2;FUNDC2;FUNDC2;FUNDC2	ENST00000471528.1;ENST00000492303.1;ENST00000492303.1;ENST00000475165.1;ENST00000484175.1;ENST00000485289.1	5'UTR;1stExon;5'UTR;5'UTR;5'UTR;5'UTR	NA	NA
cg00280235	0.509658	0.682955	9.74833e-06	0.000460169	chr7	107797076	+		OpenSea	AGGTTCTATCCCTCTTTGCACTATGAAATATCATCTGGCTTAGAGCCAGCCATGTAGAAA[CG]GTTTCATCATCAAACTGGAGAATGAGCAAATCAGAAATGGAATTAATTTACACCTAGGCA	CGGTTTCATCATCAAACTGGAGAATGAGCAAATCAGAAATGGAATTAATT	NRCAM;NRCAM;NRCAM;NRCAM	NM_001037133;NM_001037133;NM_001037132;NM_005010	1stExon;5'UTR;Body;Body				NA				NRCAM;NRCAM	ENST00000522550.1;ENST00000522550.1	1stExon;3'UTR	NRCAM;NRCAM;NRCAM;NRCAM	ENST00000522550.1;ENST00000522550.1;ENST00000415105.1;ENST00000465585.1	1stExon;3'UTR;3'UTR;3'UTR	NA	TRUE
cg00280635	0.605991	0.772575	3.25571e-06	0.00019809	chr1	60279071	-	chr1:60280624-60281048	N_Shore	GTTTTAATTAAATCACATTACCAATGTACCTAGTTCCAGCATATAAAGTGACTCCAGAGG[CG]TTAAGAAAGTTCTGGAATAATGTTAAGGGAGTCAATAGCAAACGTACATACTGTATTTTT	CGCCTCTGGAGTCACTTTATATGCTGGAACTAGGTACATTGGTAATGTGA	HOOK1	NM_015888	TSS1500				NA				HOOK1	ENST00000371208.3	TSS1500	HOOK1;HOOK1	ENST00000455990.1;ENST00000371208.3	TSS1500;TSS1500	NA	NA
cg00285343	0.237478	0.580092	2.80168e-06	0.000176962	chr7	41733356	+		OpenSea	TCATCATAAAATGACTTTCATGCTGGTCTTGGCTGATAATTAACTGCATGGCATCGCCTG[CG]TATTGTAGAGAGGCAAGGGTGCTGATTTATGCATCCGTTTAATTATCTGAATTGAAAGAC	AGATAATTAAACGGATGCATAAATCAGCACCCTTGCCTCTCTACAATACG	LOC285954;LOC285954;INHBA	NR_027119;NR_027118;NM_002192	TSS200;TSS200;Body				NA		7:41732612-41733461	Unclassified	INHBA;AC005027.4;AC005027.4;AC005027.4;AC005027.3	ENST00000464515.1;ENST00000415848.2;ENST00000422822.1;ENST00000420821.1;ENST00000416150.1	TSS1500;TSS200;TSS200;TSS200;3'UTR	INHBA;AC005027.4;AC005027.4;AC005027.4;AC005027.3	ENST00000464515.1;ENST00000415848.2;ENST00000422822.1;ENST00000420821.1;ENST00000416150.1	TSS1500;TSS200;TSS200;TSS200;3'UTR	NA	TRUE
cg00287016	0.679523	0.845471	9.10512e-07	7.60431e-05	chr7	99691875	-		OpenSea	AGGATAGCCAGCAGGGTCCGGGCAGAAGTATAGGTGGCATCCTTACTAGCCCAAGCCTCT[CG]CCTCATCTCCACGTATGCTGCTGTGATGTAGTCAGCCAGAGACTCTGGCACCATGGGCTG	AGGGTCCGGGCAGAAGTATAGGTGGCATCCTTACTAGCCCAAGCCTCTCG	MIR25;MCM7;MCM7;MIR106B;MIR93	NR_029498;NM_005916;NM_182776;NR_029831;NR_029510	TSS1500;Body;Body;TSS200;TSS1500				NA				MIR25;MIR93;MIR106B	ENST00000384816.1;ENST00000385024.1;ENST00000385301.1	TSS1500;TSS1500;TSS200	MCM7;MCM7;MIR25;MIR93;MIR106B;MCM7;MCM7	ENST00000491245.2;ENST00000493352.1;ENST00000384816.1;ENST00000385024.1;ENST00000385301.1;ENST00000489841.1;ENST00000485286.1	3'UTR;3'UTR;TSS1500;TSS1500;TSS200;3'UTR;3'UTR	NA	TRUE
cg00288327	0.248011	0.0803878	5.66768e-06	0.000303922	chr7	27135566	-	chr7:27135342-27136736	Island	AAGGAGTTCATTCTTGCATTGTCCATCTGTCACTGAGTGACCTGGTCCTGCGAAGCCCGG[CG]TGACTGTGCCAACTTTCTCACTTCCTCCATGGGGCCGGAGAAGAAAAATGATATGAATGT	CGCCGGGCTTCGCAGGACCAGGTCACTCAGTGACAGATGGACAATGCAAG	HOXA1;HOXA1;HOXA1;HOXA1	NM_005522;NM_153620;NM_153620;NM_005522	5'UTR;1stExon;5'UTR;1stExon			DMR	NA	7:27101474-27103261	7:27135450-27135792	Promoter_Associated	HOTAIRM1;HOXA1;HOXA1;HOTAIRM1;HOTAIRM1;HOXA1;HOXA1;HOTAIRM1	ENST00000425358.2;ENST00000343060.4;ENST00000355633.5;ENST00000495032.1;ENST00000434063.3;ENST00000343060.4;ENST00000355633.5;ENST00000429611.3	TSS1500;1stExon;1stExon;5'UTR;TSS200;5'UTR;5'UTR;TSS200	HOTAIRM1;HOXA1;HOXA1;HOTAIRM1;HOTAIRM1;HOXA1;HOXA1;HOTAIRM1	ENST00000425358.2;ENST00000343060.4;ENST00000355633.5;ENST00000495032.1;ENST00000434063.3;ENST00000343060.4;ENST00000355633.5;ENST00000429611.3	TSS1500;1stExon;1stExon;5'UTR;TSS200;5'UTR;5'UTR;TSS200	NA	TRUE
cg00289546	0.25131	0.0583545	7.39119e-06	0.000372842	chr2	211089678	-	chr2:211089413-211090176	Island	ATTGGGGCTCCGGAATGAACTTCTGGAGAAATCTTTCGGCTTTCCCCGACGTGGGCTCGG[CG]GTCTGTTCTCGGGGCGGCACGGCTGACACCCCTTTTTCCTCCGCCCAGATGCTGGTTGCA	CGCCGAGCCCACGTCGGGGAAAGCCGAAAGATTTCTCCAGAAGTTCATTC	ACADL	NM_001608	Body			DMR	NA	2:210797659-210798527			AC006994.2	ENST00000412065.1	5'UTR	ACADL;ACADL;AC006994.2	ENST00000498120.1;ENST00000482523.1;ENST00000412065.1	3'UTR;TSS200;5'UTR	NA	TRUE
cg00293796	0.607938	0.883752	7.01558e-06	0.000357999	chr8	104166353	+		OpenSea	CATAGCAGTCAGGCTCACACTTTCTTGCTGGGGTGATAAGTGATGATGTACAAGCACAAA[CG]AACACAGCTACGACCTCATGGTGTGGCTTCCATTAATTGGGTGCTCAGCATGTGCCGGGC	CGAACACAGCTACGACCTCATGGTGTGGCTTCCATTAATTGGGTGCTCAG	MIR3151;BAALC;BAALC	NR_036106;NM_001024372;NM_024812	TSS1500;Body;Body				NA							BAALC	ENST00000519507.1	5'UTR	NA	NA
cg00294916	0.490101	0.211001	3.64317e-06	0.000216422	chr13	19113953	+		OpenSea	GTGCTGCTCTAAGTTTCTCCTCTAGTGGATGCCAAAAGAAAACATTCTTATCACTGTGTA[CG]TGCTAGGCATAATTGTTTTGATATGTGTTCAGCACAGGCTTAGGCAAAAGTCTTTCTATG	CGTGCTAGGCATAATTGTTTTGATATGTGTTCAGCACAGGCTTAGGCAAA							NA				LINC00349	ENST00000448748.1	TSS1500	LINC00349	ENST00000448748.1	TSS1500	NA	NA
cg00296018	0.466248	0.764039	9.32151e-08	1.42427e-05	chr5	141205206	-		OpenSea	AGACCTGCCCCTCCTTCAGAGGCAGCTTAGCCAGAAACGCCAGCGGCAGAGACAACTGTG[CG]GGTGGGGATGCTGAGCGCAGAGCCGGCAGAGCCCGCGGGCAGGCAGAGAAGCACCACACA	CCTTCAGAGGCAGCTTAGCCAGAAACGCCAGCGGCAGAGACAACTGTGCG							TRUE										NA	TRUE
cg00297584	0.295133	0.077176	3.9044e-06	0.000228655	chr12	116971031	+		OpenSea	GGAAAGCAGGTCCCTTGAACAGATTCTCCCAAAGCAGTGACTTTAGGAACATCTCGAAGG[CG]ACAGATTCCAGTTGTTAAGGCTACGATGAAATAGCAGAAGACTCTGGGAAGCAGCGTGCA	CCCAGAGTCTTCTGCTATTTCATCGTAGCCTTAACAACTGGAATCTGTCG	NCRNA00173;NCRNA00173	NR_027346;NR_027345	TSS1500;TSS200				NA		12:116970684-116972294	Unclassified	LINC00173;LINC00173;LINC00173	ENST00000470091.1;ENST00000489452.1;ENST00000480237.1	TSS1500;TSS1500;TSS200	LINC00173;LINC00173;LINC00173	ENST00000470091.1;ENST00000489452.1;ENST00000480237.1	TSS1500;TSS1500;TSS200	TRUE	TRUE
cg00297600	0.765659	0.867707	8.78354e-06	0.000425228	chr8	35401670	-		OpenSea	CCTCAGATGCACAGTGACACCCACCTTGGAGAGTTTCTGTGTCTCTTAAATGACCGAATC[CG]TGTAGAAGGCTTATTACCACAATCTGTAGCTACTTGGTAAACGGCAGCTCTTATTTTGAC	CGGATTCGGTCATTTAAGAGACACAGAAACTCTCCAAGGTGGGTGTCACT	UNC5D	NM_080872	Body				TRUE				UNC5D	ENST00000453357.2	TSS1500	UNC5D	ENST00000453357.2	TSS1500	TRUE	TRUE
cg00298218	0.531679	0.666355	1.77814e-06	0.000125548	chr1	83955790	+		OpenSea	GGAGACAAGTCTTTGCTCTGCACATAAACAAAAAATGCACTCCCTCCTGCCCAAATAGCA[CG]TAAAATTTCCACTGTGATAGACATGATCCTGTGTTTTCAGATGGATGACTACCATGTTCA	TCATCCATCTGAAAACACAGGATCATGTCTATCACAGTGGAAATTTTACG							NA										NA	NA
cg00308438	0.668112	0.806617	1.74434e-07	2.24035e-05	chr1	92329399	-		OpenSea	GCTGACTAAATTATAGAGATAATTTGGGAGCCATTAAACTGACTTATTATCCCTCTAAGT[CG]AACATTTCTGTCACCATAATTCCACATCAACTCTGATCATATGGAAATCTTCTCCGTTAA	CGACTTAGAGGGATAATAAGTCAGTTTAATGGCTCCCAAATTATCTCTAT	TGFBR3	NM_003243	5'UTR				TRUE				TGFBR3;TGFBR3;TGFBR3	ENST00000465892.2;ENST00000212355.4;ENST00000370399.2	5'UTR;5'UTR;5'UTR	TGFBR3;TGFBR3;TGFBR3;TGFBR3;TGFBR3;TGFBR3	ENST00000532540.1;ENST00000465892.2;ENST00000417833.2;ENST00000212355.4;ENST00000370399.2;ENST00000533370.1	5'UTR;5'UTR;5'UTR;5'UTR;5'UTR;3'UTR	NA	TRUE
cg00308440	0.387822	0.690187	2.00128e-06	0.000137499	chr7	14874108	+		OpenSea	ATGCTACTCCCTTGAAGTTAAATATGGTCATGTGAATTGCTTAGGCCAAAGAAATATTAG[CG]TATCACTTGCAGGGAGAAGGTATCAGAGCCAGCACACAGTCACGAGTGCTCTCTCTCTCT	CACTCGTGACTGTGTGCTGGCTCTGATACCTTCTCCCTGCAAGTGATACG	DGKB;DGKB	NM_145695;NM_004080	Body;Body				TRUE				DGKB	ENST00000403963.1	3'UTR	DGKB;DGKB;DGKB;DGKB	ENST00000467449.1;ENST00000463981.2;ENST00000403963.1;ENST00000477401.1	3'UTR;3'UTR;3'UTR;3'UTR	NA	TRUE
cg00308936	0.636484	0.797858	8.31249e-07	7.08041e-05	chr1	85883665	-		OpenSea	TTACATATATTTACATACCACATACCATTCTACTAACGATTACAAATCATAGTTGCTTTG[CG]GAAAGTCTGTAGGAAATGGTGGCAGAAGATAAGCTTTCAGACAGTTTGATTAGGATGGGC	CGCAAAGCAACTATGATTTGTAATCGTTAGTAGAATGGTATGTGGTATGT	DDAH1;DDAH1	NM_012137;NM_001134445	Body;5'UTR				TRUE				DDAH1;DDAH1	ENST00000483110.1;ENST00000535924.1	3'UTR;5'UTR	RP11-131L23.1;DDAH1;DDAH1;DDAH1	ENST00000426125.1;ENST00000483110.1;ENST00000474200.1;ENST00000535924.1	5'UTR;3'UTR;3'UTR;5'UTR	NA	TRUE
cg00312746	0.507745	0.742594	2.64643e-08	5.69511e-06	chr3	88237668	-		OpenSea	GAGGAATCTAAGAAGCACCAGGCTAAATCTTTCTGTGAAGTTCCTTTTGTTCCTGAATCA[CG]CTTCTCATGTTCTCTTTTGACTGACAGATCCACCACAAGAGACATCTATGACTGGGATGA	AAGCACCAGGCTAAATCTTTCTGTGAAGTTCCTTTTGTTCCTGAATCACG							NA										NA	NA
cg00314660	0.136488	0.377073	1.22304e-06	9.5071e-05	chr2	37312231	-	chr2:37311072-37311893	S_Shore	ATGCGACCACTTGCATTGCTATCACTCTGGTACGAGCCTCCATCATCTCTGCCAGGGTAT[CG]CCTTGTGAAGTTTATGCTTATCTTTGATGGAAATGGATAATGCTAAAGTATATTTTACCA	GCATTGCTATCACTCTGGTACGAGCCTCCATCATCTCTGCCAGGGTATCG	CCDC75;HEATR5B	NM_174931;NM_019024	5'UTR;TSS1500				NA		2:37310839-37312275	Promoter_Associated	CCDC75;CCDC75;HEATR5B	ENST00000409774.1;ENST00000281932.5;ENST00000233099.5	5'UTR;5'UTR;TSS1500	CCDC75;CCDC75;HEATR5B	ENST00000409774.1;ENST00000281932.5;ENST00000233099.5	5'UTR;5'UTR;TSS1500	NA	TRUE
cg00316279	0.444274	0.310181	3.73229e-06	0.000220628	chr17	77689156	-		OpenSea	ATAGCATGTCCTCTCCTCCGTATCAGGACACAGTAGACATCCAGGTGCCTATAAAATAGA[CG]TTTCTGGAGATAGCAGACCCTTGCAGGCTCTCCGGAAAGACTCTGTGATAACAGCCCTGG	CGTCTATTTTATAGGCACCTGGATGTCTACTGTGTCCTGATACGGAGGAG							NA										NA	NA
cg00317353	0.677402	0.816008	2.48086e-06	0.000161477	chr7	43908110	+	chr7:43908911-43909478	N_Shore	GGGGCTTACAAATAAATTTTAGTCAGTAGAAGAATCTGAAAATATGGAATTCATGAATAA[CG]AGGGTTGTCTGTATATATTTACAGAGAAAAATTTGTGCTTTAGTGGAAAACTGCATTCCT	CGAGGGTTGTCTGTATATATTTACAGAGAAAAATTTGTGCTTTAGTGGAA	URGCP-MRPS24;MRPS24	NM_001204871;NM_032014	3'UTR;Body				NA				MRPS24	ENST00000467084.1	3'UTR	MRPS24;MRPS24;MRPS24;MRPS24	ENST00000418740.1;ENST00000483330.1;ENST00000414932.1;ENST00000467084.1	3'UTR;3'UTR;3'UTR;3'UTR	NA	NA
cg00324128	0.443095	0.722776	3.18477e-09	1.29186e-06	chr2	166325614	+		OpenSea	TGTGAAATATTTGAATATTCTAATGCTCAGAATGAAATATTTTTCATACTGATTAGGCCT[CG]AAACTGCGTTTGAATGAAAACATTGTCAAACAGAGGTTGTAGTGCAAATAATATAAAACA	TTTGCACTACAACCTCTGTTTGACAATGTTTTCATTCAAACGCAGTTTCG							TRUE				CSRNP3;CSRNP3	ENST00000431452.2;ENST00000464503.1	TSS1500;TSS1500	CSRNP3;CSRNP3;CSRNP3	ENST00000421875.1;ENST00000409664.1;ENST00000464503.1	TSS1500;TSS1500;TSS1500	NA	TRUE
cg00331163	0.507779	0.694066	1.72028e-05	0.000713646	chr6	75808667	-		OpenSea	TACAGTGCCAAATGACCTCTGCCTGGAATGAGTCATCCTGCTACCCAGTTAGCATTCACT[CG]CAACAGCAGATCTCTGAAATCCAGCCGAGGATTTCTGAGTCAGGTCATTTTTTAGAGTTG	TGACCTCTGCCTGGAATGAGTCATCCTGCTACCCAGTTAGCATTCACTCG	COL12A1;COL12A1	NM_004370;NM_080645	Body;Body				NA				COL12A1	ENST00000511023.1	3'UTR	COL12A1	ENST00000511023.1	3'UTR	NA	NA
cg00331237	0.650309	0.254464	5.82961e-08	1.01051e-05	chr12	77273319	-	chr12:77272632-77273216	S_Shore	CCACCTCCCCCTTGCCTTGTCCTTGTCAGTAAACTCAACGTGATTAACTTCCCTAGTTAA[CG]CATATTCTCTCGTCCGATTTCCAGCTTCTGGGAATCCACAACTTCTTATTCTTAAAGAGC	TGCCTTGTCCTTGTCAGTAAACTCAACGTGATTAACTTCCCTAGTTAACG	CSRP2	NM_001321	TSS1500				NA		12:77272045-77273609	Unclassified	RP11-461F16.3;CSRP2;CSRP2;CSRP2;CSRP2	ENST00000552426.1;ENST00000547435.1;ENST00000552330.1;ENST00000546966.1;ENST00000311083.5	5'UTR;TSS1500;TSS1500;TSS1500;TSS1500	RP11-461F16.3;CSRP2;CSRP2;CSRP2;CSRP2;CSRP2;CSRP2	ENST00000552426.1;ENST00000551725.1;ENST00000547435.1;ENST00000552330.1;ENST00000547557.1;ENST00000546966.1;ENST00000311083.5	5'UTR;TSS1500;TSS1500;TSS1500;TSS1500;TSS1500;TSS1500	TRUE	TRUE
cg00333154	0.237573	0.0436003	1.35071e-07	1.85863e-05	chr6	106808703	-	chr6:106808487-106809171	Island	CCCGCATCCGCGACGAGGGGGCGGGGTCCCACGGCGCGCTGAGAAAGGCGGGCGAGCTGG[CG]CTCAGGTGTGTTCTTCCATAGGGCCCGGGCGGCAGAGAGGACCGCGTCCCGGCAGTCGGA	CGCCAGCTCGCCCGCCTTTCTCAGCGCGCCGTGGGACCCCGCCCCCTCGT							TRUE	6:106914782-106915883	6:106807691-106809559	Unclassified	RP11-404H14.1;AIM1	ENST00000449180.1;ENST00000285105.5	TSS1500;TSS200	RP11-404H14.1;AIM1	ENST00000449180.1;ENST00000285105.5	TSS1500;TSS200	NA	TRUE
cg00334411	0.678695	0.788072	4.73164e-08	8.68055e-06	chr1	63836060	-	chr1:63833109-63833821	S_Shelf	GATAAATTGTTTATTGGAAGACTTTCCCAAACTAAATACAAAGACAAGATTCCTCTTTCT[CG]CTGTACCAAAGATAAATCATGCCTTTGTCTACGGTTGTGGTTTTATATTTACCTGTAGGT	ATTGGAAGACTTTCCCAAACTAAATACAAAGACAAGATTCCTCTTTCTCG	ALG6	NM_013339	5'UTR				NA				ALG6;ALG6	ENST00000371108.4;ENST00000263440.4	5'UTR;TSS1500	ALG6;ALG6;ALG6	ENST00000371108.4;ENST00000263440.4;ENST00000487136.1	5'UTR;TSS1500;5'UTR	NA	NA
cg00334968	0.572797	0.71006	1.38773e-07	1.89648e-05	chr1	78841094	+		OpenSea	TTATGCCACAAGCCATTAAAGACAGGAAACATGTCTCACCTGCAGTAGGTATTTGAGAAA[CG]TTTCTCAAGTTAATAAGCAGTAAACCTATAATGGAGAAAATTTGTTGAGGTGGCTACTAA	CGTTTCTCAAGTTAATAAGCAGTAAACCTATAATGGAGAAAATTTGTTGA							NA				RN5S23;PTGFR	ENST00000391006.1;ENST00000370758.1	TSS200;5'UTR	RN5S23;PTGFR	ENST00000391006.1;ENST00000370758.1	TSS200;5'UTR	NA	NA
cg00338685	0.849279	0.662733	9.69055e-06	0.000458289	chr8	144883443	-	chr8:144885269-144886103	N_Shore	GCTATGCATCCAGTTACTTGCAAAGCAGTTCCAGGGCTGGGCATGGGGACATGGCTTGAG[CG]CAGGAGGCGGAGGCTGCAGTGAGCTGTGATTGTGTCACCACACTCCAGCCTAGGCGACAA	GTTACTTGCAAAGCAGTTCCAGGGCTGGGCATGGGGACATGGCTTGAGCG	SCRIB;SCRIB	NM_015356;NM_182706	Body;Body				NA										NA	TRUE
cg00340584	0.765783	0.661043	4.53038e-06	0.000255926	chr1	149512963	+	chr1:149514271-149514592	N_Shore	TTGTGGAGGAACTGACACCCGCTGGAGAAAGTGTGGAGGGAAGCGAGGGCTGCACCTGCA[CG]CAGGATCTGAGGCAAGCGGCTGTTCCCAGCTCTCAGTGCAAAAGACATTTGTCATCTGAG	CGCAGGATCTGAGGCAAGCGGCTGTTCCCAGCTCTCAGTGCAAAAGACAT							NA										NA	TRUE
cg00340856	0.487436	0.65737	3.29403e-09	1.32774e-06	chr19	40580298	-		OpenSea	TCCTCCACTCCTTGCATACAAAGAGTTTCTCACTGGAATGAATTTTCTGATGCTGAATAA[CG]TTTGAACCACAAATGAAGCCTTTCCCACACCCCTTACATTCACATGGTTTTACACCAGCA	TGCATACAAAGAGTTTCTCACTGGAATGAATTTTCTGATGCTGAATAACG	ZNF780A;ZNF780A;ZNF780A;ZNF780A	NM_001142578;NM_001010880;NM_001142579;NM_001142577	3'UTR;3'UTR;Body;3'UTR				NA				ZNF780A;ZNF780A	ENST00000450241.2;ENST00000455521.1	3'UTR;3'UTR	ZNF780A;ZNF780A	ENST00000450241.2;ENST00000455521.1	3'UTR;3'UTR	NA	TRUE
cg00342530	0.263292	0.642739	2.82342e-07	3.17227e-05	chr9	130027020	+		OpenSea	GATTCCAAATGACTAAATATTTAATTGAATCATTGCCTATACTTCCAGGGATGACTCTGG[CG]TTTGCTTTTTATTGAGGGCTCCATGAAAGCCAGGCTCTGCAATGGCTGCTGGGGACTGTG	CAGCCATTGCAGAGCCTGGCTTTCATGGAGCCCTCAATAAAAAGCAAACG	GARNL3;GARNL3	NM_032293;NM_032293	1stExon;5'UTR				TRUE				GARNL3;GARNL3;GARNL3;GARNL3	ENST00000314904.5;ENST00000314904.5;ENST00000373387.4;ENST00000373387.4	5'UTR;1stExon;5'UTR;1stExon	GARNL3;GARNL3;GARNL3;GARNL3;GARNL3;GARNL3;GARNL3;GARNL3;GARNL3;GARNL3;GARNL3;GARNL3;GARNL3	ENST00000314904.5;ENST00000314904.5;ENST00000487565.1;ENST00000373387.4;ENST00000373387.4;ENST00000485331.1;ENST00000373386.2;ENST00000498801.1;ENST00000487565.1;ENST00000485331.1;ENST00000453030.1;ENST00000441134.1;ENST00000478702.1	5'UTR;1stExon;1stExon;5'UTR;1stExon;1stExon;TSS200;5'UTR;5'UTR;5'UTR;3'UTR;3'UTR;5'UTR	TRUE	TRUE
cg00346247	0.592088	0.127606	1.3132e-08	3.42004e-06	chr6	29716851	+	chr6:29716468-29717158	Island	CCCAGCGGAGCCGCGAAGGCCCACCAGAAATTTCCTGTCACCTGGCCCCACCCCAGCGAC[CG]CTCACCCAATGAAAACTGGCGCCCGCAGCTTAGGGCCAATCACGAGCTGGGAGGGCGGGG	AGCTCGTGATTGGCCCTAAGCTGCGGGCGCCAGTTTTCATTGGGTGAGCG	LOC285830;LOC285830	NR_026972;NR_026973	TSS200;TSS200	high-CpG:29824748-29824835		DMR	NA	6:29824265-29825168	6:29716684-29717232	Promoter_Associated	Y_RNA;HLA-F-AS1	ENST00000362420.1;ENST00000458236.1	TSS1500;TSS200	Y_RNA;HLA-F-AS1;HLA-F-AS1	ENST00000362420.1;ENST00000458236.1;ENST00000399247.2	TSS1500;TSS200;TSS200	NA	TRUE
cg00346326	0.295394	0.152702	7.2161e-06	0.000365865	chr13	28394537	-		OpenSea	GCTTCATCTTCCCCTTCTCTTGATGATGCTCTTCAGCCATTAGGGTTTCAAAAGAGTGGG[CG]TGAGCAAGCGAGAAAAGCCCCTTCAATTCTGGGAAACTTAAAGACAGTTTCTTCCAGCAG	CGCCCACTCTTTTGAAACCCTAATGGCTGAAGAGCATCATCAAGAGAAGG						DMR	NA										NA	TRUE
cg00347620	0.719203	0.443775	4.98103e-07	4.8177e-05	chr12	115109730	-	chr12:115109503-115110061	Island	GTCCGGCTTGGCTTCCAAGCCGCTAACCAACCGCTGGATGCTCTGCAGTTCGCTGGTGGC[CG]CCTCTTTCTCCGCGCAGAGTTTGGGCGACAAGGACATGGAGCTGGAGGAGAGCGTGGAGG	CGGCCACCAGCGAACTGCAGAGCATCCAGCGGTTGGTTAGCGGCTTGGAA	TBX3;TBX3	NM_005996;NM_016569	Body;Body				NA	12:113593887-113594434	12:115109600-115109972	Unclassified_Cell_type_specific							NA	TRUE
cg00352652	0.303049	0.785502	3.41023e-08	6.87706e-06	chr16	88547533	-		OpenSea	CAATCAAATAGCTATTATGTTTTCATTTCCATTTCGGCGTCCGGCTTAATGAGCAGGAGA[CG]GATGGGCGCACGGGTGTCTGCTGGCTGTGATAACCAAGGGGCTCCGGGCACCACAGGGGC	TATTATGTTTTCATTTCCATTTCGGCGTCCGGCTTAATGAGCAGGAGACG	ZFPM1	NM_153813	Body				NA	16:87075034-87075081			ZFPM1	ENST00000569086.1	5'UTR	ZFPM1;ZFPM1;ZFPM1;ZFPM1	ENST00000562417.1;ENST00000569086.1;ENST00000563351.1;ENST00000562437.1	5'UTR;5'UTR;5'UTR;5'UTR	NA	TRUE
cg00352957	0.607264	0.747323	1.74077e-08	4.18039e-06	chr1	100951744	-		OpenSea	AGTACAAGTAAATAGGGCTTTGAGTTATGAACTCTGAAAAGACAAACATAAAGTTAATCC[CG]TTATCTGAGAAACATATTTACCTTGCAGGAACATAGTACTTTCTATATCATAATCTTGAT	CGGGATTAACTTTATGTTTGTCTTTTCAGAGTTCATAACTCAAAGCCCTA	CDC14A;CDC14A	NM_033312;NM_003672	Body;Body				NA				RP5-837M10.4;CDC14A	ENST00000432210.1;ENST00000370125.2	TSS200;3'UTR	RP5-837M10.4;CDC14A	ENST00000432210.1;ENST00000370125.2	TSS200;3'UTR	NA	NA
cg00353659	0.618889	0.739521	4.22787e-07	4.26239e-05	chr1	7602013	+		OpenSea	GCCAACAAGATAAGTCCATGAAGTCACCAGCACCGTCCATGTTTCTCACTGCTTCCTCGG[CG]TTCCTCCAGAACCAAGCGTTACACCCCAACACAGGATGTGTGCCATAAATACTGGTTGCA	TTATGGCACACATCCTGTGTTGGGGTGTAACGCTTGGTTCTGGAGGAACG	CAMTA1	NM_015215	Body				NA										NA	TRUE
cg00354693	0.457823	0.672652	7.02531e-06	0.000358295	chrX	18307705	-		OpenSea	AAAATCTACGTAAATACTCAAGTGTTTATTCAGAAGCCTTCTAGTGGGACTAACACACCT[CG]AACTTTTTACAACCTTAGTTATATGCACCTCTGCCACTTTTGACCTACTGTTACACAGAA	CGAGGTGTGTTAGTCCCACTAGAAGGCTTCTGAATAAACACTTGAGTATT	SCML2;SCML2	NR_033717;NM_006089	Body;Body				TRUE				SCML2	ENST00000398048.3	TSS1500	SCML2	ENST00000398048.3	TSS1500	NA	NA
cg00354790	0.73937	0.84859	3.74502e-06	0.000221134	chr19	30444615	+		OpenSea	CTGAGTGATTCCATAATTCTTCCATTTTCTCATTTTCTTATTAGTTTTTTTTTTTTAGAG[CG]TAGTTAGGAATAGTTGATCATAAAATAATTACTAAGGTGATGATGAAATGGCAAGATGCA	TTTCATCATCACCTTAGTAATTATTTTATGATCAACTATTCCTAACTACG	URI1;URI1;URI1	NM_001252641;NR_045557;NM_003796	Body;Body;Body				NA				URI1	ENST00000392271.1	5'UTR	URI1;URI1;URI1	ENST00000570564.1;ENST00000574233.1;ENST00000392271.1	5'UTR;5'UTR;5'UTR	NA	NA
cg00355212	0.382386	0.0765986	1.5088e-05	0.000646205	chr12	14720529	+	chr12:14720248-14721093	Island	CTAGGAGCCTCCCCGGGCGCCCCCCGCCCAGGGCGCGCTCTGCTCACCTGCAGGTTTCGG[CG]GCTCCGCGGTGACTAACAACAGCGGCAGCAGCAGCAGCAGCAGCAGAAGCGGTGGCGGCT	TTCTGCTGCTGCTGCTGCTGCTGCCGCTGTTGTTAGTCACCGCGGAGCCG	PLBD1-AS1;PLBD1	NR_120465;NM_024829	TSS200;1stExon				NA	12:14611516-14612398			RP11-695J4.2;RP11-695J4.2;PLBD1	ENST00000542401.1;ENST00000545424.1;ENST00000240617.5	TSS1500;TSS200;1stExon	RP11-695J4.2;RP11-695J4.2;PLBD1;PLBD1	ENST00000542401.1;ENST00000545424.1;ENST00000541618.1;ENST00000240617.5	TSS1500;TSS200;1stExon;1stExon	NA	NA
cg00355217	0.297048	0.656177	5.67726e-10	3.66277e-07	chr8	81571973	+		OpenSea	AGGGGGTGTGGCCTGTCAAATAAAAAACAGAGAAAGCTGTTATGAAGGAATATTTTCCTT[CG]GAGCTTTAAGCTCTTATTACCAAAGGAGGACCTCAGAAATGGTCTCAGCTATATTAATAA	CGGAGCTTTAAGCTCTTATTACCAAAGGAGGACCTCAGAAATGGTCTCAG	ZNF704	NM_001033723	Body				NA							ZNF704	ENST00000517986.1	TSS200	NA	NA
cg00355281	0.208435	0.0826971	2.47763e-06	0.000161283	chr7	24323767	+	chr7:24323558-24325080	Island	GCGGGAAGTGGCGGGTGGGAGTCACCCAAGCGTGACTGCCCGAGGCCCCTCCTGCCGCGG[CG]AGGAAGCTCCATAAAAGCCCTGTCGCGACCCGCTCTCTGCACCCCATCCGCTGGCTCTCA	GATGGGGTGCAGAGAGCGGGTCGCGACAGGGCTTTTATGGAGCTTCCTCG	NPY	NM_000905	TSS200				NA	7:24289581-24291599			NPY;NPY;NPY	ENST00000405982.1;ENST00000242152.2;ENST00000407573.1	TSS1500;TSS200;TSS200	NPY;NPY;NPY	ENST00000405982.1;ENST00000242152.2;ENST00000407573.1	TSS1500;TSS200;TSS200	NA	TRUE
cg00355389	0.693824	0.3381	8.42005e-09	2.53184e-06	chr3	139653431	-	chr3:139653430-139655115	Island	CCTCAGCAGGCCCAGCACCCCAAGTTTTCTGATCTAGCTGTTCTATCAGCCTCTAAGAGC[CG]CGGCTGCCCCTGCTTCTCGGAGATGACGCGGAGCCCTGCCATTGCCATCCAGGTCCAAGG	CAGCACCCCAAGTTTTCTGATCTAGCTGTTCTATCAGCCTCTAAGAGCCG	CLSTN2	NM_022131	TSS1500			CDMR	NA	3:141136121-141137805	3:139653383-139653703	Unclassified_Cell_type_specific	CLSTN2	ENST00000458420.2	TSS1500	CLSTN2;CLSTN2	ENST00000458420.2;ENST00000511524.1	TSS1500;TSS1500	NA	TRUE
cg00357354	0.578855	0.742231	1.24718e-07	1.75903e-05	chr1	44193065	+		OpenSea	GCTATAAGATGATGAGCAAAACCAGACACAATTTCAGCCCTGGAAGGAGAAAAGGGAGGT[CG]ATATTAATCAAGTAATAACATTAATGGGGGCATTTCTCAAGTGAGAGAAGTGCACTAAGG	TCTCTCACTTGAGAAATGCCCCCATTAATGTTATTACTTGATTAATATCG	LOC101929592;ST3GAL3;ST3GAL3;ST3GAL3;ST3GAL3;ST3GAL3;ST3GAL3;ST3GAL3;ST3GAL3;ST3GAL3;ST3GAL3;ST3GAL3;ST3GAL3;ST3GAL3;ST3GAL3;ST3GAL3;ST3GAL3;ST3GAL3;ST3GAL3;ST3GAL3;ST3GAL3;ST3GAL3;ST3GAL3;ST3GAL3;ST3GAL3;ST3GAL3	NR_125986;NM_174968;NM_174967;NM_174966;NM_174965;NM_174964;NM_174963;NM_006279;NM_001270459;NM_001270460;NM_001270461;NM_001270462;NM_001270463;NM_001270464;NM_001270465;NM_001270466;NM_174971;NM_174970;NM_174969;NR_073019;NR_073017;NR_073018;NR_073023;NR_073016;NR_073020;NR_073021	TSS200;5'UTR;5'UTR;5'UTR;5'UTR;5'UTR;5'UTR;5'UTR;5'UTR;5'UTR;5'UTR;5'UTR;5'UTR;5'UTR;5'UTR;5'UTR;5'UTR;5'UTR;5'UTR;Body;Body;Body;Body;Body;Body;Body				NA				RP11-184I16.4;ST3GAL3;ST3GAL3	ENST00000437753.1;ENST00000545417.1;ENST00000347631.2	TSS200;5'UTR;5'UTR	RP11-184I16.4;ST3GAL3;ST3GAL3;ST3GAL3;ST3GAL3;ST3GAL3;ST3GAL3;ST3GAL3	ENST00000437753.1;ENST00000532911.1;ENST00000489897.1;ENST00000530154.1;ENST00000479383.1;ENST00000347631.2;ENST00000484868.1;ENST00000461066.2	TSS200;5'UTR;5'UTR;5'UTR;5'UTR;5'UTR;5'UTR;5'UTR	NA	NA
cg00357598	0.355998	0.759138	1.24147e-05	0.000555709	chr5	13946505	-		OpenSea	AAACCGGGAAGCCTTCCAGTCTGTGTGGCTGAATTTCAACCCCTCGGGCAAGGTAGATGG[CG]TCTTAAGGTATCTTCTTGAGCGCTCAGGCTCACTGGAAGTTGTTGAACAACACAAACAAA	CGCCATCTACCTTGCCCGAGGGGTTGAAATTCAGCCACACAGACTGGAAG							NA										NA	NA
cg00358278	0.356241	0.55127	9.57151e-07	7.89258e-05	chr16	88594506	+	chr16:88598447-88599162	N_Shelf	CACTCTGGTGCAGGGTCACCAAGCCGGTGCCTGCGGGGGGACTCCTGAGCGTGCTCCTCA[CG]GCCGAGCCCCACAGCACCCCCGGCCACCCTGTGAAGAAGGAGCCAGCAGAGCCCACGTGC	CGGCCGAGCCCCACAGCACCCCCGGCCACCCTGTGAAGAAGGAGCCAGCA	ZFPM1	NM_153813	Body				NA				RP11-21B21.4	ENST00000563243.1	3'UTR	RP11-21B21.4	ENST00000563243.1	3'UTR	NA	TRUE
cg00358442	0.48083	0.169496	3.71457e-08	7.2894e-06	chr7	89747958	+	chr7:89747892-89749036	Island	TCCCGTGCCAAGGAAGTCGCGTCAACCTGAGGCTCTGGGATCAGACCCACCGGACTCACG[CG]GGCTCTGCCACGTGTTGCCCGCAGTCTCGGCCCGTTCCCTCCGCTTTGGTAACGGGCACT	CGGGCTCTGCCACGTGTTGCCCGCAGTCTCGGCCCGTTCCCTCCGCTTTG	DPY19L2P4	NR_003551	TSS1500			DMR	NA	7:89585829-89586036			DPY19L2P4;STEAP2-AS1	ENST00000497063.1;ENST00000478318.2	TSS1500;3'UTR	DPY19L2P4;STEAP2-AS1	ENST00000497063.1;ENST00000478318.2	TSS1500;3'UTR	NA	TRUE
cg00359599	0.289475	0.698047	1.25699e-05	0.000560755	chr10	7770859	+		OpenSea	AGGCAAAAACAATGGCAGTCAGAGCTTTAGAAAGCCAGAGAGCAACCATCTTATTAATAA[CG]AGACTAGAATGAGCCAGTGTTATGTATTTGTTGTAGAGCCAATGTTTTCTCCCTCAGATC	CGAGACTAGAATGAGCCAGTGTTATGTATTTGTTGTAGAGCCAATGTTTT	ITIH2	NM_002216	Body				NA							ITIH2	ENST00000477751.1	TSS1500	NA	NA
cg00360721	0.742527	0.852781	7.2597e-07	6.40746e-05	chr14	50170842	+		OpenSea	CCCACCAGCCATTTCCTTGCCCCATATCCTTGGCAACACATTTGGTACCATCTGGCCTTA[CG]TTTTTGCCGTTCCAGTGAGTGTGACATGATAGTTCATTGTGGTTTTTGTTTTCATTTCCC	CAAAAACCACAATGAACTATCATGTCACACTCACTGGAACGGCAAAAACG	KLHDC1	NM_172193	Body				NA							KLHDC1	ENST00000555704.1	3'UTR	NA	NA
cg00365470	0.340381	0.0285636	4.3629e-07	4.36405e-05	chr7	22893924	-	chr7:22893794-22894577	Island	CAGTGCCCTCCCTTTTCGGCCGCGGCGCGTGACTGGGTAAGTGGGCTCGGACCTTCTGGA[CG]CAGGAGCCGACCACGTGGCTCCGGGGCTACCCCGTGCGCTTCCTAGGCGCGCCTCTCGCT	TTTTCGGCCGCGGCGCGTGACTGGGTAAGTGGGCTCGGACCTTCTGGACG				high-CpG:22860219-22860644			NA	7:22859917-22860741	7:22893185-22894150	Promoter_Associated							NA	TRUE
cg00366814	0.241145	0.10775	6.69397e-06	0.000344925	chr2	75061219	+	chr2:75060879-75062664	Island	CGGTCCGTGGGCGCACACACCCTCCCCGCGCAGCCAATGGGCGTGCGCACGTCACTGATC[CG]GAGGCCCGCGGGCCGGCAGCCCCTCAATAAGCCACATTGTTGCATGAAACTCCGGCGCAG	CGGAGGCCCGCGGGCCGGCAGCCCCTCAATAAGCCACATTGTTGCATGAA	HK2;HK2	NM_000189;NM_000189	1stExon;5'UTR	high-CpG:74914698-74914795			NA	2:74914290-74916044	2:75060967-75061388	Promoter_Associated	HK2;HK2;HK2;HK2	ENST00000409174.1;ENST00000535740.1;ENST00000290573.2;ENST00000290573.2	TSS1500;TSS200;5'UTR;1stExon	HK2;HK2;HK2;HK2	ENST00000409174.1;ENST00000535740.1;ENST00000290573.2;ENST00000290573.2	TSS1500;TSS200;5'UTR;1stExon	NA	TRUE
cg00369438	0.195076	0.0618294	1.22143e-05	0.000548111	chr19	41076542	+	chr19:41073494-41074151	S_Shelf	TGGTGAGGGCGGGGGAAGCCGGCGCTCGCGCTCCGCCCCGGCCCAGGGCGGCTCCGCCCC[CG]CGCCTCCGCCACCGCCCACTCACACAGTGCAGCACGAGGGCTTCCTACTGCGCAAGCGCG	GTAGGAAGCCCTCGTGCTGCACTGTGTGAGTGGGCGGTGGCGGAGGCGCG	SPTBN4	NM_020971	Body				NA	19:45768229-45768481	19:41076406-41077034	Unclassified							NA	TRUE
cg00371920	0.492671	0.0746958	3.14485e-08	6.4751e-06	chr2	161263848	+	chr2:161263871-161264460	N_Shore	GGGCGGCGGCGGCGAGGGCATCTCCCCTGCTCAGGTCGCCGGCCGAGCAGTCCCCGCGGC[CG]CCTTCCTGGGAAACAAGGTCACCGCCCAGCCGGTCCCTCCGAGGAGGCGCGGAGCCCCTG	GCCTCCTCGGAGGGACCGGCTGGGCGGTGACCTTGTTTCCCAGGAAGGCG	RBMS1;RBMS1	NM_002897;NM_016836	Body;Body			DMR	NA	2:160971758-160973170	2:161263055-161264788	Promoter_Associated	RBMS1;RBMS1;RBMS1;RBMS1	ENST00000409972.1;ENST00000409075.1;ENST00000409289.2;ENST00000474820.1	5'UTR;5'UTR;5'UTR;3'UTR	RBMS1;RBMS1;RBMS1;RBMS1;RBMS1;RBMS1	ENST00000477486.1;ENST00000409972.1;ENST00000409075.1;ENST00000409289.2;ENST00000474820.1;ENST00000491781.1	3'UTR;5'UTR;5'UTR;5'UTR;3'UTR;3'UTR	NA	TRUE
cg00372369	0.546046	0.21305	1.73094e-08	4.16305e-06	chr6	157169669	-		OpenSea	ATGAAGTATCTACCCACTTTTATCAGCTTTCCCAAATGTTATCTTTTAATGTCTTCATCA[CG]ATTAGAACACCCATTAGTAATTAGGATAACTCAGGAAAAGGATCTTCCATGTGGACCACC	CGTGATGAAGACATTAAAAGATAACATTTGGGAAAGCTGATAAAAGTGGG	ARID1B;ARID1B	NM_020732;NM_017519	Body;Body				TRUE				ARID1B;ARID1B	ENST00000354354.3;ENST00000535255.1	5'UTR;5'UTR	ARID1B;ARID1B;ARID1B	ENST00000354354.3;ENST00000535255.1;ENST00000494260.1	5'UTR;5'UTR;5'UTR	NA	NA
cg00378730	0.296981	0.120779	1.94679e-05	0.00078694	chr10	50822650	-	chr10:50822350-50822666	Island	TATCCAGGGACAGCACCGGGGCCGAGAGGCCCCAGGACTCGTGGAGTCCTCTGAGTCCTG[CG]CAGCAGCGGCCGTCGGGGGTCAGCTAGGAAGCTGCAGGATTGCGTTGCTTCGGTGCCTGG	GCACCGGGGCCGAGAGGCCCCAGGACTCGTGGAGTCCTCTGAGTCCTGCG	CHAT;CHAT;CHAT;CHAT;CHAT;CHAT;CHAT	NM_020549;NM_001142929;NM_020985;NM_020984;NM_020986;NM_001142934;NM_001142933	Body;5'UTR;5'UTR;5'UTR;5'UTR;5'UTR;5'UTR				TRUE	10:50492357-50492809			CHAT;CHAT;CHAT;CHAT;CHAT	ENST00000339797.1;ENST00000395559.2;ENST00000395562.2;ENST00000455728.2;ENST00000466590.1	5'UTR;5'UTR;5'UTR;5'UTR;5'UTR	CHAT;CHAT;CHAT;CHAT;CHAT;CHAT;CHAT;CHAT	ENST00000339797.1;ENST00000395559.2;ENST00000460699.1;ENST00000497767.1;ENST00000395562.2;ENST00000490270.1;ENST00000455728.2;ENST00000466590.1	5'UTR;5'UTR;5'UTR;5'UTR;5'UTR;TSS1500;5'UTR;5'UTR	NA	TRUE
cg00379249	0.901531	0.781054	2.18534e-06	0.000146964	chr7	98103964	+	chr7:98099882-98100289	S_Shelf	ATATAGAGAGTCATGTGTTGCTTAATGACAAGGATACTTTCTGAGAAATGCATTGTTAGG[CG]ATTTCATGGTTGTGTGAAATCACAGAGCGTGTTGCTGCAAACCTAGGTGGTGTGGCCTAC	ACCTAGGTTTGCAGCAACACGCTCTGTGATTTCACACAACCATGAAATCG							NA										NA	NA
cg00381091	0.509873	0.697144	2.60352e-05	0.000985481	chr20	2516531	+		OpenSea	AAAGCTGCTGAGGGAGGGGGCGGGGGCTGAGCGGGAACATTCATCTGTGTGGGCTCAGGA[CG]CCTGCAGCAGGATCCACAGTGCAGGCTCCCAGGGCCTGGCACAGACTGACTGATTCCAAC	CGCCTGCAGCAGGATCCACAGTGCAGGCTCCCAGGGCCTGGCACAGACTG	TMC2	NM_080751	TSS1500				NA				TMC2	ENST00000358864.1	TSS1500	TMC2	ENST00000358864.1	TSS1500	NA	NA
cg00383321	0.389801	0.652443	1.25244e-07	1.76606e-05	chr7	79707732	+		OpenSea	TATCTGCCTATGGAACCACTTAGAGGAGACAAATGGAGCTTGGAGGAGACATGTGATAGA[CG]TGTAAATTTGAGGGCAGCTGTTGAAGATAATAATTTTCGGAGACAGAAGAGTCAAAGAAG	TTCTGTCTCCGAAAATTATTATCTTCAACAGCTGCCCTCAAATTTACACG							NA										NA	NA
cg00385421	0.428479	0.532231	2.55097e-06	0.00016498	chr1	9996516	+		OpenSea	AAAGCACTGCAAAGAACACTACAGGGGAATGCAGAATCATCACACATGGGCCTGCATCCA[CG]GAGCTAGCTGCAGAAAAAACGCCAGTTTCCAGCATAACAACATACAATTAAACTCTTACC	CGGAGCTAGCTGCAGAAAAAACGCCAGTTTCCAGCATAACAACATACAAT	LZIC	NM_032368	Body				NA				LZIC	ENST00000488540.1	TSS1500	LZIC;LZIC	ENST00000488540.1;ENST00000486804.1	TSS1500;3'UTR	NA	NA
cg00386999	0.524688	0.760991	2.49711e-07	2.89906e-05	chr1	237841527	-		OpenSea	ACTCATTAGATCGTTGCCCTTTTCAGAACATACTTGTCTACAAATGTGTATTTTACTGCA[CG]TAAATATTCTGTGGCATGAAAATAACTGCATGAATCATCTTCCCAGCATTCTTGGTCAGA	CGTGCAGTAAAATACACATTTGTAGACAAGTATGTTCTGAAAAGGGCAAC	RYR2	NM_001035	Body				NA				RYR2	ENST00000542288.1	5'UTR	RYR2	ENST00000542288.1	5'UTR	NA	NA
cg00387582	0.374829	0.669125	1.12045e-05	0.000512746	chr7	103087615	+	chr7:103086344-103086840	S_Shore	ATCTTTTTTTTTTTTTTTGCTTTGTGCATTTCTGCGCGTGCACACTGTAGTGACACGTGG[CG]GACTAGCTGTTTGGTCTTAAAGCTGTAAATGCACGCCTGCAGACACCAGAGGCTTCTGCC	TGGTGTCTGCAGGCGTGCATTTACAGCTTTAAGACCAAACAGCTAGTCCG	SLC26A5;SLC26A5;SLC26A5;SLC26A5;SLC26A5;LOC101927870	NM_206883;NM_206885;NM_001167962;NM_206884;NM_198999;NR_110141	TSS1500;TSS1500;TSS1500;TSS1500;TSS1500;Body			RDMR	NA		7:103087037-103088211	Unclassified	SLC26A5;SLC26A5;CTB-107G13.1	ENST00000339444.6;ENST00000306312.3;ENST00000422488.1	TSS1500;TSS1500;5'UTR	SLC26A5;SLC26A5;CTB-107G13.1	ENST00000339444.6;ENST00000306312.3;ENST00000422488.1	TSS1500;TSS1500;5'UTR	NA	NA
cg00388391	0.60783	0.773291	5.311e-06	0.000288603	chr1	18459578	+		OpenSea	TCTCTCCCTCTAGATGCAAAGCACTTTTTTGGAGCAATTAAGGAAAAGCATAAATCAGTC[CG]GTTTTAAAAGCTCAGGCTGACTTTGTGGATTGCTAAAATTAGCGTCTCCATAAAGGAAGA	GAGACGCTAATTTTAGCAATCCACAAAGTCAGCCTGAGCTTTTAAAACCG	IGSF21	NM_032880	Body				TRUE										NA	TRUE
cg00394040	0.406899	0.113654	2.99978e-11	4.21599e-08	chr11	117856785	+	chr11:117856638-117857298	Island	TCCTTAACGCCAAGCCGGCACGCCAGGCAAAAGCGGCTCGGACGCCCTCACCCCACCTTC[CG]CACTCAGGGCCGAGGCTGTGCCTGGCCACCTGCTTCCCAGCACATGCACACACGCGCGCG	CGCACTCAGGGCCGAGGCTGTGCCTGGCCACCTGCTTCCCAGCACATGCA	IL10RA;IL10RA	NR_026691;NM_001558	TSS1500;TSS1500				NA	11:117361864-117362508	11:117856414-117858450	Promoter_Associated	IL10RA;IL10RA;IL10RA;IL10RA	ENST00000227752.3;ENST00000533700.1;ENST00000545409.1;ENST00000536858.1	TSS1500;TSS1500;TSS1500;TSS1500	IL10RA;IL10RA;IL10RA;IL10RA;IL10RA;IL10RA;IL10RA	ENST00000227752.3;ENST00000530761.1;ENST00000533700.1;ENST00000526544.1;ENST00000536858.1;ENST00000531365.1;ENST00000529924.1	TSS1500;TSS1500;TSS1500;TSS1500;TSS1500;TSS1500;TSS1500	NA	TRUE
cg00396966	0.644966	0.761504	1.62608e-08	3.99211e-06	chr1	28701183	+		OpenSea	GTGCTTTTGCTGTTGGTTTACTTCATTTCCAAAACCATCTGTTCATTCAGTCAACAAATA[CG]GAAAGTCTGTTATATTCTAGGCACTGTTGTAGACATTGAGGACAAAACAGTGAAAACAAG	CGGAAAGTCTGTTATATTCTAGGCACTGTTGTAGACATTGAGGACAAAAC	PHACTR4	NM_001048183	5'UTR				NA				PHACTR4;PHACTR4	ENST00000373839.3;ENST00000493669.1	5'UTR;5'UTR	PHACTR4;PHACTR4;PHACTR4	ENST00000373839.3;ENST00000463428.1;ENST00000493669.1	5'UTR;5'UTR;5'UTR	NA	NA
cg00398492	0.623721	0.858514	6.59844e-07	5.95342e-05	chr12	89495415	+		OpenSea	ATCCCCAAGCCTCCACTCAACCTCCAGGAAAATGGTGCATTTTCCGATTGCTTACTCCCA[CG]CTTCATTCTGTGAAGGGGAAATAAAGAGAGGATGACTTGAGAGCAGATGGGGGCAAGGCT	CGCTTCATTCTGTGAAGGGGAAATAAAGAGAGGATGACTTGAGAGCAGAT							NA				RP11-13A1.3	ENST00000549278.1	3'UTR	RP11-13A1.3	ENST00000549278.1	3'UTR	NA	NA
cg00404862	0.353991	0.787435	2.66809e-10	2.1854e-07	chr9	6874022	-		OpenSea	GAGAGAGAGAGGATCAGCTAGCCGACGGAGCAGTCAGAACACACACATTTATTATGTTCA[CG]CTCTTATGTGGGCATGGTTTGTGGTGCCCCCAAACAATAGCAGTGGCAACATCAAAGGTC	ATCAGCTAGCCGACGGAGCAGTCAGAACACACACATTTATTATGTTCACG	KDM4C;KDM4C;KDM4C;KDM4C;KDM4C;KDM4C	NM_001146696;NR_130707;NM_001146695;NM_001304339;NM_015061;NM_001304340	Body;Body;Body;Body;Body;Body				NA				KDM4C	ENST00000489243.1	5'UTR	KDM4C	ENST00000489243.1	5'UTR	NA	NA
cg00411838	0.447019	0.672635	7.82838e-07	6.77386e-05	chr11	107670196	+		OpenSea	CCTGCAACTGCTATATAGAAACACCAGCACCCCTAGTGGTGGCCAGATGAAATGCAGCCA[CG]GCATCACAGAAAAACTTAAGGCTGACATTGTAGTCTATGACAATTTGGCTCTCAGAAAAA	CGGCATCACAGAAAAACTTAAGGCTGACATTGTAGTCTATGACAATTTGG	SLC35F2	NM_017515	Body				NA		11:107669430-107670961	Gene_Associated				SLC35F2;SLC35F2	ENST00000532513.1;ENST00000533664.1	3'UTR;3'UTR	NA	NA
cg00414191	0.089202	0.430365	3.25053e-09	1.31519e-06	chr1	59763019	+	chr1:59762102-59762794	S_Shore	TTCTCTCCTCCCCTTACCCTTGTAGGACATTTTCCTGGCATTTGAGGAGCCTTTAATTCA[CG]TCTGGCTACCGAAGGCATTTTTAGGCTAGTGTTGCTTGTAGATTTAAACGCTTCCAGCAC	CGTCTGGCTACCGAAGGCATTTTTAGGCTAGTGTTGCTTGTAGATTTAAA	FGGY;FGGY;FGGY	NM_018291;NM_001113411;NR_103473	5'UTR;5'UTR;Body				NA		1:59761571-59763109	Promoter_Associated	FGGY;FGGY;FGGY	ENST00000474476.1;ENST00000371218.4;ENST00000303721.7	5'UTR;5'UTR;5'UTR	FGGY;FGGY;FGGY;FGGY;FGGY;FGGY;FGGY	ENST00000413489.1;ENST00000474476.1;ENST00000462744.1;ENST00000371218.4;ENST00000495718.1;ENST00000303721.7;ENST00000430447.1	5'UTR;5'UTR;5'UTR;5'UTR;5'UTR;5'UTR;5'UTR	NA	NA
cg00419757	0.298409	0.566369	4.13686e-08	7.88647e-06	chr5	87695564	+		OpenSea	CAAGAAGGGTTGGGGGGAGAAGGATGTATATTTGGAATGGTGTTTGACAGGGAGAATGAA[CG]CAGACACCAGAACAATTATATTACAATCCCATTGGGAATGCCAGCACCAAATTTAGCCAG	CGCAGACACCAGAACAATTATATTACAATCCCATTGGGAATGCCAGCACC							TRUE				CTC-358I24.1	ENST00000501715.2	5'UTR	CTC-358I24.1;CTC-358I24.1;CTC-358I24.1;CTC-358I24.1;CTC-358I24.1	ENST00000508015.1;ENST00000504922.1;ENST00000501869.2;ENST00000501715.2;ENST00000510087.1	5'UTR;5'UTR;5'UTR;5'UTR;5'UTR	NA	TRUE
cg00420859	0.174978	0.0715209	7.6564e-07	6.66663e-05	chr16	49314826	+	chr16:49314037-49316543	Island	AGCCCGAGCACCCCTGAGGCCAGTAACCCCCCTACGGGGCCAGGGCCCGGCACGAGGCGT[CG]GCTGACCTGTATGGTTTGTCTGTTGTAGACTTTTACCACGTGGAAGTTAAAACTGTAGAT	CGGCTGACCTGTATGGTTTGTCTGTTGTAGACTTTTACCACGTGGAAGTT	CBLN1	NM_004352	Body				NA	16:47870723-47874194			CBLN1	ENST00000219197.5	ExonBnd	CBLN1;CBLN1	ENST00000564786.1;ENST00000219197.5	3'UTR;ExonBnd	NA	TRUE
cg00430080	0.758507	0.563135	5.20276e-06	0.000284067	chr11	134202533	-	chr11:134201784-134202407	S_Shore	TCCGCAGAGGCCGGCGCTTCAGCCTGGCAGGTATGGTCTAGCCAGCTGGCCTGGCAGGGT[CG]TAAGAACAGTGTCCGTGGGCCTCCAAGATCCCGGGCCATGATTTATTTGCACAGTAGGAC	CGACCCTGCCAGGCCAGCTGGCTAGACCATACCTGCCAGGCTGAAGCGCC	GLB1L2	NM_138342	Body				NA		11:134201236-134202836	Unclassified							NA	TRUE
cg00430372	0.597268	0.787498	1.47878e-09	7.3716e-07	chr1	24853821	+		OpenSea	GGGAATACAGGCGTGAGCTACCGCGCATGGCTTTCTGTATTACTTTAATATATGGAAACA[CG]ATAGTAAATAAGAGTAGGATTAATCTTAAAACTGCCCCCTGCTGGAAGCAGCTTGCAGTC	CTTCCAGCAGGGGGCAGTTTTAAGATTAATCCTACTCTTATTTACTATCG	RCAN3;RCAN3;RCAN3;RCAN3;RCAN3;RCAN3;RCAN3;RCAN3;RCAN3;RCAN3	NM_001251984;NM_001251983;NM_013441;NM_001251977;NM_001251981;NM_001251979;NM_001251978;NM_001251985;NM_001251982;NM_001251980	5'UTR;5'UTR;Body;Body;Body;Body;Body;Body;Body;Body				NA		1:24853110-24854040	Unclassified							NA	NA
cg00438026	0.206047	0.428061	1.8284e-05	0.000749432	chr6	31513267	+	chr6:31509668-31509896	S_Shelf	GGGTGGACCTGGGGCCTGACGTCGCAGACCATGCCAAGAAGCTGGGCCAGGACACGCTCT[CG]GTTTCTCTGCTGGGAGCTCTGCATGCCCTGCACCTGGCGCCTTGTAGCCTGCTCCACCTC	CGGTTTCTCTGCTGGGAGCTCTGCATGCCCTGCACCTGGCGCCTTGTAGC	ATP6V1G2;NFKBIL1;NFKBIL1;ATP6V1G2	NM_130463;NM_001144962;NM_001144963;NM_138282	Body;TSS1500;TSS1500;Body				NA				ATP6V1G2;NFKBIL1;NFKBIL1	ENST00000483170.1;ENST00000376146.4;ENST00000542852.1	3'UTR;TSS1500;TSS1500	ATP6V1G2;NFKBIL1;NFKBIL1	ENST00000483170.1;ENST00000376146.4;ENST00000542852.1	3'UTR;TSS1500;TSS1500	NA	TRUE
cg00445682	0.298256	0.707	3.2822e-07	3.5454e-05	chr2	105049869	-		OpenSea	CCATCCTTGGGAATACTTCATAAAACAGAATTACAAGAGTCCATGTTTTTTTCGGAGCAC[CG]TGCAGTGGGAGAGCCTGTCTTGCCTTTTTTTTTTTTTTTTTTTTTTGCTGTCGTTTTATA	CGGTGCTCCGAAAAAAACATGGACTCTTGTAATTCTGTTTTATGAAGTAT	LINC01102	NR_015399	TSS1500				NA				AC013402.2	ENST00000447380.1	TSS1500	AC013402.2;AC013402.2;AC013402.2;AC013402.2;AC013402.2	ENST00000429464.1;ENST00000414442.1;ENST00000447380.1;ENST00000451400.1;ENST00000451400.1	TSS1500;TSS1500;TSS1500;1stExon;5'UTR	NA	NA
cg00446055	0.408203	0.789437	4.0593e-07	4.13558e-05	chr16	69922211	+		OpenSea	GGGTGAGTAGTCTTCTGTCCCATAACAGATCTCTCCTCCTCAAAGACTGAGGCTCCTTTA[CG]GGGGTGGAAACAACGTGGTTATTTATTACCTAGTGGCTAGTAGCCTCTGGGGAGGCTGCT	CGGGGGTGGAAACAACGTGGTTATTTATTACCTAGTGGCTAGTAGCCTCT	WWP2;WWP2;WWP2;WWP2	NM_001270453;NM_001270455;NM_001270454;NM_007014	Body;Body;Body;Body				NA				WWP2;WWP2	ENST00000545099.1;ENST00000544162.1	5'UTR;5'UTR	WWP2;WWP2;WWP2	ENST00000570104.1;ENST00000545099.1;ENST00000544162.1	5'UTR;5'UTR;5'UTR	NA	NA
cg00446965	0.594411	0.443977	4.64179e-06	0.000260835	chr16	49189804	+		OpenSea	CTCTCTCTCTCTCTCTCTCTCTCTCTCTCTCTACATATATATATATATAGCTTAATAGGA[CG]AGCTCCTGGTATTTTTACCAGGCTGCTAAATTCTAGATTACAAGAGTGTGCTTTCATGTC	CGAGCTCCTGGTATTTTTACCAGGCTGCTAAATTCTAGATTACAAGAGTG							NA										NA	NA
cg00447208	0.882037	0.60402	5.13456e-13	2.0605e-09	chr17	76126301	+	chr17:76127521-76128406	N_Shore	CCAATTCCTGAGCACTTACTACCGGCCAGGTGCTAGGCCTGGGTCTTGGCACAACCATAA[CG]CCAATGACAGGGGCTGGAAGTACAGCAGTAACACCAAGAGTATCTGGAAACCCAGCAGCC	CGCCAATGACAGGGGCTGGAAGTACAGCAGTAACACCAAGAGTATCTGGA	TMC8;TMC6;TMC6	NM_152468;NM_007267;NM_001127198	TSS1500;5'UTR;TSS1500				NA				TMC6;TMC6;TMC8	ENST00000322914.2;ENST00000322933.4;ENST00000301627.4	5'UTR;TSS1500;TSS1500	TMC6;TMC6;TMC8	ENST00000322914.2;ENST00000392467.2;ENST00000301627.4	5'UTR;TSS1500;TSS1500	TRUE	TRUE
cg00451467	0.363187	0.616813	1.43925e-07	1.94804e-05	chr1	201038439	-		OpenSea	ATCAGCAGCAGCAGCAGCATAAAGCAGGCAGTCAGAGCCATTCTGTGCCCCAGCCTGTGC[CG]TTCAGAAGGAGTGGAGTGGGCAGTCCTATCCCTGAGGAACTGAACTCTAAGAAACTCTGA	CGGCACAGGCTGGGGCACAGAATGGCTCTGACTGCCTGCTTTATGCTGCT	CACNA1S	NM_000069	Body				NA										NA	NA
cg00452039	0.802529	0.493353	9.52945e-09	2.75133e-06	chr7	151571753	+	chr7:151572761-151575106	N_Shore	GGTGTGATGGCTCACGCCTGTAATCCCAGCACTTTGAGAGGTCAAGGTGGGCGGGTCACT[CG]AGCCCAGCTCATGTGGACCAGCTTTGGGCAACATGGTAAAACCTCATGTCTACAAAAAAA	CGAGCCCAGCTCATGTGGACCAGCTTTGGGCAACATGGTAAAACCTCATG	PRKAG2	NM_016203	Body				NA							PRKAG2;PRKAG2	ENST00000474383.1;ENST00000481434.1	3'UTR;3'UTR	NA	TRUE
cg00455526	0.479407	0.248771	1.47626e-05	0.000635253	chr7	28996196	+	chr7:28995305-28998541	Island	TAGGGACTGTGGAGCCGGGCCCGCGGCGGCAGCGACGGAGGGGCTGGGCTGCTGGAGGCC[CG]GGCCCCGCCGACTCAGCCTTAGGGCGCTGCGGTTGCCTACCAGCTCCCTGGCGGCCCCAT	CGGGCCCCGCCGACTCAGCCTTAGGGCGCTGCGGTTGCCTACCAGCTCCC	TRIL	NM_014817	1stExon			DMR	TRUE	7:28961757-28965052	7:28995441-28997140	Unclassified	TRIL;AC005013.5;AC005013.5	ENST00000322982.3;ENST00000436594.1;ENST00000425873.1	1stExon;TSS1500;5'UTR	TRIL;AC005013.5;AC005013.5	ENST00000322982.3;ENST00000436594.1;ENST00000425873.1	1stExon;TSS1500;5'UTR	NA	TRUE
cg00462168	0.422372	0.0783473	2.0106e-08	4.65494e-06	chr15	79724794	-	chr15:79724099-79725643	Island	GGGCGCGGAATCCGGGCTGCCGGGTGACAGTGACCAGCTGACTCTGGAGCCTACCGGAGG[CG]CGGCATCGGAGGCCGTGCGGACCACTGCCGAACAGCCGCTGGAGACCCGCAGAGAAGGGC	CGGGCTGCCGGGTGACAGTGACCAGCTGACTCTGGAGCCTACCGGAGGCG	KIAA1024	NM_015206	TSS200			DMR	NA	15:77511155-77512666			KIAA1024	ENST00000305428.3	TSS200	KIAA1024	ENST00000305428.3	TSS200	NA	TRUE
cg00463743	0.285711	0.5342	2.90456e-06	0.000181977	chr7	50937377	+		OpenSea	GTTGGGAACAGTTTCCAAGCCATTAAAATGTTATTCTTCCAAATCCTCCTGCATCGGCAA[CG]GGAAAAAAGACAAAATGCAGTGTCATTTGGGCTTTGCCTAAAATGAATTGAATCCTCCTC	CGGGAAAAAAGACAAAATGCAGTGTCATTTGGGCTTTGCCTAAAATGAAT							NA				RP4-724E13.2	ENST00000420449.1	5'UTR	RP4-724E13.2	ENST00000420449.1	5'UTR	NA	NA
cg00463949	0.645382	0.500124	2.35568e-05	0.000912687	chr19	55266230	+		OpenSea	AAAGTCTTTCACGTTAGCACAGATTTTAGGCATCTCGTGTTCAGGAGGTTGGATCTGAGA[CG]TGTTTTGAGTTGGTCATAGTGAAGGACGCTAGGTGTAAATTCTAGTGAGAACAATTTCCA	TCACTAGAATTTACACCTAGCGTCCTTCACTATGACCAACTCAAAACACG	KIR3DP1	NM_001015070	TSS1500				NA										NA	TRUE
cg00463957	0.79147	0.898606	2.50788e-06	0.000162903	chr16	14583487	+		OpenSea	TTCAATGTCTTCGGTCACATGGAAGTGGAGCCCCTGAGTGGGACACATGTGGTGTAAATG[CG]TACTGCAACTCAGATGCCAGACTTCAGCCTTGCTCGGTGGCTAAGGGCATTTTTGCAGTC	GCCCTTAGCCACCGAGCAAGGCTGAAGTCTGGCATCTGAGTTGCAGTACG	PARN;PARN	NM_001134477;NM_002582	Body;Body				TRUE							PARN;PARN	ENST00000564904.1;ENST00000564882.1	3'UTR;3'UTR	NA	TRUE
cg00464519	0.443419	0.217096	1.05269e-05	0.000488572	chr9	37034655	+	chr9:37034135-37038341	Island	GCCCGGGTCTTCCAGCCGCACCTTCTATTAAGACATGCGCTTGGGGGTCGCGGCCCTCTG[CG]CTGTGCGCGGGGCCTGTGACATCTCCATGTGCAAACCCCGCTGCTTAGACGAGCGCAGGC	CGCTGTGCGCGGGGCCTGTGACATCTCCATGTGCAAACCCCGCTGCTTAG	PAX5	NM_016734	TSS200			DMR	NA	9:37024246-37024851	9:37034084-37035335	Unclassified	PAX5;PAX5;PAX5;PAX5	ENST00000377847.2;ENST00000377852.2;ENST00000358127.4;ENST00000377849.3	TSS1500;TSS1500;TSS1500;TSS200	PAX5;PAX5;PAX5;PAX5	ENST00000523145.1;ENST00000377840.2;ENST00000358127.4;ENST00000377849.3	TSS1500;TSS1500;TSS1500;TSS200	NA	TRUE
cg00464647	0.314125	0.553206	1.44587e-06	0.000107553	chr9	37937279	-		OpenSea	TGGTGAAAGCCATGCTGCTGACTTGTCTATAAGCTCCGCCCTGAAAGCCTGTGCTTAAAA[CG]TGGCAGGGTGATCTCCAAGCTGCCTGAGGCCATAAGCAGAGTGTGGATTTTCCAAAAGAA	TGCTGCTGACTTGTCTATAAGCTCCGCCCTGAAAGCCTGTGCTTAAAACG	SHB	NM_003028	Body				NA				U7;RP11-613M10.9	ENST00000515936.1;ENST00000540557.1	TSS1500;3'UTR	U7;RP11-613M10.9	ENST00000515936.1;ENST00000540557.1	TSS1500;3'UTR	NA	NA
cg00465131	0.811392	0.655373	2.16214e-05	0.000854397	chr16	34554306	+		OpenSea	TCAGATGAAGTGATCACAGGGATATAGCCGGACTCTTGGAAATCAGGACTGAAGTGCTGA[CG]GATTAAGGTGCTGTGTTTTCACTGCCTTGACAGGCAGCAAACTGCCTGCCAAACACAGGC	CGGATTAAGGTGCTGTGTTTTCACTGCCTTGACAGGCAGCAAACTGCCTG							NA										NA	NA
cg00467529	0.417434	0.0910564	4.34914e-08	8.17393e-06	chr11	117857293	+	chr11:117856638-117857298	Island	TGGCTCAGACGCTCATGGTAAGGCTCCGGGACGCGGCCCTTCCCTGCCCTGCCCTCTCCG[CG]CCCGCTCCATTAAAGTTCTCCATCCAGTGGAGAGCCCTGGCTGGCTGGCCCTCTGGCAGA	CGCCCGCTCCATTAAAGTTCTCCATCCAGTGGAGAGCCCTGGCTGGCTGG	IL10RA;IL10RA	NR_026691;NM_001558	Body;Body				TRUE	11:117361864-117362508	11:117856414-117858450	Promoter_Associated	IL10RA;IL10RA;IL10RA;IL10RA;IL10RA	ENST00000541785.1;ENST00000545409.1;ENST00000536858.1;ENST00000536858.1;ENST00000533700.1	5'UTR;5'UTR;5'UTR;1stExon;5'UTR	IL10RA;IL10RA;IL10RA;IL10RA;IL10RA;IL10RA;IL10RA;IL10RA;IL10RA	ENST00000530761.1;ENST00000541785.1;ENST00000545409.1;ENST00000536858.1;ENST00000536858.1;ENST00000531365.1;ENST00000529924.1;ENST00000530761.1;ENST00000533700.1	1stExon;5'UTR;5'UTR;5'UTR;1stExon;5'UTR;TSS200;5'UTR;5'UTR	NA	TRUE
cg00467722	0.642649	0.805842	1.08456e-08	2.99998e-06	chr1	60323018	+		OpenSea	TTCACAGCTACAGCAATTGAAAGGCTGCTTGTTTTCAAGGTTACTGCAGAGCTGGGGAGA[CG]GGAATCATAGTTAGAAAAGTTAAAAGAGCAAAAAGCTTACTGTTCTAACCAAGGTTTAGC	CGGGAATCATAGTTAGAAAAGTTAAAAGAGCAAAAAGCTTACTGTTCTAA	HOOK1	NM_015888	Body				NA				HOOK1	ENST00000465876.1	5'UTR	HOOK1	ENST00000465876.1	5'UTR	NA	NA
cg00469856	0.229433	0.105848	1.55007e-06	0.000113449	chr2	71017557	+	chr2:71017028-71017976	Island	GCAGGGAAGGGGGGAACGGACGTCGACCCTAGGGATCCCTCACCCGCTCACGCTCCTTGG[CG]TTGGCCACACGCCGCCGCTCCAGCACCAACTGGAGGTTTTCAGTGGACGAGTAGCCGCCC	GTCCACTGAAAACCTCCAGTTGGTGCTGGAGCGGCGGCGTGTGGCCAACG	FIGLA	NM_001004311	1stExon				TRUE	2:70870337-70871553	2:71016476-71017988	Unclassified	FIGLA	ENST00000332372.6	1stExon	FIGLA	ENST00000332372.6	1stExon	NA	TRUE
cg00478734	0.580709	0.786857	1.76435e-08	4.22747e-06	chr4	123817651	-		OpenSea	AATATAGATTGGGTAAGGCTGCAAAACATAAGCTTAATTAGCTCACATGCTCTGCTCTCA[CG]TGGCACCAGTGGATAGTGTGAGAGAATTAGGCTGTAGAACAAATGGCCTTCTCTTTCAGC	GTAAGGCTGCAAAACATAAGCTTAATTAGCTCACATGCTCTGCTCTCACG	NUDT6;FGF2;NUDT6	NM_198041;NM_002006;NM_007083	Body;3'UTR;Body				TRUE				FGF2	ENST00000264498.3	3'UTR	FGF2;NUDT6;NUDT6;NUDT6	ENST00000264498.3;ENST00000512116.1;ENST00000503370.1;ENST00000510735.1	3'UTR;3'UTR;3'UTR;3'UTR	NA	NA
cg00478851	0.361666	0.156621	1.37967e-06	0.000104094	chr11	7534329	-	chr11:7534554-7535727	N_Shore	TTAACAGCAGCCAGTCCTTGGAGGCCTGGGCAGGGCCACAACATAGCAGTACAACCAAAA[CG]GGTTCAGGCCACACGCTGGAGGTAGGGGCTGGACCAGATCTCCAGCTTCAGTCCTCCCCA	AGTCCTTGGAGGCCTGGGCAGGGCCACAACATAGCAGTACAACCAAAACG	PPFIBP2	NM_003621	TSS1500				NA				PPFIBP2;PPFIBP2;CTD-2516F10.2	ENST00000299492.4;ENST00000537211.1;ENST00000530201.1	TSS1500;TSS1500;TSS1500	PPFIBP2;PPFIBP2;PPFIBP2;CTD-2516F10.2;PPFIBP2	ENST00000528947.1;ENST00000299492.4;ENST00000537211.1;ENST00000530201.1;ENST00000526873.1	TSS1500;TSS1500;TSS1500;TSS1500;TSS200	NA	TRUE
cg00481159	0.646021	0.776844	5.75458e-06	0.000307265	chr12	96353086	+	chr12:96350518-96350721	S_Shelf	CTGGATTCCCATTGGTAAAGCCTGAGCTCAAATAACAGCTAAAGAGCATCTCCTAAGTTA[CG]TGGCCACCATGTGGTAGAGCTCTGTGTCTACCAGACTCTAAAAGCCCAGGCTTTTCTAAC	CGTGGCCACCATGTGGTAGAGCTCTGTGTCTACCAGACTCTAAAAGCCCA	AMDHD1	NM_152435	Body				NA				RP11-410A13.3	ENST00000551323.1	3'UTR	AMDHD1;AMDHD1;RP11-410A13.3	ENST00000549171.1;ENST00000548310.1;ENST00000551323.1	5'UTR;3'UTR;3'UTR	NA	TRUE
cg00488445	0.638636	0.775093	3.08634e-10	2.39511e-07	chr1	74929641	-		OpenSea	TGTTGGCTTTTAAACATGAGGCAGGCCTCAGAATAGGTGGTCTTCAGTAGCACTGGCTCA[CG]TAGGAGGCAGAAGACCTGGGTCCTAATCCCTCTCTAACTTTCTGAGTTGACAGTATTATG	CGTGAGCCAGTGCTACTGAAGACCACCTATTCTGAGGCCTGCCTCATGTT	FPGT-TNNI3K;FPGT-TNNI3K;TNNI3K	NM_001199327;NM_001112808;NM_015978	Body;Body;Body				NA										NA	NA
cg00499343	0.552444	0.696645	2.55744e-05	0.000971729	chr5	31486367	+		OpenSea	CCAAAATCTGTCCCCTACGTAAAAGAAACTAGAAACAGATGTAAAGTTAATATCAGCAGA[CG]TAACACAAGGAGAAAGGGGTATAAAAACAGGTCAACAAGTTGAAAATTGGCCTGAATTTT	AATTTTCAACTTGTTGACCTGTTTTTATACCCCTTTCTCCTTGTGTTACG	DROSHA;DROSHA	NM_001100412;NM_013235	Body;Body				NA							DROSHA;DROSHA;DROSHA	ENST00000512124.2;ENST00000510375.1;ENST00000512885.1	TSS1500;3'UTR;3'UTR	NA	NA
cg00500551	0.488561	0.693218	8.62964e-08	1.33843e-05	chrX	81903666	-		OpenSea	GGGATCCTTAAGGTGAATTCAGACTGGCCTAGTAGCTATAGCTCAACCTATTCTTCCTTG[CG]TTGTCCACACTTCTGGATTAATATTAATTTCCACCAGGTGGAGACAGAGTTTGTCCTGGG	CGCAAGGAAGAATAGGTTGAGCTATAGCTACTAGGCCAGTCTGAATTCAC							NA										NA	NA
cg00501876	0.521297	0.302679	2.58634e-06	0.000166558	chr3	39193251	-	chr3:39194241-39195359	N_Shore	CCTCCCAGCACCTCTAGCCCCCACTGAAAAACCAGCCTGGGTGGCCCTGAGAGGGCAGAC[CG]AAAGCCTTGGCACCTCCTCCCCAACCATCCCTCTGAAGGAGAGCTGGGGGAGGGGACGGC	CGGTCTGCCCTCTCAGGGCCACCCAGGCTGGTTTTTCAGTGGGGGCTAGA	CSRNP1	NM_033027	5'UTR				NA				CSRNP1;CSRNP1	ENST00000273153.5;ENST00000514182.1	5'UTR;5'UTR	CSRNP1;CSRNP1	ENST00000273153.5;ENST00000514182.1	5'UTR;5'UTR	NA	TRUE
cg00505979	0.343563	0.0999087	4.36459e-09	1.62385e-06	chr1	212873626	-	chr1:212872460-212874048	Island	GGAACTCAGGTTGAGAAACACAGTGGGTGTTTTGGGGTCGGTGTTTTTTCCCGGTCCCAT[CG]CGGCATCTTCCTGCGCCTCAGCCACGCCCTGCGTCCGCCCCCCGGCGCGGGGGTCACAGT	GAGAAACACAGTGGGTGTTTTGGGGTCGGTGTTTTTTCCCGGTCCCATCG	BATF3	NM_018664	TSS1500				NA	1:210939045-210941223			BATF3	ENST00000243440.1	TSS1500	BATF3	ENST00000243440.1	TSS1500	NA	TRUE
cg00508283	0.21252	0.474722	5.28019e-07	5.02779e-05	chr1	184580432	+		OpenSea	TTTCTTCAGTATGTCTTTGGCATTTAAAACTGTTCTTATGACTTGTTGTTTGACTATAAA[CG]AAAATGCTGCTGAAAAGTGCTCTGTGATTAAAGAGGCTCTGACACATCCAGCCCTGAGAA	CGAAAATGCTGCTGAAAAGTGCTCTGTGATTAAAGAGGCTCTGACACATC	C1orf21	NM_030806	Body				NA										NA	NA
cg00511674	0.573299	0.26366	1.25146e-06	9.67428e-05	chr16	78080068	-	chr16:78079752-78080166	Island	CCTCCAGGCCTGCAGCCACGCTTGGCGCTGTCCGCTAGGGCCAGGTGCTGAAGTGTTGGC[CG]CGAGCGGAGCTGCTGCAGCGCTGGCTTCCCCGGGCCGCTGCGGGTGGACTTGGACAACAT	CGGCCAACACTTCAGCACCTGGCCCTAGCGGACAGCGCCAAGCGTGGCTG						DMR	NA	16:76637266-76637695	16:78080042-78080072	Unclassified_Cell_type_specific	RP11-281J9.2	ENST00000563114.1	3'UTR	RP11-281J9.2	ENST00000563114.1	3'UTR	NA	TRUE
cg00512459	0.203826	0.399559	2.61432e-05	0.000988454	chr15	88266173	-		OpenSea	TTCTACAGCCTGAAAGAAGCCCAGGGAGCCAGCATGCTTGTGCCTTTTTCCTGAGGAGTA[CG]AACCAGTGCAGTGGCCATGGTGGCTCTGTGCAGGAAAGTGGGGGGATGGTGTTTCTTCTG	AAAGAAGCCCAGGGAGCCAGCATGCTTGTGCCTTTTTCCTGAGGAGTACG							TRUE										NA	TRUE
cg00513676	0.197656	0.660834	1.03512e-10	1.09351e-07	chr12	14772144	+		OpenSea	AGTTGCCCTCTGCTGGAAAACAGCATCTTTGTCCTCTGAGAAAAACAGTCTCCCTTCTTA[CG]GAGGCCAGTGGATTCCATCCTAGAGGCTGTGTTGACCGTATCTCCAAATAGACAATAACG	CGGAGGCCAGTGGATTCCATCCTAGAGGCTGTGTTGACCGTATCTCCAAA	GUCY2C;PLBD1-AS1;GUCY2C	NM_004963;NR_120465;NM_004963	ExonBnd;Body;Body				NA		12:14771968-14772212	Unclassified_Cell_type_specific	GUCY2C;RP11-695J4.2;RP11-695J4.2	ENST00000261170.3;ENST00000545424.1;ENST00000542401.1	ExonBnd;5'UTR;5'UTR	GUCY2C;RP11-695J4.2;RP11-695J4.2	ENST00000261170.3;ENST00000545424.1;ENST00000542401.1	ExonBnd;5'UTR;5'UTR	NA	NA
cg00514596	0.645463	0.379224	2.86615e-06	0.000180198	chr9	130534101	+	chr9:130533453-130533882	S_Shore	AATCCTTGGTCCTTTACTCCCGAATGAGGACGAATGTAGGAGGGGATGACAGAAGGCAGC[CG]GGGATGGTGGAAAAACATGAGTTCTACTAATCGTAAATACAGCATTCCCATTTACTGAGT	CGGGGATGGTGGAAAAACATGAGTTCTACTAATCGTAAATACAGCATTCC	SH2D3C;SH2D3C;SH2D3C	NM_001252334;NM_005489;NM_170600	TSS1500;TSS1500;Body				NA		9:130533074-130534333	Promoter_Associated	SH2D3C;SH2D3C	ENST00000373277.4;ENST00000473535.1	TSS1500;3'UTR	SH2D3C;SH2D3C;SH2D3C;SH2D3C	ENST00000373277.4;ENST00000473535.1;ENST00000468969.1;ENST00000471939.1	TSS1500;3'UTR;3'UTR;3'UTR	NA	NA
cg00515437	0.5871	0.725491	6.04815e-06	0.000319042	chr15	83422206	+	chr15:83419022-83419592	S_Shelf	GTATTTCTTTTGCGTGTGCCTGTGTGTGTCAAAATTTTATATGTTCATCAGTGCTCTACA[CG]TTCAGAGAAACGTTTCCAATAACGAACCATAGAATGATCCCTGGAGCATAGGATCCCACT	TGCTCCAGGGATCATTCTATGGTTCGTTATTGGAAACGTTTCTCTGAACG							NA				RP11-752G15.6;RP11-752G15.6;RP11-752G15.6;RP11-752G15.6;RP11-752G15.6	ENST00000544685.2;ENST00000558687.1;ENST00000561107.1;ENST00000558174.1;ENST00000559366.1	5'UTR;5'UTR;5'UTR;5'UTR;5'UTR	RP11-752G15.6;RP11-752G15.6;RP11-752G15.6;RP11-752G15.6;RP11-752G15.6	ENST00000544685.2;ENST00000558687.1;ENST00000561107.1;ENST00000558174.1;ENST00000559366.1	5'UTR;5'UTR;5'UTR;5'UTR;5'UTR	NA	TRUE
cg00519399	0.359958	0.633568	5.32735e-08	9.45013e-06	chrX	133557876	-		OpenSea	CATCTATTGCTGACCACAAGAGGGCATCCAGTGAACATGTTCTAAGCATTCTTCCATTGT[CG]TCTTATGTATAATAGACATAAAACTGAGGAATCGCCTTACACTCATAGGTGGGAATTGAA	CGACAATGGAAGAATGCTTAGAACATGTTCACTGGATGCCCTCTTGTGGT	PHF6;PHF6	NM_032458;NM_001015877	Body;Body				NA		X:133557059-133557882	Unclassified_Cell_type_specific							NA	NA
cg00521492	0.626661	0.74435	3.43223e-06	0.000206604	chr10	46962439	+		OpenSea	TTAAGTCTACCTTATGCCAAAGAGCTGAGGGAGGAAAGGGCCCCTCTAGAAAGAAGGCCT[CG]GCCATCCGAGAGTACATTCAGCAGTAACATTCACTGGCCACCGTGGAGAAGGGTCTTAAG	CGGCCATCCGAGAGTACATTCAGCAGTAACATTCACTGGCCACCGTGGAG	SYT15;SYT15	NM_181519;NM_031912	Body;Body				NA		10:46962035-46962855	Unclassified	SYT15;RP11-38L15.3	ENST00000449358.2;ENST00000506914.1	TSS1500;5'UTR	SYT15;RP11-38L15.3	ENST00000449358.2;ENST00000506914.1	TSS1500;5'UTR	NA	NA
cg00523547	0.360648	0.729647	5.90571e-10	3.76825e-07	chr13	33766229	-		OpenSea	GGTTACAGGAGTCTGTGAGCTGGAGTCTCTGTTTTTTGGCAGTTCCCACAGCAATTAACC[CG]GTGTTAGGCACACAGTGGCATGGTAAAACTTGTTGGCAATTCATGAAATAGTTACTATTG	CGGGTTAATTGCTGTGGGAACTGCCAAAAAACAGAGACTCCAGCTCACAG	STARD13;STARD13;STARD13;STARD13	NM_052851;NM_001243474;NM_178006;NM_001243476	5'UTR;5'UTR;Body;Body				NA				STARD13;STARD13;RP11-81F11.3	ENST00000399365.3;ENST00000487412.1;ENST00000344312.4	5'UTR;3'UTR;3'UTR	STARD13;STARD13;STARD13;RP11-81F11.3	ENST00000399365.3;ENST00000487412.1;ENST00000498019.1;ENST00000344312.4	5'UTR;3'UTR;3'UTR;3'UTR	NA	NA
cg00524662	0.370065	0.876119	6.19867e-15	5.90324e-11	chr2	102798966	-		OpenSea	CTTTCAAGGCTGTAGACAGCAGCCATCTGTTTCAACAGTTTTTGTCGTCAGATGCTATTC[CG]TAGTCCTGCCTTCCACACTGTACTTGATTGCTTCTGAATTCTTGTCTTTCCTAAAACTGG	CGGAATAGCATCTGACGACAAAAACTGTTGAAACAGATGGCTGCTGTCTA							NA				AC007271.3	ENST00000428188.1	TSS1500	AC007271.3	ENST00000428188.1	TSS1500	NA	NA
cg00525876	0.683124	0.802372	1.53473e-05	0.000654489	chr12	131486842	+	chr12:131488696-131488975	N_Shore	AACCAGGAAACTGTCCAGACTCAGGCAGGGTCCAATATGCATTAAAGAGAATGCATGAAT[CG]GTCTCTACCCCACAGAACTGCATGCCAGAAACACAGACTTCCATGTGCTTAACTGGGCCT	CGGTCTCTACCCCACAGAACTGCATGCCAGAAACACAGACTTCCATGTGC	ADGRD1	NM_198827	Body				NA				GPR133	ENST00000376682.4	TSS1500	GPR133	ENST00000376682.4	TSS1500	NA	NA
cg00532667	0.483296	0.379411	3.0409e-06	0.000187996	chr4	9692836	+	chr4:9692917-9693603	N_Shore	GGTCTGGACCACACCTAGTTTTTCTCACTGTTACATCTGCCTTGCCAGGCGCATGGTAGG[CG]CTTAGTAAGTATTTGGTGAACGAATGGCTTGTTTGGTGACAGTCCAAAGGCTGGAGGACA	TTTGGACTGTCACCAAACAAGCCATTCGTTCACCAAATACTTACTAAGCG							NA		4:9692823-9693797	Promoter_Associated							NA	TRUE
cg00533132	0.743979	0.387487	1.09224e-07	1.59991e-05	chr6	80853181	+		OpenSea	AGTTCACTAGGAAAAGTTATTTTCCAGTCAGACTAGGAGGAGCCAATAAAAACAGCTCTA[CG]TGGAGGACAGTATTAATGTCATTTGCCAGATATTTGTTGAGTGAGACTGCCTATGCAAAA	CGTGGAGGACAGTATTAATGTCATTTGCCAGATATTTGTTGAGTGAGACT	BCKDHB;BCKDHB	NM_000056;NM_183050	Body;Body				NA										NA	NA
cg00533891	0.599433	0.839166	1.93861e-05	0.000784526	chr10	80919242	-		OpenSea	GAGCAGGGCTGCTGAGCAGCTCCCAGGGCTGGGCAGGGTTCAGGCTCTCCGGCTGGTTGC[CG]CATAGCGGGCAGACTGTGAGTGGGGATGGGCTGCTTACTCACATCCCGGCTGTGTTCCTG	CGGCAACCAGCCGGAGAGCCTGAACCCTGCCCAGCCCTGGGAGCTGCTCA	ZMIZ1	NM_020338	5'UTR				TRUE				ZMIZ1	ENST00000334512.5	5'UTR	ZMIZ1	ENST00000334512.5	5'UTR	NA	TRUE
cg00537210	0.67768	0.844102	1.84886e-05	0.000756363	chr2	23786588	-	chr2:23785049-23785339	S_Shore	TCTCCTGGTTTTCAAAACTCCCTTTCAGCCCTGCTTCCCATTAATAACTGTGAGTGTTGC[CG]GCCACAGAGCCTGGCAGAGGCTGAGACAATGGAGCTATTGGAGGCTGGCTCGGAGCGCAC	CAAAACTCCCTTTCAGCCCTGCTTCCCATTAATAACTGTGAGTGTTGCCG	KLHL29	NM_052920	Body				TRUE							KLHL29	ENST00000489446.1	5'UTR	NA	TRUE
cg00542846	0.185345	0.41754	1.18411e-05	0.000535581	chr21	27543545	+	chr21:27541893-27543524	S_Shore	GCTAGGGTGCGTTTTTATCCGCATTTCGTTTTTTCTCTCGGTTTGGAGAGGTGGGGCAGG[CG]TTTCTGGAAGAGAATGAGAACGAGTGAAGCTTAAAGGAAATAGGATTTTCTTTGCTTGTT	AAATCCTATTTCCTTTAAGCTTCACTCGTTCTCATTCTCTTCCAGAAACG	APP;APP;APP;APP;APP;APP;APP;APP;APP	NM_001204302;NM_001136129;NM_001136130;NM_000484;NM_001204303;NM_001204301;NM_201414;NM_201413;NM_001136131	TSS1500;TSS1500;TSS1500;TSS1500;TSS1500;TSS1500;TSS1500;TSS1500;TSS200				NA		21:27542999-27544166	Promoter_Associated	APP;APP;APP;APP;APP;APP;APP;AP001439.2	ENST00000346798.3;ENST00000474136.1;ENST00000354192.3;ENST00000348990.5;ENST00000357903.3;ENST00000358918.3;ENST00000448388.2;ENST00000455275.1	TSS1500;TSS1500;TSS1500;TSS1500;TSS1500;TSS1500;TSS200;5'UTR	APP;APP;APP;APP;APP;APP;APP;AP001439.2	ENST00000346798.3;ENST00000474136.1;ENST00000354192.3;ENST00000348990.5;ENST00000357903.3;ENST00000358918.3;ENST00000448388.2;ENST00000455275.1	TSS1500;TSS1500;TSS1500;TSS1500;TSS1500;TSS1500;TSS200;5'UTR	TRUE	NA
cg00544449	0.655243	0.268188	1.75735e-08	4.21546e-06	chr15	79724802	-	chr15:79724099-79725643	Island	AATCCGGGCTGCCGGGTGACAGTGACCAGCTGACTCTGGAGCCTACCGGAGGCGCGGCAT[CG]GAGGCCGTGCGGACCACTGCCGAACAGCCGCTGGAGACCCGCAGAGAAGGGCGGGCCCTG	CGGGTGACAGTGACCAGCTGACTCTGGAGCCTACCGGAGGCGCGGCATCG	KIAA1024	NM_015206	TSS200			DMR	NA	15:77511155-77512666			KIAA1024	ENST00000305428.3	TSS200	KIAA1024	ENST00000305428.3	TSS200	NA	TRUE
cg00547090	0.807138	0.471079	5.5152e-12	1.16526e-08	chr11	27492738	+	chr11:27493640-27494357	N_Shore	CGTGGCCTTTGCCACCACCTCCACAACCTAGTTCAGATTCCTCTTCTTTTCTCAAGGGAA[CG]TCTAAAGCTCTCAAGTCCGTTTTGGCAGGGCGATTTTGTAAGTCTGAAACATTTCAGTGT	CGTCTAAAGCTCTCAAGTCCGTTTTGGCAGGGCGATTTTGTAAGTCTGAA	LOC105376671;LOC105376671;LGR4	NR_131169;NR_131170;NM_018490	TSS1500;TSS1500;Body			RDMR	NA				RP11-159H22.2;RP11-159H22.2	ENST00000525833.1;ENST00000529258.1	TSS1500;TSS1500	RP11-159H22.2;RP11-159H22.2	ENST00000525833.1;ENST00000529258.1	TSS1500;TSS1500	NA	NA
cg00551609	0.722582	0.294816	5.52676e-09	1.89594e-06	chr2	74214662	-	chr2:74211214-74212314	S_Shelf	CATTGGCCGTCTTTCCCTCCCATTATAGTGGCGGACTGCCGGCTTGAGGTTGGTGACAGC[CG]CGACAGCAGAGAGTTGGCAGAAGTAGGGCTGAGCGAAGTTGAGCAGCTTAGGAGGAGCGG	TTCCCTCCCATTATAGTGGCGGACTGCCGGCTTGAGGTTGGTGACAGCCG						CDMR	TRUE		2:74214468-74215207	Promoter_Associated	RP11-711M9.1	ENST00000496886.1	5'UTR	RP11-711M9.1	ENST00000496886.1	5'UTR	NA	TRUE
cg00552478	0.138402	0.376414	6.36506e-08	1.07193e-05	chr2	113258853	-		OpenSea	TCTCATCTCCTCAGAGGCTTCAGAGCTTCTCGATTTCATAGACAACCAGGGCCAAGTGCA[CG]TGATCCAGAAATATCTTGAGCACCCTCTGCTGCTTGAGCCAGGTCATCGCAAGTTTGACA	CGTGCACTTGGCCCTGGTTGTCTATGAAATCGAGAAGCTCTGAAGCCTCT	TTL	NM_153712	Body				NA		2:113258669-113258993	Unclassified_Cell_type_specific				TTL	ENST00000476615.1	TSS200	NA	NA
cg00553605	0.305984	0.572959	9.41517e-06	0.000448155	chr7	73149190	-	chr7:73152564-73153716	N_Shelf	CGAGTGCTGGGATGACAGGCATGAGCCACTGTGCCCAGCTCCGCCCTTTCTTTCACAAGA[CG]TGGGTAGAGCACCCTCTTGTGGTGAAGGGAGGAAGGGGGCTGAGTGTGCTCTGGGCCTGG	TGACAGGCATGAGCCACTGTGCCCAGCTCCGCCCTTTCTTTCACAAGACG	ABHD11-AS1	NR_026690	TSS1500				NA		7:73148918-73149822	Promoter_Associated	ABHD11-AS1	ENST00000427153.1	TSS200	ABHD11-AS1	ENST00000427153.1	TSS200	NA	NA
cg00554250	0.70444	0.812776	3.49135e-06	0.000209431	chr11	47281370	-		OpenSea	AGACCCCCTTGTGCCTCTCTTTTGGAGCTCAGACTCTGCGGTGGAGCTGTGGAAGCCAGG[CG]CACAGGATGCAAGCAGCCAGGCCCAGGGAGGCAGCAGCTGCATCCTCAGAGAGGAAGCCA	CGCCTGGCTTCCACAGCTCCACCGCAGAGTCTGAGCTCCAAAAGAGAGGC	NR1H3;NR1H3;NR1H3	NM_001130102;NM_005693;NM_001130101	5'UTR;Body;Body				NA		11:47280884-47281525	Unclassified	NR1H3;NR1H3;NR1H3;NR1H3	ENST00000395397.3;ENST00000481889.2;ENST00000527949.1;ENST00000529540.1	5'UTR;5'UTR;TSS1500;5'UTR	NR1H3;NR1H3;NR1H3;NR1H3;NR1H3;NR1H3;NR1H3;NR1H3;NR1H3;NR1H3;NR1H3;NR1H3;NR1H3;NR1H3;NR1H3;NR1H3;NR1H3;NR1H3;NR1H3;NR1H3	ENST00000495866.1;ENST00000527464.1;ENST00000395397.3;ENST00000481889.2;ENST00000531660.1;ENST00000487913.1;ENST00000412937.1;ENST00000461778.1;ENST00000525441.1;ENST00000476086.2;ENST00000530310.1;ENST00000498548.1;ENST00000527949.1;ENST00000473222.1;ENST00000419652.1;ENST00000483882.1;ENST00000483882.1;ENST00000529540.1;ENST00000481020.1;ENST00000532630.1	5'UTR;5'UTR;5'UTR;5'UTR;5'UTR;5'UTR;5'UTR;5'UTR;5'UTR;5'UTR;5'UTR;5'UTR;TSS1500;5'UTR;3'UTR;1stExon;5'UTR;5'UTR;5'UTR;5'UTR	TRUE	TRUE
cg00556407	0.465073	0.667004	1.57256e-05	0.00066689	chr8	95369439	-		OpenSea	AAGCCTCCAGTACTAAGCTACCCAGACAGAAAGCAACATCCAGGTCAAAGCATCACTGTC[CG]ACCACATGACCCTTCTACACCTGGGCCCCGAAGGCACTGCTAGGAGTCAACAGCTCCACC	CGGACAGTGATGCTTTGACCTGGATGTTGCTTTCTGTCTGGGTAGCTTAG							TRUE		8:95368879-95370234	Unclassified							NA	TRUE
cg00557175	0.0945788	0.347355	4.21821e-07	4.25602e-05	chr18	44626898	-		OpenSea	GTTTTTTGGTCAAATCATCCCTCACTCAACTCATTCCTCCGTGGGTGTTCTGATTTGGAT[CG]ACTTTGCTTGCAGATGATAAACTCCTTAGGGCTCAGGCTTTTATTTCTCTGGCACACTCT	AATCATCCCTCACTCAACTCATTCCTCCGTGGGTGTTCTGATTTGGATCG	KATNAL2	NM_031303	Body				TRUE		18:44626564-44627086	Unclassified_Cell_type_specific							NA	TRUE
cg00557630	0.254822	0.582972	1.85845e-07	2.35001e-05	chr19	51017123	-	chr19:51020296-51022796	N_Shelf	CGGGCCCCTGTCGGCCATGGCCCTGAGTGCGGTGTCTGGGGCCTGGCTCCCTGGGCTGCT[CG]CTGCCCGCTGCACAAGGCCTGGGCAGCCGCTGCTCTTTGGACATCTGACCCTTGAGCCTC	GGCCATGGCCCTGAGTGCGGTGTCTGGGGCCTGGCTCCCTGGGCTGCTCG	ASPDH;ASPDH;ASPDH	NM_001114598;NM_001114598;NM_001024656	5'UTR;1stExon;Body				NA				ASPDH;ASPDH	ENST00000389208.3;ENST00000389208.3	1stExon;5'UTR	ASPDH;ASPDH	ENST00000389208.3;ENST00000389208.3	1stExon;5'UTR	NA	TRUE
cg00558156	0.261029	0.0773745	9.9182e-06	0.000466256	chr8	23261618	-	chr8:23260442-23261867	Island	GCAGAGGGGGCGGCTCTGGTCTCCGATGGCTGGAGAAAGCAAGCACCAAGCGTAGGTAGC[CG]CGCGCTGGAGTCGCGCGTTTACTCTTTTCCCCCTTACTTTTAACTAGAGGAGGATGGCAA	GCTCTGGTCTCCGATGGCTGGAGAAAGCAAGCACCAAGCGTAGGTAGCCG	LOXL2;LOXL2	NM_002318;NM_002318	5'UTR;1stExon	high-CpG:23317554-23317666		DMR	NA	8:23316388-23317986			LOXL2;LOXL2;ENTPD4	ENST00000389131.3;ENST00000389131.3;ENST00000521321.1	1stExon;5'UTR;3'UTR	LOXL2;LOXL2;LOXL2;LOXL2;LOXL2;LOXL2;ENTPD4;LOXL2;LOXL2	ENST00000523833.1;ENST00000519243.1;ENST00000389131.3;ENST00000524168.1;ENST00000519243.1;ENST00000389131.3;ENST00000521321.1;ENST00000524075.1;ENST00000523833.1	1stExon;1stExon;1stExon;TSS200;5'UTR;5'UTR;3'UTR;3'UTR;3'UTR	NA	TRUE
cg00560724	0.352234	0.594432	5.35281e-06	0.000290381	chr6	10626970	-		OpenSea	CTTTTGCCTTCGTAATGTTAACCGTTTCAGGACCACGTTTATAGCTTCAGGACCTGGCTA[CG]TAATTATACTTAAAATATCCACTGGACACTGTGAAATACACTAACAGGATGGCTGGGTAG	CGTAGCCAGGTCCTGAAGCTATAAACGTGGTCCTGAAACGGTTAACATTA	GCNT2;GCNT2;GCNT2	NM_001491;NM_145655;NM_145649	3'UTR;3'UTR;3'UTR				NA		6:10626935-10627134	Unclassified_Cell_type_specific	GCNT2;GCNT2;GCNT2;GCNT2;GCNT2	ENST00000495262.1;ENST00000410107.1;ENST00000379597.3;ENST00000316170.3;ENST00000397423.2	3'UTR;3'UTR;3'UTR;3'UTR;5'UTR	GCNT2;GCNT2;GCNT2;GCNT2;GCNT2;GCNT2	ENST00000495262.1;ENST00000410107.1;ENST00000379597.3;ENST00000316170.3;ENST00000489225.1;ENST00000397423.2	3'UTR;3'UTR;3'UTR;3'UTR;5'UTR;5'UTR	NA	TRUE
cg00561025	0.835373	0.68109	3.50488e-06	0.000209947	chr22	39184272	+		OpenSea	AGTAAGGTCAGGAAATGATGCAGAAGCCAGGCTCCCAGACCAGTTTAAAGTGTGGGCAGA[CG]CAGGGCTGCCATTTTAAAATTCTGCTGCAAAAGGGCCTTAGAAGATACATCATCTACTAC	CGCAGGGCTGCCATTTTAAAATTCTGCTGCAAAAGGGCCTTAGAAGATAC	DNAL4	NM_005740	5'UTR				TRUE				DNAL4;DNAL4;DNAL4;SUN2	ENST00000486019.1;ENST00000216068.4;ENST00000406199.3;ENST00000406622.1	3'UTR;5'UTR;5'UTR;5'UTR	DNAL4;DNAL4;DNAL4;DNAL4;SUN2	ENST00000486019.1;ENST00000216068.4;ENST00000406199.3;ENST00000475512.1;ENST00000406622.1	3'UTR;5'UTR;5'UTR;3'UTR;5'UTR	NA	NA
cg00564657	0.854376	0.744078	9.34615e-06	0.000445868	chr16	85380957	-		OpenSea	AGCCCCTAGGAGGAGGTTCTTGGGCTGATGCCAAGGTCTCAGGGCCTCCACATCTTGGGG[CG]CTGGCCTCTCACCCTGGCCCGGCTGGATTCCCCAGCAGCACCCAAGCGCCCTGTTGCCTG	CGCCCCAAGATGTGGAGGCCCTGAGACCTTGGCATCAGCCCAAGAACCTC							NA		16:85380565-85381723	Unclassified_Cell_type_specific							NA	NA
cg00570881	0.686628	0.796993	7.62323e-06	0.000381799	chr3	114476161	-		OpenSea	TATGCTTAACTTTCTATAGGTTCATGTCACTCAACTATACTTTGCCATTCACTTACCATA[CG]TCAAAAAGGTGGAATAATACTATTCTTACATAGAGGACTAATAAGATATACTTAGCAAAA	TCTATAGGTTCATGTCACTCAACTATACTTTGCCATTCACTTACCATACG	ZBTB20;ZBTB20;ZBTB20;ZBTB20;ZBTB20	NR_121662;NM_001164345;NM_001164344;NM_001164343;NM_015642	Body;5'UTR;5'UTR;5'UTR;5'UTR				NA				ZBTB20;ZBTB20;ZBTB20;ZBTB20;ZBTB20	ENST00000488663.1;ENST00000464560.1;ENST00000471418.1;ENST00000462705.1;ENST00000357258.3	3'UTR;5'UTR;5'UTR;5'UTR;5'UTR	ZBTB20;ZBTB20;ZBTB20;ZBTB20;ZBTB20;ZBTB20;ZBTB20;ZBTB20;ZBTB20;ZBTB20	ENST00000488663.1;ENST00000479879.1;ENST00000464560.1;ENST00000471418.1;ENST00000462705.1;ENST00000357258.3;ENST00000463890.1;ENST00000480832.1;ENST00000491500.1;ENST00000492665.1	3'UTR;3'UTR;5'UTR;5'UTR;5'UTR;5'UTR;3'UTR;3'UTR;3'UTR;3'UTR	NA	NA
cg00571819	0.181762	0.362846	1.41098e-06	0.000105819	chr9	133455886	-	chr9:133454629-133455496	S_Shore	AGTGAATATGGGACCTGCCAAAAATACTTACTGGCTTCTGGCATGGTACTTAGAACAGAA[CG]TGTTCTTCATTTGTATCTAAAACTTACTTACAAGTCAGCCCTAACACTTCAGCTTCCTCG	ACCTGCCAAAAATACTTACTGGCTTCTGGCATGGTACTTAGAACAGAACG	LOC100272217;FUBP3	NR_027440;NM_003934	TSS1500;Body				NA				FUBP3;FUBP3	ENST00000467100.1;ENST00000372376.1	5'UTR;5'UTR	FUBP3;FUBP3;FUBP3	ENST00000467100.1;ENST00000465949.1;ENST00000372376.1	5'UTR;TSS1500;5'UTR	NA	TRUE
cg00572560	0.750032	0.604397	1.82331e-07	2.3166e-05	chr10	30093517	+		OpenSea	AGGAGGGCTGCTGCCAGGACTGTGAGAGTTTGTACAGTATTGTGGTGCAATTGCAAAAGG[CG]TGCTTTCTCCTGGCAGGTGCAGCCCCCACACAGGGCTCAGCATGTGGTTAGTGGAGAACA	ACCACATGCTGAGCCCTGTGTGGGGGCTGCACCTGCCAGGAGAAAGCACG							TRUE										NA	TRUE
cg00575674	0.424639	0.60317	3.0601e-07	3.3688e-05	chr1	61314297	-		OpenSea	AAAACAGGAGGGTGGTATGTGTGTCTAGCATTCTGCCTTTTCAGGGGGCTTCCTGAGGGA[CG]AGTTTTTGCCTCATCTGATTCAGAGTCCTAATGGGAAACCAACATACCTTGTTTGCTTAG	CGTCCCTCAGGAAGCCCCCTGAAAAGGCAGAATGCTAGACACACATACCA							TRUE										NA	TRUE
cg00577417	0.415844	0.73429	1.12234e-09	6.00778e-07	chr14	21560483	+	chr14:21558547-21561443	Island	GGGGGGCGCGGGCAGGCCCGGAGGCAGGCCCCGGGGCACGCAGTGGGCCCAGCTTGCTGG[CG]TGCACCTTCATGTGGTTCTTAAGGAACCAGGGCTCCTTGAAGCAGCGGCCGCACACCGGA	CCGCTGCTTCAAGGAGCCCTGGTTCCTTAAGAACCACATGAAGGTGCACG	ZNF219;ZNF219;ZNF219	NM_001101672;NM_016423;NM_001102454	Body;Body;Body				NA	14:20629806-20631283	14:21559917-21561257	Unclassified	RP11-998D10.7	ENST00000554733.1	5'UTR	RP11-998D10.7	ENST00000554733.1	5'UTR	NA	TRUE
cg00578917	0.521714	0.241632	1.18421e-06	9.27956e-05	chr21	27945542	+	chr21:27945010-27945646	Island	GGCTGCGCTGGGGGCCCAGGTCTCTTTGTCTCGCCCCACTGCGCTCAGGCGCGGGGAAGG[CG]GCCACTCCGGCGTCCTTGGCCACCCAGGCTCACATTTCATCTCCGCGGGTGGCAACGACT	CGGCCACTCCGGCGTCCTTGGCCACCCAGGCTCACATTTCATCTCCGCGG	CYYR1;CYYR1	NM_052954;NM_052954	1stExon;5'UTR				NA	21:26866900-26867488			CYYR1;CYYR1;CYYR1	ENST00000299340.4;ENST00000299340.4;ENST00000400043.3	1stExon;5'UTR;TSS200	CYYR1;CYYR1;CYYR1	ENST00000299340.4;ENST00000299340.4;ENST00000400043.3	1stExon;5'UTR;TSS200	NA	NA
cg00580047	0.513939	0.175838	7.22585e-06	0.000366298	chr11	20385630	+	chr11:20385161-20385673	Island	CAGCTCGGGCCCCTTCCGATGGGTCTGCTGGCTCAGGTGCGGGCGATGGCCGGGGAGCCG[CG]CCCCGCACGTGACTCAGCACTTTCCCCAGAGCCCGGACTGCGGAGAACAATATCCTCCTC	CGCCCCGCACGTGACTCAGCACTTTCCCCAGAGCCCGGACTGCGGAGAAC	HTATIP2;HTATIP2;HTATIP2;HTATIP2;HTATIP2;HTATIP2	NM_001098520;NM_001098522;NM_001098522;NM_006410;NM_001098521;NM_001098523	Body;5'UTR;1stExon;5'UTR;5'UTR;TSS200				TRUE	11:20341738-20342450	11:20384340-20386184	Promoter_Associated	HTATIP2;HTATIP2;HTATIP2;HTATIP2;HTATIP2;HTATIP2;HTATIP2;HTATIP2	ENST00000530266.1;ENST00000421577.2;ENST00000443524.2;ENST00000451739.2;ENST00000451739.2;ENST00000532505.1;ENST00000532081.1;ENST00000531058.1	5'UTR;5'UTR;5'UTR;5'UTR;1stExon;5'UTR;TSS200;TSS200	HTATIP2;HTATIP2;HTATIP2;HTATIP2;HTATIP2;HTATIP2;HTATIP2;HTATIP2	ENST00000530266.1;ENST00000421577.2;ENST00000443524.2;ENST00000451739.2;ENST00000451739.2;ENST00000532505.1;ENST00000532081.1;ENST00000531058.1	5'UTR;5'UTR;5'UTR;5'UTR;1stExon;5'UTR;TSS200;TSS200	NA	TRUE
cg00580978	0.293254	0.0751186	5.91459e-06	0.0003135	chr12	72667386	+	chr12:72665683-72667551	Island	CGGGGAGAGAAGGTATGGAGGGAGGCGGTGCCCCGCGCTGCCCCACCCCGGCGCGCGGCT[CG]AACCTCTGGGCGGCCTGCGACCCCGGGGACCCAGCTGGCTTCCAATACCCGGGAAGCCAG	GTATTGGAAGCCAGCTGGGTCCCCGGGGTCGCAGGCCGCCCAGAGGTTCG	LOC283392;LOC283392;TRHDE	NR_026836;NR_026837;NM_013381	TSS200;TSS200;Body			DMR	NA	12:70951635-70954351			AC087886.1	ENST00000426250.2	TSS200	AC087886.1;TRHDE;AC087886.1;AC087886.1;TRHDE	ENST00000435350.1;ENST00000552503.1;ENST00000552396.1;ENST00000426250.2;ENST00000548156.1	TSS1500;TSS1500;3'UTR;TSS200;5'UTR	NA	TRUE
cg00581731	0.331639	0.0841064	1.65092e-06	0.000118786	chr2	101435167	-	chr2:101434979-101437453	Island	GGCCCTAGGAGACCCCTTCTGGCCACAAAATCGAGTATGACAGAAAAGGGCCAGCGGGGG[CG]CTTTCCTTCCAGGGCCACTTGCCGGAATGTAAGAGGGACGGAGAGACGTCCGGAAAAGGC	CGCCCCCGCTGGCCCTTTTCTGTCATACTCGATTTTGTGGCCAGAAGGGG	NPAS2	NM_002518	TSS1500				NA	2:100801422-100801990	2:101434986-101435635	Unclassified	NPAS2	ENST00000335681.5	TSS1500	NPAS2	ENST00000335681.5	TSS1500	NA	TRUE
cg00584683	0.724911	0.481667	6.59515e-07	5.95129e-05	chr2	101435094	+	chr2:101434979-101437453	Island	ACGAGACAGCGAGAGGAACAGCGTCCGGGGCGACCCCCAGTCCACCGCGGGGGCCTGGCG[CG]CTTGGGGCAAAGGCCCTAGGAGACCCCTTCTGGCCACAAAATCGAGTATGACAGAAAAGG	TACTCGATTTTGTGGCCAGAAGGGGTCTCCTAGGGCCTTTGCCCCAAGCG							NA	2:100801422-100801990	2:101434986-101435635	Unclassified							NA	TRUE
cg00586365	0.336326	0.0439784	2.85933e-06	0.00017995	chr5	132948251	+	chr5:132946744-132948467	Island	TGCCCGCTGCTGTGCCACCGCCGCCGCGGCTGCCCTATTTCTGCCGCCGGGACCGGAGCC[CG]TGACGTCACCCTCTGGGCCCCGCCTGCCCAATCGCCGCCACCTGTGCGCGCCGCCCGCCC	CGCACAGGTGGCGGCGATTGGGCAGGCGGGGCCCAGAGGGTGACGTCACG	FSTL4	NM_015082	TSS200			DMR	NA	5:132974556-132976366			FSTL4;FSTL4;FSTL4	ENST00000265342.7;ENST00000360575.5;ENST00000265342.7	1stExon;TSS200;5'UTR	FSTL4;FSTL4;FSTL4	ENST00000265342.7;ENST00000360575.5;ENST00000265342.7	1stExon;TSS200;5'UTR	NA	TRUE
cg00586764	0.383816	0.547842	1.43152e-07	1.94177e-05	chr1	6860778	-		OpenSea	TATTAAAATCTATCGATTCCCAGTAATTCAGTAAATGAAGACTCTTCCTATTTAGAAACT[CG]TGTGGATTGGGGAGTTGCTGTGGGCCCACTGTCATTGATCATATCACATCTTCACTTGAA	TCGATTCCCAGTAATTCAGTAAATGAAGACTCTTCCTATTTAGAAACTCG	CAMTA1;CAMTA1;CAMTA1;CAMTA1	NM_001195563;NR_038934;NM_001242701;NM_015215	Body;Body;Body;Body				NA				CAMTA1	ENST00000476163.1	5'UTR	CAMTA1;CAMTA1	ENST00000490738.1;ENST00000476163.1	5'UTR;5'UTR	NA	NA
cg00590324	0.615369	0.19042	3.50572e-06	0.000209977	chr6	134212732	-	chr6:134212690-134213098	Island	GCTATTTGCTTTATGCAGCCGCAGGGTGCGCTAGGACCGGGAGTAAATTGCAGAGATAAC[CG]GTCTCTCCAGAGCACCGCCTGCCCCCACCGCCCCCCTTCCTTTCATCTCAGGCCCCGAGT	ATGCAGCCGCAGGGTGCGCTAGGACCGGGAGTAAATTGCAGAGATAACCG	TCF21;TCF21	NM_198392;NM_003206	Body;Body				NA	6:134254066-134254762	6:134212355-134212847	Unclassified_Cell_type_specific							NA	TRUE
cg00595035	0.206837	0.458017	3.96425e-07	4.06666e-05	chr21	22552077	+		OpenSea	CATTTTCAAGGGTAATAGACAGTTGTTTTCAGGTCAGTTTTTGCAAGTGCAGATGTAGGA[CG]TCATGGATTGACTCCGGTGTAAACTGCAGTGTCAGACATATCCCCAGGATGTAGCACAGT	CCTGGGGATATGTCTGACACTGCAGTTTACACCGGAGTCAATCCATGACG	NCAM2	NM_004540	Body				NA				NCAM2	ENST00000535285.1	5'UTR	NCAM2;NCAM2	ENST00000535285.1;ENST00000508782.1	5'UTR;5'UTR	NA	NA
cg00596989	0.385416	0.133812	4.34349e-06	0.000247849	chr13	28540498	+	chr13:28540356-28541279	Island	CCCCGACCCCGCGCCTGCTATGAAAGTAAAGGGAACTAACGCGACTTTCTCCGCGGTGGA[CG]CTCGGACACGCGTGACCGCCTCAAACCCACTCCAGGCTGCCATTGGTACTCGCCCCTTTT	CGCTCGGACACGCGTGACCGCCTCAAACCCACTCCAGGCTGCCATTGGTA	CDX2	NM_001265	Body		chr13:28540285-28540285		NA	13:27438357-27441600									NA	NA
cg00597949	0.39297	0.544296	3.96622e-06	0.000231539	chr10	29980953	+		OpenSea	ATCTGGAAGTTGGATCAGCCAATAAGCAACTGGAAACACAGGAAACAGGGGAATCCCTGC[CG]CAGCTCACTCAGCTAAGACACTGTCAACCTCAGTGAAGAACCTCAGTTGCTTTACAGCTA	AACTGAGGTTCTTCACTGAGGTTGACAGTGTCTTAGCTGAGTGAGCTGCG	SVIL	NM_003174	5'UTR		chr10:29980945-29980945		TRUE				SVIL;SVIL	ENST00000375398.2;ENST00000375400.3	5'UTR;5'UTR	SVIL;SVIL;SVIL	ENST00000375398.2;ENST00000375400.3;ENST00000465422.1	5'UTR;5'UTR;3'UTR	NA	NA
cg00601666	0.575399	0.747961	1.16972e-05	0.000530387	chr1	75155325	-		OpenSea	CTCTGGACCATGTTTTTCCTTTGAGCTCTCCTGCTAAAATACCAAACACAATTTGCTTTT[CG]CTTGTGAGATGGAAAGAAACAGTTGTGTGGCTATAGCTGTCATTTTGCCATTACCATTCT	TTTTTCCTTTGAGCTCTCCTGCTAAAATACCAAACACAATTTGCTTTTCG							NA				RP11-17E13.3	ENST00000449696.1	3'UTR	RP11-17E13.3	ENST00000449696.1	3'UTR	NA	NA
cg00602115	0.531491	0.794389	1.28587e-05	0.000571057	chr18	32398987	+		OpenSea	GGAAATGTGACTCCATGTGCTCACTGTTCAAATGGATTATGATTTACTGATGTTTATCTT[CG]TTAAACTCAAAGATCAGTTCCAGCAATGTTGCCCTCGTGCATCTCTTCAAGGATTGGTTT	GAAGAGATGCACGAGGGCAACATTGCTGGAACTGATCTTTGAGTTTAACG	DTNA;DTNA;DTNA;DTNA;DTNA;DTNA;DTNA;DTNA;DTNA	NM_032980;NM_001390;NM_001128175;NM_032979;NM_001392;NM_032975;NM_032978;NM_032981;NM_001391	5'UTR;Body;Body;Body;Body;Body;Body;5'UTR;Body				NA				DTNA;DTNA;DTNA;DTNA	ENST00000269192.7;ENST00000450377.1;ENST00000556414.1;ENST00000399097.3	5'UTR;5'UTR;5'UTR;5'UTR	DTNA;DTNA;DTNA;DTNA	ENST00000269192.7;ENST00000450377.1;ENST00000556414.1;ENST00000399097.3	5'UTR;5'UTR;5'UTR;5'UTR	NA	TRUE
cg00613551	0.283777	0.51007	7.78364e-06	0.00038822	chr12	114122162	-		OpenSea	CCAAAGTCACCCCCGTCAGTGCTTATGTCAGAGACAGCTCCAGCTGGAGGTCTGGGCTTT[CG]TCTGCCACCGGGCATTTGTTTTGGTGTGGTTTGCACCGTGACTCAGCCAGAGCCTGATCA	CCGTCAGTGCTTATGTCAGAGACAGCTCCAGCTGGAGGTCTGGGCTTTCG							NA				RP11-438N16.1	ENST00000550905.1	3'UTR	RP11-438N16.1	ENST00000550905.1	3'UTR	NA	NA
cg00615913	0.202689	0.417969	2.42355e-05	0.000932458	chr20	37063096	-	chr20:37063525-37064106	N_Shore	TTTGCCAGACAGTTCTCAGAACTCAGAACTGGCTGAGCTCATTGACTGTCCCCTCTACTG[CG]TCCCACAGAAGGGTCCTTCCCCAAGGTGCGCAGAAGCAGCGGCACTTACCCAGGGGCATT	CGCAGTAGAGGGGACAGTCAATGAGCTCAGCCAGTTCTGAGTTCTGAGAA	LOC388796;SNORA71D;LOC388796	NR_027241;NR_003018;NR_015366	Body;TSS1500;Body				NA				SNORA71D	ENST00000363484.1	TSS1500	SNORA71D;RP4-564F22.2;RP4-564F22.2;RP4-564F22.2;RP4-564F22.2;RP4-564F22.2;RP4-564F22.2	ENST00000363484.1;ENST00000436764.1;ENST00000414142.1;ENST00000417578.1;ENST00000413755.1;ENST00000456953.1;ENST00000424235.1	TSS1500;3'UTR;3'UTR;3'UTR;3'UTR;3'UTR;3'UTR	NA	TRUE
cg00618725	0.453603	0.201122	1.07237e-05	0.000495651	chr10	131265159	-	chr10:131264948-131265710	Island	TACGGGCCATTTGGCAAACTAAGGCACAGAGCCTCAGGCGGAAGCTGGGAAGGCGCCGCC[CG]GCTTGTACCGGCCGAAGGGCCATCCGGGTCAGGCGCACAGGGCAGCGGCGCTGCCGGAGG	CGGGCGGCGCCTTCCCAGCTTCCGCCTGAGGCTCTGTGCCTTAGTTTGCC	MGMT	NM_002412	TSS1500			DMR	NA	10:131154946-131155700	10:131264590-131266281	Promoter_Associated	MGMT	ENST00000306010.7	TSS1500	MGMT;MGMT;MGMT	ENST00000306010.7;ENST00000482653.1;ENST00000482547.1	TSS1500;TSS1500;TSS1500	NA	TRUE
cg00621805	0.656294	0.832352	7.69872e-06	0.000384766	chr7	73981215	-		OpenSea	AGGGCAGGCTCTACCACTAGCCTAGGGCTTGTTGTGTGTCCCTGAAGTGGGTTGCAGCCA[CG]CCCTCTTTCCCACCACCCCTCTGGTCTCATCCACACAGGGTGGCTCTTTGCTGTCCCCTC	ACCACTAGCCTAGGGCTTGTTGTGTGTCCCTGAAGTGGGTTGCAGCCACG	GTF2IRD1;GTF2IRD1;GTF2IRD1	NM_001199207;NM_005685;NM_016328	Body;Body;Body				NA		7:73980970-73981954	Unclassified							NA	NA
cg00624440	0.840605	0.677007	6.22759e-06	0.000326322	chr16	88223064	+	chr16:88220021-88220541	S_Shelf	GGTCTCTCATGGTCTCTCTCTGACTGGAGTTGGGGAAGGATATTTGGACACCTGGACATG[CG]TGTCTGCATGCCCCTGGGACGTGCTCTCTAGAAAAGCACTGGGCACGTTCATTTATCCAC	ACGTGCCCAGTGCTTTTCTAGAGAGCACGTCCCAGGGGCATGCAGACACG							NA										NA	TRUE
cg00624484	0.330519	0.618332	7.4362e-06	0.000374432	chr19	42522851	+		OpenSea	ACAAAGCAAGACTCTGTCTCAAAAAAAAGCGGGGGGGGGGGGGGGGGGGAGGAAAAGAAA[CG]TTAACTCCTGAGGCAGAGCTGTCCTGAATAGTGACAAGCCCTCAGGTGTGGCTGCAGGAG	CACCTGAGGGCTTGTCACTATTCAGGACAGCTCTGCCTCAGGAGTTAACG	GRIK5;GRIK5	NM_002088;NM_001301030	Body;Body				NA										NA	NA
cg00625670	0.614506	0.768206	2.5935e-05	0.000982504	chr1	78720303	+		OpenSea	GTTCAACTCCCATAAGTTGGATTTTTTAAAGCTGCTAAATTTGTGGTAATTGTTACTCAT[CG]ATAGAAAAGTAATACAAGACCTCAAATCCTGACCAGTCTGTGGGTAGTAATCTCATAAAA	ACTACCCACAGACTGGTCAGGATTTGAGGTCTTGTATTACTTTTCTATCG	MGC27382	NR_027310	Body				NA				RP11-183M13.1	ENST00000436742.1	5'UTR	RP11-183M13.1;RP11-183M13.1	ENST00000436742.1;ENST00000413519.1	5'UTR;5'UTR	NA	NA
cg00629957	0.199826	0.0807394	1.72309e-06	0.000122556	chr11	1358151	-	chr11:1357626-1359081	Island	GGGATGGGGACAAGGTAGGGGTCGTGGGGCGCTGGGCTCACCCCAGGCCCTCAGGTGTCT[CG]AGATGGCCCGGGCTCCGAGCGCTCCCGGCGCTTACGCTAGAGCCTCCTCCTGTGCGAAAC	CGAGACACCTGAGGGCCTGGGGTGAGCCCAGCGCCCCACGACCCCTACCT					chr11:1357863-1357863		NA	11:1313827-1315633									NA	NA
cg00630543	0.424574	0.758384	8.82276e-08	1.36143e-05	chr6	114111588	-		OpenSea	GGTGCAAGCCCTCATTTCACAGATACAGAAGCTAGACCCAAAGGGTTCCTGAGAGCTGCT[CG]GGGATGCTGGGTTAAACATTAGAAGCAGTTGGTCAGACAGAAGACCACTGTGCTGTGTGC	CATTTCACAGATACAGAAGCTAGACCCAAAGGGTTCCTGAGAGCTGCTCG							NA				RP1-249H1.2	ENST00000456424.1	TSS1500	RP1-249H1.2	ENST00000456424.1	TSS1500	NA	NA
cg00631551	0.366942	0.659595	4.28784e-08	8.08252e-06	chr1	9974870	-		OpenSea	CTCTCTGCCAGCATGCCCCCCAAGTGTTAGTCTCTGTAGCATCTGATGAGTAGATCTTCC[CG]ACATCACAGAACCCAGCTTTTATGTGTTTGGGAACAGTATAAAGAAATAATTATTCATTT	CGGGAAGATCTACTCATCAGATGCTACAGAGACTAACACTTGGGGGGCAT							NA										NA	NA
cg00635259	0.423321	0.686604	1.63584e-06	0.000118047	chr17	62159682	-		OpenSea	GGAAACAGGAAGAACTTTCAGTCAGTAAGCACATGTTTATCTTTCCCATTAATCACCTCT[CG]GTACACTCTCACAAACAGACTGATGCAAGAGACAGGAAATAAAGGCACACCACACTCATC	AACTTTCAGTCAGTAAGCACATGTTTATCTTTCCCATTAATCACCTCTCG	ERN1	NM_001433	Body		chr17:62159440-62159440		NA		17:62159575-62159984	Unclassified							NA	NA
cg00637477	0.777057	0.635688	5.05753e-06	0.000278122	chr20	62525797	-	chr20:62525796-62526638	Island	AGGAGCACCGGCCGCAGAGGTCTGGGAGCTTCTAGGATGGGAAGTGGCCCAGGCAGCCTA[CG]CGGGGCAGGCCGTCAGTGAGTGGCGGAGCGCCTGCAGTTACAGGGACAGGGAAGGGTGGC	CGCAGAGGTCTGGGAGCTTCTAGGATGGGAAGTGGCCCAGGCAGCCTACG	DNAJC5	NM_025219	TSS1500				NA	20:61996172-61996576			DNAJC5;DNAJC5	ENST00000369911.2;ENST00000360864.4	TSS1500;TSS1500	DNAJC5;DNAJC5	ENST00000369911.2;ENST00000360864.4	TSS1500;TSS1500	NA	TRUE
cg00637826	0.522553	0.755387	7.72483e-07	6.71156e-05	chr12	12673150	-		OpenSea	ACAGACACATACAAAACTCTTAAAAACCAAAATGATGCTATTTCTGTGTAGGTGATCTCA[CG]ATTCCCTGGTTTTAAATCCTTTATACTATAAAATGGTAAAGTTCATAATAAACCAAACAA	CGTGAGATCACCTACACAGAAATAGCATCATTTTGGTTTTTAAGAGTTTT	DUSP16	NM_030640	Body				TRUE										NA	TRUE
cg00639080	0.386478	0.60328	2.22533e-06	0.000149067	chrX	114597919	+		OpenSea	GAAACTCAATACAACCTGGTTTTACAGATGTGAGGATAATGATATGGCATATTCAAAGGA[CG]TAGAAAGGAGTTAGGAACTGGCAAAAGAGTTTAAACCATCAAGAGTAGCTCCGTTGTATG	CTACTCTTGATGGTTTAAACTCTTTTGCCAGTTCCTAACTCCTTTCTACG							NA										NA	NA
cg00642970	0.682274	0.828086	6.07949e-06	0.000320408	chr8	125953928	-		OpenSea	TTGTCATGAAAACTGCTTCCCAGTTTGTTAAATTCTTATGCAGGTCTCCAGTGTCAGAAA[CG]CTGAGTATCACTAATCTCAAGACCTTCTCTCTGCTATACGAGCTCTGGCAGAGCTTGTCT	CTGCTTCCCAGTTTGTTAAATTCTTATGCAGGTCTCCAGTGTCAGAAACG	LOC157381	NR_027321	TSS1500				NA				RP11-1082L8.2;RP11-6D1.6	ENST00000531948.1;ENST00000510897.2	3'UTR;TSS1500	RP11-1082L8.2;RP11-6D1.6;RP11-6D1.6;RP11-6D1.6;RP11-6D1.6	ENST00000531948.1;ENST00000510897.2;ENST00000533286.1;ENST00000528090.1;ENST00000529135.1	3'UTR;TSS1500;TSS1500;5'UTR;5'UTR	NA	TRUE
cg00643896	0.150584	0.0403262	2.74384e-06	0.000174257	chr15	57884038	-	chr15:57883998-57884358	Island	AGGATGGTGCTCAACTTTAACCGGGTCGGCGCCCTCGGGAGAAAATGCAGCCTGACGGGT[CG]GGTGAGCGCGCTCGGCCCCGCCCCGGCCCGGCCCGGCCCCGCCCCCGGCCCCACCCCCGG	AACTTTAACCGGGTCGGCGCCCTCGGGAGAAAATGCAGCCTGACGGGTCG	GCOM1;GCOM1;GCOM1;GCOM1	NM_001018100;NM_001018090;NM_001018091;NM_152451	TSS200;TSS200;TSS200;TSS200				NA	15:55671291-55671650	15:57883364-57884938	Unclassified_Cell_type_specific	GCOM1;GCOM1;GCOM1;GCOM1	ENST00000380569.2;ENST00000380560.2;ENST00000267853.5;ENST00000380565.4	TSS200;TSS200;TSS200;TSS200	GCOM1;GCOM1;GCOM1;GCOM1	ENST00000380569.2;ENST00000396180.1;ENST00000267853.5;ENST00000380565.4	TSS200;TSS200;TSS200;TSS200	NA	TRUE
cg00645339	0.457782	0.0254724	1.0605e-08	2.96007e-06	chr15	45670875	-	chr15:45669970-45671029	Island	TGCCGGGAACAGGTGGTGGGGCCGGCGTAGCGCCCCGAATTAGGAACTGTCGGGAAGCGC[CG]CGGCCGCTGGCTCGAGCCTCCGATGCTTGCCCTTTTTTAGCCAGCGGGGCCACTGACGGC	GTGGTGGGGCCGGCGTAGCGCCCCGAATTAGGAACTGTCGGGAAGCGCCG	LOC145663;GATM;GATM	NR_033252;NM_001482;NM_001482	TSS200;1stExon;5'UTR	high-CpG:43457916-43458250			NA	15:43457304-43458294	15:45669693-45671628	Unclassified	GATM;GATM;GATM;GATM	ENST00000396659.3;ENST00000396659.3;ENST00000558336.1;ENST00000560538.1	1stExon;5'UTR;TSS200;3'UTR	GATM;GATM;GATM;GATM;GATM;GATM;GATM;GATM;GATM	ENST00000558537.1;ENST00000396659.3;ENST00000396659.3;ENST00000558118.1;ENST00000558163.1;ENST00000558362.1;ENST00000558336.1;ENST00000561148.1;ENST00000560538.1	TSS1500;1stExon;5'UTR;TSS200;TSS200;TSS200;TSS200;5'UTR;3'UTR	NA	TRUE
cg00647067	0.491204	0.668648	4.51473e-08	8.39611e-06	chr1	62218696	+		OpenSea	ATTTATTTGAAGTACTGGTGGAGAGCAACCATTATTCTTTGGCTAGGAAAGTTTGTTTTT[CG]TTTAATCAGTACCTCATAAATGCTGAGCTTTGAGGACAAAGGAATGATAATTAGACACAT	ATCATTCCTTTGTCCTCAAAGCTCAGCATTTATGAGGTACTGATTAAACG	INADL	NM_176877	5'UTR				NA				INADL;INADL	ENST00000316485.6;ENST00000255202.9	5'UTR;5'UTR	INADL;INADL;INADL;INADL	ENST00000316485.6;ENST00000255202.9;ENST00000459752.1;ENST00000484562.1	5'UTR;5'UTR;5'UTR;5'UTR	NA	NA
cg00650856	0.802571	0.242442	9.1241e-06	0.000437992	chr4	4389720	-	chr4:4387593-4389919	Island	ATGCTGGGCGGGGGAGGGGAGCCCTGCCTTAGATGATATTCTCGTCCTGACAGTGGAACG[CG]GTGGGGCAAGATTCCTTCGCGTTTTTCCTGGGAGCCTCATCCGAGAGGGCCCTGGCCCCG	CGCGTTCCACTGTCAGGACGAGAATATCATCTAAGGCAGGGCTCCCCTCC	D4S234E;D4S234E	NM_014392;NM_001040101	Body;Body			DMR	NA	4:4438495-4440820									NA	TRUE
cg00651759	0.678855	0.798225	1.85675e-06	0.000129905	chr1	88870042	-		OpenSea	AAAGCTATTGTATCAAGTATAAACTATGCCAAAATGAACAAGTTTTCCCAACTTCTGAAC[CG]GCTTATACATCACCATTTTGTTTTGACAAATTAAGTTTAAAACATTTTGAGTGATTAAAA	TCAAGTATAAACTATGCCAAAATGAACAAGTTTTCCCAACTTCTGAACCG							TRUE										NA	TRUE
cg00651782	0.734483	0.354442	1.46881e-10	1.40652e-07	chr12	113902673	-	chr12:113900750-113906442	Island	TGTAGGGACTCCGGATTGCAAACCCATTCTGCCTCAACAAATCTGTATCAACTCTCTGAC[CG]CCCCACATAGCCCCTTTTCCAGAACCTTCGGGATATCCTGCCTTCCCCCACCAGGTGGGG	GGATTGCAAACCCATTCTGCCTCAACAAATCTGTATCAACTCTCTGACCG	LHX5	NM_022363	Body				NA	12:112387056-112387345									NA	TRUE
cg00665827	0.626518	0.755249	1.75659e-11	2.83753e-08	chr1	7293835	-		OpenSea	GAGAGCAATGTTCGGAATTCTCGGAGGATCCACAAAGCCCCGGGATCTAACCCCTCTGGA[CG]TGCAGTTCCCTTTGTCTGGAAGGCGCCTCTCCCCGTTCTTTTTGGCTGACTTTTACTCTC	CGTCCAGAGGGGTTAGATCCCGGGGCTTTGTGGATCCTCCGAGAATTCCG	CAMTA1	NM_015215	Body				NA	1:7216422-7216522									NA	TRUE
cg00669856	0.159212	0.508359	8.59474e-06	0.000418341	chr4	124317779	+	chr4:124318307-124319998	N_Shore	AAACTGCATTTGCAGAATTTTTAGAGGCACTCCCGAAGTTTTAAGAGGATGTTTATTACA[CG]AGTCTGTAGGGCAACATTTCCAAGTTGGTACACATAAACGAAAGAGGAAACGATAGTTAA	CGAGTCTGTAGGGCAACATTTCCAAGTTGGTACACATAAACGAAAGAGGA	SPRY1	NM_199327	TSS200				NA		4:124317529-124318299	Promoter_Associated	SPRY1;SPRY1	ENST00000339241.1;ENST00000515726.1	TSS200;TSS200	SPRY1;SPRY1;SPRY1	ENST00000505319.1;ENST00000339241.1;ENST00000515726.1	TSS200;TSS200;TSS200	TRUE	TRUE
cg00672759	0.669743	0.848261	2.70164e-07	3.07169e-05	chr18	21283060	-		OpenSea	GCTACTTCTATGACTGCTGCAGCACTGTCTATGGCTAGTGGTGCACCCATATGTGCCAGT[CG]TCACTGCCTCTGAGGTTCCCAGACTGCAGTGGGCAGAAGAATCCTTTGGAGTGCTTTTAT	CGACTGGCACATATGGGTGCACCACTAGCCATAGACAGTGCTGCAGCAGT	LAMA3;LAMA3;LAMA3;LAMA3	NM_001302996;NR_130106;NM_001127717;NM_198129	Body;Body;Body;Body				NA		18:21282980-21283336	Unclassified_Cell_type_specific							NA	NA
cg00673365	0.635152	0.384368	2.65456e-05	0.000999935	chr12	113906437	-	chr12:113900750-113906442	Island	TGCCCGCCCACTCTCTCCAGGCGGGGCTGGGCCTTTGGAGGGGCGCTCTTAAGCCCTCTC[CG]CGCGTCTCAGCTAGTACCTGGGTAAGGGTAGGGGGACGCGTACCCTCTGGAGAACTCCCA	CTCTCCAGGCGGGGCTGGGCCTTTGGAGGGGCGCTCTTAAGCCCTCTCCG	LHX5	NM_022363	Body				TRUE										NA	TRUE
cg00674056	0.527946	0.670911	1.70542e-07	2.20668e-05	chr1	35315844	-		OpenSea	GGGAATAAGGGCCCTAAGGACTTTGGATTCTTCTACATGGAAAAGGTGCCCTTGCTGGGG[CG]CTAGTAAAGATTTTTTTAAATCTGAATAATTAGAAGGGCCCATTAGGCATTTTTTAACAA	CGCCCCAGCAAGGGCACCTTTTCCATGTAGAAGAATCCAAAGTCCTTAGG							NA				RP5-997D16.2	ENST00000429293.1	TSS1500	RP5-997D16.2	ENST00000429293.1	TSS1500	NA	NA
cg00677901	0.285215	0.592556	5.73093e-08	9.99379e-06	chr16	88017247	-	chr16:88018631-88018954	N_Shore	TCAGGACCAAATCCCAAGTCAGGGCCACAGGGGGTCCCGTCACCTTTTCCCATTAGGCAG[CG]GGCTGTGAGGCGAATGTGCGTGGCCTGTGGCTTTTATGCTGTGTCGATGTTAGGTGTAAT	CCCAAGTCAGGGCCACAGGGGGTCCCGTCACCTTTTCCCATTAGGCAGCG	BANP;BANP	NM_017869;NM_079837	Body;Body				NA	16:86574556-86574769	16:88016006-88017655	Unclassified_Cell_type_specific				BANP;BANP;BANP;BANP;BANP;BANP	ENST00000472964.1;ENST00000569400.1;ENST00000488074.1;ENST00000474563.2;ENST00000485772.1;ENST00000459966.1	5'UTR;5'UTR;5'UTR;5'UTR;3'UTR;3'UTR	NA	TRUE
cg00679256	0.31251	0.505893	2.24287e-07	2.68467e-05	chr10	107710219	-		OpenSea	GCTGGTAAGAGACTCTTCACTTTATGTCAACCAAATAGATTTTGCATCCCAAAGGCCCTG[CG]TGATCTTCATGTTCATACCCTTGAGAATGATAGAAGCTTCTACTCTATGTGGTGTGCTCT	CGCAGGGCCTTTGGGATGCAAAATCTATTTGGTTGACATAAAGTGAAGAG							NA		10:107710144-107710407	Unclassified_Cell_type_specific							NA	NA
cg00679738	0.449807	0.0617977	3.15666e-12	7.62941e-09	chr1	231175246	-	chr1:231175062-231176317	Island	AGGGGGCCGGGCTGTTCCAATCTGCTGTCTACACTGGCGGCGGACAAAAGTTGTCCTCTT[CG]TGGTAGGAAAACGCAATCGCGTTAATCCGTTGGGCCGCTGTGAAAGCCTTTCCCCCACCG	TGTTCCAATCTGCTGTCTACACTGGCGGCGGACAAAAGTTGTCCTCTTCG	FAM89A	NM_198552	Body				NA	1:229241686-229243632									TRUE	TRUE
cg00681018	0.182268	0.595702	1.14636e-07	1.65226e-05	chr3	107318106	-		OpenSea	CCTTGCTATTAGATGAAACTGTCAATAAGTAACTAGAAGCAGCCAGTACTGTCTGTGCTT[CG]CTCTCTCCCCCAGCTGAGTTCCTTTCTGCTCCGCCCCATCCCTGCTCTCTGCTGCTCAGA	ATGAAACTGTCAATAAGTAACTAGAAGCAGCCAGTACTGTCTGTGCTTCG	BBX;BBX;BBX	NM_001142568;NM_001276286;NM_020235	5'UTR;5'UTR;5'UTR				TRUE		3:107317981-107318368	Promoter_Associated_Cell_type_specific	BBX;BBX;BBX;BBX;BBX;BBX	ENST00000406780.1;ENST00000415149.2;ENST00000325767.5;ENST00000402543.1;ENST00000325805.8;ENST00000416476.2	TSS200;5'UTR;5'UTR;5'UTR;5'UTR;5'UTR	BBX;BBX;BBX;BBX;BBX;BBX;BBX;BBX;BBX;BBX;BBX;BBX;BBX;BBX	ENST00000406780.1;ENST00000415149.2;ENST00000325767.5;ENST00000402543.1;ENST00000325805.8;ENST00000485939.1;ENST00000427402.1;ENST00000416476.2;ENST00000454540.1;ENST00000431630.1;ENST00000456817.1;ENST00000437908.1;ENST00000456419.1;ENST00000402163.2	TSS200;5'UTR;5'UTR;5'UTR;5'UTR;5'UTR;5'UTR;5'UTR;5'UTR;5'UTR;5'UTR;5'UTR;5'UTR;5'UTR	NA	NA
cg00684594	0.507198	0.705531	4.4747e-07	4.44938e-05	chr11	57519470	+	chr11:57520333-57520753	N_Shore	GTGTACTTGACCAAAGCGAGCCTGACTGACCCTGGTAGTAGGCAAAGAATTTGGCCTTTA[CG]TTTGTATAGTTAATTACCAGGCTAACAATGCAGCAAGGATAGTAAAGCATTTTACCCCTC	CGTTTGTATAGTTAATTACCAGGCTAACAATGCAGCAAGGATAGTAAAGC	BTBD18	NM_001145101	TSS1500				TRUE		11:57519121-57519670	Unclassified	BTBD18;CTNND1;CTNND1;BTBD18;RP11-691N7.6	ENST00000436147.2;ENST00000524630.1;ENST00000529919.1;ENST00000422652.1;ENST00000531074.1	TSS1500;TSS1500;TSS1500;TSS1500;3'UTR	BTBD18;CTNND1;CTNND1;CTNND1;BTBD18;RP11-691N7.6	ENST00000436147.2;ENST00000524630.1;ENST00000529919.1;ENST00000533189.1;ENST00000422652.1;ENST00000531074.1	TSS1500;TSS1500;TSS1500;TSS1500;TSS1500;3'UTR	NA	TRUE
cg00685585	0.707203	0.828914	2.61209e-08	5.63749e-06	chr1	29503379	-		OpenSea	AAACAGACCACAACATCCCCTGAAAATTCAGGCTATTCATGATTTCACTGTTCCATGAAA[CG]CAGGTTCTGAAGTTTAAATCCAAGTTTCCCTTGAGAGTTTTAATTCATGACTTGAACTAA	ACATCCCCTGAAAATTCAGGCTATTCATGATTTCACTGTTCCATGAAACG	SRSF4	NM_005626	Body				NA				SRSF4	ENST00000466448.1	3'UTR	SRSF4	ENST00000466448.1	3'UTR	NA	NA
cg00685795	0.168462	0.505417	5.8599e-06	0.000311429	chr17	40713781	-	chr17:40714087-40715282	N_Shore	TCCATCTGTGAAATGGGTACGTGGACAGACCTGTCCAGTAGCCTCCCATGTGAGAATCCT[CG]GACTGAGAGGGTACTAGGAGGGCTAATACAGCGCAGCCCTGTGATTCCCCACCTCTGTCC	ATGGGTACGTGGACAGACCTGTCCAGTAGCCTCCCATGTGAGAATCCTCG	COASY;COASY;COASY;COASY;COASY	NM_001042532;NM_025233;NM_001042530;NM_001042529;NM_001042531	TSS1500;TSS1500;TSS1500;TSS1500;TSS1500				NA		17:40713670-40714889	Promoter_Associated	COASY;COASY	ENST00000421097.1;ENST00000426807.2	TSS1500;TSS1500	COASY;COASY	ENST00000421097.1;ENST00000426807.2	TSS1500;TSS1500	NA	TRUE
cg00687889	0.692145	0.807455	4.34083e-06	0.000247795	chr1	33515863	-	chr1:33516594-33516933	N_Shore	AAAATATCTTATTGTGCTCTGCTCACCCTTCTTGTGATCTGTTGATCTGATAAATAGGAC[CG]CTACTAAGCTACTAGCTGGTGGGTGGTGTATACAGCATGGATACGCTGGACAAAGGGATG	CGGTCCTATTTATCAGATCAACAGATCACAAGAAGGGTGAGCAGAGCACA					chr1:33515825-33515825		NA							AK2	ENST00000548559.1	3'UTR	NA	NA
cg00689425	0.706483	0.81028	1.78656e-05	0.000735878	chr1	113582591	+		OpenSea	TCCAGAAAAAGCAAAGTCATTATATGACAACTTGAAGCAAAAAGAAGGTGAAATCTAAAG[CG]AGAGAATTTAATGCTAGCAAATGATTGTTTGGTAATTTTAGAAAGAGGTTTGGGTTTAAA	CCTCTTTCTAAAATTACCAAACAATCATTTGCTAGCATTAAATTCTCTCG	LOC100996251	NR_103777	Body				NA				RP11-389O22.1;RP11-389O22.1;RP11-31F15.2	ENST00000451149.1;ENST00000413231.1;ENST00000421157.1	5'UTR;5'UTR;3'UTR	RP11-389O22.1;RP11-389O22.1;RP11-31F15.2	ENST00000451149.1;ENST00000413231.1;ENST00000421157.1	5'UTR;5'UTR;3'UTR	NA	NA
cg00697703	0.627305	0.383302	1.7105e-05	0.000710096	chr7	25018855	+	chr7:25018999-25020255	N_Shore	GACCCTGAACTAAGACGCTGCAGGGCCTCCAGGAAAGGACCAATGTGAGAGACACTGAGA[CG]AGAGTTAGGGTGAGCCTGAAGGTGATCTGAACAGTAGTAATTGGAAACTAACAAAAAAAA	GTTTCCAATTACTACTGTTCAGATCACCTTCAGGCTCACCCTAACTCTCG	OSBPL3;OSBPL3;OSBPL3;OSBPL3	NM_015550;NM_145322;NM_145320;NM_145321	5'UTR;5'UTR;5'UTR;5'UTR				NA		7:25018388-25019482	Promoter_Associated	OSBPL3;OSBPL3	ENST00000352860.1;ENST00000313367.2	5'UTR;5'UTR	OSBPL3;OSBPL3;OSBPL3	ENST00000352860.1;ENST00000313367.2;ENST00000415952.1	5'UTR;5'UTR;5'UTR	NA	TRUE
cg00698685	0.32285	0.128392	1.71192e-05	0.000710639	chr5	174871341	+	chr5:174870753-174872345	Island	GCGACAGCCGCACGTGGTCCCCCTGGATGGTTCTGCGGGCGAGGTGGGCGGAGGACGCCC[CG]GTGAGTGCTTGCCCTCCCTGGTTACCTCGCCAGTCTCCGGATCCCCGCGCAGCACGCGCA	GCGGGGATCCGGAGACTGGCGAGGTAACCAGGGAGGGCAAGCACTCACCG	DRD1	NM_000794	TSS200			DMR	NA	5:174803286-174804951	5:174870875-174872475	Unclassified	DRD1;DRD1	ENST00000329144.2;ENST00000393752.1	TSS1500;TSS200	DRD1;DRD1	ENST00000329144.2;ENST00000393752.1	TSS1500;TSS200	NA	TRUE
cg00705916	0.627583	0.797996	6.12682e-08	1.04555e-05	chr1	31288481	+		OpenSea	CAGCAAACTGGGAATAAGAATCCTGTGTCATGGGGTTGTCATAAGGGGGAAATGAGATGA[CG]TAAGTGCAGTTCTTAGCATAATAAATGCATTCAAAGCAAATAAAAAGTGCTCAGTAAATG	ACTTTTTATTTGCTTTGAATGCATTTATTATGCTAAGAACTGCACTTACG							NA				RP5-1125N11.1	ENST00000440358.1	TSS200	RP5-1125N11.1	ENST00000440358.1	TSS200	NA	NA
cg00713477	0.217164	0.533097	1.51055e-06	0.000111208	chr18	43729015	-		OpenSea	CAGTCCTTCAAAGGCTATCCCTGGGATTCTGGGGCCAAAGTCAAATCACATGGTAAGATT[CG]CTCCCAAAAGGACAAGCCTAGCACTCAAACCACTCTCCTACTTTAGGCCTGGGGATTGCA	GGCTATCCCTGGGATTCTGGGGCCAAAGTCAAATCACATGGTAAGATTCG							NA		18:43728610-43729212	Unclassified_Cell_type_specific							NA	NA
cg00715122	0.557497	0.80157	2.44128e-05	0.000937755	chr8	59904538	+		OpenSea	GGCAGCCCGCGTTATCAGCGTGCTCATCTTGGCCTCGGCAGGGCTGACGCGTGGTGGAGA[CG]CCGGAGCCCTCGTTACACTAGTTTTACCTGGCAGGCAGTGCTAGGTCTGCGCAAAGATAA	CGCCGGAGCCCTCGTTACACTAGTTTTACCTGGCAGGCAGTGCTAGGTCT	TOX	NM_014729	Body				TRUE				RP11-328K2.1;TOX	ENST00000518011.1;ENST00000456290.2	3'UTR;5'UTR	RP11-328K2.1;TOX	ENST00000518011.1;ENST00000456290.2	3'UTR;5'UTR	NA	TRUE
cg00715848	0.586486	0.705089	8.09038e-06	0.000399862	chr16	11965253	+		OpenSea	GGCGAGTGGATCACTTGAGGTCAGAAGTTTGAGACCAGCCTGACCAATAGGGGGAAACCT[CG]TCTCCACTAAAGATACAAAAATTAACTGGGCCTCGTGGAGGGCTCCTGTAATCCCAGCTA	CAGGAGCCCTCCACGAGGCCCAGTTAATTTTTGTATCTTTAGTGGAGACG	GSPT1;GSPT1;GSPT1	NM_001130007;NM_001130006;NM_002094	3'UTR;3'UTR;3'UTR				NA				GSPT1;RP11-166B2.8	ENST00000434724.2;ENST00000574364.1	3'UTR;5'UTR	GSPT1;RP11-166B2.8	ENST00000434724.2;ENST00000574364.1	3'UTR;5'UTR	NA	NA
cg00717678	0.665978	0.856717	1.05282e-07	1.56117e-05	chr17	1554577	-	chr17:1551730-1553249	S_Shore	GTTGCCCTTGTCTGTGTTCTGGCGGCCCCATTCGTAGCCACTGGGGGTCAGCTTGTAGGC[CG]TCAGTGTACAGGAGCCTGGCGTGAAGCTGGGGGAGGAACGAGGACAGAGTAACAGCTCAG	CGGCCTACAAGCTGACCCCCAGTGGCTACGAATGGGGCCGCCAGAACACA	PRPF8;RILP	NM_006445;NM_031430	Body;TSS1500				NA		17:1554527-1554587	Gene_Associated_Cell_type_specific	RILP;PRPF8	ENST00000301336.6;ENST00000540177.1	TSS1500;3'UTR	RILP;PRPF8;PRPF8;PRPF8	ENST00000301336.6;ENST00000572723.1;ENST00000571958.1;ENST00000540177.1	TSS1500;3'UTR;TSS200;3'UTR	NA	TRUE
cg00720647	0.824392	0.489779	3.40853e-07	3.6424e-05	chr19	15002149	+		OpenSea	ACCCCCTCTCTGCTGGCCGAGAGCTTTCTTCTTTTCCCTCCAACCTCATCTTTGTGTCCA[CG]CTCCTTAATGTTCTTGGAGGTAGGACGAAGAACTCTGGGTTTTATCTCAGGCGAGAGACT	CGCTCCTTAATGTTCTTGGAGGTAGGACGAAGAACTCTGGGTTTTATCTC							NA										NA	NA
cg00723069	0.31115	0.7237	1.1611e-09	6.14315e-07	chr14	22938770	-		OpenSea	GGAGACTGGCAGCGCTGACGGTCATGTGACTGATTCAGCTGTGACTTCTAGAGGCAAATG[CG]CTCAGCCAAGGAAACTGCTATTGCTATTATGATTTTGGCCCCAATCCATCTTGAACTAAC	CGCTGACGGTCATGTGACTGATTCAGCTGTGACTTCTAGAGGCAAATGCG							NA				TRDV3	ENST00000535880.2	TSS200	TRDV3;AE000661.37;AE000661.37	ENST00000535880.2;ENST00000514473.2;ENST00000556777.1	TSS200;3'UTR;3'UTR	NA	NA
cg00723424	0.408164	0.622861	5.60347e-06	0.000301187	chr22	44526144	+		OpenSea	GGCTCTGTGCTGAGTGCTTGCAGTCACCCTCCCAGTGAACCATCTCACGATGCTCTGTGA[CG]TCGCTTTTGTTGTTTTGCAGAGTGGATCTATCAGTAAACACTGGAGTCTTAGAATCGAAG	CGTCGCTTTTGTTGTTTTGCAGAGTGGATCTATCAGTAAACACTGGAGTC	PARVB;PARVB;PARVB;PARVB	NM_001003828;NM_013327;NM_001243385;NM_001243386	Body;Body;Body;Body				NA										NA	NA
cg00733180	0.851973	0.697304	2.28689e-05	0.000893128	chr22	35101001	-		OpenSea	AAGAAAGTAGCATCCAAATTTGAAACACCATGTCCATTTCTCTGAGAAATAATACACTAA[CG]TGGGCAACTGACCTCTCCCCAGCCTACTATGTGTAAGGCTAATTGGCCCAGTGGCCAATT	TCCAAATTTGAAACACCATGTCCATTTCTCTGAGAAATAATACACTAACG							NA				RP1-288L1.5	ENST00000423712.1	TSS200	RP1-288L1.5	ENST00000423712.1	TSS200	NA	NA
cg00734966	0.298474	0.873864	1.69605e-17	3.70986e-13	chr11	34490888	+		OpenSea	CAGGCGCTCTGTGTGGTAGGCAGGGCAGGATTTATCTCCTTTTACTGGAGAGAATGGATA[CG]ACAGCTTGTAAATAGCAGAACTGGGCTGGAACCCTTGGCATTCTCCTTTCACATATGCTG	CGACAGCTTGTAAATAGCAGAACTGGGCTGGAACCCTTGGCATTCTCCTT	CAT	NM_001752	Body				NA				CAT	ENST00000534710.1	TSS1500	CAT	ENST00000534710.1	TSS1500	NA	NA
cg00737155	0.43187	0.0846234	1.47875e-06	0.000109486	chr19	7894254	+		OpenSea	TGGGAGGGCCTATCCCTCCCCACGATCACGGCGCGAACCGAGCTTTGATGGAGAAACACG[CG]GCTCTGTGAGCTTTAGAGAACACATTTAACCTGGCCTGGAGTAAGACAGGGGACGGGCCT	CGGCTCTGTGAGCTTTAGAGAACACATTTAACCTGGCCTGGAGTAAGACA	EVI5L	NM_145245	TSS1500				NA	19:7800216-7801408			EVI5L	ENST00000270530.3	TSS1500	EVI5L	ENST00000270530.3	TSS1500	NA	NA
cg00741410	0.664397	0.342838	3.06978e-07	3.37595e-05	chr1	6615354	+	chr1:6614136-6614835	S_Shore	CTGCTTCAGCCACTGGGCTCCAGTCCCACCCCTTTTGGGGGCCTGAAGTTAGGAAGCATC[CG]GCAGCTGCCTTCTATTTAAGCAACTGGCCTCCTTAGAGGCCACTCCTTGGCCATGCCAGG	CGGCAGCTGCCTTCTATTTAAGCAACTGGCCTCCTTAGAGGCCACTCCTT	TAS1R1;TAS1R1;TAS1R1;NOL9;TAS1R1	NM_138697;NM_177539;NM_177540;NM_024654;NM_177541	TSS200;TSS200;TSS200;TSS1500;TSS200				NA		1:6613929-6615822	Promoter_Associated	NOL9;TAS1R1;TAS1R1;TAS1R1;TAS1R1;TAS1R1;TAS1R1	ENST00000377705.5;ENST00000351136.3;ENST00000333172.6;ENST00000333172.6;ENST00000328191.4;ENST00000437392.2;ENST00000437392.2	TSS1500;TSS200;5'UTR;1stExon;5'UTR;1stExon;5'UTR	NOL9;NOL9;TAS1R1;TAS1R1;TAS1R1;TAS1R1;TAS1R1;TAS1R1	ENST00000464665.1;ENST00000377705.5;ENST00000351136.3;ENST00000333172.6;ENST00000333172.6;ENST00000328191.4;ENST00000437392.2;ENST00000437392.2	TSS1500;TSS1500;TSS200;5'UTR;1stExon;5'UTR;1stExon;5'UTR	NA	TRUE
cg00743325	0.425173	0.0550448	1.41362e-10	1.37614e-07	chr2	98703619	+	chr2:98703354-98703889	Island	GAGCCGCGCTGTGATTGGCCGTGTCCAGGCAACCGCGGAGACGCCGTCGTCAACAGACCG[CG]CTCGGAACCAGAGGCGCGGGTCACAGAGACCTAGAACAGCTGGAATCCTTCGCCCCCGGC	GGATTCCAGCTGTTCTAGGTCTCTGTGACCCGCGCCTCTGGTTCCGAGCG	VWA3B;VWA3B	NM_144992;NM_144992	1stExon;5'UTR				TRUE	2:98069799-98070437	2:98703405-98703709	Unclassified	VWA3B;VWA3B;VWA3B;VWA3B	ENST00000477737.1;ENST00000451075.2;ENST00000435344.1;ENST00000435344.1	TSS200;TSS200;1stExon;5'UTR	VWA3B;VWA3B;VWA3B;VWA3B;VWA3B;VWA3B;VWA3B;VWA3B;VWA3B	ENST00000433678.1;ENST00000448079.1;ENST00000448638.1;ENST00000477737.1;ENST00000484571.1;ENST00000432242.1;ENST00000432242.1;ENST00000435344.1;ENST00000435344.1	TSS200;TSS200;TSS200;TSS200;TSS200;1stExon;5'UTR;1stExon;5'UTR	NA	NA
cg00746143	0.285298	0.740278	4.7275e-10	3.26457e-07	chr3	194959645	+		OpenSea	AGGGAAGGCCTCTGTGTTCACTAAGCAGGAAGAGAAAGAACGGATCTGCGCAGGCATACA[CG]CAGAGCAGGGCTGCTGCAGCCAAACTAAGGGAGATGAAGAGCTATCCTCAGCCAGCTCAC	CGCAGAGCAGGGCTGCTGCAGCCAAACTAAGGGAGATGAAGAGCTATCCT	C3orf21	NM_152531	Body				TRUE							XXYLT1;XXYLT1	ENST00000455281.1;ENST00000494175.1	3'UTR;3'UTR	NA	TRUE
cg00746592	0.438899	0.053999	1.12952e-07	1.635e-05	chr4	57396594	-	chr4:57396748-57397269	N_Shore	AGTCCCCAGATGCGCCCAGAAGGTCCTGGAGAGTGGTGCGTCCCCTTGGCAACCGTACAA[CG]CGCAGGAAGGCGGAGTGAGATGAGGCTGAGTCCGGCCGGGGCGGGGCTGTGTGGGACTAG	CGCCCAGAAGGTCCTGGAGAGTGGTGCGTCCCCTTGGCAACCGTACAACG	THEGL	NM_001256475	TSS200			DMR	TRUE	4:57091195-57092069	4:57396186-57397531	Promoter_Associated_Cell_type_specific	THEGL	ENST00000512175.2	TSS200	THEGL	ENST00000512175.2	TSS200	NA	NA
cg00747290	0.399253	0.254092	3.56949e-06	0.000212977	chr2	42721154	-	chr2:42719784-42722166	Island	CGCCGCCGTCCAGAGGCGAGAGGCAAAGTGAGCGGGTTCGGAGGCGGCGAAGAGCCGGCT[CG]CGGCGGCGGGGGCGGGGCCTCTGTGCAGTCCTCCTCCTCGCCCGCCGGCTCCGCGCGCGC	GAGGCGAGAGGCAAAGTGAGCGGGTTCGGAGGCGGCGAAGAGCCGGCTCG	KCNG3;KCNG3;KCNG3;KCNG3	NM_172344;NM_133329;NM_133329;NM_172344	1stExon;1stExon;5'UTR;5'UTR	high-CpG:42574587-42574827			NA	2:42573251-42575665	2:42720958-42721339	Promoter_Associated	KCNG3;MTA3;KCNG3;KCNG3	ENST00000306078.1;ENST00000405592.1;ENST00000306078.1;ENST00000394973.4	1stExon;TSS1500;5'UTR;TSS200	KCNG3;MTA3;KCNG3;KCNG3	ENST00000306078.1;ENST00000405592.1;ENST00000306078.1;ENST00000394973.4	1stExon;TSS1500;5'UTR;TSS200	NA	TRUE
cg00754036	0.67918	0.785416	7.77946e-07	6.74433e-05	chr1	113569928	-		OpenSea	TGTGCGACCTTGGACATGCTGCTTGGCCTGTAAGCTTCCGTTTCTATAAAATAGGGATAA[CG]CTTCCTTCCAGGGAGGTTTTGAAAGTGGGATGAGGGATCTAAGATGCCTAGGACACATGA	GACATGCTGCTTGGCCTGTAAGCTTCCGTTTCTATAAAATAGGGATAACG							TRUE				RP11-389O22.1;RP11-31F15.2	ENST00000413231.1;ENST00000421157.1	5'UTR;3'UTR	RP11-389O22.1;RP11-31F15.2	ENST00000413231.1;ENST00000421157.1	5'UTR;3'UTR	NA	TRUE
cg00755043	0.439221	0.106373	1.02986e-05	0.000480105	chr9	91150159	-	chr9:91149945-91150648	Island	GGGTGCCGCGCTGTCGCCCAGGTATCTGGGGTCTCTGGTGTCTGAGTGTCTCATTGTCGG[CG]CGAACACAATTGCTCCAGCCACAGGCGAGGCCTGGCCAAGGTGTGGGCGCATCTGGGGCA	CGCCGACAATGAGACACTCAGACACCAGAGACCCCAGATACCTGGGCGAC	NXNL2;NXNL2;NXNL2;NXNL2	NM_001161625;NM_145283;NM_145283;NM_001161625	1stExon;1stExon;5'UTR;5'UTR				NA	9:90338645-90340865			NXNL2;NXNL2;NXNL2;NXNL2;NXNL2;NXNL2	ENST00000375854.3;ENST00000375854.3;ENST00000375855.3;ENST00000375855.3;ENST00000478686.1;ENST00000478686.1	5'UTR;1stExon;5'UTR;1stExon;1stExon;5'UTR	NXNL2;NXNL2;NXNL2;NXNL2;NXNL2;NXNL2	ENST00000375854.3;ENST00000375854.3;ENST00000487646.1;ENST00000487646.1;ENST00000478686.1;ENST00000478686.1	5'UTR;1stExon;5'UTR;1stExon;1stExon;5'UTR	TRUE	TRUE
cg00755448	0.437156	0.0878802	8.16416e-09	2.48416e-06	chr8	73448779	+	chr8:73448659-73449725	Island	GGAAAGCCGGGTCACTTGGGGCTAGGGACGGCCCCCGAGCGAGCGGGGCTGCAGGTGCCG[CG]AGGAAAGTCAGATCTTATCTGCGCTCCTAGTTATCTCCGCAGCTCTTTCTCCAGGAAAAT	AAAGAGCTGCGGAGATAACTAGGAGCGCAGATAAGATCTGACTTTCCTCG	KCNB2	NM_004770	TSS1500			DMR	NA	8:73611214-73613131			KCNB2	ENST00000523207.1	TSS1500	KCNB2	ENST00000523207.1	TSS1500	NA	TRUE
cg00755661	0.628245	0.728253	1.21137e-05	0.000544515	chr1	112946525	+		OpenSea	TGGTGCAGATCAACCTGCCAGAAGTCAGAAGTAAACTTGTTTTGGTTTGTAAATTAGACA[CG]TGAATGATAGACAATGATGACCCATTGGAAAAGGAAAACTTCATTATCCTTGCAGATGAA	GATAATGAAGTTTTCCTTTTCCAATGGGTCATCATTGTCTATCATTCACG	CTTNBP2NL	NM_018704	5'UTR				TRUE				CTTNBP2NL;CTTNBP2NL	ENST00000271277.6;ENST00000496194.1	5'UTR;5'UTR	CTTNBP2NL;CTTNBP2NL;CTTNBP2NL	ENST00000271277.6;ENST00000441739.1;ENST00000496194.1	5'UTR;5'UTR;5'UTR	NA	TRUE
cg00757933	0.777731	0.495684	2.23792e-05	0.000877872	chr6	29760864	-	chr6:29759946-29760903	Island	ACGATGGCAAGGATTACATCGTCCTGAACGAGGACCTGTGCTCCTTGACAGCCGCAGACA[CG]GCGGCTCAGATCACCCAGCTCAAGTGGGAGGCGGCCCGGGGGGCGGAGGTTCATCCTCAC	ATTACATCGTCCTGAACGAGGACCTGTGCTCCTTGACAGCCGCAGACACG	HCG4	NR_002139	TSS200				NA	6:29867896-29868847	6:29759909-29761489	Promoter_Associated	HLA-P	ENST00000457107.1	5'UTR	HLA-P;HLA-P;HLA-P;HLA-P	ENST00000446817.1;ENST00000457931.1;ENST00000476601.1;ENST00000457107.1	5'UTR;5'UTR;5'UTR;5'UTR	NA	TRUE
cg00767496	0.734679	0.238745	1.82492e-06	0.000128128	chr15	45671279	+	chr15:45669970-45671029	S_Shore	AGTCTGGAAATTGGGCCATTTGTTCCCCGGGGAGGCAGTGCTTTCCTTCCAGTACCCCGT[CG]GTTGTTATTTGGAACACCTGGCATTTCACATGGTCTTTGGCCATATGCCCCTGGCTTGAG	CGGTTGTTATTTGGAACACCTGGCATTTCACATGGTCTTTGGCCATATGC	LOC145663;GATM	NR_033252;NM_001482	Body;TSS1500				NA		15:45669693-45671628	Unclassified	GATM;GATM;GATM	ENST00000558336.1;ENST00000396659.3;ENST00000560538.1	TSS1500;TSS1500;3'UTR	GATM;GATM;GATM;GATM;GATM;GATM;GATM;GATM	ENST00000558537.1;ENST00000558118.1;ENST00000558163.1;ENST00000558362.1;ENST00000558336.1;ENST00000396659.3;ENST00000561148.1;ENST00000560538.1	TSS1500;TSS1500;TSS1500;TSS1500;TSS1500;TSS1500;5'UTR;3'UTR	NA	TRUE
cg00775425	0.297328	0.642696	3.69173e-06	0.000218696	chr1	84630160	+		OpenSea	GATTGTGTGAGTATTTGAAGAAAACAGCAATTTTTTCATATCTTTGAAAGATGTAAAAAG[CG]TAGATTAGTGCTTAAATTTAAGAAATCTGGTAATTTATAATCATGTGGCTCTAAAATAAA	CCACATGATTATAAATTACCAGATTTCTTAAATTTAAGCACTAATCTACG	PRKACB;PRKACB;PRKACB;PRKACB;PRKACB;PRKACB;PRKACB;PRKACB;PRKACB;PRKACB;PRKACB	NM_001300915;NM_001242860;NM_001242861;NM_207578;NM_001300916;NM_001300917;NM_002731;NM_182948;NM_001242857;NM_001242858;NM_001242859	TSS200;TSS200;TSS200;Body;Body;Body;Body;Body;Body;Body;Body				NA				PRKACB;PRKACB;PRKACB	ENST00000370680.1;ENST00000394839.2;ENST00000470673.1	TSS1500;TSS1500;5'UTR	PRKACB;PRKACB;PRKACB;PRKACB;PRKACB;PRKACB	ENST00000450730.1;ENST00000370680.1;ENST00000413538.1;ENST00000417530.1;ENST00000394839.2;ENST00000470673.1	TSS1500;TSS1500;TSS1500;TSS1500;TSS1500;5'UTR	NA	NA
cg00775945	0.403383	0.616714	6.19943e-06	0.00032514	chr1	104496349	-		OpenSea	TAAAGAATATTTTCACTGCGCTAAGAACTTTTTGTATTCTAACTATACATTCCTCTCTCT[CG]TTCCTGTCCCTTGATATTCACTAATCCTTTTCCTATCTCCACATTTTTCCCTTTTCAGAA	CGAGAGAGAGGAATGTATAGTTAGAATACAAAAAGTTCTTAGCGCAGTGA							NA										NA	NA
cg00789015	0.125757	0.447806	9.51324e-06	0.000451644	chr2	79268283	+		OpenSea	CAGTTTTAGGTAACTATGGGCAGATGAAACAAATTACCACTAGAGGGAGAGTTGGACCAG[CG]CTGAGTATGGTAACTGGGAAAATGAGAAGCATGAGCTGGATCCTTCCAAGAACAGAAGGG	TGGAAGGATCCAGCTCATGCTTCTCATTTTCCCAGTTACCATACTCAGCG							NA										NA	NA
cg00793280	0.849363	0.331102	1.91505e-08	4.48579e-06	chr2	10260421	-	chr2:10260279-10260931	Island	AGTCGCGCTAACCTTGGCCTGAGACCTGCAAACTTGCCCAGGCTGGGGCGTGTGAACCGG[CG]AGCGCGCAGCGGAAACGGGGCGGGGCACCTGAGGCTGGGAATGCAGAGGAGCCTTCCGGG	CGCCGGTTCACACGCCCCAGCCTGGGCAAGTTTGCAGGTCTCAGGCCAAG					chr2:10260365-10260365		NA	2:10177731-10177938	2:10260167-10261483	Promoter_Associated							NA	TRUE
cg00795007	0.645517	0.77178	1.41291e-05	0.000613788	chr1	115293968	+		OpenSea	TCCAAAGTTACAAAATGGTGTTAACGAAAATTATTTCTACAGAGATAAGAAAAAGGTGTA[CG]TGCTGAGAAATGGATATTTGAAAACATCAGAAGAATGATTATCAGGTGAGAGGTCAGAGC	CGTGCTGAGAAATGGATATTTGAAAACATCAGAAGAATGATTATCAGGTG	CSDE1;CSDE1;CSDE1;CSDE1;CSDE1;CSDE1	NM_001242893;NM_001242892;NM_007158;NM_001007553;NM_001242891;NM_001130523	5'UTR;5'UTR;5'UTR;5'UTR;5'UTR;5'UTR				NA				CSDE1;CSDE1;CSDE1;CSDE1;CSDE1;CSDE1;CSDE1	ENST00000530886.1;ENST00000358528.4;ENST00000261443.5;ENST00000534699.1;ENST00000339438.6;ENST00000369530.1;ENST00000438362.2	5'UTR;5'UTR;5'UTR;5'UTR;5'UTR;5'UTR;TSS1500	CSDE1;CSDE1;CSDE1;CSDE1;CSDE1;CSDE1;CSDE1;CSDE1;CSDE1;CSDE1;CSDE1;CSDE1;CSDE1	ENST00000525132.1;ENST00000529046.1;ENST00000530886.1;ENST00000358528.4;ENST00000261443.5;ENST00000534699.1;ENST00000339438.6;ENST00000525970.1;ENST00000525878.1;ENST00000369530.1;ENST00000533818.1;ENST00000524652.1;ENST00000438362.2	5'UTR;5'UTR;5'UTR;5'UTR;5'UTR;5'UTR;5'UTR;5'UTR;5'UTR;5'UTR;3'UTR;3'UTR;TSS1500	NA	NA
cg00802728	0.902788	0.441404	7.93483e-13	2.87668e-09	chr12	113906079	-	chr12:113900750-113906442	Island	CTTGAGCGTCTCCAGCTGCTTGGCCTTGATGGTGGTGCGGGGGCCGCGCCGCTTGGTGCC[CG]AGTTCTGCTCCTCGTTCTCGTTGTTGGCCGTCTCCTTGTCCGACGAGGTCGAGTTGTCCG	CGGGCACCAAGCGGCGCGGCCCCCGCACCACCATCAAGGCCAAGCAGCTG	LHX5	NM_022363	Body			DMR	TRUE	12:112388998-112390782									NA	TRUE
cg00803213	0.576078	0.741472	3.47553e-07	3.69854e-05	chr19	47892743	+		OpenSea	AGTTGTTGTTGAGAGTTGATGCATTAGTCCACGTGCTTAGAGCAGGGATTGGCACATAAA[CG]GTTCTCAGCAAACATCAGCTACAGTGATCACTAAGGCAACAGGAAAAGTAACCAACATTT	CGGTTCTCAGCAAACATCAGCTACAGTGATCACTAAGGCAACAGGAAAAG					chr19:47892475-47892475		NA										NA	NA
cg00807197	0.810176	0.599916	1.67425e-05	0.00069946	chr12	128822865	-		OpenSea	TACTAGTCCACTCAGGTAGAGCCGAGACTCCTGCAGGTGGAATCACTGCATACCAAAAAG[CG]TGCCTTCCGATTAGTGGAAGTTTAATCAATTGCGAGTGCTGTCACAGCTTAATCATCCAG	CGCTTTTTGGTATGCAGTGATTCCACCTGCAGGAGTCTCGGCTCTACCTG	TMEM132C	NM_001136103	Body				TRUE										NA	TRUE
cg00808511	0.225177	0.474995	1.27958e-07	1.79244e-05	chr16	52495237	-		OpenSea	TTAAAATACACGTATTCACGACAAGCAAATCAAGGTTGTTCTTTGAAGTCACAAATGCAT[CG]ACATTCAATTTTTCAGCAATTCGCTTTTGAATACTGGGGCATTATTTGCATATTTTGAAA	TATTCACGACAAGCAAATCAAGGTTGTTCTTTGAAGTCACAAATGCATCG	TOX3;TOX3	NM_001080430;NM_001146188	Body;Body				TRUE										NA	TRUE
cg00810055	0.527089	0.20338	8.71292e-07	7.34113e-05	chr17	48585575	+	chr17:48585385-48586167	Island	ACCGCTGTGAGGGGGGCAGAGGGAGGTCCCTCGACAGGATGTGGCCTTAGTCGAGGAAGG[CG]GGAAGCAGGGGCTGGCACCCCCGACGCCCCACCCGCCCCCCGTGGCCTAGCAGCAGGGCG	CGGGAAGCAGGGGCTGGCACCCCCGACGCCCCACCCGCCCCCCGTGGCCT	MYCBPAP	NM_032133	TSS200				NA	17:45940385-45941137	17:48585034-48586455	Promoter_Associated_Cell_type_specific	RP11-94C24.6;MYCBPAP;MYCBPAP;MYCBPAP	ENST00000502300.1;ENST00000419930.1;ENST00000436259.2;ENST00000323776.5	3'UTR;TSS1500;TSS1500;TSS200	RP11-94C24.6;MYCBPAP;MYCBPAP;MYCBPAP;MYCBPAP;MYCBPAP;MYCBPAP;MYCBPAP	ENST00000502300.1;ENST00000470609.1;ENST00000576179.1;ENST00000419930.1;ENST00000452039.1;ENST00000458692.1;ENST00000437498.1;ENST00000323776.5	3'UTR;TSS1500;TSS1500;TSS1500;TSS1500;TSS1500;TSS1500;TSS200	NA	NA
cg00811647	0.660328	0.786403	1.60913e-05	0.000678289	chr19	42992702	-		OpenSea	ATCTCAGATTAGAGCTTTTAAAGCACTGATCCTAGCCACGGGTTTGTACCTTCAAATACT[CG]TATGAATTGGGTACATTTCTTTCCTCTCAATTTCCCAGGATAATTGGGACTCCTGGGCCA	CGAGTATTTGAAGGTACAAACCCGTGGCTAGGATCAGTGCTTTAAAAGCT	LIPE-AS1;LIPE-AS1	NR_073180;NR_073179	Body;Body				NA				AC011497.1	ENST00000457234.1	3'UTR	AC011497.1	ENST00000457234.1	3'UTR	NA	NA
cg00813343	0.72037	0.836757	1.1987e-06	9.36178e-05	chr7	109485219	-		OpenSea	CTTTAGCCAGGACAAAAGAACCAATTTCAACATTTGGTTTCAGATACCCAGGGTTTATTA[CG]TGCTTAAAGTATGTCTGGATTCTTCTTTTTGCAGATGGAAATTCAAAGATCCAGGTCATG	CAAAAGAACCAATTTCAACATTTGGTTTCAGATACCCAGGGTTTATTACG							TRUE										NA	TRUE
cg00816224	0.323915	0.037318	5.89673e-11	7.11251e-08	chr22	17083482	-	chr22:17083384-17083628	Island	TCTTGGCCTAGCTGGATCATTGAGAAAACAAGCCCGGAGCGCGCGCAGGTAGTCCCCGGA[CG]GACTCCGAGCGAACCGCCGAGCCGTGGGCGCTCGGGAAACTCGGAGCTGTCAAAACGCCC	TGGATCATTGAGAAAACAAGCCCGGAGCGCGCGCAGGTAGTCCCCGGACG	psiTPTE22	NR_001591	Body				NA	22:15461937-15463628			TPTEP1;TPTEP1;TPTEP1	ENST00000400593.2;ENST00000426585.1;ENST00000558085.1	5'UTR;5'UTR;5'UTR	TPTEP1;TPTEP1;TPTEP1	ENST00000400593.2;ENST00000426585.1;ENST00000558085.1	5'UTR;5'UTR;5'UTR	NA	TRUE
cg00818034	0.520315	0.716134	1.5123e-05	0.000647349	chr1	113896884	-		OpenSea	GTATACAAGCTAAAAATTAATCTTCATATAGTTGTACTCTGGGGTCACTCAACATTTAAA[CG]CACATTGCCAAGAATACTGTTTGTCTGCAGAATCATAAATGCACAAATGAATTACTCTTA	AAAATTAATCTTCATATAGTTGTACTCTGGGGTCACTCAACATTTAAACG							NA										NA	NA
cg00824141	0.283302	0.0344312	2.24736e-06	0.000150044	chr2	106015518	+	chr2:106014878-106015884	Island	GGGCTGGAGGGCGCGGGCGGCTGGTGGCTGCGGCTCCGCTGCCGGCCGAGTGGAGCGCTG[CG]CAGCTCCCGCCCTCGAGAAACCCCGCCGTGTCATTTGACCATATAAGGAGATGCACGCCT	CCTTATATGGTCAAATGACACGGCGGGGTTTCTCGAGGGCGGGAGCTGCG	FHL2;FHL2;FHL2;FHL2;FHL2;FHL2;FHL2	NM_001039492;NM_201557;NM_001039492;NM_001450;NM_001450;NM_201555;NM_201555	1stExon;5'UTR;5'UTR;1stExon;5'UTR;5'UTR;1stExon	high-CpG:105381855-105381991			NA	2:105381311-105382817	2:106014507-106016259	Unclassified_Cell_type_specific	FHL2;FHL2;FHL2;FHL2;FHL2;FHL2;FHL2;FHL2	ENST00000344213.4;ENST00000408995.1;ENST00000393353.3;ENST00000322142.8;ENST00000358129.4;ENST00000409177.1;ENST00000336660.5;ENST00000393352.3	1stExon;TSS200;TSS200;TSS200;5'UTR;5'UTR;5'UTR;5'UTR	FHL2;FHL2;FHL2;FHL2;FHL2;FHL2;FHL2;FHL2	ENST00000344213.4;ENST00000408995.1;ENST00000393353.3;ENST00000322142.8;ENST00000358129.4;ENST00000409177.1;ENST00000336660.5;ENST00000393352.3	1stExon;TSS200;TSS200;TSS200;5'UTR;5'UTR;5'UTR;5'UTR	NA	TRUE
cg00825690	0.609192	0.743052	1.0667e-05	0.000493674	chr1	64960202	-		OpenSea	ATATAGGATAGCAATTCTCGAGCTCCCCAACAACATCCCAAAGCTTTGGGATGGTTCTAA[CG]ACAAAGAATTTACATTTCTCTTTCTTTAGTCTGATTTGGAAGCTCCAATCTAGAATTTAA	AATTCTCGAGCTCCCCAACAACATCCCAAAGCTTTGGGATGGTTCTAACG	CACHD1	NM_020925	Body				TRUE										NA	TRUE
cg00827210	0.798908	0.307503	9.8644e-09	2.81618e-06	chr8	1427491	+	chr8:1430752-1431324	N_Shelf	CCAGGCGGGGATTGGGGGCGGTGGGGACAGAATAAGATGCTGGGCGCAGGGATGATTAGC[CG]CCTCTCAAGCTTTCATCCCTCAGGCACTCTGGGGACGAAAGTGACCTCTGTTTGTTTTTG	CGCCTCTCAAGCTTTCATCCCTCAGGCACTCTGGGGACGAAAGTGACCTC							TRUE										NA	TRUE
cg00828689	0.450863	0.21833	2.99398e-07	3.31603e-05	chr3	196697064	+	chr3:196695319-196697065	Island	CCGAGGGTCGGCAGCCGGATCGCCCTCCGTGCCCCATAGCACCCCTCACACTAAAAACGA[CG]ACTTTATTAAGATGTGAGGTATTCTATACATACGATAAATACCAGGAAATTTAAGTACAG	TTCCTGGTATTTATCGTATGTATAGAATACCTCACATCTTAATAAAGTCG	PIGZ	NM_025163	TSS1500				NA		3:196695355-196697221	Unclassified	PIGZ;PIGZ	ENST00000412723.1;ENST00000443835.1	TSS1500;TSS1500	PIGZ;PIGZ;PIGZ	ENST00000412723.1;ENST00000443835.1;ENST00000238138.2	TSS1500;TSS1500;TSS1500	NA	TRUE
cg00829404	0.741264	0.336482	5.05707e-07	4.87205e-05	chr1	61362869	-		OpenSea	GCCACTTTCCATACCCGCTTGGGGCAGGGCCAACTTCCCATTAGCACTGCTGTTACAGAT[CG]GGCCTGCTTTGCAGCCGGCCAGTGCCAACTGTGGTCATGGCCTGTTAGGAAACCTACGAG	ACCCGCTTGGGGCAGGGCCAACTTCCCATTAGCACTGCTGTTACAGATCG							TRUE										NA	TRUE
cg00834587	0.532417	0.702532	1.48538e-06	0.000109862	chr1	99126226	+	chr1:99126872-99127711	N_Shore	CACAGAAACAAATGTGGATACTCATGGGGCAGTGACCAACCTGACTGAAGGGTGGGTGCA[CG]TCTGAAATCAATGGGAATACATTTGAATGATTAGGAGATAATATATTATTAAGGCCTTGC	TAATATATTATCTCCTAATCATTCAAATGTATTCCCATTGATTTCAGACG	SNX7;SNX7;SNX7	NM_152238;NM_015976;NR_033716	TSS1500;TSS1500;TSS1500				NA				SNX7;SNX7;SNX7;SNX7	ENST00000370189.5;ENST00000529992.1;ENST00000306121.3;ENST00000473868.1	TSS1500;TSS1500;TSS1500;TSS1500	SNX7;SNX7;SNX7;SNX7;SNX7	ENST00000370189.5;ENST00000529992.1;ENST00000306121.3;ENST00000473868.1;ENST00000528824.1	TSS1500;TSS1500;TSS1500;TSS1500;TSS1500	NA	NA
cg00841352	0.700732	0.817868	1.93107e-06	0.000133683	chr1	79938150	+		OpenSea	TATTTACCTAAACAAGATTTTCTGACACTTCTGAAAAACTAGAAGTGAAGCTCACGTTGA[CG]AAAAGAAGAACTGAGAGTATGTGGCTGTTAGAAAATCTGTAGCAAGGTTATCAAAGTTCA	ACCTTGCTACAGATTTTCTAACAGCCACATACTCTCAGTTCTTCTTTTCG							NA										NA	NA
cg00842208	0.576714	0.846032	6.41153e-06	0.00033404	chr18	34903062	-		OpenSea	CCAGCCAGTCACAAGCTTCCTCCTACCTTCTGCTCTAGGACTCGAAGTGAGTTTTGGCTG[CG]TCAGGACAACTGGGTGGGGGAGTATGGGTGCCTGTGACTCAGCAAGGTGAGCACAAGGCC	CGCAGCCAAAACTCACTTCGAGTCCTAGAGCAGAAGGTAGGAGGAAGCTT	CELF4;CELF4;CELF4;CELF4	NM_001025088;NM_001025089;NM_020180;NM_001025087	Body;Body;Body;Body				NA										NA	NA
cg00842328	0.685707	0.862479	9.87544e-06	0.000464793	chr22	30474664	+	chr22:30476012-30476530	N_Shore	AAAAAAAAAAAAAAAAAAAAAAATTAGATTGAGAGAAATTCTATGAAAGAAACAGAATAA[CG]AATAACTGTGTTTGCTGGTGGGGTAGACTGCCAATAGTATAGGGCAGAGAGGGGTAAGTC	CGAATAACTGTGTTTGCTGGTGGGGTAGACTGCCAATAGTATAGGGCAGA	HORMAD2-AS1	NR_110541	Body				NA				HORMAD2;CTA-85E5.10	ENST00000336726.6;ENST00000429350.1	TSS1500;3'UTR	HORMAD2;CTA-85E5.10;CTA-85E5.10;CTA-85E5.10;MTMR3	ENST00000336726.6;ENST00000453743.2;ENST00000432568.1;ENST00000429350.1;ENST00000464734.1	TSS1500;3'UTR;3'UTR;3'UTR;5'UTR	NA	NA
cg00843021	0.660691	0.791885	3.7331e-07	3.89338e-05	chr1	75100781	+		OpenSea	ATATCATTGAGTTGCCCATTTTCGTTTATTATCTAGAGAAAAATGAGCTTGTTTTGAGTT[CG]TTTAGTTAGCCTGGACAGTCTCACAAGATGTGACTATTCCTGGACCCTGGCTAAAACAGG	AGGGTCCAGGAATAGTCACATCTTGTGAGACTGTCCAGGCTAACTAAACG	ERICH3	NM_001002912	Body				NA				C1orf173;RP11-17E13.3	ENST00000420661.2;ENST00000449696.1	TSS1500;3'UTR	C1orf173;C1orf173;RP11-17E13.3	ENST00000479666.1;ENST00000420661.2;ENST00000449696.1	TSS1500;TSS1500;3'UTR	NA	NA
cg00844297	0.0495803	0.31164	3.10695e-06	0.000191245	chr12	132990805	+	chr12:132990777-132990987	Island	CTAGTGGGTACCTGGGGTCCTGCAGCTCAGAACCGCGACCCCAGCCCACGGGAGTCTCTG[CG]TCCACGCACCTGGACGTCCTCCTGCGGCAGGCGCCCCGGAGGCCCCTCCAGTGTTCCCAC	GAGGGGCCTCCGGGGCGCCTGCCGCAGGAGGACGTCCAGGTGCGTGGACG							NA	12:131500851-131501576									NA	TRUE
cg00844890	0.568138	0.734694	6.94766e-06	0.000355414	chr1	78695105	-		OpenSea	AAAGAGATTACAAGTAAGTGTTCTCTCTCTATGCAATCTTTACAAAATCAAGCACATTTC[CG]ATCCAAGGCAGAGAACGAGTATTTCCTTTACTTTCCTTGAGATGAAATACAAACTTTAAA	CGGAAATGTGCTTGATTTTGTAAAGATTGCATAGAGAGAGAACACTTACT	MGC27382	NR_027310	TSS200				NA				RP11-183M13.1	ENST00000436742.1	TSS200	RP11-183M13.1;RP11-183M13.1	ENST00000436742.1;ENST00000413519.1	TSS200;TSS200	NA	NA
cg00845020	0.179923	0.459248	1.40462e-09	7.08493e-07	chr11	112090920	-		OpenSea	AGAAGACCCCCAGACATACAATATGTGGCACCTGTGAACTCATGGTTAGGCTCTCTGCAC[CG]TCCTGGACTAACATAGTTTCCTGTCTAATTTTCCTTAAGAGTCACTTCAAACTTCACAGA	CGGTGCAGAGAGCCTAACCATGAGTTCACAGGTGCCACATATTGTATGTC							NA		11:112090239-112091889	Unclassified	BCO2	ENST00000531169.1	3'UTR	BCO2	ENST00000531169.1	3'UTR	NA	NA
cg00847722	0.374944	0.526748	1.39873e-05	0.000608912	chr1	25104799	-		OpenSea	CTATGACAAATTATTGAGCTTCTCTGAACCTCAGTTTCCTCATCTGAAACTCATATGAAA[CG]AGGAAAACAACCCCTAATTTCATATGGTTATTGTGAAATACATAAAACTAGTTTTATATA	ATTGAGCTTCTCTGAACCTCAGTTTCCTCATCTGAAACTCATATGAAACG	CLIC4	NM_013943	Body				NA				U6;CLIC4	ENST00000459588.1;ENST00000497755.1	TSS1500;5'UTR	U6;CLIC4;CLIC4	ENST00000459588.1;ENST00000489758.1;ENST00000497755.1	TSS1500;5'UTR;5'UTR	NA	NA
cg00849335	0.671674	0.784579	5.16904e-06	0.000282656	chr1	66736380	+		OpenSea	CAGAACCTTTGCTTGGTTTCTACATTAAGCAAGAACTGTCAGGCAGGATTACAACACTTA[CG]GACAAATAGGAATAAAATCAATCTTGTGACCAAAGGCTCTGACCAGTCATGATAAAGGAA	CGGACAAATAGGAATAAAATCAATCTTGTGACCAAAGGCTCTGACCAGTC	PDE4B;PDE4B;PDE4B;PDE4B;PDE4B	NM_001037341;NM_002600;NM_001297440;NM_001297441;NM_001037340	Body;Body;Body;Body;Body		chr1:66736293-66736293		NA										NA	NA
cg00850083	0.206925	0.104777	2.71921e-06	0.000172985	chr21	40985387	-		OpenSea	AATTAAAAAGAATGGCCTAATCTTAAGCAACAACAACAAAACAAACTCTGAAGCACCCTG[CG]GCAGGCAGCTTCTGCATCGTGGGGGTTGTGGAAGGGGCTGATGGGCAGGATCATGAGAAA	TGGCCTAATCTTAAGCAACAACAACAAAACAAACTCTGAAGCACCCTGCG	C21orf88;C21orf88	NR_026543;NR_026542	TSS1500;TSS1500				NA				C21orf88;C21orf88;B3GALT5	ENST00000380612.4;ENST00000329618.6;ENST00000380620.3	TSS1500;TSS1500;5'UTR	C21orf88;C21orf88;B3GALT5;TMPRSS3	ENST00000380612.4;ENST00000329618.6;ENST00000380620.3;ENST00000553129.1	TSS1500;TSS1500;5'UTR;3'UTR	NA	TRUE
cg00850538	0.853576	0.640942	1.01176e-07	1.51614e-05	chr2	36582038	+	chr2:36582397-36584260	N_Shore	TGGCAATGTCATATGGCATTAATGATGCATGAGATCTATGGGTGTAGTGTCACGTCTAGG[CG]TGTAGTAATCCAGTCTTCGGCCTTACTCCAGGGAGAAAGATTCAGCTTTGTTACTTTCCA	AAGCTGAATCTTTCTCCCTGGAGTAAGGCCGAAGACTGGATTACTACACG	CRIM1	NM_016441	TSS1500				NA				CRIM1;RP11-490M8.1	ENST00000280527.2;ENST00000565283.1	TSS1500;1stExon	CRIM1;RP11-490M8.1	ENST00000280527.2;ENST00000565283.1	TSS1500;1stExon	TRUE	TRUE
cg00858738	0.690102	0.822452	6.59117e-06	0.000340975	chr1	70210714	-		OpenSea	TCCACCTGCTCAAAAACCATGGCCAGTAGTAAACTTCCAAAAATATCTGGATTGTTTATA[CG]CTGTGCTGGAACTCTACCTGAGAATTAACCTAATTATCAAAATGAGACAGTTCCTATAAC	AAAACCATGGCCAGTAGTAAACTTCCAAAAATATCTGGATTGTTTATACG							TRUE										NA	TRUE
cg00863667	0.842748	0.592164	7.55425e-06	0.000379149	chr17	16903299	+		OpenSea	AACACAGCCCAGAGCTGCCAAAAGATGTCCCCCACCCCCGCCTCCTTGATCTCACCTGGG[CG]TGTTACTAGTGGATCCTAACCCTGGAAGCCATTGCAAGGGAACCTGGAAATGTAGCCTTC	TCCAGGTTCCCTTGCAATGGCTTCCAGGGTTAGGATCCACTAGTAACACG							NA										NA	NA
cg00864183	0.213701	0.0524453	1.46694e-05	0.000632088	chr17	48045973	-	chr17:48045788-48047207	Island	GCAACCAAACCAGGGCCCCTGCCGGAAGCGGAAGCCAGCACGCAGGGCGGTGGGGTGCAG[CG]GCGGCGGTCTCGGCGTGCCAGGCCCAGGGCGCCCCGCGGGGGCGTGCGCGCCACACGCGT	GGGCCCCTGCCGGAAGCGGAAGCCAGCACGCAGGGCGGTGGGGTGCAGCG	DLX4	NM_138281	TSS1500	high-CpG:45400908-45400975			NA	17:45400788-45402206			DLX4;DLX4	ENST00000240306.3;ENST00000505318.1	TSS1500;TSS1500	DLX4;DLX4;DLX4	ENST00000503410.1;ENST00000240306.3;ENST00000505318.1	TSS1500;TSS1500;TSS1500	NA	TRUE
cg00865054	0.647598	0.766422	5.43166e-09	1.8805e-06	chr1	52108201	-		OpenSea	TGCTTTTGCCCTAGTCCTTACCCCTAGGATGATGCTATAAAAGCCAGGTCAATTGTCCTG[CG]TGAGTAGCCAGACACTCTGTAGGTGGGGGACAAGGAAAAATTATTTTTCTCTCCTATGAA	CGCAGGACAATTGACCTGGCTTTTATAGCATCATCCTAGGGGTAAGGACT	OSBPL9;OSBPL9;OSBPL9;OSBPL9	NM_148908;NM_148906;NM_024586;NM_148909	Body;5'UTR;Body;Body				TRUE				OSBPL9	ENST00000435686.2	5'UTR	OSBPL9	ENST00000435686.2	5'UTR	NA	TRUE
cg00865190	0.687716	0.790897	2.50618e-07	2.90695e-05	chr1	113996474	+		OpenSea	CTTGGTGAAGTGAGTTGTCAAGGAGCTAAATATACACATTAGTATGAGAAGAGAGCAACA[CG]CAATCTGATTTCAGAGCTGGTGCACTTAACCATCATGCTATCTACTGCTTCCCCTTGTGG	CGCAATCTGATTTCAGAGCTGGTGCACTTAACCATCATGCTATCTACTGC	MAGI3;MAGI3	NM_152900;NM_001142782	Body;Body				NA				MAGI3	ENST00000486456.1	5'UTR	MAGI3	ENST00000486456.1	5'UTR	NA	NA
cg00869927	0.558054	0.675207	2.9894e-07	3.31268e-05	chr1	67051101	-		OpenSea	TCTATTAGGCCTTCCCTCATGGAGTCTGAGACTTTACTTTTGTGCTGTGACATGTCAGAA[CG]TTTCCTTCTGCATGGAATAGGTCTAGGATATCAAGTTATGCTAACTTTGGATCTGCAGAT	CGTTCTGACATGTCACAGCACAAAAGTAAAGTCTCAGACTCCATGAGGGA	SGIP1;SGIP1	NM_001308203;NM_032291	Body;Body				NA				SGIP1	ENST00000468286.1	5'UTR	SGIP1;SGIP1;SGIP1	ENST00000493564.1;ENST00000497055.1;ENST00000468286.1	5'UTR;5'UTR;5'UTR	NA	NA
cg00871578	0.848691	0.71908	1.68118e-05	0.000701437	chr10	135523745	+		OpenSea	GCCTGCGCCGCGCCTCACTCCCGCCCGCCCAGCGACCCCTCCCCTCCGGGGAGGCGCCGG[CG]TGCGTCTACGCCCTGCTCCGCGTCTCCCCAACAGCGGCGCGCCTCTCTGCGCCTGCGCCG	AGAGAGGCGCGCCGCTGTTGGGGAGACGCGGAGCAGGGCGTAGACGCACG							NA	10:135373153-135374434									NA	TRUE
cg00871979	0.66861	0.225368	1.56287e-10	1.47308e-07	chr18	11982063	-	chr18:11980483-11982142	Island	GCTAACGTGACCTTTGCGTTTGAGTGAGTGGTCAGAATGTAGAAATCTCTCCAGGGGTAG[CG]TACGGGGCTGTTGATTTTTAAGGACCTATGAACGGATTCAGCTCGCGGTAGGAAGCCCGG	CGCTACCCCTGGAGAGATTTCTACATTCTGACCACTCACTCAAACGCAAA	IMPA2	NM_014214	Body				NA	18:11970325-11972325									NA	TRUE
cg00872683	0.828247	0.601716	2.77028e-06	0.000175538	chr4	40398005	-		OpenSea	TCCTGTGGGGGTAGGGCCTGTCCAAGTCCCGTCATGCTTCAGTACCTAAGCAGGTGCATT[CG]CTCCCTTCCTGTGCCTGGAGTCCTGCCATCCATTGCTCAACTCCAATCTCTTGTTGTTTT	AGGGCCTGTCCAAGTCCCGTCATGCTTCAGTACCTAAGCAGGTGCATTCG							TRUE										NA	TRUE
cg00872726	0.640748	0.457756	3.59007e-06	0.000213925	chr14	97499908	+	chr14:97499605-97500176	Island	GGGCGCGGCGCAGCAGCTGGTGCCGCGGTGGGCATCTGTTCGGCCTCCTCTGTCCCCACG[CG]TGACCTGATCGCTGCGACAGCGGAATCCCACGGTGCAGGCCCAGAGCTGCGCCGAGAGCC	AGCTCTGGGCCTGCACCGTGGGATTCCGCTGTCGCAGCGATCAGGTCACG							NA	14:96569091-96569929	14:97499448-97500055	Unclassified_Cell_type_specific							NA	TRUE
cg00873878	0.433078	0.719059	3.01634e-08	6.27202e-06	chr14	29998825	-		OpenSea	GAAGGAAACCCTTTATTTTCTGAAGGCTAAGGCCTACCACGCCAATAGCAGAAGTGGAGC[CG]CCAAGAGGTCATGATTGGTAGTGAAGGGAAGAGAGGAATTGTATTTAATCCCTATTTCAC	CGGCTCCACTTCTGCTATTGGCGTGGTAGGCCTTAGCCTTCAGAAAATAA	MIR548AI	NR_039672	Body				NA										NA	NA
cg00873881	0.564708	0.674565	9.86233e-06	0.000464347	chr1	34966658	+		OpenSea	AGCATTTTACACTTTTTATCTTGATTAAAGTTTATAAAAGCCCTGATAATCCCTCTTTTA[CG]TATATCATAGCAGAGGCTCAGAGAGATTAAGTGACTCATTTAGAGCAGATTACCTTTAAA	CTGCTCTAAATGAGTCACTTAATCTCTCTGAGCCTCTGCTATGATATACG							NA										NA	NA
cg00875400	0.28343	0.547506	4.85965e-06	0.00026957	chr13	78815720	-		OpenSea	TGGCTGGAGCAATTCCCTCCGGGTGGGTTCCCCTGTTGGATGTACTAAATTAGGGTGATG[CG]TTAGGGCAAAAAACAAACAAACAAACAAAAACCTTGAGATTGTAATTGTTCAAGAATGAT	CGCATCACCCTAATTTAGTACATCCAACAGGGGAACCCACCCGGAGGGAA	RNF219-AS1	NR_047001	Body				NA		13:78815136-78816221	Unclassified_Cell_type_specific	RP11-203P2.1	ENST00000430549.1	5'UTR	RP11-203P2.1	ENST00000430549.1	5'UTR	NA	NA
cg00884093	0.402755	0.038813	1.98984e-10	1.74403e-07	chr22	46932648	-	chr22:46929317-46934861	Island	CGGCGGGCAGCGGCAGGCGGGTAAGGTGGTCGGAGCTGCGAGCGCCGAATGCTGCGCGGC[CG]CGCAGCCGCCGGGGACGGGGAAGCAGAGCGCCCCGCAGAGCCGGGCACCGGTTCCGCAGA	CGGCCGCGCAGCATTCGGCGCTCGCAGCTCCGACCACCTTACCCGCCTGC	CELSR1	NM_014246	1stExon			DMR	NA	22:45307982-45313549			CELSR1	ENST00000262738.3	1stExon	CELSR1;CELSR1	ENST00000262738.3;ENST00000454637.1	1stExon;TSS1500	NA	TRUE
cg00884574	0.49446	0.719819	2.21935e-08	5.00604e-06	chr15	35811683	-		OpenSea	ATTTCATGAACAGACAGTACAGCCTGTAAGATTCCATCTTTCTCAAATTACTCTGATGAA[CG]TCTGATAAAACTTGAGATTTACCAAGGGATAAAAAGAAGAAGCAGCCAATAATTCTAAAT	GACAGTACAGCCTGTAAGATTCCATCTTTCTCAAATTACTCTGATGAACG	DPH6	NM_080650	Body				NA		15:35811680-35812124	Unclassified_Cell_type_specific				ATPBD4;ATPBD4	ENST00000559784.1;ENST00000559585.1	3'UTR;3'UTR	NA	NA
cg00884800	0.194013	0.450084	2.64614e-06	0.000169527	chr16	6215524	+		OpenSea	TTGCAGAAGTCTCACTCAAAAGAGTTCAAAATGAGAGTTCCAAACCTAATAAAGATAACA[CG]TTTGCCCTCTGGTGGACATTCATTTTGAGTTAGAATTTTCTCTGCTAAGACTAGAGATTT	TTAGCAGAGAAAATTCTAACTCAAAATGAATGTCCACCAGAGGGCAAACG	A2BP1;A2BP1	NM_001142333;NM_018723	5'UTR;5'UTR				TRUE				RP11-420N3.2;RBFOX1	ENST00000569895.1;ENST00000550418.1	5'UTR;5'UTR	RP11-420N3.2;RBFOX1;RBFOX1;RBFOX1	ENST00000569895.1;ENST00000547605.1;ENST00000550418.1;ENST00000548749.1	5'UTR;5'UTR;5'UTR;5'UTR	NA	TRUE
cg00884805	0.581821	0.743606	2.52493e-07	2.92062e-05	chr1	68296607	-	chr1:68298371-68299315	N_Shore	TCCAGTAGCCTGCTGCTTGAACAAGCTAGATAAATATCTAATAATTTTGACCATGTACTG[CG]TGTTAAGTCCAGTTTAAGTGTTTTCCAAAGACAAAGTTTTCATATACTTTCTGTAAAGCC	CGCAGTACATGGTCAAAATTATTAGATATTTATCTAGCTTGTTCAAGCAG	GNG12	NM_018841	5'UTR				NA				RP11-518D3.1;GNG12;GNG12	ENST00000420587.1;ENST00000370982.3;ENST00000494936.1	TSS1500;5'UTR;3'UTR	RP11-518D3.1;RP11-518D3.1;GNG12;GNG12	ENST00000541803.1;ENST00000413628.1;ENST00000370982.3;ENST00000494936.1	TSS1500;TSS1500;5'UTR;3'UTR	NA	TRUE
cg00887994	0.242505	0.453039	1.60449e-07	2.1061e-05	chr14	105837481	-	chr14:105836031-105836386	S_Shore	GCTTTGTGGCCCGGTGGGGCAGGCAGCATTTCTGGGAACAGCGTAACATCACCAACTGGC[CG]CAGAGGAAGGGCAGCTCCGCCACTGGGATGGTCATCGGGCCCCTGTGTCTTTTGGTTTGC	CGGCCAGTTGGTGATGTTACGCTGTTCCCAGAAATGCTGCCTGCCCCACC	PACS2;PACS2;PACS2	NM_001100913;NM_015197;NM_001243127	Body;Body;Body				NA		14:105837062-105837944	Unclassified				PACS2	ENST00000551692.1	5'UTR	NA	NA
cg00889791	0.607803	0.791109	3.19205e-06	0.000195184	chr6	126190445	-		OpenSea	GACATTATGTATTGACTTGTTCTTGCTGGTTTTTCTCAGAACCAGCATATCTAGCCAGTT[CG]TTTCTTGACACCCTCCCCAGTCTTCCCCCCCACCAGCATACTCAATGTCCACATCTCACA	CGAACTGGCTAGATATGCTGGTTCTGAGAAAAACCAGCAAGAACAAGTCA	NCOA7;NCOA7;NCOA7;NCOA7;NCOA7	NM_001199621;NM_001199620;NM_181782;NM_001122842;NM_001199619	5'UTR;Body;Body;Body;Body				NA				NCOA7;NCOA7;RP11-73O6.4	ENST00000229634.9;ENST00000431092.2;ENST00000563385.1	5'UTR;3'UTR;5'UTR	NCOA7;NCOA7;RP11-73O6.4	ENST00000229634.9;ENST00000431092.2;ENST00000563385.1	5'UTR;3'UTR;5'UTR	NA	NA
cg00889945	0.181101	0.291983	3.0473e-06	0.000188336	chr22	25202552	+	chr22:25201953-25202553	Island	CAGCAGCGGCCAAACGGGAAAAGAGTCTTCGTGGAAGGGTGGCCTCTGGCGGCGGGGGGG[CG]GCCAGAACAGGTGTGGGGCTCACCTGGGTGGGCATTGACCTCCCGCAGGGCAGGAGGCGC	CTGCGGGAGGTCAATGCCCACCCAGGTGAGCCCCACACCTGTTCTGGCCG	SGSM1;SGSM1;SGSM1;SGSM1	NM_133454;NM_001098497;NM_001098498;NM_001039948	Body;Body;Body;Body				NA	22:23531971-23532553	22:25201730-25203019	Unclassified	SGSM1;SGSM1	ENST00000470591.1;ENST00000403206.4	5'UTR;5'UTR	SGSM1;SGSM1	ENST00000470591.1;ENST00000403206.4	5'UTR;5'UTR	NA	TRUE
cg00894361	0.268062	0.59244	4.13922e-09	1.55363e-06	chr2	166214447	-		OpenSea	CATCTATAAATATAATCAGTTTCTAAATGACTTTTGACTGGCCTGCATGTTACTCAGCTA[CG]TTCCTTGCCCTTCCATTGGCAGTAAAATAAAAACATGCACAGCTGCTATTATGCTGAGTC	CGTAGCTGAGTAACATGCAGGCCAGTCAAAAGTCATTTAGAAACTGATTA	SCN2A;SCN2A;SCN2A	NM_021007;NM_001040142;NM_001040143	Body;Body;Body				TRUE							SCN2A	ENST00000480032.1	5'UTR	NA	NA
cg00894715	0.598555	0.847151	1.61668e-08	3.97515e-06	chr11	34489880	+		OpenSea	CTTTTCTCTGAGCAGGTGCGGGCATTCTATGTGAACGTGCTGAATGAGGAACAGAGGAAA[CG]TCTGTGTGAGAACATTGCCGGCCACCTGAAGGATGCACAAATTTTCATCCAGAAGAAAGC	CGTCTGTGTGAGAACATTGCCGGCCACCTGAAGGATGCACAAATTTTCAT	CAT	NM_001752	Body				NA		11:34489819-34490159	NonGene_Associated_Cell_type_specific				CAT	ENST00000525707.1	5'UTR	NA	NA
cg00898350	0.260057	0.462566	9.3533e-06	0.000445973	chr17	18164434	-	chr17:18163685-18164672	Island	TTTCAGCCACCCGTGCCCTTTCCTGCTTCTCGGAGCTGGAAGGCTGTGGACTGAGGCCTG[CG]CGACCCCGCCAGAGATGGGGCTGAGTCCCAATTTAGACAGGTTGGGAGTATTTAAAGCGC	GTGCCCTTTCCTGCTTCTCGGAGCTGGAAGGCTGTGGACTGAGGCCTGCG	SMCR7;SMCR7;SMCR7;SMCR7	NM_148886;NM_001144900;NM_148886;NM_139162	5'UTR;5'UTR;1stExon;5'UTR				NA	17:18104393-18105360	17:18163665-18164861	Promoter_Associated	SMCR7;SMCR7;SMCR7;SMCR7;SMCR7	ENST00000323019.3;ENST00000395704.3;ENST00000395703.3;ENST00000395706.2;ENST00000395706.2	5'UTR;5'UTR;5'UTR;5'UTR;1stExon	SMCR7;SMCR7;SMCR7;SMCR7;SMCR7	ENST00000323019.3;ENST00000395704.3;ENST00000395703.3;ENST00000395706.2;ENST00000395706.2	5'UTR;5'UTR;5'UTR;5'UTR;1stExon	NA	TRUE
cg00907891	0.29904	0.621379	8.77443e-07	7.3787e-05	chr4	90212154	-		OpenSea	ACAGAACTGTCAGCTGACATCCAGGGTCCCATGATACTTGCCTCCATCCATTTAAAGAGA[CG]TTTGAGACAGAAACCAACCCAAGATTTCTGGATATCAGAGTGCAAATCTGTTCAGAGAGC	CGTCTCTTTAAATGGATGGAGGCAAGTATCATGGGACCCTGGATGTCAGC	GPRIN3	NM_198281	5'UTR		chr4:90211830-90211830		NA				GPRIN3	ENST00000333209.3	5'UTR	GPRIN3	ENST00000333209.3	5'UTR	NA	NA
cg00908027	0.215521	0.383575	2.32504e-07	2.75187e-05	chr16	84764188	-		OpenSea	AGAAAAAAAACTCAGTGAACCGTTTCTGAGCGTTCCAGCTCATGACTTGAGGGTGTTTGC[CG]CTGACTCATGCTGAAGCCACTTGGTGTCTGCGTTTGAAACAGGAAGTGTGTGTTAGTGGC	CGGCAAACACCCTCAAGTCATGAGCTGGAACGCTCAGAAACGGTTCACTG	USP10	NM_005153	Body				TRUE		16:84764104-84764332	Unclassified_Cell_type_specific	USP10;USP10	ENST00000562743.1;ENST00000397953.4	5'UTR;5'UTR	USP10;USP10;USP10;USP10;USP10;USP10	ENST00000562743.1;ENST00000569511.1;ENST00000562092.1;ENST00000562283.1;ENST00000397953.4;ENST00000569038.1	5'UTR;5'UTR;5'UTR;5'UTR;5'UTR;5'UTR	NA	TRUE
cg00910796	0.539157	0.734917	1.41044e-08	3.60849e-06	chr1	51571606	-		OpenSea	TGATTTAGACAGAAAGTGACACTCATTGAAGGTATTAGCAAATATGTAATTTTTCCTTCC[CG]TGGTAAAATGTTTTGGAAACTTTCATGTTCTTTATATCTCATTGCAATTCCCCTGAGAGG	CGGGAAGGAAAAATTACATATTTGCTAATACCTTCAATGAGTGTCACTTT	C1orf185	NM_001136508	Body				NA				Y_RNA;C1orf185	ENST00000363392.1;ENST00000467127.1	TSS1500;5'UTR	Y_RNA;C1orf185;C1orf185	ENST00000363392.1;ENST00000467127.1;ENST00000474016.1	TSS1500;5'UTR;5'UTR	NA	NA
cg00911502	0.296778	0.480311	1.44074e-05	0.000623255	chr12	62400161	+		OpenSea	TCTGCTGGTAAGAAGAGGAAAATGGTCATACTTCAAACCAAAGCGCTCCTATAAATTTCA[CG]TGGATAGCAGATGTATCTAAAGATCCGAAATAGAGTAGCCTACAAATGATTGATTTAGAA	CGTGGATAGCAGATGTATCTAAAGATCCGAAATAGAGTAGCCTACAAATG	FAM19A2	NM_178539	5'UTR				NA		12:62399857-62400296	Unclassified	FAM19A2;FAM19A2;FAM19A2	ENST00000551449.1;ENST00000416284.3;ENST00000551619.1	5'UTR;5'UTR;5'UTR	FAM19A2;FAM19A2;FAM19A2;FAM19A2;FAM19A2	ENST00000551449.1;ENST00000416284.3;ENST00000551619.1;ENST00000549379.1;ENST00000548780.1	5'UTR;5'UTR;5'UTR;5'UTR;5'UTR	NA	NA
cg00915612	0.390171	0.631671	6.6619e-08	1.10893e-05	chr15	77267197	+		OpenSea	CATTGTCCCTGGCTGGCCCTGGCCCAGCCTCTCCAGCATCCTCATTTGCCTCCCTGCCTC[CG]GCTCACCCTGCCCACATATCCACCAGGGGCTGCCGTTGTTTCTCTGATTAGTTACTGTGT	CGGCTCACCCTGCCCACATATCCACCAGGGGCTGCCGTTGTTTCTCTGAT							NA										NA	NA
cg00916810	0.308376	0.531958	1.60498e-06	0.000116532	chr4	88449925	-		OpenSea	GTACTTCTACAAAACACATTTCAGGATTCAGGCTTCACTAAGATCTGAATGCTACTGAGG[CG]ATCAACAGTTCCACATTTCTATTCTTGGTCTTCACTAAAATCACCATCATTTATTAGTAC	CGCCTCAGTAGCATTCAGATCTTAGTGAAGCCTGAATCCTGAAATGTGTT	SPARCL1;SPARCL1;SPARCL1;SPARCL1	NM_001291976;NM_001291977;NM_001128310;NM_004684	5'UTR;5'UTR;5'UTR;5'UTR				TRUE				SPARCL1;SPARCL1;SPARCL1;SPARCL1	ENST00000503414.1;ENST00000438050.2;ENST00000418378.1;ENST00000282470.6	5'UTR;5'UTR;5'UTR;5'UTR	SPARCL1;SPARCL1;SPARCL1;SPARCL1;SPARCL1;SPARCL1;SPARCL1;SPARCL1;SPARCL1;SPARCL1;SPARCL1	ENST00000535835.1;ENST00000503414.1;ENST00000438050.2;ENST00000541496.1;ENST00000543631.1;ENST00000458304.2;ENST00000434434.1;ENST00000418378.1;ENST00000282470.6;ENST00000512317.1;ENST00000509407.1	TSS200;5'UTR;5'UTR;5'UTR;5'UTR;5'UTR;5'UTR;5'UTR;5'UTR;5'UTR;5'UTR	NA	NA
cg00917561	0.203828	0.438366	5.10125e-08	9.16673e-06	chr2	122140484	-		OpenSea	TGCTGTGATCCAGTTGGATGGCGTTCAGAGACAGCACAAGCTGTTTCCTTCTGAAACAAC[CG]TAGCACCACTAGAGGGCTAGCATGTTAAGTCTCAGCTGGGCAGCTCAGAGTGCTGGGTCA	CGGTTGTTTCAGAAGGAAACAGCTTGTGCTGTCTCTGAACGCCATCCAAC	CLASP1;CLASP1;CLASP1;CLASP1	NM_001142274;NM_001142273;NM_015282;NM_001207051	Body;Body;Body;Body				NA							CLASP1;CLASP1	ENST00000472776.1;ENST00000452274.2	3'UTR;3'UTR	NA	NA
cg00918494	0.54767	0.688403	4.21515e-08	7.98323e-06	chr1	100251529	-		OpenSea	TATGGTAACAAAAATGAGATTTGTTATAGGCAAAGACAGAACCATCAAGTACACAATGTC[CG]AAGGCCTTTTTCATTTTTATTTTACTTAAATGCCTTTCATCTGTCAAAAAAAAAATTAAC	CGGACATTGTGTACTTGATGGTTCTGTCTTTGCCTATAACAAATCTCATT							NA				U4	ENST00000364621.1	TSS1500	U4	ENST00000364621.1	TSS1500	NA	NA
cg00922785	0.622648	0.245204	4.13971e-06	0.000239497	chr10	104001995	+	chr10:104000254-104001741	S_Shore	GAAGGTGACTTCGTGGAGACAGCAGGGTTTGGAATGATACAAACCAAAGTAGTATTCCAA[CG]CTGCCACGAACTGCACCATCACTGAGTGAACTTGGACGAGTAACTATCATCTCCCTCCCC	CGCTGCCACGAACTGCACCATCACTGAGTGAACTTGGACGAGTAACTATC	PITX3	NM_005029	TSS1500				NA				PITX3;RP11-242B12.5	ENST00000370002.3;ENST00000556056.1	TSS1500;5'UTR	PITX3;RP11-242B12.5	ENST00000370002.3;ENST00000556056.1	TSS1500;5'UTR	NA	NA
cg00923634	0.676699	0.782376	1.4218e-06	0.000106395	chr1	25968448	+		OpenSea	TATTGAAAACACCTACCATCTATTGAGTCTCAGTTGCAAGAGCTGAAGGAAAGACAAAGA[CG]AGTCTCTGGCTTTAAGGAATTTTATTGTGTAATCTTGGCATGTACTGGAATCACTTCTAA	CGAGTCTCTGGCTTTAAGGAATTTTATTGTGTAATCTTGGCATGTACTGG	MAN1C1	NM_020379	Body				TRUE				MAN1C1;MAN1C1	ENST00000374331.5;ENST00000263979.3	5'UTR;5'UTR	MAN1C1;MAN1C1	ENST00000374331.5;ENST00000263979.3	5'UTR;5'UTR	NA	TRUE
cg00929322	0.596239	0.781746	1.37824e-07	1.88714e-05	chr7	122900147	-		OpenSea	TGTGCCAGAGAATTTAAATGTCGAGCACCTGGATTCCCAGATGTTTACCAGTTTCAGTCA[CG]CAAAACCCTCTACTAACCTGTGCTCCCTGAATAATAATTTTGAAGGCATTGGGTAGTTAT	TTTAAATGTCGAGCACCTGGATTCCCAGATGTTTACCAGTTTCAGTCACG							TRUE										NA	TRUE
cg00931520	0.648517	0.436169	2.17489e-05	0.000857739	chr16	1231484	+	chr16:1230112-1230317	S_Shore	TGGGGGTCTGCTCCAGTTCCGGCAGAACATCCTGGGTGGTCGTGCCCCCGAGGTCCTTGC[CG]GTGTGGCTGCACGCTGCCACCAAGTGGCTGGCAGGGCCTCAAGCTTCCCGCAGGCACGGA	GGAAGCTTGAGGCCCTGCCAGCCACTTGGTGGCAGCGTGCAGCCACACCG	CACNA1H;CACNA1H	NM_021098;NM_001005407	Body;Body				NA	16:1171349-1171544									NA	TRUE
cg00932510	0.483432	0.291074	2.32912e-05	0.000904369	chr22	30782804	+	chr22:30783010-30783620	N_Shore	TCCATCTGTGTGGCAAGGGGCCATGAGCAGAGGGAGGTAGGGTGTGGTGGGGGAGGGAGC[CG]GGGTCATCACAGTGGATGCCAAGGCCAGAGTTCCCAGAGCATCTGGCTCTCTGGTTTGGG	CGGGGTCATCACAGTGGATGCCAAGGCCAGAGTTCCCAGAGCATCTGGCT	RNF215	NM_001017981	Body				NA		22:30782565-30783970	Promoter_Associated				RNF215;RNF215;RNF215;MTMR3	ENST00000473077.1;ENST00000473077.1;ENST00000431544.1;ENST00000464734.1	3'UTR;1stExon;5'UTR;5'UTR	NA	TRUE
cg00933612	0.331275	0.709474	1.77448e-05	0.000732085	chr5	145921933	-		OpenSea	TAGAGCCAAACTAATTACCTCAAATACACAGCGCAGTGGTGTCCTGTATAGAGGAGCGCT[CG]CTCTAACTGCCCTGTGTGCCAGAATAACTAGCTGGCCCTCGTGGGTGCCGTTCTGCAGGT	AATTACCTCAAATACACAGCGCAGTGGTGTCCTGTATAGAGGAGCGCTCG							NA		5:145921448-145922680	Unclassified							NA	NA
cg00936756	0.656312	0.791496	1.91443e-07	2.39752e-05	chr19	34952086	-		OpenSea	ACTCGTTGATCCTATACCTCCTTGGTCACTTTTGCAGCTCATTTCTTGAGTTGCTGTTCT[CG]TTTTTTCCATGTCCCAGTTTTTGCCAGTGTACTGTTATTTTCGAAGGTTTCTAGGCCCTG	CGAGAACAGCAACTCAAGAAATGAGCTGCAAAAGTGACCAAGGAGGTATA	UBA2	NM_005499	Body				TRUE				UBA2	ENST00000542624.1	3'UTR	UBA2	ENST00000542624.1	3'UTR	NA	NA
cg00938619	0.581404	0.190065	7.55913e-08	1.21891e-05	chr5	111753803	-	chr5:111754477-111756222	N_Shore	GGGCGGGGGGGCGGTTTCCCTTCACCAGACTCAGCTGTTGCCTTATCTAAAATGCCTTAG[CG]ATCTAAAACTGAAAGAGAAAGATAAACAAAACAACAAAACGCTCCGGATTTAGATCTCCT	CGCTAAGGCATTTTAGATAAGGCAACAGCTGAGTCTGGTGAAGGGAAACC	EPB41L4A;FLJ11235	NM_022140;NR_027706	Body;TSS1500				NA		5:111753789-111753999	Unclassified_Cell_type_specific				EPB41L4A	ENST00000305368.4	3'UTR	NA	TRUE
cg00939768	0.144084	0.261759	1.64361e-05	0.000689729	chr21	17457413	+		OpenSea	ATTCCATGTTATTTTCCTTCTCCTGAATACAAAGAAAGAGTAGATTTCTTAGCCGCTAAA[CG]GTTAGGTGGCAGCATGTGACTAATTCTGGCTCATGAAATTTGATCAGAAGGCATCAGAGT	CGGTTAGGTGGCAGCATGTGACTAATTCTGGCTCATGAAATTTGATCAGA	MIR99AHG;MIR99AHG;MIR99AHG	NR_027790;NR_111005;NR_111004	Body;Body;Body				TRUE				LINC00478	ENST00000458468.1	5'UTR	LINC00478;LINC00478;LINC00478	ENST00000458468.1;ENST00000400178.2;ENST00000456342.1	5'UTR;5'UTR;5'UTR	NA	NA
cg00940786	0.596729	0.208909	1.10113e-05	0.000505793	chr17	66286993	+	chr17:66286541-66288532	Island	GGCACTCAAAGGCCAGGCGTGCCTTTAGGTATCTTCCGGGACCCAACTGTACCAGGGTCA[CG]GACATTCAACTCTCAGCTACCCACACCGGCGCGAGCGCGTCATCCCGGTGGCCCTGGGCA	CGGACATTCAACTCTCAGCTACCCACACCGGCGCGAGCGCGTCATCCCGG	ARSG;SLC16A6	NM_014960;NM_004694	5'UTR;5'UTR			DMR	NA	17:63798137-63798636			SLC16A6;ARSG	ENST00000327268.3;ENST00000452479.1	5'UTR;5'UTR	SLC16A6;ARSG	ENST00000327268.3;ENST00000452479.1	5'UTR;5'UTR	NA	TRUE
cg00940854	0.426274	0.668455	9.47637e-06	0.000450262	chr5	95901697	+		OpenSea	AAATATCATGGCAGGAGCCCATGAGGTGGGAGCACAATTTATCCTAACTGAAAATAGAGG[CG]GAGAATCATCAGCCCTAGTATCCCTGATACTAGAGTGAGGTTTCCATAGCAACCAGCTGA	TATGGAAACCTCACTCTAGTATCAGGGATACTAGGGCTGATGATTCTCCG	LOC101929710	NR_130776	Body		chr5:95901647-95901647		NA							CTD-2337A12.1	ENST00000502645.1	5'UTR	NA	NA
cg00941419	0.574938	0.718155	1.53858e-06	0.000112906	chr16	87523084	+		OpenSea	ATCTATAAAACATGCCTTGCTTTAAGTTAGCAAACCTCTATAAAAAGGAATGTTAAAAGC[CG]GAGAGGCCATAGAGGAGAAAGCAGCATTTACTGCACCTCTGCTGGAAGCTCATGTATGTT	CTTCCAGCAGAGGTGCAGTAAATGCTGCTTTCTCCTCTATGGCCTCTCCG	ZCCHC14	NM_015144	Body			RDMR	NA										NA	TRUE
cg00942219	0.182976	0.0382432	6.60738e-06	0.00034154	chr16	85203635	+	chr16:85203157-85203941	Island	GGCGACGACGACGAGGACGACGGTGGCGGCCCCCGGCTGCGCGGGGCCGCGGAGGAGACG[CG]AGACTCCGACCTGTCGGAGCTGTCGGACACCGACCCCCTTTCCGAGCCCGACCCGCCCGC	GGCTCGGAAAGGGGGTCGGTGTCCGACAGCTCCGACAGGTCGGAGTCTCG							NA	16:83759650-83762911	16:85202372-85203910	Unclassified	CTC-786C10.1	ENST00000574293.1	TSS1500	CTC-786C10.1	ENST00000574293.1	TSS1500	NA	TRUE
cg00943360	0.630783	0.160681	1.71446e-06	0.00012216	chr15	32607923	+	chr15:32604647-32607825	S_Shore	CCCGGGCCGCCCGCCGCCCCCGCGCGCGTCCATGGCGAGGCGGCGCCCGGCAGTGCGGAG[CG]GAGCCCCCGACCAGTTCAAGTCTTTACATGGCCGTTACCCCAGACATCTGCCTGAAGCCT	CGGAGCCCCCGACCAGTTCAAGTCTTTACATGGCCGTTACCCCAGACATC							NA	15:30391988-30395216									NA	TRUE
cg00946992	0.179544	0.654143	4.29324e-12	9.64705e-09	chr14	29227969	+		OpenSea	GGCGTGGATATGCACGTGAGCGAAGTAAAAGTCGCTGGAGATGAGTTGGCTCCACTTGTC[CG]CCCTGGGGAGCAATCCTGGGGCAAAATCCAGTGCTAATTGATCCCAACCAGCCACATTAT	CGCCCTGGGGAGCAATCCTGGGGCAAAATCCAGTGCTAATTGATCCCAAC							NA	14:28297662-28297721			RP11-966I7.1;RP11-966I7.1;RP11-966I7.1	ENST00000551395.1;ENST00000546560.1;ENST00000549487.1	3'UTR;3'UTR;3'UTR	RP11-966I7.1;RP11-966I7.1;RP11-966I7.1	ENST00000551395.1;ENST00000546560.1;ENST00000549487.1	3'UTR;3'UTR;3'UTR	NA	TRUE
cg00948513	0.366231	0.619586	1.28541e-06	9.86266e-05	chr2	122258942	+		OpenSea	GTCCAGCAACTAACTGCCTGTGAAGACCTGCCTGTGGACACCCAGCAACCCCACTCATCA[CG]AGTGCACCACTCAGATGCCAGAATTCTGGCCCCAGCTCTACCAATGATATGTTTTTAAAA	CGAGTGCACCACTCAGATGCCAGAATTCTGGCCCCAGCTCTACCAATGAT	CLASP1;CLASP1;CLASP1;CLASP1	NM_001142274;NM_001142273;NM_015282;NM_001207051	Body;Body;Body;Body				NA							CLASP1;CLASP1	ENST00000474065.1;ENST00000480007.1	3'UTR;3'UTR	NA	NA
cg00949479	0.675835	0.805008	3.20875e-07	3.48672e-05	chr1	67083697	-		OpenSea	GTTTTAAAATGTGATCTGCTATTTATCACCTGTGTGACCTGGCATCAGGTGCTTCTCATG[CG]CCATGATATAGAATCAATATAATAGCTCCCATCTTATTAAATTGTGTTGAACTAAGATAA	GATCTGCTATTTATCACCTGTGTGACCTGGCATCAGGTGCTTCTCATGCG	SGIP1;SGIP1	NM_001308203;NM_032291	Body;Body				NA				SGIP1	ENST00000468286.1	5'UTR	SGIP1;SGIP1;SGIP1;SGIP1	ENST00000484988.1;ENST00000493564.1;ENST00000497055.1;ENST00000468286.1	5'UTR;5'UTR;5'UTR;5'UTR	NA	NA
cg00952857	0.428494	0.679914	5.27315e-10	3.48667e-07	chr1	234545133	-		OpenSea	TTCTAAGGTAAATTCGTTTTCAGAATTTGTCTAAACTATTCTTAGGCTATTCATCTACCC[CG]CAACAGGACAATGTCTGCTCTGTTTTAGCTTTCTCAATAGATTGTAAGCAAATCTCTTTG	CGGGGTAGATGAATAGCCTAAGAATAGTTTAGACAAATTCTGAAAACGAA	TARBP1	NM_005646	Body				NA		1:234544502-234545558	Unclassified_Cell_type_specific	TARBP1	ENST00000483404.1	TSS1500	TARBP1;TARBP1	ENST00000483404.1;ENST00000481183.1	TSS1500;3'UTR	NA	NA
cg00955482	0.34832	0.106127	4.00103e-06	0.000233035	chr18	712737	+	chr18:712232-713086	Island	CGGCAGCGCCGCGAGGCGGGGCACCGTCAGGGCATAGAGGGCGCTCATTGGCCGCGCGGC[CG]CACCCCGTGAACTTGGCCCCATGGGAGCTGCAGTCCCAGCTCCGGGCTCCCGGGGGCGCA	AGCCCGGAGCTGGGACTGCAGCTCCCATGGGGCCAAGTTCACGGGGTGCG	ENOSF1;ENOSF1;ENOSF1	NM_017512;NM_001126123;NM_202758	TSS200;TSS200;TSS1500				NA	18:702233-703072	18:711414-713159	NonGene_Associated	ENOSF1;ENOSF1;ENOSF1	ENST00000539164.1;ENST00000383578.3;ENST00000340116.6	TSS200;TSS200;TSS1500	ENOSF1;ENOSF1;ENOSF1	ENST00000539164.1;ENST00000383578.3;ENST00000340116.6	TSS200;TSS200;TSS1500	NA	TRUE
cg00961326	0.63318	0.486062	7.48387e-07	6.55306e-05	chr16	58061220	+	chr16:58059380-58061477	Island	TGGCGTCCCTCCCGGGGCCCCGCTCTGGATGGGTCCCGCGGGTGACCAGGCGCGACATCC[CG]GCGTAGAGCCGAGTCCAGCCAGCGCCCCAGCTCCATGGTGTCTCCCGAGCGAGGACACCG	CGGCGTAGAGCCGAGTCCAGCCAGCGCCCCAGCTCCATGGTGTCTCCCGA	MMP15	NM_002428	Body				NA	16:56616818-56618978									NA	TRUE
cg00963378	0.724909	0.269194	6.05314e-06	0.000319279	chr13	20716638	-	chr13:20716137-20717372	Island	CGCGGGCCTGTCCCAGGGGCGCAGCGGTGTGCGCATAGTAGGGTGGGAACCCGATGGCAA[CG]GCGGGCGGCCGGGAGCTGGGGGGCAGGGGCGGGGGATCGGCTGTCCCCAGCGGGGCCTCG	CCAGGGGCGCAGCGGTGTGCGCATAGTAGGGTGGGAACCCGATGGCAACG	GJA3	NM_021954	Body			DMR	NA	13:19614225-19615500	13:20716176-20716641	Unclassified_Cell_type_specific							NA	TRUE
cg00965449	0.7064	0.831456	1.55646e-05	0.000661765	chr13	52205716	-		OpenSea	TCTATGGAGTTCTCCTAAGCCATGTGATCACTTCAGCACATTTTCTTTTCTTCTCCTTAC[CG]TCTAAATTTTGTTGAAATAATGAGAAACATTTGTTCATTTTTTTTACATTATGCTCCTTC	CGGTAAGGAGAAGAAAAGAAAATGTGCTGAAGTGATCACATGGCTTAGGA	WDFY2	NM_052950	Body				NA										NA	NA
cg00965748	0.560335	0.295297	2.2088e-05	0.000868728	chr20	39319235	+	chr20:39316550-39319987	Island	GGCCCAGGGCCACCGGGTGAGAAACCTCCCCGGAGGGCAGACGGGGAGACCGAAGCACAC[CG]CACTAGGCATCCAGACTGGGCTTGGGAGCCGCGCACCCTCCCTACCCAGATCCAGGATGG	TGGGTAGGGAGGGTGCGCGGCTCCCAAGCCCAGTCTGGATGCCTAGTGCG	MAFB	NM_005461	TSS1500			DMR	NA	20:38749362-38752944	20:39318258-39320111	Unclassified	MAFB	ENST00000373313.2	TSS1500	MAFB	ENST00000373313.2	TSS1500	NA	TRUE
cg00965931	0.499758	0.0287201	5.55762e-09	1.90448e-06	chr18	20716593	+	chr18:20714968-20717071	Island	CGGCAGCACCAGCGCCTTCGAGCAGCTGCAGAGGTCCCGGTGAGTATCCGGGATGCGACG[CG]CACCCAACCCTGCGTCCCGCCCGGCGCTCCCAGCCTCCCCGCGGTCTCTGGGCTACGGGA	GAGACCGCGGGGAGGCTGGGAGCGCCGGGCGGGACGCAGGGTTGGGTGCG	CABLES1;CABLES1;CABLES1	NM_001256438;NR_023359;NM_001100619	5'UTR;Body;Body				NA	18:18968768-18971069			AC105247.1;CABLES1	ENST00000411067.1;ENST00000400473.2	TSS200;5'UTR	AC105247.1;CABLES1	ENST00000411067.1;ENST00000400473.2	TSS200;5'UTR	NA	NA
cg00966974	0.28373	0.0622408	6.46173e-07	5.85242e-05	chr1	182573524	-	chr1:182573375-182573760	Island	GGAAGCAAAGGCGCGGTAGCAGGTGCTAGTCAACTGCGGTTGGGTTTAGCAGCCTGCAAG[CG]CCCAGACTGAGCGGCCGCTGCTTTAAATCCCCTCGGAGGAGCGGGGCGGGGCTGGGCACT	GCGGTAGCAGGTGCTAGTCAACTGCGGTTGGGTTTAGCAGCCTGCAAGCG	RGS16;RGS16	NM_002928;NM_002928	5'UTR;1stExon	high-CpG:180840142-180840153			NA	1:180839999-180840456	1:182572531-182574164	Promoter_Associated	RGS16;RGS16	ENST00000367558.5;ENST00000367558.5	1stExon;5'UTR	RGS16;RGS16	ENST00000367558.5;ENST00000367558.5	1stExon;5'UTR	NA	TRUE
cg00968538	0.871272	0.74373	5.71109e-07	5.32836e-05	chr5	1254426	+	chr5:1253737-1253951	S_Shore	GGTCAGGCCCGGGGGCGTCTGCACTTCAGCAGCATCTGAGGCTGCTCGCCCCACACAGGG[CG]TTCAAGGATGACCCCTGGGCAGGTGGGGCCCGCACTGGCCTCCACCCACACTTGCCTGTC	TGGGTGGAGGCCAGTGCGGGCCCCACCTGCCCAGGGGTCATCCTTGAACG	TERT;TERT	NM_198255;NM_198253	Body;Body				NA	5:1307304-1307949	5:1254333-1254711	Unclassified_Cell_type_specific	TERT	ENST00000296820.5	3'UTR	TERT;TERT;TERT	ENST00000484238.2;ENST00000296820.5;ENST00000460137.2	3'UTR;3'UTR;3'UTR	NA	TRUE
cg00972636	0.537344	0.661607	8.48632e-06	0.000414233	chr1	22416016	-		OpenSea	TAAAGTCCTTCTAGTTGGTACTGTTGCACAATTAACACTTTTTAAATGTCTGAACCTTTC[CG]TTCTGGGAAACCAGTTTACTCTGAAATCTTGATTAATCACATTCAGATATGTCATTGAAC	CGGAAAGGTTCAGACATTTAAAAAGTGTTAATTGTGCAACAGTACCAACT	CDC42;CDC42;CDC42	NM_044472;NM_001039802;NM_001791	Body;Body;Body				NA				CDC42	ENST00000498236.1	5'UTR	CDC42	ENST00000498236.1	5'UTR	NA	NA
cg00975680	0.269362	0.427675	9.32134e-06	0.000444985	chr1	229618011	+		OpenSea	GAGGTACAGAATGTTAGAACTGTAAAAGCACTTTGGAATCTGTTGTCTCTGTGAGTGAGC[CG]CTATGCATCAGACACCAGTATGAGTGGGATTATGGAACCATGGGCTCAGAACTGGGGGAA	TGAGCCCATGGTTCCATAATCCCACTCATACTGGTGTCTGATGCATAGCG	NUP133	NM_018230	Body				NA		1:229617716-229618402	Gene_Associated							NA	TRUE
cg00976121	0.474403	0.129277	2.77347e-13	1.28744e-09	chr11	44586372	-	chr11:44586602-44587404	N_Shore	GGCCAGTCCAGGCAAGCTGGGGCAGCTCAAGCCTGTGACTCAGGACCTGAGGCTGGATCC[CG]CTCACGCCCGCCTCCATGAGATTCAGAGCCCTCGACTTCCCTTCTCTGAGCCTTAAACTG	CGGGATCCAGCCTCAGGTCCTGAGTCACAGGCTTGAGCTGCCCCAGCTTG	CD82;CD82	NM_002231;NM_001024844	TSS1500;TSS1500				NA		11:44585945-44587858	Promoter_Associated	CD82;CD82	ENST00000227155.4;ENST00000342935.3	TSS1500;TSS1500	CD82;CD82;CD82;CD82;CD82;CD82;CD82;CD82	ENST00000227155.4;ENST00000342935.3;ENST00000532544.1;ENST00000529277.1;ENST00000525210.1;ENST00000525898.1;ENST00000527737.1;ENST00000524704.1	TSS1500;TSS1500;TSS1500;TSS1500;TSS1500;TSS1500;TSS1500;TSS1500	NA	NA
cg00977511	0.527707	0.699693	5.58822e-06	0.000300545	chr1	72652405	-		OpenSea	AAATCTGGTCTCAATCTGAGGCTTCCCAATTCTCAATGTATTAATGTTAGAATTTCATTG[CG]TTCTGTGTTAAGAATCTACTGCTTCTTTTAAAACAGGAATGATAAATTCTCATAGAGTAC	CGCAATGAAATTCTAACATTAATACATTGAGAATTGGGAAGCCTCAGATT	NEGR1	NM_173808	Body				NA										NA	NA
cg00977640	0.57998	0.682777	2.02684e-05	0.000812453	chr1	44818695	+	chr1:44820657-44821113	N_Shore	CAATACCAAGGATCAAATCCCCATGAAGGATACTACACCTCAAACTCTAAACTCAAACTT[CG]GGATAACTGCTATCTATGTGCAAAGACAGTGCCCCCACAGAGCTTTCAGAAACTATTAGT	CGGGATAACTGCTATCTATGTGCAAAGACAGTGCCCCCACAGAGCTTTCA	ERI3;ERI3;ERI3;ERI3;ERI3	NM_001301701;NM_001301699;NM_001301698;NM_001301700;NM_024066	5'UTR;5'UTR;5'UTR;5'UTR;Body				NA				ERI3;ERI3;ERI3	ENST00000537474.1;ENST00000495828.1;ENST00000372253.5	TSS200;3'UTR;5'UTR	ERI3;ERI3;ERI3	ENST00000537474.1;ENST00000495828.1;ENST00000372253.5	TSS200;3'UTR;5'UTR	NA	NA
cg00981200	0.538875	0.732068	7.1548e-06	0.000363447	chr8	127409652	-		OpenSea	CAAAGGTAGTAGTGGCTTCTTGCTTTTTCTGGGTGTCAAACTTCTGGGTTCCTTCTCTCT[CG]TTTGATTTATCACACTCTTTCATTCCTATGTAACACATTCAATGTAGTAAATTTCCTTCT	CGAGAGAGAAGGAACCCAGAAGTTTGACACCCAGAAAAAGCAAGAAGCCA							NA										NA	NA
cg00982984	0.511122	0.181766	1.02429e-05	0.000478243	chr15	45493530	+	chr15:45490945-45491252	S_Shelf	ACACATTCTTCTGGGAAGCTAACTCTAAAAGCTGTTACCTGGCCAGGGCTGAAATTATAA[CG]GACAATGAAGTGTGCACAAAAAGTTCGGTGCACACTCTGGGGCTTTCCTTTCTCATCTGC	CGGACAATGAAGTGTGCACAAAAAGTTCGGTGCACACTCTGGGGCTTTCC	SHF	NM_138356	TSS200				NA				CTD-2651B20.6;SHF;SHF	ENST00000563103.1;ENST00000318390.6;ENST00000361989.2	TSS1500;TSS1500;TSS200	CTD-2651B20.6;SHF;SHF;SHF	ENST00000563103.1;ENST00000318390.6;ENST00000361989.2;ENST00000561278.1	TSS1500;TSS1500;TSS200;TSS1500	NA	TRUE
cg00986824	0.539976	0.0774203	2.38569e-14	1.83401e-10	chr12	75601465	-	chr12:75601081-75601752	Island	GTGCGGTAGTAATTGAGCACATAGGCGAAGACGCCCGGGTGCCGGTCGAAGAAGAACTCG[CG]GCCGCCACCGGGATGGTCGCTGGCCCTGCCGCCGCGGGAACTGCAGTTGCCCGCGCCGCC	TTGAGCACATAGGCGAAGACGCCCGGGTGCCGGTCGAAGAAGAACTCGCG	KCNC2;KCNC2;KCNC2	NM_139137;NM_153748;NM_139136	Body;Body;Body				NA	12:73887390-73888092			KCNC2	ENST00000548513.1	1stExon	KCNC2	ENST00000548513.1	1stExon	NA	TRUE
cg00987237	0.46182	0.846387	3.70373e-11	4.89283e-08	chr4	140770576	+		OpenSea	GGTCCCTAGGAACTTCCTGTAGAAAAGGATTAGAGCAAATAACTGAAAGGAGGGTCCAGA[CG]CTGTGTCTACAAGAAACACGGGGCAGAGACAAATAAGACAAGATCTGACCTCAAAGCTGA	CGCTGTGTCTACAAGAAACACGGGGCAGAGACAAATAAGACAAGATCTGA	MAML3	NM_018717	Body				NA										NA	NA
cg00989729	0.676507	0.853453	1.07027e-07	1.57751e-05	chr4	52881607	+		OpenSea	AATATTATCTGGGTAGCAGGGGTAAGGAATGCTCACCCCTCGATGCCTTGTTAGAGTATA[CG]ATTCGATGCCTTGTTAGAGTATACGATTTGATGCCTTGTTAGAGTATACGATTCTCAAGC	CGATTCGATGCCTTGTTAGAGTATACGATTTGATGCCTTGTTAGAGTATA	LRRC66	NM_001024611	Body				NA										NA	NA
cg00990927	0.461486	0.629322	2.48593e-07	2.89027e-05	chr1	63715627	+		OpenSea	ATTAAATAGCCTAAAATACACTGAATTTAAGTGAATTTTGAAAATATTTTAAATGTCTCC[CG]CAAAAAACAAAATACAGTTGGTCCTCAAACAATGTGAGTTTGAACTGAGTGGGTCCACTT	TCAGTTCAAACTCACATTGTTTGAGGACCAACTGTATTTTGTTTTTTGCG	LINC00466	NR_038252	Body				NA				RP11-335E6.3;LINC00466	ENST00000449140.1;ENST00000447183.1	TSS200;3'UTR	RP11-335E6.3;LINC00466;LINC00466	ENST00000449140.1;ENST00000447183.1;ENST00000418086.1	TSS200;3'UTR;3'UTR	NA	NA
cg00992398	0.113843	0.386145	1.6297e-06	0.000117751	chr1	203087092	-		OpenSea	TAGCGCGGCGGAGCAGGGAACTCAGGCTGCGGGACTGGGGTCTGGCCCTGCCCAGCTCCT[CG]CCCACGCCCAGGCTTCCGTTAGGCCAGCAGGGGGACCCCGAGCCCCGGACAACAGCCCTG	GCAGGGAACTCAGGCTGCGGGACTGGGGTCTGGCCCTGCCCAGCTCCTCG							NA	1:201353492-201353756	1:203086667-203087666	Unclassified	ADORA1	ENST00000309502.3	5'UTR	ADORA1	ENST00000309502.3	5'UTR	NA	TRUE
cg00993365	0.282177	0.430769	2.36376e-05	0.000915138	chr2	53994269	-	chr2:53994891-53995169	N_Shore	AGTTTCCCCCTAGAAAAGTGTACACCCCAAATTTTGTATACAAATTCAGGTTCCCCAGCT[CG]TTTCCAAAGCCTTTACAGGGGCCCCAAGTTAAGAACATTTGCCTGCTCTTTTGTGAACAA	CGAGCTGGGGAACCTGAATTTGTATACAAAATTTGGGGTGTACACTTTTC	CHAC2;GPR75-ASB3;ASB3;ASB3;ASB3	NM_001008708;NM_001164165;NM_001201965;NM_145863;NM_016115	TSS1500;Body;5'UTR;5'UTR;5'UTR				NA		2:53994240-53995654	Promoter_Associated	CHAC2;ASB3;ASB3;ASB3;ASB3;ASB3	ENST00000295304.4;ENST00000482829.1;ENST00000406687.1;ENST00000394717.2;ENST00000446049.2;ENST00000263634.2	TSS1500;3'UTR;5'UTR;5'UTR;5'UTR;5'UTR	CHAC2;ASB3;ASB3;ASB3;ASB3;ASB3;ASB3;ASB3;ASB3;ASB3;ASB3;ASB3	ENST00000295304.4;ENST00000482829.1;ENST00000489508.1;ENST00000482134.1;ENST00000498475.2;ENST00000470916.1;ENST00000459916.1;ENST00000406687.1;ENST00000394717.2;ENST00000414369.2;ENST00000446049.2;ENST00000263634.2	TSS1500;3'UTR;3'UTR;3'UTR;3'UTR;3'UTR;3'UTR;5'UTR;5'UTR;3'UTR;5'UTR;5'UTR	NA	NA
cg00994896	0.235471	0.0456453	2.51221e-08	5.47273e-06	chr17	38519807	-	chr17:38518965-38520264	Island	AGCGCCGCCCGCCTCCTTGCCTGCCCGGTGCATGGAGTAGACGACGAACAGCACCGGGGG[CG]CCGAGAGCAGCAGGATGTGGAAGAGCCAGAAGCGGTAGTGGGAGACCGGGAAGGCGCGGT	CGCCCCCGGTGCTGTTCGTCGTCTACTCCATGCACCGGGCAGGCAAGGAG	GJD3	NM_152219	1stExon				NA	17:35772492-35773885	17:38518343-38520041	Promoter_Associated	GJD3	ENST00000337376.4	1stExon	GJD3	ENST00000337376.4	1stExon	NA	TRUE
cg00996875	0.593308	0.699469	2.04565e-07	2.51564e-05	chr1	9825174	-	chr1:9822576-9822817	S_Shelf	GAAATGTCATTTTTTTTTCAAATACCTTAATATTTCAACATTTAAAAAAATTGGGCCAGG[CG]CAGTGGCTCAGGCCTGTAATCCCAGCACTTTGGGAGGCAGGCAGATCAACTGAGGTCAGG	CGCCTGGCCCAATTTTTTTAAATGTTGAAATATTAAGGTATTTGAAAAAA	CLSTN1;CLSTN1	NM_001009566;NM_014944	Body;Body				NA										NA	TRUE
cg00999095	0.483528	0.772258	1.9343e-05	0.000783231	chr1	90598669	-		OpenSea	GGGCACGTGCTCATTGGCTGCAGCTGTGAATTCCATACCCAGTACATCCTGTAAATCTGG[CG]TAATCTGTAAAATAAATGGCGAGCCAGATTCTCAGACTAGCAGAGCTAGAAGTGACAGGG	CGCCAGATTTACAGGATGTACTGGGTATGGAATTCACAGCTGCAGCCAAT							NA										NA	NA
cg01000576	0.73943	0.846624	8.72764e-06	0.000423163	chr1	175451317	+		OpenSea	TTAGCAACTGGCACAAGAACAAGCACAGAGTCCTTGATAAATGTTTGTTGAATGAAAGAA[CG]AGTGAATGAAGTCCACTAGGCTGCACTGTGGTGATCCAAATCAGCTTCCAAGATGACCGC	CGAGTGAATGAAGTCCACTAGGCTGCACTGTGGTGATCCAAATCAGCTTC	TNR	NM_003285	5'UTR				NA		1:175450300-175451564	Unclassified	TNR;TNR	ENST00000263525.2;ENST00000367674.1	5'UTR;5'UTR	TNR;TNR	ENST00000263525.2;ENST00000367674.1	5'UTR;5'UTR	NA	NA
cg01000615	0.493242	0.219411	2.78603e-10	2.24738e-07	chr1	145562817	-		OpenSea	CCAAGCCACAGAGGAAGTGGCTGAGCTAAGGGCCCGGGAGGCAGCCAGCCTACGGCAACA[CG]AGAAAACTCGGGGTTCGCTGGTGGCCCAGGCTCAGGCTTGGGGCCAGGAGCTAAAGGCTC	CGTGTTGCCGTAGGCTGGCTGCCTCCCGGGCCCTTAGCTCAGCCACTTCC	ANKRD35	NM_144698	Body				TRUE	1:144274049-144274365	1:145562544-145563368	Promoter_Associated_Cell_type_specific							NA	TRUE
cg01012080	0.473027	0.624697	1.2026e-06	9.38872e-05	chr1	43660603	-		OpenSea	GGTTTCCTTTAGTTTTTTGGACACACTTGGAATGGCTAATTTCAAGCCTTTGGGTGCTGC[CG]TAGGGAATTTTGTTGCCTGTGAACAGAAAAATGCAAATTAATACAACTCTGAGATGCTTC	CGGCAGCACCCAAAGGCTTGAAATTAGCCATTCCAAGTGTGTCCAAAAAA	CFAP57;CFAP57;CFAP57	NM_001167965;NM_152498;NM_001195831	Body;Body;Body				NA				RN5S46	ENST00000362370.1	TSS1500	RN5S46;EBNA1BP2;EBNA1BP2;EBNA1BP2;WDR65	ENST00000362370.1;ENST00000466927.1;ENST00000474566.1;ENST00000461557.1;ENST00000533339.1	TSS1500;3'UTR;3'UTR;3'UTR;3'UTR	NA	NA
cg01014382	0.463342	0.580028	1.45479e-05	0.000627994	chr19	41396380	-		OpenSea	TTTCCTTGTTGTCTATCAAGACTTTCTAAAACAACATGGTCTGCCAGCTGTGGTGGCTCA[CG]CCTGTAATTCCAGCACTTTGGGAGGCTAACGGGGGGGCGGGTGGTGGATCACTTGAGGCC	CTATCAAGACTTTCTAAAACAACATGGTCTGCCAGCTGTGGTGGCTCACG	CYP2G1P	NR_040249	TSS1500				NA				CYP2G1P	ENST00000252909.4	TSS1500	CYP2G1P	ENST00000252909.4	TSS1500	NA	NA
cg01016119	0.738136	0.395131	2.90727e-09	1.21324e-06	chr3	56835282	-	chr3:56835650-56836210	N_Shore	TGTCCTGTTTTTGCTGCCAAAGGGCTGCAAGGCCAAGTCTGACAGGTGAGAGGGCTGGTA[CG]TCCCTCTGCTCTCACAACCCAGGCAAAAAAAACTCGCTTAAAGGGTAGCGACACTGGGGC	GCTGCCAAAGGGCTGCAAGGCCAAGTCTGACAGGTGAGAGGGCTGGTACG	ARHGEF3;ARHGEF3	NM_001128615;NM_019555	Body;Body				TRUE				ARHGEF3	ENST00000498517.1	3'UTR	ARHGEF3;ARHGEF3;ARHGEF3;ARHGEF3;ARHGEF3	ENST00000481422.1;ENST00000498517.1;ENST00000477833.1;ENST00000477440.2;ENST00000486829.1	3'UTR;3'UTR;3'UTR;3'UTR;3'UTR	NA	TRUE
cg01016257	0.442451	0.697717	3.74131e-06	0.000221018	chr1	117640285	-		OpenSea	GACTCCCCTGAATTCCTGAGCTAGCAAGCCTTCAAATGACTACTCAAAATAGTTCATTCA[CG]TTATTGTTAGTCTAACATCTGTTTCCATGGAAACGGGGAGCATAGCTTTTCCTCATGGCT	CGTGAATGAACTATTTTGAGTAGTCATTTGAAGGCTTGCTAGCTCAGGAA	TTF2	NM_003594	Body				NA							TTF2;TTF2;TTF2	ENST00000463696.1;ENST00000480701.1;ENST00000492682.1	5'UTR;TSS1500;5'UTR	NA	NA
cg01018117	0.682309	0.548392	1.37696e-05	0.000601817	chr6	32707456	+		OpenSea	GGACGGAAGACTATCCTGAGGCTACGGCTGTGATTGGTAAAGAAGCAGCAATCACTCTTT[CG]AGAGATGTGCCTGGTTATTTTTGTAGTTTGGACAATATTCATGTTTTGTCTGGGTGCAGA	CGAGAGATGTGCCTGGTTATTTTTGTAGTTTGGACAATATTCATGTTTTG							NA										NA	TRUE
cg01020484	0.25938	0.436999	7.34653e-06	0.000371193	chr14	74185294	+	chr14:74185482-74185994	N_Shore	GCAGCAGAAATCGGAGTGTGAGAGGCGGTGGAGTCCCTCCCGAGGGGACCGGGACTCTCC[CG]GTCCAGGAAAGCACGAGGACAGCTTCCGACAGACCAAATGCAAAGAGAGCTGGATCCTGG	TCTCTTTGCATTTGGTCTGTCGGAAGCTGTCCTCGTGCTTTCCTGGACCG	C14orf43;C14orf43	NM_194278;NM_001043318	3'UTR;3'UTR				TRUE	14:73254975-73255152			C14orf43;C14orf43	ENST00000394071.2;ENST00000286523.5	3'UTR;3'UTR	C14orf43;C14orf43;C14orf43	ENST00000394071.2;ENST00000286523.5;ENST00000476562.1	3'UTR;3'UTR;3'UTR	NA	TRUE
cg01027305	0.742508	0.863364	2.30622e-05	0.000898314	chr1	92013964	-	chr1:92011829-92012062	S_Shore	GTAGACAACTTTCTAATAATTGAACTGTCTGTCCTGCCTGCTAGTTGCCTTTGTTATTAT[CG]TAATCATTAGTGGTTGCTGGAAGTGGGGCAGGGTGTGTTTAGGTGAGCAGGGGGGAGTGT	CTAATAATTGAACTGTCTGTCCTGCCTGCTAGTTGCCTTTGTTATTATCG					chr1:92013932-92013932		NA										NA	NA
cg01030121	0.577069	0.25806	8.44049e-07	7.16362e-05	chr12	72667236	-	chr12:72665683-72667551	Island	CGGTTTTTTCCTCTACCCGCAAACCCAGGTCTTAGTGGTGGTGCTGAATAGGACACTGGA[CG]CGCAGAGGAATTACAATCTGAAGATTATCTACAACGCGCTCATCGAGAATGAGCTCCTGG	CTACCCGCAAACCCAGGTCTTAGTGGTGGTGCTGAATAGGACACTGGACG	LOC283392;TRHDE;LOC283392	NR_026837;NM_013381;NR_026836	Body;1stExon;Body	high-CpG:70953461-70953614			NA	12:70951635-70954351			TRHDE;AC087886.1;AC087886.1	ENST00000261180.4;ENST00000426250.2;ENST00000426250.2	1stExon;1stExon;3'UTR	AC087886.1;TRHDE;AC087886.1;AC087886.1;TRHDE;TRHDE;AC087886.1;AC087886.1;TRHDE	ENST00000550334.1;ENST00000261180.4;ENST00000435350.1;ENST00000426250.2;ENST00000552503.1;ENST00000547300.1;ENST00000552396.1;ENST00000426250.2;ENST00000548156.1	TSS1500;1stExon;TSS1500;1stExon;TSS1500;TSS200;3'UTR;3'UTR;5'UTR	NA	TRUE
cg01032602	0.712278	0.834598	1.12494e-07	1.63156e-05	chr1	40960710	+		OpenSea	AGCGCTTATATCATGGCATTATGATGGAAAGTTTCATGAGGGATGATATAATTTATTCCA[CG]TTGAGAAAAGTCTCCACATATGATGATGTCTTAGAAAGGCACCAGGAAACTTGTATGAGA	TTCCTGGTGCCTTTCTAAGACATCATCATATGTGGAGACTTTTCTCAACG	ZFP69	NM_198494	Body				NA				RP11-656D10.3	ENST00000450713.1	3'UTR	RP11-656D10.3	ENST00000450713.1	3'UTR	NA	NA
cg01043252	0.85751	0.703762	1.73826e-05	0.000719884	chr5	127552808	-		OpenSea	GGGGCTCTGCCAGGAGCCACGCTGTTGATCCTGGCAGGGTTTCTGCCCTGATGTGGACAG[CG]CATGGGAGATCAACCTCCCCTCACTCTCACTCCCCATTCCCACTCCCCTGCTGGGTAGGA	CGCTGTCCACATCAGGGCAGAAACCCTGCCAGGATCAACAGCGTGGCTCC							TRUE										NA	NA
cg01046070	0.422318	0.66287	1.43557e-06	0.000107023	chr16	74730199	+	chr16:74734152-74734572	N_Shelf	ATAAACTTGTATTGCATGTAAACCGTTAATATTTTCAGGTTGATATGTTTATATCAGTTT[CG]TCTATTACAGATATATCCTGCTAAAGCATAGAGGTTTCAGGGGCCAGGCGGGTAATTCAA	CGTCTATTACAGATATATCCTGCTAAAGCATAGAGGTTTCAGGGGCCAGG	MLKL;MLKL	NM_001142497;NM_152649	5'UTR;5'UTR				NA		16:74729755-74730255	Promoter_Associated	MLKL;MLKL	ENST00000306247.7;ENST00000308807.7	5'UTR;5'UTR	MLKL;MLKL;MLKL;MLKL	ENST00000575686.1;ENST00000306247.7;ENST00000308807.7;ENST00000573267.1	5'UTR;5'UTR;5'UTR;5'UTR	NA	TRUE
cg01047414	0.45998	0.0789347	7.01088e-08	1.15205e-05	chr10	13341660	-	chr10:13341377-13342223	Island	CCTGTGCACCGTGCGCCTGTGATTGGACATCTCTGGGTCTCTGGACAGCTGCCGGGGTCA[CG]CGCCGCCGGTGAAACGACGTCTCCACAAAGAGAGGAGCAGAGGCCCCCAGGGATCCCGGA	GCGCCTGTGATTGGACATCTCTGGGTCTCTGGACAGCTGCCGGGGTCACG	PHYH;PHYH;PHYH	NM_001037537;NM_001037537;NM_006214	1stExon;5'UTR;Body				NA	10:13381338-13382225	10:13341319-13342389	Unclassified_Cell_type_specific	PHYH;PHYH	ENST00000396913.2;ENST00000396913.2	1stExon;5'UTR	PHYH;PHYH;PHYH;PHYH	ENST00000463730.1;ENST00000396913.2;ENST00000453759.2;ENST00000396913.2	3'UTR;1stExon;TSS200;5'UTR	TRUE	TRUE
cg01048445	0.484879	0.130806	1.89218e-06	0.000131658	chr2	241772076	-	chr2:241771655-241772194	Island	GTCCCGCGGGGCGAGCTGAGCTAGGGTGAGCATCCTGTGGGGTAGACTATGGCGGCTGGG[CG]CGTGCGGCCTGTGCGGGGCCTCCCCGGCTGCGGTGAGAGCGGCTCGAGGGGTCCCGTGCC	CGCCCAGCCGCCATAGTCTACCCCACAGGATGCTCACCCTAGCTCAGCTC							TRUE	2:241420272-241420865	2:241770945-241772657	Unclassified							NA	TRUE
cg01051698	0.61204	0.746292	1.13972e-08	3.10436e-06	chr1	10053948	-	chr1:10057121-10058108	N_Shelf	TTACACTTTCTAGCTTAGCTGCGTCAAGTTTCAGATGCCTTTAAGATAGCCAAGTGGAGA[CG]TCAAGTAGGAGGCGAGAGGTGGCACTGAACGTGCAGGCAGGTTACCTGGGTTTGAATCCA	CGTCTCCACTTGGCTATCTTAAAGGCATCTGAAACTTGACGCAGCTAAGC							NA										NA	TRUE
cg01052291	0.262091	0.591897	2.84917e-07	3.19221e-05	chr6	133036573	+		OpenSea	TATCAAGGCTTGACTCCAGGAGGATTCACTTCCGAGCTCCAAGCTCCCTCATGTGGCTGA[CG]GCAGGGATCAAGACCTCATTGGTTGTTGCCCAGAGACATGAGTTCCTAGTGATGCAAACC	CGGCAGGGATCAAGACCTCATTGGTTGTTGCCCAGAGACATGAGTTCCTA	VNN1	NM_004666	TSS1500				NA				VNN1	ENST00000367928.4	TSS1500	VNN1	ENST00000367928.4	TSS1500	NA	TRUE
cg01059276	0.470812	0.6393	3.08835e-06	0.000190339	chr1	90448216	+		OpenSea	ACAAATCCTAAAATAAAGTGAAAGGGGAGGGTTAATGGTTAAAATGGGTAGAAAATGCCA[CG]GGCTAGAATACACAAGATAAAATGACAATTGGAAACTTGAGAGAAACAAAATTCTGAACA	CGGGCTAGAATACACAAGATAAAATGACAATTGGAAACTTGAGAGAAACA							NA										NA	NA
cg01059738	0.291446	0.636571	1.62863e-10	1.52372e-07	chr3	162003213	-		OpenSea	GCAGGAAACCATTTTGTTTGCTGTACAGAATTCCAGCAATCGCTGACTGTGCACTGGCAG[CG]TTGTGTGTGCTGGCATTGGCCTTCCCTCTTGGGTACAATGTTTTGAGCATTGCTGCCATT	CGCTGCCAGTGCACAGTCAGCGATTGCTGGAATTCTGTACAGCAAACAAA							NA										NA	NA
cg01059913	0.590953	0.263513	1.57538e-05	0.000667597	chr12	120033155	+	chr12:120031494-120033212	Island	GGAACTCCCCGGCCACAGACGCAGAGCCCTGATTCAGCGCTGTGAAAATCGCTAGCCACC[CG]TCCCCCATCAAGTCCGCCCACACTTGCCCACGGGTGGTGGCACCATATTCGATTCGTGGG	ATATGGTGCCACCACCCGTGGGCAAGTGTGGGCGGACTTGATGGGGGACG	TMEM233	NM_001136534	Body				NA	12:118515899-118517682			RP11-768F21.1;RP11-768F21.1;RP11-768F21.1;TMEM233	ENST00000535511.1;ENST00000509470.2;ENST00000537366.1;ENST00000453450.2	TSS1500;TSS1500;3'UTR;5'UTR	RP11-768F21.1;RP11-768F21.1;RP11-768F21.1;TMEM233	ENST00000535511.1;ENST00000509470.2;ENST00000537366.1;ENST00000453450.2	TSS1500;TSS1500;3'UTR;5'UTR	NA	TRUE
cg01064918	0.42008	0.118273	1.49758e-05	0.000642436	chr14	92788960	+	chr14:92788913-92789204	Island	ATGGAAAGCTCAACCGTCGGTTGTGGGGCCCGCAGATCTCTCTGGTTCCCCTCTCTGCCC[CG]TCTCCAGCTTTTTTGCAGGTCGGTGTCGCGGCCTCGCAGATCCCCAACAGCCCCGAGAGC	GTTGGGGATCTGCGAGGCCGCGACACCGACCTGCAAAAAAGCTGGAGACG	SLC24A4;SLC24A4;SLC24A4;SLC24A4	NM_153648;NM_153647;NM_153648;NM_153646	1stExon;TSS1500;5'UTR;TSS1500				NA	14:91858667-91860465			SLC24A4;SLC24A4;SLC24A4;SLC24A4;SLC24A4	ENST00000531433.1;ENST00000532405.1;ENST00000318079.5;ENST00000393265.2;ENST00000393265.2	TSS1500;TSS1500;TSS1500;1stExon;5'UTR	SLC24A4;SLC24A4;SLC24A4;SLC24A4;SLC24A4	ENST00000531433.1;ENST00000532405.1;ENST00000318079.5;ENST00000393265.2;ENST00000393265.2	TSS1500;TSS1500;TSS1500;1stExon;5'UTR	NA	TRUE
cg01065679	0.825733	0.623439	4.63955e-07	4.57197e-05	chr1	222245218	+		OpenSea	CGTCTCCTCTTCCAAGTTCTTAACAGAATTAGTTGATTAAGCACCATGTTACTCCCCTGA[CG]GAGGAGTATTTAAGCTGCCCTTGCAAGATGGCAGATGCACCAGCTCAATACAGAGGTGTG	CGGAGGAGTATTTAAGCTGCCCTTGCAAGATGGCAGATGCACCAGCTCAA							TRUE										NA	TRUE
cg01066056	0.566258	0.679015	6.47025e-06	0.000336403	chr1	53306535	+	chr1:53308294-53309262	N_Shore	TAAGGTCATAAACTGCTTCCTTGGCTTTTGAAAATTGTTTAACTTGCCTGTTTTCTAGCT[CG]GTAAGGCCTGGGACATATGCAGTTGGCCACACCTCTAGATATGCTGGAAATAGTCAAACC	CGGTAAGGCCTGGGACATATGCAGTTGGCCACACCTCTAGATATGCTGGA							NA										NA	TRUE
cg01070854	0.248352	0.100792	1.25106e-05	0.000558892	chr6	7542456	-	chr6:7541518-7543472	Island	GACTCGGGTCCCGAAGGTGGAAAGGTTTTTTTGCCCCAGGTCCCGAAAGAACTTCCCGGC[CG]CGCTGGGAGCAGGACCGGGTGTCCTGACGCGTGCGGGGACAGGTTGGCCCCTGTCCTGCG	CGGCCGGGAAGTTCTTTCGGGACCTGGGGCAAAAAAACCTTTCCACCTTC	DSP;DSP	NM_001008844;NM_004415	Body;Body				NA	6:7486490-7488508	6:7541406-7543104	Unclassified	RP3-512B11.3	ENST00000561592.1	TSS1500	RP3-512B11.3	ENST00000561592.1	TSS1500	NA	TRUE
cg01072550	0.659746	0.790204	8.68248e-08	1.34434e-05	chr1	21505969	-	chr1:21503115-21503836	S_Shelf	ATCAAAACCTGTTCCAAGGAAATTATTTGACTTCTCATTTACACTAGGGTGATAACAGGC[CG]ATAATTGCCTAATTGTTATTCTTTTCTGAGCTAGCTTCATTTTCTAACTTAATAATAGCT	CGGCCTGTTATCACCCTAGTGTAAATGAGAAGTCAAATAATTTCCTTGGA							NA										NA	TRUE
cg01074896	0.674359	0.785904	1.26728e-07	1.7803e-05	chr1	81960001	-		OpenSea	TCCATTCCATGTAAACTGAAACAAGATAATGTGTCCCATTTTTAAAATCTGGTCTATACT[CG]TCATTTTAAAAAGTATAATCTGGAGGCTCAGTCCCTTATCCTTCTTCTGAAGATGAACAG	CGAGTATAGACCAGATTTTAAAAATGGGACACATTATCTTGTTTCAGTTT							TRUE				LPHN2;LPHN2	ENST00000370725.1;ENST00000469377.1	5'UTR;5'UTR	LPHN2;LPHN2;LPHN2	ENST00000473719.1;ENST00000370721.1;ENST00000469377.1	5'UTR;5'UTR;5'UTR	NA	TRUE
cg01075539	0.631946	0.762444	1.73908e-06	0.0001235	chr7	81823516	-		OpenSea	TTCTACATGAGTTGGCATGAGCCAGTGACAGAGTGTGAATCATTCTCCCATCAGCTGCTC[CG]TAGGGCTGGGTTATCAATTATCATAAGCAACCTCCAGTTGGTAGTCAAGCTATGGCTCAA	CGGAGCAGCTGATGGGAGAATGATTCACACTCTGTCACTGGCTCATGCCA	CACNA2D1;CACNA2D1	NM_000722;NM_001302890	Body;Body				NA							CACNA2D1	ENST00000484706.1	3'UTR	NA	NA
cg01075872	0.271148	0.526198	1.55365e-07	2.05468e-05	chr1	241571632	-		OpenSea	TTCCCAAAAGATCACAAATAATGCTCAAAACAACACAAAGATAAGTTCACTCCATAGTTA[CG]TTTAGAGAAAGACAGATAAGGCCACCCTGTGACACAAACATGACTCAATATCCCCCTCTT	CGTAACTATGGAGTGAACTTATCTTTGTGTTGTTTTGAGCATTATTTGTG							NA										NA	NA
cg01076406	0.585847	0.778067	1.35511e-05	0.000595121	chrX	73439721	+		OpenSea	ATATAAAAGCCTTCACTTTTGGTTAATTACAAAAAAAAAAAAAAAAAAAAAAAAAAAAAC[CG]TGGGAGATATGTGACAGTGAGAGTAGGCCTGCTACTGATGAGAAGGACCAGCAACTTAGC	GTCCTTCTCATCAGTAGCAGGCCTACTCTCACTGTCACATATCTCCCACG	NCRNA00182;MIR374B;MIR421	NR_028379;NR_030620;NR_030398	Body;TSS1500;TSS1500				NA				MIR421;MIR374B	ENST00000365696.2;ENST00000390738.1	TSS1500;TSS1500	MIR421;MIR374B	ENST00000365696.2;ENST00000390738.1	TSS1500;TSS1500	NA	TRUE
cg01079019	0.494926	0.668343	2.53486e-08	5.50327e-06	chr16	21566602	+		OpenSea	CACTGTAAATTCCAAAATTAGACCTGCGCCGCGAAGACCGCCCACCAGCAAAATGCCAAG[CG]TATTTCTTTAAAAACTGGAAAGCCGTGTTTCGCTGCTCTTCCTGTAGACAATACAGCATG	TCTACAGGAAGAGCAGCGAAACACGGCTTTCCAGTTTTTAAAGAAATACG							NA	16:21474081-21474263	16:21565890-21566659	Unclassified							NA	TRUE
cg01079652	0.711704	0.812983	2.29694e-08	5.12628e-06	chr1	79118191	-		OpenSea	TGTGTAGTATTCCGTGTGGGAAATATCATTAGTCTATTTACCAGGACATAAAATTACCAG[CG]TATTTATTAGAAAATTAGACTCAGTCAGTTGTCTTCCTTTTTTCCCTGAGAGTGTTCCCT	CGCTGGTAATTTTATGTCCTGGTAAATAGACTAATGATATTTCCCACACG	IFI44	NM_006417	Body				NA		1:79118064-79118845	Unclassified_Cell_type_specific	IFI44;IFI44	ENST00000545124.1;ENST00000495254.1	5'UTR;5'UTR	IFI44;IFI44;IFI44;IFI44;IFI44	ENST00000470323.1;ENST00000545124.1;ENST00000495254.1;ENST00000467790.1;ENST00000472152.1	5'UTR;5'UTR;5'UTR;5'UTR;5'UTR	NA	TRUE
cg01081930	0.393853	0.530357	1.59456e-05	0.000673711	chr1	92284280	+		OpenSea	CAAGTGGGACCTTTTGTGTGTGTGTCTTGGAGGTGGGAGATTTAATGTAAACACAGACCA[CG]TTTGTGCTTTCTGTTATACACATCCTGCATCACCACACACTGAGCACACATGTGTTAAAA	TGTGCTCAGTGTGTGGTGATGCAGGATGTGTATAACAGAAAGCACAAACG	TGFBR3	NM_003243	Body				TRUE										NA	TRUE
cg01083620	0.345734	0.720758	5.23877e-10	3.46752e-07	chr3	195601109	-	chr3:195600845-195602361	Island	TCAGAGGCGCTCAGTAACTGGGTGAGAATGCCGCTGAGGCCGAGACCTTGCTCAGAGCAG[CG]TGACTCGTGCCCAAGGCAGGTCACTCCGTCTGGCCTCTCCCTTCCGCCAACACTGCCCAG	CGCTGCTCTGAGCAAGGTCTCGGCCTCAGCGGCATTCTCACCCAGTTACT	TNK2;TNK2;TNK2	NM_005781;NM_001308046;NM_001010938	Body;Body;Body				NA	3:197085243-197085553	3:195601053-195601193	Unclassified_Cell_type_specific				TNK2;TNK2;TNK2;TNK2;TNK2;TNK2	ENST00000478623.1;ENST00000489628.1;ENST00000468680.1;ENST00000464041.1;ENST00000481865.1;ENST00000486523.1	3'UTR;3'UTR;TSS1500;3'UTR;3'UTR;3'UTR	NA	NA
cg01083686	0.548129	0.666725	1.14016e-06	9.01931e-05	chr1	21299567	-		OpenSea	TCTCTTGGCTGGAGGCGGCTGTTGCTGCGTAGGCACTATGATAGGTGCTGACTGATACAC[CG]GCTGACTTGGGTAAAAAGGCGTTCCTAAAAAGTTGGAAAAAATTAAATAGGCATTCAGTT	AGGCGGCTGTTGCTGCGTAGGCACTATGATAGGTGCTGACTGATACACCG	EIF4G3;EIF4G3;EIF4G3;EIF4G3	NM_001198803;NM_001198802;NM_003760;NM_001198801	Body;Body;Body;Body				NA				EIF4G3	ENST00000536266.1	TSS200	EIF4G3;EIF4G3	ENST00000536266.1;ENST00000476088.1	TSS200;3'UTR	NA	NA
cg01090433	0.498576	0.763107	4.38898e-08	8.22995e-06	chr16	82673506	+		OpenSea	TGTTCTGGTGGACAGACACTCTCTCCCTTGACAGGGTCCTCACCACTGTGTGCACCGTCC[CG]CCACCTGGTGGCCGTGCCTATCTGTGCATTCCCTATTTGGTTAACTCATTCACTTAACAA	TGAGTTAACCAAATAGGGAATGCACAGATAGGCACGGCCACCAGGTGGCG	CDH13	NM_001257	Body				TRUE		16:82672707-82673924	Unclassified				CDH13;CDH13	ENST00000569455.1;ENST00000566333.1	5'UTR;5'UTR	NA	TRUE
cg01091774	0.448542	0.709856	9.72746e-06	0.00045949	chr17	74555728	+	chr17:74554140-74554361	S_Shore	CTTTTGCCCAAAGTTATACAAGCAGTTACTGAGTTAGACTGGCAGTTCTGAACTGGGGAG[CG]ATGGTGTTCCTGGCATCTGGTGAATGCTACTATTAATAAATACCCTGGCTGGGCCTGGAT	CCAGGGTATTTATTAATAGTAGCATTCACCAGATGCCAGGAACACCATCG	SNHG16;SNHG16;SNHG16;SNHG16;SNORD1B	NR_038111;NR_038110;NR_038109;NR_038108;NR_004396	Body;Body;Body;Body;TSS1500				NA				AC090699.1;SNORD1B	ENST00000493536.1;ENST00000363091.1	5'UTR;TSS1500	AC090699.1;SNORD1B	ENST00000493536.1;ENST00000363091.1	5'UTR;TSS1500	NA	NA
cg01092748	0.61698	0.738612	1.02015e-07	1.52441e-05	chr1	21437835	-		OpenSea	ACAAAAATTTGAATCCTAGATTCGTTTGCCAGCTAGATTACCTTGGGAAAATGATGTGAT[CG]CTCCAAACTTCAGTTTCCTCATCAATACTCTGTGGGATTGCTGGAAAGAATTAGCAAAAT	ATCCTAGATTCGTTTGCCAGCTAGATTACCTTGGGAAAATGATGTGATCG	EIF4G3;EIF4G3;EIF4G3;EIF4G3;EIF4G3	NM_003760;NM_003760;NM_001198803;NM_001198802;NM_001198801	1stExon;5'UTR;5'UTR;5'UTR;5'UTR				NA				EIF4G3;EIF4G3;EIF4G3	ENST00000463775.1;ENST00000463775.1;ENST00000400422.1	1stExon;3'UTR;5'UTR	EIF4G3;EIF4G3;EIF4G3;EIF4G3;EIF4G3	ENST00000463775.1;ENST00000463775.1;ENST00000400422.1;ENST00000411888.1;ENST00000438975.1	1stExon;3'UTR;5'UTR;5'UTR;5'UTR	NA	NA
cg01094564	0.458849	0.242305	1.34607e-05	0.000592049	chr11	3663198	-	chr11:3663052-3663802	Island	CAGAGGTGCTGGAGTCCTGGTTTCGAGGGGCTGGAGGCAGATCTGGACCCTGTCTCCAGG[CG]CACGGGATCCCGGGTCCAGGATTAGGGCCCCGGCGGGGCGTGGGCGGGGCCTGGGAGTTT	CGCCTGGAGACAGGGTCCAGATCTGCCTCCAGCCCCTCGAAACCAGGACT	ART5;ART5;ART5	NM_053017;NM_001079536;NM_053017	1stExon;5'UTR;5'UTR				TRUE	11:3619737-3620378	11:3662701-3664363	Unclassified_Cell_type_specific	ART5;ART5;ART5;ART5;ART5	ENST00000397067.3;ENST00000397068.3;ENST00000397067.3;ENST00000397068.3;ENST00000359918.4	1stExon;1stExon;5'UTR;5'UTR;5'UTR	ART5;ART5;ART5;ART5;ART5	ENST00000397067.3;ENST00000397068.3;ENST00000397067.3;ENST00000397068.3;ENST00000359918.4	1stExon;1stExon;5'UTR;5'UTR;5'UTR	NA	TRUE
cg01097384	0.733939	0.556631	1.84075e-05	0.000753672	chr11	1358675	+	chr11:1357626-1359081	Island	TCGGAAGCCACCCCCAGCTCCCCCGGCAGCTTGGAGCCTCAGAAACGCGGGGCAGAGACG[CG]ACACGGAGCCGCCTGGCACTGAGACTCCCCAGTGGCTGCGCCGCCTTCCCGGGGGCCCGA	GAAGGCGGCGCAGCCACTGGGGAGTCTCAGTGCCAGGCGGCTCCGTGTCG							NA	11:1313827-1315633									NA	TRUE
cg01097709	0.665308	0.769836	3.51654e-07	3.73032e-05	chr1	95193022	+		OpenSea	TCAGCCAAGCTGGAAGCATCTATACTACAGAAACTGCAAGCACTCTAACACAGGGTGGAA[CG]GGTGGGCCCATTGTGAAACATTTGCCAGCATATCACTGCATGTAATGACCACCACCCTGC	CGGGTGGGCCCATTGTGAAACATTTGCCAGCATATCACTGCATGTAATGA	LINC01057	NR_104131	Body				NA				RP11-86H7.1	ENST00000452922.1	3'UTR	RP11-86H7.1;RP11-86H7.1;RP11-86H7.1;RP11-86H7.1;RP11-86H7.1;RP11-86H7.1	ENST00000418366.1;ENST00000442418.1;ENST00000452922.1;ENST00000432162.1;ENST00000421997.1;ENST00000414374.1	3'UTR;3'UTR;3'UTR;3'UTR;3'UTR;3'UTR	NA	NA
cg01100912	0.613993	0.359044	2.84836e-06	0.000179444	chr5	107005390	+	chr5:107005130-107008191	Island	GTCTCCCGCATACCCGGCGGGCTTCGGGACGCCTACAAATCGGTTCCAGGTAATCGCGCG[CG]TTCCTCCGGCAGCACATCGCCAGGCCGCGGGCGAAGGGCTCCCACCTCCTGGCTCGGCCA	GAGGTGGGAGCCCTTCGCCCGCGGCCTGGCGATGTGCTGCCGGAGGAACG	EFNA5	NM_001962	Body				NA	5:107032791-107033599						EFNA5	ENST00000504941.1	3'UTR	NA	TRUE
cg01104047	0.40033	0.18195	5.73835e-06	0.000306681	chr5	136834155	-	chr5:136834016-136835146	Island	GTACTGGGAGACGGTGCTCAGCCACTGGTCATTGTCTAGGAAATTGCCGTGGTTGGGGCC[CG]CGCCTCCGGCGAGCGCGTCCAGGTGCCGGCTCTCGACTTGGAGGAAGCACCACGCCGCGG	CGGGCCCCAACCACGGCAATTTCCTAGACAATGACCAGTGGCTGAGCACC	SPOCK1	NM_004598	Body				NA	5:136861745-136863040			SPOCK1	ENST00000282223.7	1stExon	SPOCK1;SPOCK1;SPOCK1;SPOCK1	ENST00000282223.7;ENST00000505690.1;ENST00000510689.1;ENST00000503916.1	1stExon;1stExon;5'UTR;3'UTR	NA	TRUE
cg01104334	0.619196	0.755177	3.16159e-06	0.00019386	chr1	92682514	+	chr1:92683438-92683682	N_Shore	ATGAGGAATAAGTTCTGGAGATTTGAAGAGAGGAGGAATTGTCTTAGTCCATTATGGCCA[CG]ATAACAAAATACCTTAGACCAGGTAATTTATAAACAAGAGGCCAGGTGTGGTGGCTTAAC	CACCTGGCCTCTTGTTTATAAATTACCTGGTCTAAGGTATTTTGTTATCG	C1orf146	NM_001012425	TSS1500				NA				C1orf146	ENST00000370375.3	TSS1500	C1orf146	ENST00000370375.3	TSS1500	NA	TRUE
cg01108283	0.45727	0.636934	4.41525e-07	4.40262e-05	chr9	77073969	-		OpenSea	TCAATCACAGGCAGCCAACTAATCAGACTGTGCCTAAATAAGACAAATGCCTCATCACAG[CG]TGCCTAAGAAGCAAATGCTTAGCTAGTCCATCAGGTGATTTCTCTACTTTGCTTCCCTGC	CGCTGTGATGAGGCATTTGTCTTATTTAGGCACAGTCTGATTAGTTGGCT	MIR6130	NR_106746	Body				NA										NA	NA
cg01109734	0.343294	0.739257	1.68179e-06	0.00012033	chr2	795156	+		OpenSea	ATTTTTCACAGCAGGAGGCATTTTATTTGGGTTGATTCCATGTCGTTCAAGAACATCCTG[CG]CTCTGGTTTTCGCAGCTAGAAGAAAAGGAAACACAGCAAGCAAATAGCTCTTTTCCACAG	GCTATTTGCTTGCTGTGTTTCCTTTTCTTCTAGCTGCGAAAACCAGAGCG						RDMR	NA	2:785156-785274			AC113607.1;AC113607.1	ENST00000414556.1;ENST00000415700.1	3'UTR;3'UTR	AC113607.1;AC113607.1	ENST00000414556.1;ENST00000415700.1	3'UTR;3'UTR	NA	TRUE
cg01111041	0.123835	0.311601	1.86842e-07	2.35701e-05	chr6	32121055	+	chr6:32121829-32122529	N_Shore	TGACCTTGTAAACAGAGAGAGGGGCTCAGACATGCTGAGAAATCCTTATCTCTAGAGAAA[CG]TCTTTAAATGCTAAGTAAAAGCCCTAGCAAGTAAAAGCCCTGAGGCACTAGGGTGTCGGT	CGTCTTTAAATGCTAAGTAAAAGCCCTAGCAAGTAAAAGCCCTGAGGCAC	PPT2;PRRT1;PPT2	NM_005155;NM_030651;NM_138717	TSS1500;TSS1500;TSS1500				TRUE		6:32120376-32123743	Promoter_Associated	PPT2;PPT2;PRRT1;PRRT1;PPT2;PPT2;PPT2;PPT2;PPT2;XXbac-BPG300A18.12;PRRT1	ENST00000361568.2;ENST00000395523.1;ENST00000211413.5;ENST00000375152.2;ENST00000324816.6;ENST00000437001.2;ENST00000375137.2;ENST00000375143.2;ENST00000493548.1;ENST00000422437.1;ENST00000375150.2	TSS1500;TSS1500;TSS1500;TSS1500;TSS1500;TSS1500;TSS1500;TSS1500;TSS1500;TSS1500;TSS200	PRRT1;PPT2;PPT2;PPT2;PRRT1;PRRT1;PRRT1;PRRT1;PRRT1;PPT2;PPT2;PPT2;PPT2;PPT2;PPT2;XXbac-BPG300A18.12;PRRT1;PRRT1;PRRT1;PPT2;PPT2;PRRT1;PPT2	ENST00000486917.1;ENST00000361568.2;ENST00000478521.1;ENST00000395523.1;ENST00000428778.1;ENST00000495191.1;ENST00000472641.1;ENST00000211413.5;ENST00000375152.2;ENST00000324816.6;ENST00000437001.2;ENST00000375137.2;ENST00000375143.2;ENST00000424499.1;ENST00000493548.1;ENST00000422437.1;ENST00000497552.1;ENST00000485392.1;ENST00000498575.1;ENST00000436118.1;ENST00000453656.1;ENST00000375150.2;ENS…	3'UTR;TSS1500;TSS1500;TSS1500;5'UTR;TSS1500;TSS1500;TSS1500;TSS1500;TSS1500;TSS1500;TSS1500;TSS1500;TSS1500;TSS1500;TSS1500;3'UTR;3'UTR;3'UTR;TSS1500;TSS1500;TSS200;TSS200	NA	TRUE
cg01111179	0.478442	0.756982	6.85676e-06	0.000351723	chr2	169757561	-		OpenSea	GTCTGACCTTGGAGGAAATGAACTGTACAAAAAATTTCAAGCAAACATGATCCAACTGTT[CG]CACAAAAGGGAGGTTGCATAAGAAATTCATTGTGTTTCTATCCAAATTTCCCCCTCGAAT	AGGAAATGAACTGTACAAAAAATTTCAAGCAAACATGATCCAACTGTTCG	G6PC2;G6PC2	NM_021176;NM_001081686	TSS200;TSS200				NA				G6PC2;G6PC2;G6PC2;SPC25	ENST00000429379.2;ENST00000421979.1;ENST00000375363.3;ENST00000472216.2	TSS1500;TSS1500;TSS200;3'UTR	G6PC2;G6PC2;G6PC2;G6PC2;SPC25;SPC25	ENST00000429379.2;ENST00000282075.4;ENST00000421979.1;ENST00000375363.3;ENST00000451987.1;ENST00000472216.2	TSS1500;TSS1500;TSS1500;TSS200;5'UTR;3'UTR	NA	TRUE
cg01112390	0.575666	0.0458702	5.14547e-07	4.92671e-05	chr9	123836942	-	chr9:123836702-123837585	Island	CCTCAGGCCGTCCTCGGACACAGGCCCTGAGAAGCGTGTCCGTGTTTCAGAGGGTGGCGG[CG]GCAGCTTTGTCTCAGCGAAGGCCACAGCACTGCGGGCAGCTGCCGCATGAAACCTCGGCT	CGCCGCCACCCTCTGAAACACGGACACGCTTCTCAGGGCCTGTGTCCGAG							NA	9:122876524-122877595	9:123836350-123838142	Promoter_Associated	CNTRL;CNTRL	ENST00000373855.1;ENST00000373865.1	TSS1500;TSS200	CNTRL;CNTRL	ENST00000373855.1;ENST00000373865.1	TSS1500;TSS200	NA	NA
cg01113900	0.414264	0.644341	9.69548e-06	0.000458386	chr3	69925279	+		OpenSea	TTTTTTTTTCAGACAGGATATTTCAGAAAATGCTTTGAATGATATTGTTGTCGACTTTCA[CG]TATGAAGACTTAGTGCAGTTGATAACTAGAAATTTTAATTTAAGATGTCTTAAGAATGCT	ACATCTTAAATTAAAATTTCTAGTTATCAACTGCACTAAGTCTTCATACG	MITF;MITF;MITF	NM_198177;NM_198159;NM_006722	Body;Body;Body				NA				MITF	ENST00000472437.1	5'UTR	MITF;MITF;MITF;MITF	ENST00000495741.1;ENST00000429090.1;ENST00000433517.1;ENST00000472437.1	5'UTR;5'UTR;5'UTR;5'UTR	NA	TRUE
cg01115990	0.587719	0.229305	9.24884e-06	0.000442582	chr16	2770901	-	chr16:2771081-2771365	N_Shore	CCGATGGAACACAGTGGGGCTGGGCCGCGCTGGTGGGAAAGTCAAGGCCAGGGGTGTTTG[CG]GGGCCGAGGGCAGGGGAGGCGATGGGACATGGGGCGGGGTCCGGAGTTGGCCGCAGCGAC	AGTGGGGCTGGGCCGCGCTGGTGGGAAAGTCAAGGCCAGGGGTGTTTGCG	PRSS27	NM_031948	TSS1500				NA	16:2710867-2711512	16:2770716-2771819	Promoter_Associated	PRSS27	ENST00000302641.3	TSS1500	PRSS27;PRSS27	ENST00000302641.3;ENST00000565903.1	TSS1500;TSS1500	NA	TRUE
cg01117364	0.478552	0.30222	1.37202e-05	0.000600195	chr10	135132509	-	chr10:135132006-135132458	S_Shore	AGAGTCGGCGGTTGTGGTGGTCCTGGCCCAGCATCCAGGCCTCGCATTGCCAGGGGCAGG[CG]GCTGGGAGCCTGTGGGAGGAGGTGTGGGAGCAGGGCAGGGGTCCCCAGAGATCCTCCCGG	CGCCTGCCCCTGGCAATGCGAGGCCTGGATGCTGGGCCAGGACCACCACA							NA	10:134982081-134983186	10:135131950-135132803	Unclassified_Cell_type_specific							NA	TRUE
cg01119439	0.636941	0.833869	9.79859e-06	0.000462069	chr21	47240900	-		OpenSea	GGACAGAGCCTCAGACTCTGAAGGCCACAGCAGTGATAGCACACCTGTGTCTGAGGAGTG[CG]TTCTGAGAGGAGACCCGGCCCCTCGTCCTTGTCCATCCATGTGGCTTCTGCAAAGCACCC	CGCACTCCTCAGACACAGGTGTGCTATCACTGCTGTGGCCTTCAGAGTCT							NA		21:47239058-47241067	Unclassified	PCBP3	ENST00000400314.1	5'UTR	PCBP3	ENST00000400314.1	5'UTR	NA	NA
cg01120509	0.362445	0.593198	5.77386e-07	5.37043e-05	chr16	698230	-	chr16:698826-700244	N_Shore	AGAATCACCAGCTGTTCCTAGTGGCTGCTGGGAGGGGGCGCTGCTACACGGCCGACCTGT[CG]CCAGGAGAGAAGCATGGCGCCCTGCCCACCCACTGCGCCTGGCTGGGTGCCGGCCACACC	TGTTCCTAGTGGCTGCTGGGAGGGGGCGCTGCTACACGGCCGACCTGTCG	WDR90;FAM195A	NM_145294;NM_138418	TSS1500;3'UTR				NA		16:697796-700214	Promoter_Associated	WDR90;WDR90;FAM195A;MSLN	ENST00000549091.1;ENST00000293879.4;ENST00000307650.4;ENST00000446427.2	TSS1500;TSS1500;3'UTR;5'UTR	FAM195A;FAM195A;WDR90;WDR90;FAM195A;WDR90;WDR90;FAM195A;MSLN	ENST00000491999.1;ENST00000575894.1;ENST00000552943.1;ENST00000549091.1;ENST00000474840.1;ENST00000549648.1;ENST00000293879.4;ENST00000307650.4;ENST00000446427.2	3'UTR;5'UTR;TSS1500;TSS1500;3'UTR;TSS1500;TSS1500;3'UTR;5'UTR	NA	TRUE
cg01121199	0.395758	0.738448	1.60185e-05	0.000675849	chr18	44626682	+		OpenSea	CAGGAGACTGAGGGCTACTCAGGCTCAGATATTAAGCTCGTCTGCAGGGAAGCAGCCATG[CG]GCCCGTGAGGAAGATCTTTGATGCACTTGAAAATCACCAGTCAGGTATGGGTTGGATCAC	CGGCCCGTGAGGAAGATCTTTGATGCACTTGAAAATCACCAGTCAGGTAT	KATNAL2	NM_031303	Body				NA		18:44626564-44627086	Unclassified_Cell_type_specific							NA	NA
cg01123926	0.0632207	0.364207	4.83505e-06	0.000268713	chr3	58626656	+		OpenSea	GGCTGTCCAGGTGGCGCGAGCAGGCTCGCTTAGCAGCCCCTCCAGGATTCTCGGGAGCCA[CG]TAGCGTGAACGGAATGCTTCACCTGGGGCTCTTGGAAGGAGTCTATGAACCCATGGGGCT	TCATAGACTCCTTCCAAGAGCCCCAGGTGAAGCATTCCGTTCACGCTACG	FAM3D	NM_138805	Body				NA	3:58601474-58601708	3:58625669-58626970	Unclassified				FAM3D	ENST00000482623.1	3'UTR	NA	TRUE
cg01125058	0.114903	0.413369	5.10199e-07	4.90053e-05	chr8	81595314	+		OpenSea	TGGGGTCTTGTGGAATTGATGGTTAACTCTTTGGCCTTCCATAGAATTCATTTTCTCCCA[CG]AACTCCCCGAATGGCTGTATTTAGGGTCACTGCATCACCTTGTGGTCATGACGGAAATTG	TGACCACAAGGTGATGCAGTGACCCTAAATACAGCCATTCGGGGAGTTCG	ZNF704	NM_001033723	Body				NA		8:81594480-81596004	Unclassified	ZNF704	ENST00000520336.1	3'UTR	ZNF704	ENST00000520336.1	3'UTR	NA	NA
cg01130655	0.526144	0.116371	2.37318e-06	0.000156219	chr9	132359879	-	chr9:132359672-132360061	Island	CGGGCGAGCTGGGAGGGAGGCGGGTTTCGGTGGATTCCCCTTTCATCCCGCGGCTGCAGC[CG]GGCGCAGACCTCGGGGAGGCCCGGCGCGTCCCCGCTGGGCAAGTCCCTGCAGGGCAGCGA	GAGGGAGGCGGGTTTCGGTGGATTCCCCTTTCATCCCGCGGCTGCAGCCG					chr9:132359774-132359774		TRUE	9:131399297-131399882	9:132359706-132360881	Unclassified_Cell_type_specific							NA	NA
cg01131297	0.692503	0.390813	1.96541e-06	0.000135545	chr9	19925171	-		OpenSea	AGAATAACTGGTGACCCCACAGACCTGCACAGATGTGCTGTAGAACAAACAAACATCAGA[CG]TTCTCTATAAGGACAGGTCTAGGCTGCACCTTTATCTATATCCAGTCAAAGATATATAGA	CGTCTGATGTTTGTTTGTTCTACAGCACATCTGTGCAGGTCTGTGGGGTC							NA				RP11-378I6.1	ENST00000568063.1	TSS1500	RP11-378I6.1	ENST00000568063.1	TSS1500	NA	NA
cg01140877	0.537552	0.769286	1.46942e-07	1.9741e-05	chr9	124959765	-		OpenSea	GCTGCAGGTTTAATTCCATTTTAAATATTGATGAAATGTGCTTCGGCAACCTCACCCTGG[CG]TGGCAGGGCCAGGGGAGCCGCAGAGAGGCGCAGGGGAGGCGGAGGGAGGGGTTGGTGAGC	CGCCAGGGTGAGGTTGCCGAAGCACATTTCATCAATATTTAAAATGGAAT	MORN5;MORN5	NM_198469;NM_001286828	Body;3'UTR				NA				MORN5	ENST00000486801.1	5'UTR	MORN5	ENST00000486801.1	5'UTR	NA	NA
cg01141459	0.841443	0.250059	1.22642e-13	6.98695e-10	chr22	30476452	-	chr22:30476012-30476530	Island	GCCTCGTTGACTATTCATGAGCCGAGGAGCGGGTTTGGGCCGGAAAAGGCCGTTGACCCC[CG]GTGGGAGGGAAGCGTCGACGAGCTGAGGTGAGGGCTGTTGAGACGCGAGGTCTCGGCCCA	CGGGGGTCAACGGCCTTTTCCGGCCCAAACCCGCTCCTCGGCTCATGAAT	HORMAD2;HORMAD2	NM_152510;NM_152510	1stExon;5'UTR				NA	22:28806013-28806530			HORMAD2;HORMAD2;HORMAD2;CTA-85E5.10	ENST00000403975.1;ENST00000336726.6;ENST00000336726.6;ENST00000429350.1	TSS1500;1stExon;5'UTR;TSS1500	HORMAD2;CTA-85E5.10;HORMAD2;HORMAD2;HORMAD2;CTA-85E5.10;CTA-85E5.10;CTA-85E5.10;MTMR3	ENST00000403975.1;ENST00000453743.2;ENST00000336726.6;ENST00000336726.6;ENST00000450612.1;ENST00000429350.1;ENST00000432568.1;ENST00000453743.2;ENST00000464734.1	TSS1500;1stExon;1stExon;5'UTR;TSS200;TSS1500;TSS200;3'UTR;5'UTR	NA	TRUE
cg01143607	0.714772	0.826824	6.05602e-07	5.57598e-05	chr1	40026447	-		OpenSea	AAGAAAGAATAAACTATCACTGGAACCAATTCACATCCTAAAGTTACTTCCAGTGAAAAC[CG]GAATTCATAGAGTAAAACTGTGGTCAGAGACAGAGGCAGTTTTATGGAGATTTTTTTTCT	CGGTTTTCACTGGAAGTAACTTTAGGATGTGAATTGGTTCCAGTGATAGT	LOC728448	NR_003929	TSS1500				NA										NA	TRUE
cg01143862	0.596078	0.480606	3.40706e-06	0.00020534	chr16	34510373	+		OpenSea	TAAATCCCCAGCTCAGATCGAGCTACGCCCGATGCTGCCCTAAGCCTTATGAGGTCACCA[CG]GAACTGCAGGTGAGGGCCCACTCGAACTCCATAGCTTTTACCATACAGCTACAAACTGGA	CGGAACTGCAGGTGAGGGCCCACTCGAACTCCATAGCTTTTACCATACAG							NA				AC007353.1;RP11-488I20.8	ENST00000408605.1;ENST00000562572.1	TSS1500;5'UTR	AC007353.1;RP11-488I20.8	ENST00000408605.1;ENST00000562572.1	TSS1500;5'UTR	NA	NA
cg01144779	0.298912	0.574002	4.18337e-09	1.5674e-06	chr18	58216431	+		OpenSea	AAAAAAAAAAAAAAAGAGGGGAGATTTGAATGTGTTGATCAAAGGGTACAAAATTTCAGA[CG]GGAGGAATAAATTCAAAAGTCCTGTTGTACAACATGGTGACTGTAGCAATAATAACATAT	CGGGAGGAATAAATTCAAAAGTCCTGTTGTACAACATGGTGACTGTAGCA							NA										NA	NA
cg01145430	0.562311	0.0292319	9.40717e-08	1.43393e-05	chr15	45670526	-	chr15:45669970-45671029	Island	GGCTAGGGAAAGCGAGGGAAGGTGGCGGCTCCGGGCAGGGAGCGAGCGAGTGCTCCACGC[CG]CCCGCAGGATCGAGTGAGTCACGCGGCCGCCAGACGAGGCCGGTGGCGCACGCACCCGAG	CGAGGGAAGGTGGCGGCTCCGGGCAGGGAGCGAGCGAGTGCTCCACGCCG	GATM;LOC145663	NM_001482;NR_033252	Body;TSS1500			DMR	NA	15:43457304-43458294	15:45669693-45671628	Unclassified	GATM	ENST00000560538.1	3'UTR	GATM;GATM;GATM;GATM;GATM;GATM	ENST00000558362.1;ENST00000559885.1;ENST00000558537.1;ENST00000558362.1;ENST00000561148.1;ENST00000560538.1	1stExon;TSS1500;TSS1500;3'UTR;5'UTR;3'UTR	NA	TRUE
cg01145661	0.273766	0.44233	2.41205e-05	0.00092938	chr4	22964186	-		OpenSea	TAGACTTTTTTTCTGCTTGATAGCCTTCTCTTTTTCTCAGTGAACGTTGTAAACTAGATC[CG]TAGTCGAGGGATTTTACTGGATTCACCAGCAGAGGGAGTTCAAACCAAGTTGTGTAAAAT	CGGATCTAGTTTACAACGTTCACTGAGAAAAAGAGAAGGCTATCAAGCAG							NA										NA	NA
cg01147538	0.47356	0.697329	1.70663e-06	0.000121711	chr1	51171852	-		OpenSea	AATGCTTTGTATACTTAAGAATTTTCTACAAGTCATAGGCTAATTCATAATATCTGCATA[CG]TATCTCCTCCAACAAAGCTGTCAATTATATCAACTCCAAATATGCTACTAAAATGTATAT	CGTATGCAGATATTATGAATTAGCCTATGACTTGTAGAAAATTCTTAAGT	FAF1	NM_007051	Body				NA							FAF1;FAF1	ENST00000494400.1;ENST00000487898.1	TSS200;3'UTR	NA	NA
cg01156130	0.418657	0.675428	4.30842e-06	0.000246465	chr14	63601715	+		OpenSea	CTGCTGTACTGAACTTTCAAGGCCAATCCAAGTCTAGATATAAAGAAAACCAAGTAGCTA[CG]AGTACCCCTGGTGACTAAATTGGGGATAACAGAGCAGTGGGAAGGACAAGGGAGAATGAA	CGAGTACCCCTGGTGACTAAATTGGGGATAACAGAGCAGTGGGAAGGACA							NA										NA	NA
cg01158469	0.599807	0.822015	3.40167e-07	3.63862e-05	chr16	69832831	-		OpenSea	GGGAAAGAGAGAGGGTGCTCCGAGGGGGTTGTGGGAGGTACAGATTCCCTGTGGCACCTC[CG]ACTTTTTCTACCTATGGTACCCAAGGTGACTCTTTTTAGGTGTTCCTACACCATTGAGCT	CGGAGGTGCCACAGGGAATCTGTACCTCCCACAACCCCCTCGGAGCACCC	WWP2;WWP2	NM_199423;NM_007014	Body;Body				TRUE		16:69832118-69833851	Gene_Associated_Cell_type_specific	WWP2;WWP2;WWP2	ENST00000544162.1;ENST00000545099.1;ENST00000544162.1	1stExon;5'UTR;5'UTR	WWP2;WWP2;WWP2;WWP2;WWP2	ENST00000567986.1;ENST00000544162.1;ENST00000569658.1;ENST00000545099.1;ENST00000544162.1	TSS200;1stExon;5'UTR;5'UTR;5'UTR	NA	TRUE
cg01160394	0.463174	0.148349	5.3105e-08	9.42811e-06	chr14	69951720	+	chr14:69950459-69951916	Island	GGGCACAGCCCCGCTGAGGCAGGATGTTCACGTCCAAGTCCAACTCGGTGTCGCCCTCGC[CG]TCCCTGGAGCAGGCTGACTCGGACGCCCTGGATATCAGCACCAAAGTGCAGCTCTACGGC	CACTTTGGTGCTGATATCCAGGGCGTCCGAGTCAGCCTGCTCCAGGGACG	FLJ44817	NM_001161498	1stExon				NA	14:69020213-69021698			PLEKHD1	ENST00000322564.7	1stExon	PLEKHD1;PLEKHD1;PLEKHD1	ENST00000556123.1;ENST00000322564.7;ENST00000556123.1	1stExon;1stExon;5'UTR	NA	TRUE
cg01160557	0.819642	0.595053	1.03324e-05	0.000481505	chr20	44651777	+	chr20:44651066-44651369	S_Shore	TCGCCCCGAAGCAAACCCAAGCGCCGAAACCCCTAGAGTAACCCTTAGGGGGTTATCTGG[CG]GACCTCCTCATTGTACAGATGACCAAATTGAGGCCTGGAATTCCGAATGGCCCCAGTCCC	ATTCGGAATTCCAGGCCTCAATTTGGTCATCTGTACAATGAGGAGGTCCG	SLC12A5	NM_001134771	Body				NA		20:44649960-44652687	Unclassified	RP11-465L10.7;RP11-465L10.10;RP11-465L10.10	ENST00000413737.1;ENST00000419897.1;ENST00000535913.1	5'UTR;TSS1500;TSS1500	RP11-465L10.7;RP11-465L10.7;RP11-465L10.10;RP11-465L10.10	ENST00000428198.1;ENST00000413737.1;ENST00000419897.1;ENST00000535913.1	5'UTR;5'UTR;TSS1500;TSS1500	NA	TRUE
cg01160877	0.423051	0.54953	1.37183e-06	0.000103662	chr1	47689941	+	chr1:47690980-47691727	N_Shore	TGGTCCCTTCACACTTGAGCTGGGAATAGGCACACACAGACACACACACACACATACACA[CG]GAATGCCCTCACTCTGTCTGTCATAAAACAAGCAAAGGGAGGAAAAGACACCTAACCACA	CGGAATGCCCTCACTCTGTCTGTCATAAAACAAGCAAAGGGAGGAAAAGA	TAL1;TAL1;TAL1;TAL1;TAL1;TAL1	NM_001287347;NM_001290405;NM_001290404;NM_001290403;NM_003189;NM_001290406	Body;Body;Body;Body;Body;5'UTR				NA				TAL1	ENST00000459729.1	TSS200	TAL1;TAL1	ENST00000459729.1;ENST00000464796.1	TSS200;3'UTR	NA	NA
cg01167615	0.498725	0.853044	1.41781e-08	3.62154e-06	chr2	174496001	+		OpenSea	ATTTTTCTTTAGCTGAGCCATAAAGCCTGAAGTTGGAAAGGAGATTCGTGGGAGAGTAGA[CG]CCACTGAGCAAACACCAGCTGGGGACAGCAGGATCCTGAAACGAGCTTGCTGCAGTTCCT	CGCCACTGAGCAAACACCAGCTGGGGACAGCAGGATCCTGAAACGAGCTT							TRUE										NA	TRUE
cg01172694	0.536852	0.703218	9.90525e-06	0.000465784	chr1	49817598	-		OpenSea	GGCCACTATGGTACATTTCATATCTGATATTCTAAGCCATGATGAATCAGCCTAAGCCAT[CG]TGAGTCATGCCCAAATTCCTGCAAAGAGTATTTGTGTTTTTTCATTAAAAGGATTCCTCT	ACATTTCATATCTGATATTCTAAGCCATGATGAATCAGCCTAAGCCATCG	AGBL4	NM_032785	Body				NA										NA	NA
cg01176826	0.358886	0.255274	1.2084e-05	0.000543447	chr6	29720527	-	chr6:29720381-29721101	Island	TGAGATCACCCGTTACCCCGCCCTGGTCTACAAGTGTTTGCTGATATAGAAACGGAATAA[CG]GCGCTGTGGGCTGGGGAGGACGGAGTTGCCTTCAGGCTTCTGGTCTCCAGCCGCGGGGCA	TTACCCCGCCCTGGTCTACAAGTGTTTGCTGATATAGAAACGGAATAACG							NA	6:29828319-29829051	6:29719772-29721481	Promoter_Associated							NA	TRUE
cg01178121	0.200454	0.0257216	4.02092e-07	4.11154e-05	chr7	20826569	-	chr7:20823307-20825662	S_Shore	CAGTTCCGCCCATTCCACCACAATTGTAGCTCCCTCTCCGGCTTTGAAGTGCCGCGGAGG[CG]CGGCCAGCCAATCTGCGGCCTCGCCGGGCCGCGCGGCGCGCGCGCCGTGAGGTCATCGGC	TTCCACCACAATTGTAGCTCCCTCTCCGGCTTTGAAGTGCCGCGGAGGCG	SP8;SP8	NM_182700;NM_198956	TSS200;TSS200				NA	7:20793072-20793643	7:20825230-20826620	Unclassified_Cell_type_specific	SP8	ENST00000297210.7	TSS200	SP8	ENST00000297210.7	TSS200	NA	NA
cg01180479	0.589384	0.350743	2.04481e-09	9.24031e-07	chr11	65374833	+	chr11:65374699-65375308	Island	CGCGCCCGGAGCTTGCTGCGCTTGAATGTCCCGCGGCGGCGGCGCACGTGCGGTCGCTCG[CG]GTCCACCTGCTGCAGCAGCAGCGTCAGCTCGCGCTCGAACACCTCTAGCTCCCACTGGGC	CTAGAGGTGTTCGAGCGCGAGCTGACGCTGCTGCTGCAGCAGGTGGACCG	MAP3K11	NM_002419	Body				TRUE	11:65131030-65131884			MAP3K11;MAP3K11	ENST00000534432.1;ENST00000532507.1	TSS1500;TSS1500	MAP3K11;MAP3K11;MAP3K11;MAP3K11;MAP3K11	ENST00000524856.1;ENST00000526647.1;ENST00000534432.1;ENST00000533032.1;ENST00000532507.1	3'UTR;TSS1500;TSS1500;3'UTR;TSS1500	NA	TRUE
cg01191039	0.620837	0.0419388	1.2319e-14	1.06222e-10	chr14	91883788	+	chr14:91883672-91885367	Island	CGGCTCCTGGCCCGGCCGAAAGCGCGGCGGGGTCCCGCGCCGGACGCACAACGGGGGCGC[CG]GCTCCAGAGTTACAAAGCTCCGGACTCCAGGACGCGGCCCCAACCCCGGCCGGGAGCCAC	CGGGGTTGGGGCCGCGTCCTGGAGTCCGGAGCTTTGTAACTCTGGAGCCG	CCDC88C	NM_001080414	Body				NA	14:90953269-90955229			RP11-895M11.3;CCDC88C;CCDC88C;CCDC88C	ENST00000557524.1;ENST00000541408.1;ENST00000389856.5;ENST00000554165.1	TSS1500;TSS1500;TSS200;3'UTR	RP11-895M11.3;CCDC88C;CCDC88C;CCDC88C;CCDC88C;CCDC88C	ENST00000557524.1;ENST00000556767.1;ENST00000541408.1;ENST00000554872.1;ENST00000389856.5;ENST00000554165.1	TSS1500;TSS1500;TSS1500;TSS1500;TSS200;3'UTR	NA	NA
cg01191743	0.679462	0.822607	2.2355e-07	2.68171e-05	chr1	43196846	-		OpenSea	TGGTGTTTCTCAAACTTCACTGTGTGTCTGAATCACCTGGAGATCTTGTTAAAAATGCCA[CG]TCTGAGTCACAGGGTCTGGGGCGGGGCCTGTGAATCTGCATTTCTAATGTTTCCAGGTGA	CGTGGCATTTTTAACAAGATCTCCAGGTGATTCAGACACACAGTGAAGTT							NA										NA	NA
cg01192900	0.223546	0.107341	2.15857e-05	0.000853407	chr11	111383668	+	chr11:111383168-111383892	Island	CCCGACCCCGCGTCGGCGCTGCGGACCGTCCGGGAGCTGCAGCCGCGGGTGCCCGGTGCT[CG]GTTTGTAGGCAGTGTCATTAGCTGATTGTACTGTGGTGGTTACAATCACTAACTCCACTG	CGGTTTGTAGGCAGTGTCATTAGCTGATTGTACTGTGGTGGTTACAATCA	MIR34B;BTG4;MIR34C	NR_029839;NM_017589;NR_029840	Body;TSS1500;TSS1500				NA	11:110888351-110889102	11:111383150-111383771	Unclassified_Cell_type_specific	MIR34C;BTG4;BTG4;MIR34B	ENST00000384831.1;ENST00000525791.1;ENST00000356018.2;ENST00000385076.1	TSS1500;TSS1500;TSS1500;5'UTR	MIR34C;BTG4;BTG4;BTG4;MIR34B	ENST00000384831.1;ENST00000525791.1;ENST00000456861.2;ENST00000356018.2;ENST00000385076.1	TSS1500;TSS1500;TSS1500;TSS1500;5'UTR	TRUE	TRUE
cg01194712	0.451478	0.184196	2.09192e-07	2.55364e-05	chr14	91643885	+		OpenSea	CAAGGCCAGCAGCAGTACATTTTTTCCAAGGCCTAGGTGATATTACAATGAAGAGACACA[CG]AGGGCGCCCTCGCTAGCTCTCAGTAAGATAGGAAGGTGACAGAAACATGAAAAATAACAG	CGAGGGCGCCCTCGCTAGCTCTCAGTAAGATAGGAAGGTGACAGAAACAT	C14orf159;C14orf159;C14orf159;C14orf159;C14orf159	NM_001102366;NM_001102368;NM_001102369;NM_001102367;NM_024952	Body;Body;Body;Body;Body				NA		14:91643637-91644850	Gene_Associated				C14orf159;C14orf159;C14orf159;C14orf159	ENST00000520130.1;ENST00000523837.1;ENST00000519994.1;ENST00000518649.1	5'UTR;3'UTR;3'UTR;5'UTR	NA	TRUE
cg01196158	0.617536	0.762374	7.37298e-07	6.47819e-05	chr1	93912688	-	chr1:93913636-93914524	N_Shore	GCTTGCTTGCTTTAGGAGACAAGCTATTAATACTAAAGCATATGTTAGGGAGTTGCTCAG[CG]TACTTGATATCTAGTAGCACCAGCCAAACTAGCTAACAGCCTTTCCATGGAGATAGGCCA	CGCTGAGCAACTCCCTAACATATGCTTTAGTATTAATAGCTTGTCTCCTA	FNBP1L;FNBP1L;FNBP1L	NM_017737;NM_001164473;NM_001024948	TSS1500;TSS1500;TSS1500				NA				FNBP1L;FNBP1L;FNBP1L	ENST00000370256.3;ENST00000260506.8;ENST00000370253.1	TSS1500;TSS1500;TSS1500	FNBP1L;FNBP1L;FNBP1L	ENST00000370256.3;ENST00000271234.7;ENST00000370253.1	TSS1500;TSS1500;TSS1500	NA	TRUE
cg01196788	0.834587	0.669652	5.46678e-06	0.000295333	chr2	19561709	+	chr2:19562749-19562965	N_Shore	CGCCAAACCCCAGCCCCTCTCCCGATTCCTGCTCCTTGGTAAAGCGCCCCAGCCTGTCTT[CG]GAGTGAAAATTGAGCAGCTTCCAGAAAATTAACTAGAATGTGGTCTATATTGCTTTGAGT	CGGAGTGAAAATTGAGCAGCTTCCAGAAAATTAACTAGAATGTGGTCTAT						RDMR	NA										NA	TRUE
cg01197871	0.579905	0.069222	5.03823e-11	6.34069e-08	chr16	89323411	+	chr16:89323280-89323661	Island	TGGCGCTCGGGGCGCTTCCAGCGCACGTCACCTCATCTGCGTCGTCACCACTGTCGCCTC[CG]AAAGCGCATTCCGTCGTCAAAATACACCACGAGGTCCCGGGTGCCCTCACCGCCCTCCCC	GAGGGCACCCGGGACCTCGTGGTGTATTTTGACGACGGAATGCGCTTTCG				high-CpG:87850847-87851112			TRUE	16:87850703-87851594	16:89323019-89324222	Unclassified							NA	TRUE
cg01202197	0.553964	0.442725	1.3028e-05	0.000576912	chr17	72889973	-	chr17:72889349-72890060	Island	GCCGCGGAGGGAGGAGCCAGGCCGATGAGCTGAGAGTGGCTAGGCGGGGAGGCGACCCTG[CG]GTGAGACCCAGCCCAGGTAGTAGGGACGGAGGCGTCAGGGGCACGGAGACCCCAGTGGAG	CGCAGGGTCGCCTCCCCGCCTAGCCACTCTCAGCTCATCGGCCTGGCTCC	FADS6	NM_178128	TSS1500			DMR	NA	17:70400963-70401805			FADS6	ENST00000310226.5	TSS1500	FADS6	ENST00000310226.5	TSS1500	NA	TRUE
cg01204844	0.871731	0.672519	7.21954e-07	6.38381e-05	chr22	40437423	-	chr22:40440852-40441810	N_Shelf	AGAGCACCCTGGCATAGCATTCTCTGACCTGGGCTGCCTTTTCAGGGTATGAGTTGATTC[CG]CAGGCACCAAGGCATGCCTGTAAGCCCTACAGGGCAGACGCCCTCACCCCAATCATTGGC	CATAGCATTCTCTGACCTGGGCTGCCTTTTCAGGGTATGAGTTGATTCCG						RDMR	NA										NA	TRUE
cg01207206	0.436827	0.720433	8.11666e-09	2.47443e-06	chr8	76061409	-		OpenSea	TTGTATACTTTGTATCAGTAGCACATGCCCCTCCATCATGTACTGGGTTTCTAAGGGTCA[CG]TGTCTGCAGTTTACTGAATTTGATCACTAGATGGCACTCTTGTATCCTTAATTAAATAAA	CGTGACCCTTAGAAACCCAGTACATGATGGAGGGGCATGTGCTACTGATA							NA										NA	NA
cg01207951	0.331176	0.688984	2.65307e-05	0.000999552	chr2	74208655	+	chr2:74211214-74212314	N_Shelf	GGGGTGGCGCCCGCCAAACCCGCTCCTAAAAGGAGCCTCTCTCCCTCTGTCTGCTCTAAG[CG]CCTTGGGGGCCTAATCGCAGTCTCCACCTGGGTGCTGAACTTCCTTCTCCCCCGCTTGCT	CGCCTTGGGGGCCTAATCGCAGTCTCCACCTGGGTGCTGAACTTCCTTCT							NA	2:74062048-74062218	2:74208624-74208660	Unclassified_Cell_type_specific	DGUOK-AS1;DGUOK-AS1;DGUOK-AS1	ENST00000413452.1;ENST00000439192.1;ENST00000453103.1	TSS200;TSS200;TSS200	DGUOK-AS1;DGUOK-AS1;DGUOK-AS1	ENST00000413452.1;ENST00000439192.1;ENST00000453103.1	TSS200;TSS200;TSS200	NA	TRUE
cg01211595	0.519209	0.801724	3.83467e-08	7.47565e-06	chr4	38490612	-		OpenSea	AGCTAGCCAAAATATTCACTTAGCATGCTTCTTTATTTTTTCACTTAAAATCATAACACA[CG]TGTCCCCCTATGTGGTTATGTAAGCTTCCTAAACATTGTCTTGAATGGCTGCATAAATTC	TATTCACTTAGCATGCTTCTTTATTTTTTCACTTAAAATCATAACACACG	LINC01258	NR_110951	Body				NA				RP11-83C7.2	ENST00000512517.1	3'UTR	RP11-83C7.2	ENST00000512517.1	3'UTR	NA	NA
cg01212346	0.173415	0.0276861	1.47697e-07	1.98192e-05	chr11	117856961	+	chr11:117856638-117857298	Island	GATCCGAAGGCACTGGAGGCCCAGAGGGAAGGAAAGGGAGGGGTGGCCGGAGCCCGCTAG[CG]CCCCAGGACAGCCTCGGGTTGCCCCAGGCGGTAGCCCTGTGGGACAGTGGTTCCCCGTCC	CGCCCCAGGACAGCCTCGGGTTGCCCCAGGCGGTAGCCCTGTGGGACAGT	IL10RA;IL10RA	NM_001558;NR_026691	TSS200;TSS200	high-CpG:117362124-117362421			TRUE	11:117361864-117362508	11:117856414-117858450	Promoter_Associated	IL10RA;IL10RA;IL10RA;IL10RA	ENST00000227752.3;ENST00000533700.1;ENST00000545409.1;ENST00000536858.1	TSS200;TSS200;TSS200;TSS200	IL10RA;IL10RA;IL10RA;IL10RA;IL10RA;IL10RA;IL10RA	ENST00000529924.1;ENST00000227752.3;ENST00000530761.1;ENST00000533700.1;ENST00000526544.1;ENST00000536858.1;ENST00000531365.1	TSS1500;TSS200;TSS200;TSS200;TSS200;TSS200;TSS200	NA	NA
cg01217984	0.652002	0.403788	3.30151e-07	3.55825e-05	chr7	27143235	-	chr7:27143181-27143479	Island	GAGTCTGCGCCCCGGGCCCATTGTTAGCAGGCTATTCCACGGCAGCTTTGCATCTGGCTC[CG]GCGGGAAGCGGAAAACGGGAGGCGGCTCTCGAAGCTTCCCGACCTTCCTGCGCCATCAAC	CGGGCCCATTGTTAGCAGGCTATTCCACGGCAGCTTTGCATCTGGCTCCG	HOXA2	NM_006735	TSS1500			RDMR	NA	7:27109739-27110004			HOXA2	ENST00000222718.5	TSS1500	HOXA2	ENST00000222718.5	TSS1500	NA	TRUE
cg01219205	0.6209	0.724599	4.95052e-06	0.000273606	chr1	33937433	+	chr1:33938025-33938328	N_Shore	ATAGATGAAAATTCCAAAGACAAAATAGATGGCAGTAATTTGTTCAAGGCCACACAGCTG[CG]AAGTAGTTGAGTTGGGATTTGGATCCATGTCTGACTACAAAGCCCCCATTCTCAACACCA	TGGGGGCTTTGTAGTCAGACATGGATCCAAATCCCAACTCAACTACTTCG	ZSCAN20	NM_145238	TSS1500				TRUE				ZSCAN20;ZSCAN20;ZSCAN20;ZSCAN20;ZSCAN20	ENST00000373411.2;ENST00000326544.5;ENST00000373413.1;ENST00000361328.2;ENST00000480917.1	TSS1500;TSS1500;TSS1500;TSS1500;TSS1500	ZSCAN20;ZSCAN20;ZSCAN20;ZSCAN20;ZSCAN20	ENST00000373411.2;ENST00000326544.5;ENST00000373413.1;ENST00000361328.2;ENST00000480917.1	TSS1500;TSS1500;TSS1500;TSS1500;TSS1500	NA	TRUE
cg01219306	0.879681	0.739142	4.838e-07	4.71726e-05	chr16	13485366	-		OpenSea	GATACTGAAGTATTATACTTGGAAGCAGCAAACAAAAATCAGTCCCCAACGAATCTATGC[CG]TGCCATCTGCAGTCAATATGCATTATTACAGTTACACAGATGGCTGGGTTCGGGGGGAGT	CGGCATAGATTCGTTGGGGACTGATTTTTGTTTGCTGCTTCCAAGTATAA							NA				U91319.1;U91319.1	ENST00000571619.1;ENST00000574540.1	5'UTR;5'UTR	U91319.1;U91319.1	ENST00000571619.1;ENST00000574540.1	5'UTR;5'UTR	NA	NA
cg01219451	0.444729	0.27111	2.39426e-05	0.00092375	chrX	64627700	+	chrX:64626743-64628045	Island	TGAGGCCGGGGGGTTGGAGCACTGCCCCCGCGCACAGTCCCCGAACGCCCGACGTCTCCG[CG]CAGGTTATTGAAGCAGCTGGGCCTGGGGCGCCCACTAATGTGGCCCTGAGGGCCGGAGCC	CAGGGCCACATTAGTGGGCGCCCCAGGCCCAGCTGCTTCAATAACCTGCG							NA	X:64543779-64544801			TLE1P1	ENST00000426165.1	TSS1500	TLE1P1	ENST00000426165.1	TSS1500	NA	TRUE
cg01221286	0.653209	0.758421	2.09658e-07	2.55786e-05	chr1	109567486	-		OpenSea	TATTCTAACCAAGCTTGCAGAAACATAAACATACACATGTGGACTGGGTGTAGTGACTCA[CG]CCTGTAGTCCCAGCACTTTGGGAGGCTGAAGCAGGAGGATCGCTTGAGCCCAGAAGTTAG	GCTTGCAGAAACATAAACATACACATGTGGACTGGGTGTAGTGACTCACG	WDR47;WDR47;WDR47	NM_001142551;NM_014969;NM_001142550	5'UTR;5'UTR;5'UTR				NA				WDR47;WDR47;WDR47;WDR47	ENST00000400794.3;ENST00000369962.3;ENST00000369965.4;ENST00000357672.3	5'UTR;5'UTR;5'UTR;5'UTR	WDR47;WDR47;WDR47;WDR47;WDR47;WDR47;WDR47;WDR47	ENST00000528747.1;ENST00000531337.1;ENST00000529074.1;ENST00000530772.1;ENST00000400794.3;ENST00000369962.3;ENST00000369965.4;ENST00000357672.3	ExonBnd;5'UTR;5'UTR;5'UTR;5'UTR;5'UTR;5'UTR;5'UTR	NA	NA
cg01224891	0.229328	0.0382706	5.42959e-06	0.000293722	chr10	8096368	-	chr10:8091374-8098329	Island	AATCGTCCACCCGACCCGAATGAATTGGCAGGAGCCGCGGCCACATTTAAAGGGCCAGAG[CG]CGCGTTCCCTCCCGTCCGCCCCCAAGCCCCGCGGGCCTCGCCCACCCTGCCCGCCGCCCC	GACCCGAATGAATTGGCAGGAGCCGCGGCCACATTTAAAGGGCCAGAGCG	FLJ45983;GATA3;GATA3;FLJ45983	NR_024255;NM_002051;NM_001002295;NR_024256	TSS1500;TSS1500;TSS1500;TSS1500			DMR	NA	10:8136306-8136657			GATA3;GATA3;GATA3;RP11-379F12.3;RP11-379F12.7	ENST00000379328.3;ENST00000544011.1;ENST00000346208.3;ENST00000458727.1;ENST00000355358.1	TSS1500;TSS1500;TSS1500;TSS1500;TSS1500	GATA3;GATA3;GATA3;RP11-379F12.3;GATA3;RP11-379F12.3;RP11-379F12.7	ENST00000379328.3;ENST00000544011.1;ENST00000346208.3;ENST00000417359.1;ENST00000481743.1;ENST00000458727.1;ENST00000355358.1	TSS1500;TSS1500;TSS1500;TSS1500;5'UTR;TSS1500;TSS1500	NA	TRUE
cg01230227	0.662427	0.831682	1.66474e-07	2.16779e-05	chr8	86202807	-		OpenSea	TCTTACATAAATCAAGGCTGTGGCAGTAAACAATACTAGTAGTCTTCACCACTGTCCAAT[CG]CAGTTTTAAAATGTTATTGTCTTTCAAGAATGTTCTAGTTCCTAAGTAAAAATTACTAAT	CAAGGCTGTGGCAGTAAACAATACTAGTAGTCTTCACCACTGTCCAATCG							NA										NA	NA
cg01232604	0.768462	0.222895	7.12301e-10	4.34094e-07	chr7	5632262	-	chr7:5632335-5634555	N_Shore	TAGGTGGCTGGCGCGGGGAGCCGGGGTTGTGAGGGGTGATGTCCTCAGGCGGCGGCGCTG[CG]GGGTGCGGCGAGGACACCGGTGGGGTGAGAGCACCGGCGGGGCAGCAGCGGGGGCCGCAG	GCGGGGAGCCGGGGTTGTGAGGGGTGATGTCCTCAGGCGGCGGCGCTGCG	FSCN1	NM_003088	TSS200			DMR	NA	7:5598606-5601072	7:5632123-5632552	Unclassified	FSCN1;FSCN1	ENST00000340250.6;ENST00000382361.3	TSS200;TSS200	FSCN1;FSCN1;FSCN1	ENST00000444748.1;ENST00000340250.6;ENST00000382361.3	TSS1500;TSS200;TSS200	NA	TRUE
cg01233392	0.713023	0.81679	2.54951e-07	2.9401e-05	chr1	85665444	+	chr1:85665818-85667650	N_Shore	AGGGTTTTTTTTGTTTGATTTGTTTGGGTTTTTGGTTGTGTGTATGTATGCATGTGTGTG[CG]TGCCTGGGAGAGGCAAAAAAAAAAAGTTGTAATGAGTAAAATGACAGTTTATGAAGCCTA	ACTGTCATTTTACTCATTACAACTTTTTTTTTTTGCCTCTCCCAGGCACG	SYDE2	NM_032184	Body				NA							SYDE2	ENST00000234668.6	3'UTR	NA	TRUE
cg01237056	0.682777	0.510185	1.75051e-05	0.000723925	chr22	43739992	-	chr22:43738882-43740285	Island	CGAACTTTTTAGCACTCGTCAAAGGACAGTGGCCCGTCAGTGTGCTTGTCACGGGGCGGC[CG]CAGGACCTGCGTCTGGAACCGGGCGGGCGCCCGGGACGGACAATGCCGCTTGGCGGTCGG	CGGCCGCCCCGTGACAAGCACACTGACGGGCCACTGTCCTTTGACGAGTG	SCUBE1	NM_173050	TSS1500			DMR	NA	22:42069892-42070129	22:43739018-43740220	Unclassified	SCUBE1;SCUBE1;SCUBE1;SCUBE1	ENST00000434132.2;ENST00000290460.7;ENST00000381243.3;ENST00000360835.3	TSS1500;TSS1500;TSS1500;TSS1500	SCUBE1;SCUBE1;SCUBE1;SCUBE1	ENST00000434132.2;ENST00000290460.7;ENST00000381243.3;ENST00000360835.3	TSS1500;TSS1500;TSS1500;TSS1500	NA	TRUE
cg01237333	0.550756	0.354868	4.27844e-10	3.01651e-07	chr9	113530	-	chr9:112916-114839	Island	GGCGACGAAGCGGAGAGCTGTGTCCAGACTCCGGAGAGAAACTCCGGCTCCGCGGGGCGG[CG]CGGGGCGGCGCGGGGCCCGGAGCTGCCCAACTCCGCCGCCTCGGGAAGGCGGCTTCGGGC	GAGAGCTGTGTCCAGACTCCGGAGAGAAACTCCGGCTCCGCGGGGCGGCG							NA	9:103156-104795			RP11-143M1.4	ENST00000416242.1	3'UTR	RP11-143M1.4	ENST00000416242.1	3'UTR	NA	TRUE
cg01239666	0.536197	0.929549	1.79198e-10	1.63811e-07	chr3	195601381	-	chr3:195600845-195602361	Island	GGGAAGGAGAGTAAGAGTGCGGAGGACGTGTGCAAGAAGCTCCCCTCGGGATGGCGCCCA[CG]CACACTCCGAGGCACAAGAAACTCCCCCTCGGGATGGCGCCCACGCACGCTCCGAGGCAC	AAGAGTGCGGAGGACGTGTGCAAGAAGCTCCCCTCGGGATGGCGCCCACG	TNK2;TNK2	NM_001010938;NM_005781	Body;Body				NA	3:197085695-197087283						TNK2;TNK2;TNK2;TNK2;TNK2	ENST00000478623.1;ENST00000489628.1;ENST00000464041.1;ENST00000481865.1;ENST00000486523.1	3'UTR;3'UTR;3'UTR;3'UTR;3'UTR	NA	TRUE
cg01246266	0.657186	0.445325	6.18257e-06	0.000324416	chr17	76126490	+	chr17:76127521-76128406	N_Shore	TTGGCCCCTGTGCCCCCACCGTTCCCATCCCCACCCATGTCAGGCTCCCAGCTCAGGCCT[CG]AGGTCAAGTCCTGCCTATCCAGGCTGGAAGGAGTTGAACAGAGAGGGCCTCAGCTGCAGG	GCCCTCTCTGTTCAACTCCTTCCAGCCTGGATAGGCAGGACTTGACCTCG	TMC8;TMC6	NM_152468;NM_007267	TSS1500;5'UTR				NA		17:76126392-76126985	Promoter_Associated	TMC6;TMC8	ENST00000322914.2;ENST00000301627.4	5'UTR;TSS1500	TMC6;TMC8	ENST00000322914.2;ENST00000301627.4	5'UTR;TSS1500	NA	TRUE
cg01246665	0.229822	0.418929	4.63238e-07	4.56702e-05	chr15	93258479	+	chr15:93257748-93258222	S_Shore	TTTCAAGGATAATCTTAAGTATAGAAGTTGGTTTTAGTCTAACGTCTTGCCTTTCAGAAA[CG]ACTTGGGAGACAGAAAGAAAGAAAAATGAACGTTTAAAATTTTATCAGAGCCAGACGAGG	CGACTTGGGAGACAGAAAGAAAGAAAAATGAACGTTTAAAATTTTATCAG						RDMR	NA		15:93257302-93258559	Unclassified	FAM174B	ENST00000557398.1	5'UTR	FAM174B;FAM174B	ENST00000554000.1;ENST00000557398.1	3'UTR;5'UTR	NA	TRUE
cg01247223	0.306153	0.449557	1.07427e-05	0.000496276	chr11	876883	+		OpenSea	GTCTCTAGGCAGGGACAGACAGGGCAAGAGCTACTGGCCACCCAGGATGGGACGTGGGGA[CG]GGCACTCTAGGGGCCCCTGAGACCCAGATCTCCCTATGGCCTGCTCCCCTCCAGTGGTCC	CGGGCACTCTAGGGGCCCCTGAGACCCAGATCTCCCTATGGCCTGCTCCC	CHID1;CHID1;CHID1;CHID1;CHID1	NM_001142677;NM_023947;NM_001142674;NM_001142675;NM_001142676	Body;Body;Body;Body;Body				NA				CHID1	ENST00000526714.1	3'UTR	CHID1;CHID1	ENST00000528534.1;ENST00000526714.1	3'UTR;3'UTR	NA	NA
cg01249180	0.436703	0.127939	2.42158e-05	0.000931871	chr5	95997867	-	chr5:95997717-95999117	Island	TCCAACCCCTTCTTTCTGACCAACCGGGACCAGAGCAGTGCTGGGGCCGGGGCGGGTCAC[CG]GGTGAGGACCGGGGCGGAGGGTGTTAAGTTACAGGGCAGGAGCCCGGGTCCCTCCGCGGG	TTTCTGACCAACCGGGACCAGAGCAGTGCTGGGGCCGGGGCGGGTCACCG	CAST;CAST;CAST;CAST;CAST	NM_001042441;NM_001042442;NM_173063;NM_001750;NM_001042440	TSS200;TSS200;TSS200;TSS200;TSS200	high-CpG:96023479-96023976			NA	5:96023410-96024976	5:95997732-95998104	Promoter_Associated	CAST;CAST;CAST;CAST;CAST;CAST;CAST	ENST00000510756.1;ENST00000508608.1;ENST00000395812.2;ENST00000338252.3;ENST00000508830.1;ENST00000508830.1;ENST00000338252.3	TSS1500;TSS1500;TSS200;1stExon;1stExon;5'UTR;5'UTR	CAST;CAST;CAST;CAST;CAST;CAST;CAST;CAST;CAST;CAST;CAST;CAST;CAST;CAST	ENST00000515160.1;ENST00000421689.2;ENST00000507836.1;ENST00000512620.1;ENST00000514845.1;ENST00000510245.1;ENST00000506811.1;ENST00000508608.1;ENST00000511097.2;ENST00000395812.2;ENST00000338252.3;ENST00000508830.1;ENST00000508830.1;ENST00000338252.3	TSS1500;TSS1500;TSS1500;TSS1500;TSS1500;TSS1500;TSS1500;TSS1500;TSS200;TSS200;1stExon;1stExon;5'UTR;5'UTR	NA	TRUE
cg01252235	0.337611	0.531439	2.15491e-05	0.000852381	chr9	101720582	-		OpenSea	CAATTCTAAAAGCATCGTTAGCATGAACATGCTAGGATATCTGAGTTCAGTTTGGCCGCA[CG]TTCTGGCAGTTGGGGGCAGTGATTCGGCTCAGCTCTGCTCAGCCCTGTTCATCTCACTGC	CGTGCGGCCAAACTGAACTCAGATATCCTAGCATGTTCATGCTAACGATG	COL15A1	NM_001855	Body				NA							COL15A1	ENST00000471477.1	5'UTR	NA	NA
cg01252455	0.458956	0.711383	1.43567e-08	3.65544e-06	chr5	175294907	-	chr5:175298515-175300066	N_Shelf	CTCACACCATGCCATTCCATGTTAAAGGAGGTACACTGGGACCCTCACAGTGATGGCACC[CG]GCCATTGTCAGTGACAAGAGGGAAGGCACTCATCAGATGAGCAAGGTGGCCTAGAGCCCT	CATTCCATGTTAAAGGAGGTACACTGGGACCCTCACAGTGATGGCACCCG	CPLX2	NM_006650	5'UTR			RDMR	NA		5:175294757-175295306	Unclassified_Cell_type_specific	CPLX2	ENST00000359546.4	5'UTR	CPLX2;CPLX2;CPLX2	ENST00000509837.1;ENST00000359546.4;ENST00000515502.1	5'UTR;5'UTR;5'UTR	NA	TRUE
cg01252526	0.741178	0.155344	9.48022e-06	0.000450345	chr16	711033	+	chr16:711065-711414	N_Shore	GTTCGGCCCCTCCCCAGGCCCCTCCCCGCCCCCCCCCCCCCCCGGCCCGGCCTCAGGCCC[CG]CCCTCTCTGCGCACAGGCTTCTTTGCCTACACGTGCGGCCGCCTGGTGGTGGTGGAGGAC	CACCAGGCGGCCGCACGTGTAGGCAAAGAAGCCTGTGCGCAGAGAGGGCG	WDR90	NM_145294	Body				TRUE	16:650649-651454	16:710398-711587	Gene_Associated	WDR90;MSLN	ENST00000549091.1;ENST00000446427.2	ExonBnd;5'UTR	WDR90;WDR90;WDR90;WDR90;WDR90;WDR90;WDR90;WDR90;WDR90;WDR90;MSLN	ENST00000546516.1;ENST00000547407.1;ENST00000552683.1;ENST00000548844.1;ENST00000550902.1;ENST00000546923.1;ENST00000548603.1;ENST00000549024.1;ENST00000549091.1;ENST00000552943.1;ENST00000446427.2	5'UTR;5'UTR;5'UTR;5'UTR;TSS1500;TSS1500;TSS1500;TSS200;ExonBnd;5'UTR;5'UTR	NA	TRUE
cg01257185	0.651903	0.810956	1.78982e-05	0.00073684	chr11	122552765	+		OpenSea	TCAGAACAAGATGGGCCCATCTCCTGTCTGTTCTCCCTGCCTTGTCAAAAAAGCACCAGT[CG]TGAATCATCTGCCCATGTACAGCCACTTGGAAGCTCGGAGGGATCACTGCGAGGATAGCG	AGTGATCCCTCCGAGCTTCCAAGTGGCTGTACATGGGCAGATGATTCACG	UBASH3B	NM_032873	Body		chr11:122552605-122552605		NA				UBASH3B	ENST00000525711.1	5'UTR	UBASH3B	ENST00000525711.1	5'UTR	NA	NA
cg01257937	0.575372	0.819506	4.85178e-06	0.000269295	chr5	83218678	-		OpenSea	AAGGCAACAATGTATGAAGCTCCTGCTACTAATTACCACCTGTGTTCAACATGCTCATCA[CG]CAAGCCTGAGCCCGATGTGCCACTTTGAGCTCAGGAGGGCACTGTGATACTGAGCAAAGG	TATGAAGCTCCTGCTACTAATTACCACCTGTGTTCAACATGCTCATCACG							NA										NA	NA
cg01258200	0.422652	0.159639	2.29601e-05	0.000895537	chr4	77819018	+	chr4:77818015-77819600	Island	GCACAGAAAGTCCAGTAGTGCCTCCTGGCTCAGCTCTCGGGCCATCGCTGCCTTGTCCTC[CG]CCCCAGAGGTGTCTGAGTCTCGCCCTCCCGGGGCTCTCCCCAGCCAGAGGAAACCCTGGC	CGCCCCAGAGGTGTCTGAGTCTCGCCCTCCCGGGGCTCTCCCCAGCCAGA	ANKRD56	NM_001029870	TSS200				NA	4:78036974-78038652			SOWAHB	ENST00000334306.2	TSS200	SOWAHB	ENST00000334306.2	TSS200	NA	TRUE
cg01263075	0.454845	0.189017	1.78928e-05	0.000736666	chr4	89080199	+	chr4:89079756-89080454	Island	GGCCGCGATAAGCGCCCTGCGACCCGGCTGAAAGCGCACACGTGTCCTGCCGCGCTGAGC[CG]CCAGCAGGACTGGTACCACCGCCCTCCCTCGGGGCTAGGGTCACCCTGCCGTGACACGCA	CGCCAGCAGGACTGGTACCACCGCCCTCCCTCGGGGCTAGGGTCACCCTG	ABCG2	NM_004827	TSS200				TRUE	4:89298611-89299448	4:89079744-89080324	Unclassified_Cell_type_specific	ABCG2;ABCG2	ENST00000237612.3;ENST00000515655.1	TSS200;5'UTR	ABCG2;ABCG2;ABCG2	ENST00000505480.1;ENST00000237612.3;ENST00000515655.1	TSS1500;TSS200;5'UTR	NA	TRUE
cg01265031	0.515552	0.747802	4.95077e-06	0.000273606	chr6	146611822	-		OpenSea	TCTTTCAATTTTCTCTCTTTTTGAATGGGAATGTCTATATACTGGTACTCCATGCCTGTC[CG]ACTATTGTATTTTGAGGAGCAGATAATTTGTTTTCTAATTTCACAGGCATAGATGGAGAG	CGGACAGGCATGGAGTACCAGTATATAGACATTCCCATTCAAAAAGAGAG	GRM1;GRM1;GRM1;GRM1	NM_001278065;NM_001278066;NM_001278067;NM_001278064	Body;Body;Body;Body		chr6:146611524-146611524		NA										NA	NA
cg01269620	0.261212	0.0772567	1.74287e-06	0.000123687	chr6	166074191	-	chr6:166073882-166077752	Island	ACCTCGGGTGCCCTGGAGACCCGGGTCGGCCAAAGCCTGGGAATGAGCCGCAGTTGGGAG[CG]GGAAACCGAAACAGCAATCCTGGAAGAGCGTCGGCCCAGAGAAGGCGCCGCGGAAACGCG	CTGGAGACCCGGGTCGGCCAAAGCCTGGGAATGAGCCGCAGTTGGGAGCG	PDE10A;PDE10A	NM_001130690;NM_006661	Body;5'UTR			DMR	NA	6:165993888-165998209			PDE10A	ENST00000366882.1	5'UTR	PDE10A	ENST00000366882.1	5'UTR	NA	TRUE
cg01270709	0.625605	0.809906	5.89442e-06	0.000312722	chr11	57519364	+	chr11:57520333-57520753	N_Shore	TCACTGTATCACACTAACCAGCAGAGGGTGCACAATAAAGAAGAGAAGCCTCTGACTCTG[CG]GGAAGGTCTCTCACAGAACCAAGGACGTTGCCACCCTTGGCTGGGTGTACTTGACCAAAG	CGGGAAGGTCTCTCACAGAACCAAGGACGTTGCCACCCTTGGCTGGGTGT	BTBD18	NM_001145101	TSS200				TRUE		11:57519121-57519670	Unclassified	BTBD18;CTNND1;BTBD18;CTNND1;RP11-691N7.6	ENST00000436147.2;ENST00000524630.1;ENST00000422652.1;ENST00000529919.1;ENST00000531074.1	TSS1500;TSS1500;TSS200;TSS1500;3'UTR	BTBD18;CTNND1;BTBD18;CTNND1;CTNND1;RP11-691N7.6	ENST00000436147.2;ENST00000524630.1;ENST00000422652.1;ENST00000529919.1;ENST00000533189.1;ENST00000531074.1	TSS1500;TSS1500;TSS200;TSS1500;TSS1500;3'UTR	NA	TRUE
cg01271932	0.384451	0.734722	1.49522e-09	7.41877e-07	chr7	136971822	-		OpenSea	ATAAGAACTTAACTTGATTTGAGTCCTAATTATTCTATTTATTATGTAAAAACCCTCATT[CG]TGTTTCATGAACGTAATCATCAGCTATCCCATTTCATAGACTGAAATCTCTGTGCTATGT	CTTGATTTGAGTCCTAATTATTCTATTTATTATGTAAAAACCCTCATTCG	PTN	NM_002825	5'UTR				NA				SNORD81;PTN;PTN	ENST00000365153.1;ENST00000393083.2;ENST00000348225.2	TSS1500;5'UTR;5'UTR	SNORD81;PTN;PTN	ENST00000365153.1;ENST00000393083.2;ENST00000348225.2	TSS1500;5'UTR;5'UTR	NA	NA
cg01273351	0.804287	0.479864	9.58203e-07	7.89921e-05	chr13	61989893	+		OpenSea	CAACTTCTGTGTAACGTAGGGTGAACCGGAAAAGTAAATATATGAATTCAGTGAAGGTTT[CG]ACATACCCCAATTTTGAATCTTTGCTGTGGGCAGTGGTAGAGCTTCTGCTAGTTTCCTAG	CGACATACCCCAATTTTGAATCTTTGCTGTGGGCAGTGGTAGAGCTTCTG	PCDH20	NM_022843	TSS1500				NA				PCDH20;PCDH20;PCDH20;PCDH20	ENST00000358674.6;ENST00000409204.3;ENST00000409186.1;ENST00000409186.1	TSS1500;TSS1500;ExonBnd;5'UTR	PCDH20;PCDH20;PCDH20;PCDH20	ENST00000358674.6;ENST00000409204.3;ENST00000409186.1;ENST00000409186.1	TSS1500;TSS1500;ExonBnd;5'UTR	NA	NA
cg01277451	0.240109	0.382782	6.8881e-06	0.00035299	chr13	78314553	+		OpenSea	GAAGTGTCCTGGGAGGCAGTTTAGCTTAAGGCATTTGGGAAAGAAAACTGTGCCAAGTAT[CG]TACATTGATTCAGTGTGTAGTCCTGTTTGGGGCCAGTTCGATGCTATTCTAGGGATTGGA	CGTACATTGATTCAGTGTGTAGTCCTGTTTGGGGCCAGTTCGATGCTATT	SLAIN1;SLAIN1	NM_001040153;NM_144595	Body;TSS1500				TRUE				SLAIN1;SLAIN1;SLAIN1	ENST00000351546.3;ENST00000465831.1;ENST00000314070.5	TSS1500;TSS1500;TSS1500	SLAIN1;SLAIN1;SLAIN1;SLAIN1;SLAIN1;SLAIN1;SLAIN1	ENST00000351546.3;ENST00000465831.1;ENST00000441784.1;ENST00000314070.5;ENST00000462234.1;ENST00000496045.1;ENST00000377236.1	TSS1500;TSS1500;TSS1500;TSS1500;TSS1500;TSS1500;5'UTR	NA	TRUE
cg01278720	0.444519	0.309021	2.27215e-07	2.70887e-05	chr22	21714908	+	chr22:21714633-21715811	Island	CGCCTTCCGCACCTCGCCTAGGCTGCCCTTGTGCGGCCGCCCTCAGTCCCCGCCACCTTG[CG]GGGCCCCAGGCGGCACTGGCATCTTCTTGTGGTTCTTCCTGACCGGGGCTCGGTGCGCTC	CGGGGCCCCAGGCGGCACTGGCATCTTCTTGTGGTTCTTCCTGACCGGGG							NA	22:20044659-20045788									NA	TRUE
cg01283794	0.412844	0.700268	3.29185e-06	0.000199774	chr20	54746401	+		OpenSea	AAAACCATCTGCACCCATTGCTCCAAGGAGATGGCTCAGCTCAAGCCTGGTGAAGTTCCA[CG]CACAGTGCAGCTGCACAGTGGCATCAGTGGATGCTATCATCATCATGAAATCCAAACTGA	CGCACAGTGCAGCTGCACAGTGGCATCAGTGGATGCTATCATCATCATGA							NA										NA	NA
cg01286133	0.253019	0.697456	4.761e-08	8.71942e-06	chr21	27540106	-	chr21:27541893-27543524	N_Shore	TTGCATGTTCCTTTTCATTTCCTCAGTCAGGACCAGTATTATTCCATCTAGTAACTTCTC[CG]CAGTACTAATAGCCTTGCAAATGTCGTTCAGGAGCCTCTGCTGGTTCCGGTGACAAGAGA	CGGAGAAGTTACTAGATGGAATAATACTGGTCCTGACTGAGGAAATGAAA	APP;APP;APP;APP;APP	NM_201413;NM_000484;NM_201414;NM_001136129;NM_001136130	Body;Body;Body;Body;Body			RDMR	NA				AP001439.2;APP;APP	ENST00000455275.1;ENST00000474136.1;ENST00000448388.2	5'UTR;3'UTR;5'UTR	AP001439.2;APP;APP;APP	ENST00000455275.1;ENST00000474136.1;ENST00000466453.1;ENST00000448388.2	5'UTR;3'UTR;3'UTR;5'UTR	NA	TRUE
cg01289541	0.0823119	0.4336	5.44363e-09	1.8818e-06	chr3	170282058	+		OpenSea	TAGAAATTATAGGTCCTCACTGGAGAACAGAAACTGATTCTGAATCATTTCCAGAGCCTC[CG]AAAAGGCACTTCCTGTTGTTAGAGATCTGTTGTGCTGAGGTTAGATTGTAGCTGCTGGTC	CAATCTAACCTCAGCACAACAGATCTCTAACAACAGGAAGTGCCTTTTCG	SLC7A14	NM_020949	5'UTR				TRUE				SLC7A14	ENST00000231706.4	5'UTR	CLDN11;SLC7A14	ENST00000480067.1;ENST00000231706.4	5'UTR;5'UTR	NA	TRUE
cg01291285	0.720281	0.821633	1.71245e-08	4.14044e-06	chr1	63001286	+		OpenSea	CTGTTGGCGGAAAGGCACGGATAATTCAAACATATTTGCAATCTTTTGGTCTTGTACATT[CG]TAGAAAATCCAGAACTCTGTTGGAAAGTGAGGCAGAACAAGACTATAACAGCAGTGCAAC	CGTAGAAAATCCAGAACTCTGTTGGAAAGTGAGGCAGAACAAGACTATAA	DOCK7;DOCK7;DOCK7;DOCK7;DOCK7;DOCK7;DOCK7;DOCK7	NM_001271999;NM_033407;NM_001272001;NM_001272000;NM_001271999;NM_033407;NM_001272001;NM_001272000	ExonBnd;ExonBnd;ExonBnd;ExonBnd;Body;Body;Body;Body				NA				DOCK7;DOCK7	ENST00000395441.3;ENST00000371140.4	TSS200;ExonBnd	DOCK7;DOCK7	ENST00000395441.3;ENST00000371140.4	TSS200;ExonBnd	NA	NA
cg01295034	0.614939	0.86481	1.05527e-06	8.51247e-05	chr16	48576092	-		OpenSea	CTGGGGAGCCTGCTGCCTGCCCGGCCACTCCTCAGCTGTGGCTGTGGCTGTGGGCATGGC[CG]GACGGCGTGCACACTGGGCCGTCCCCTTTTGCGCAGGGTGGAAGGGGGAAGGAGGGTGGG	CGGCCATGCCCACAGCCACAGCCACAGCTGAGGAGTGGCCGGGCAGGCAG	N4BP1	NM_153029	3'UTR				NA		16:48575400-48576711	Unclassified	N4BP1	ENST00000262384.3	3'UTR	N4BP1	ENST00000262384.3	3'UTR	NA	TRUE
cg01295203	0.700526	0.19043	1.78685e-13	9.0466e-10	chr8	70984199	+	chr8:70981873-70984888	Island	GATGGGCCTCCCGCGCCGCCGCAGCTGTCACTTCCTTCGGGAAAGGCTAGCGACCTTGGA[CG]CGCAGGCTCTGAAAACCAAGGTCCAGACCCATACCGAGCGCCCAAAGACCGCATTTGAAT	CGCGCAGGCTCTGAAAACCAAGGTCCAGACCCATACCGAGCGCCCAAAGA	PRDM14	NM_024504	TSS1500			DMR	NA	8:71144880-71147746			PRDM14	ENST00000276594.2	TSS1500	PRDM14;PRDM14	ENST00000276594.2;ENST00000426346.1	TSS1500;TSS1500	TRUE	TRUE
cg01295392	0.468745	0.133779	1.45059e-08	3.68756e-06	chr12	108169569	+	chr12:108168986-108169570	Island	AGCTAGCGAGCGCCCGAACTGGCCAGGACCCCCGCGCCCGCCGCACAGCGCGCAGCCGGG[CG]CTCAACCTAAGGTCCTCTTCGAAGGTGGTTTGCATTCTTAATCTGGCATCTTCTCCAGGC	TGCCAGATTAAGAATGCAAACCACCTTCGAAGAGGACCTTAGGTTGAGCG	ASCL4;ASCL4	NM_203436;NM_203436	1stExon;3'UTR				TRUE	12:106693117-106693700			ASCL4;ASCL4	ENST00000342331.4;ENST00000342331.4	1stExon;3'UTR	ASCL4;ASCL4	ENST00000342331.4;ENST00000342331.4	1stExon;3'UTR	NA	TRUE
cg01297530	0.0745973	0.438492	2.06152e-08	4.747e-06	chr21	35724208	-		OpenSea	GCACATGAGGCTGGTTTTCATTGTCACTGCAGAGGTGACACTTCTGGACTTTGACTGCTG[CG]TATGAACCAGGCACACTCGGCAGCACAGTGGGGACACATTGTGGCCATTTTGAATACCAC	CGCAGCAGTCAAAGTCCAGAAGTGTCACCTCTGCAGTGACAATGAAAACC							NA		21:35724006-35724855	Unclassified				AP000318.2	ENST00000362077.4	5'UTR	NA	NA
cg01300957	0.758721	0.870386	1.85108e-05	0.000757127	chr1	198328463	-		OpenSea	GCCAAGCAGTGTGCTAGTTGTAATTCACAAATTATCTTAATTCTCATATCTTACAGCCCC[CG]TTTTACAGATGAGAAAATGGTCGTTCAGTGTTTACAAAATTTAAGGAGGTCTCCACAATT	CGGGGGCTGTAAGATATGAGAATTAAGATAATTTGTGAATTACAACTAGC							NA		1:198328220-198328507	Unclassified_Cell_type_specific							NA	NA
cg01302823	0.777829	0.255151	5.56175e-11	6.81053e-08	chr22	40437213	+	chr22:40440852-40441810	N_Shelf	CCCTCCAGCAAAAAGCCAACTGTATAGAACACCACATATAGAGCGCTAAGAATAGCACAG[CG]CTCCAAGAACATAGTGCACTTGGCCTGCATACAAGTGTGCAGGGCTTAACGAGTCTTTTT	CGCTCCAAGAACATAGTGCACTTGGCCTGCATACAAGTGTGCAGGGCTTA						RDMR	NA										NA	NA
cg01303032	0.384157	0.675941	1.42262e-06	0.000106413	chr10	25940372	-		OpenSea	GAATAAGGTTACCCTTCTGTCACTCACATTTGATTACTCATAGACTTTTCTATTTGAAGA[CG]CATTAAGGAAAATTTTCCTTGCAAACAAATGTTGTCAAATGAATTGACCAACATGCATAC	CCTTCTGTCACTCACATTTGATTACTCATAGACTTTTCTATTTGAAGACG							NA				RP11-307B23.1	ENST00000450270.1	TSS1500	RP11-307B23.1	ENST00000450270.1	TSS1500	NA	TRUE
cg01304841	0.501886	0.799302	7.59383e-08	1.22296e-05	chr19	47045636	-		OpenSea	AAATCAATTTTAATAGAGTGGCACATTGAGAACATACCCTAAACATTCATTCTGTTCTCC[CG]TGCAGCCAGGAGCTCCAGTTAATTTTCCTGTTACCAGCCTCATTTGTTAACTCTGTTCAT	CGGGAGAACAGAATGAATGTTTAGGGTATGTTCTCAATGTGCCACTCTAT	PPP5D1	NM_001205281	Body				NA		19:47045577-47046314	Unclassified							NA	NA
cg01305736	0.438355	0.201741	6.9972e-06	0.000357347	chr17	40831891	-	chr17:40831682-40832452	Island	CAGCCAGTAGATCGGCAGTATCCAGCAGCAGGGCGAGGCTGTAGGGCAGCTGCAGCACCA[CG]AAGGCCGCCACCAGAGCCACCACGACGCGCAGCGCACGCCGGCGCTCGGGCCCCCTGGCG	CGTGGTGCTGCAGCTGCCCTACAGCCTCGCCCTGCTGCTGGATACTGCCG	CCR10	NM_016602	Body				NA	17:38085060-38086015	17:40831745-40832128	Promoter_Associated							NA	TRUE
cg01316516	0.699191	0.153336	4.07756e-07	4.15152e-05	chr11	18415964	+	chr11:18415922-18416680	Island	ACCTTACTTAGACTCCCAGCGCACGTGGAGCAGTCTGCCGGTCGGTTGTCTGGCTGCGCG[CG]CCACCCGGGCCTCTCCAGTGCCCCGCCTGGCTCGGCATCCACCCCCAGCCCGACTCACAC	CTGGGGGTGGATGCCGAGCCAGGCGGGGCACTGGAGAGGCCCGGGTGGCG	LDHA;LDHA;LDHA;LDHA;LDHA;LDHA;LDHA;LDHA;LDHA	NM_001165415;NM_001165415;NM_001135239;NR_028500;NM_005566;NM_001165416;NM_005566;NM_001165416;NM_001135239	5'UTR;1stExon;5'UTR;Body;5'UTR;5'UTR;1stExon;1stExon;1stExon	high-CpG:18372493-18372785			NA	11:18372499-18373644	11:18415827-18416180	Promoter_Associated	LDHA;LDHA;LDHA;LDHA;LDHA	ENST00000430553.2;ENST00000445376.2;ENST00000227157.4;ENST00000422447.3;ENST00000422447.3	TSS200;TSS200;TSS200;1stExon;5'UTR	LDHA;LDHA;LDHA;LDHA;LDHA;LDHA;LDHA;LDHA;LDHA	ENST00000543445.1;ENST00000469976.2;ENST00000545467.1;ENST00000535451.1;ENST00000227157.4;ENST00000422447.3;ENST00000422447.3;ENST00000478970.2;ENST00000495052.1	TSS200;TSS200;TSS200;TSS200;TSS200;1stExon;5'UTR;TSS200;TSS1500	TRUE	TRUE
cg01320263	0.414244	0.659808	8.43048e-08	1.3165e-05	chr13	98899012	+		OpenSea	AGCTTAATTTTAACCAGGTACTTACACCACAAACAGAATGACATCACTAAGCACACAGCA[CG]TTAGTGAACAGTGGCTTTGTCAGAGCTTTCTACCCAGAGCCCTGAAATGGAACATTGTTA	ATTTCAGGGCTCTGGGTAGAAAGCTCTGACAAAGCCACTGTTCACTAACG	FARP1;FARP1	NM_005766;NM_001286839	Body;Body				NA				FARP1	ENST00000376584.2	5'UTR	FARP1	ENST00000376584.2	5'UTR	NA	NA
cg01321673	0.582368	0.294245	7.94393e-06	0.000394269	chr22	50438363	+	chr22:50438257-50438776	Island	AGCCGCAGGTAGTAGTCGGGGCTCCCGGAGGCCCTGGGCACTTGCACCAGAATCGCCTTG[CG]CCTCCGGTCCACCCAGTAGCTGAGCTTCCCCGCTGCAGGAGGCGGCAAGTCGGGGCCGCG	CGCCTCCGGTCCACCCAGTAGCTGAGCTTCCCCGCTGCAGGAGGCGGCAA	IL17REL	NM_001001694	Body				TRUE	22:48779370-48780897									NA	TRUE
cg01322554	0.262665	0.463308	4.24446e-08	8.01447e-06	chr9	20603701	-		OpenSea	TGAGAGAAAAGGGTTTGCAAAAACTATAATAATCTCACAGCTGGAGATGGCTGGAAAGTC[CG]TTAGTACTCATTGTGCCCTTAATTTGCAGGAAGCCTTTGTGCTCTTCTACTCCTCGTTTT	CGGACTTTCCAGCCATCTCCAGCTGTGAGATTATTATAGTTTTTGCAAAC	MLLT3;MLLT3	NM_001286691;NM_004529	Body;Body				NA				MLLT3;MLLT3	ENST00000475957.1;ENST00000355930.6	3'UTR;5'UTR	MLLT3;MLLT3	ENST00000475957.1;ENST00000355930.6	3'UTR;5'UTR	NA	NA
cg01323312	0.355356	0.680976	2.39371e-05	0.000923628	chr7	73476657	-		OpenSea	GCTCACTGCTGACTGCTTGGCAGGCCTGAGTCAACAGACATTGCCAGGGAAACAGAGTGA[CG]TCATGTGGTGGAGCCGCGAAGGGCGCAGGCTCCCCAGCCACTTCCCGTCCCTGAAGCCCT	CGTCACTCTGTTTCCCTGGCAATGTCTGTTGACTCAGGCCTGCCAAGCAG	ELN;ELN;ELN;ELN;ELN;ELN;ELN;ELN;ELN;ELN;ELN;ELN;ELN	NM_001278918;NM_001278939;NM_001278914;NM_001081755;NM_001278913;NM_000501;NM_001081753;NM_001278917;NM_001278916;NM_001278915;NM_001081754;NM_001081752;NM_001278912	Body;Body;Body;Body;Body;Body;Body;Body;Body;Body;Body;Body;Body				NA		7:73476279-73476894	Unclassified	CTB-51J22.1	ENST00000435932.1	TSS200	CTB-51J22.1	ENST00000435932.1	TSS200	NA	NA
cg01323699	0.123267	0.253877	1.5715e-05	0.000666678	chr13	99495850	+		OpenSea	GCAACAACTTAGGAGATAACAGAACCAATTCGGAATGAGCAGGAATTGTAGGAATGCAGG[CG]AGGACTAGAAGAATCAGCTACATGCTGTTTACTGGCAAAGCAGGAGAAATGTGACTGAGG	TTCTCCTGCTTTGCCAGTAAACAGCATGTAGCTGATTCTTCTAGTCCTCG	DOCK9;DOCK9	NM_001130048;NM_015296	Body;Body				NA		13:99494195-99496101	Unclassified	DOCK9	ENST00000448493.2	3'UTR	DOCK9	ENST00000448493.2	3'UTR	NA	NA
cg01326932	0.347883	0.570929	3.13331e-06	0.000192589	chr10	22959757	-		OpenSea	TGAATCATTACAAACACTTGATTATCTCTTTGCACTAAAAATTCCTGCTATGGACAGTAA[CG]TAATTCTAGCTTTTTTTAAAAAACGGCAAATGTAAGTGTGACACTAGAAACTATAATTTG	CGTTACTGTCCATAGCAGGAATTTTTAGTGCAAAGAGATAATCAAGTGTT	PIP4K2A	NM_005028	Body				NA				PIP4K2A	ENST00000545335.1	5'UTR	PIP4K2A	ENST00000545335.1	5'UTR	NA	NA
cg01337100	0.355753	0.817251	1.53982e-08	3.84995e-06	chr18	13235829	-		OpenSea	TGCACATCCAGCCCTGGGGTGGGTTGCTTTTCTTGCAGGCTGGGTGCTGATCCTTGCCTC[CG]TTAGGAATCTGTTTGAACCTCCACCCGGAGAACAGACTGGAAGGAAATACACCAGGACAT	CGGAGGCAAGGATCAGCACCCAGCCTGCAAGAAAAGCAACCCACCCCAGG	LDLRAD4	NM_181482	5'UTR				NA				C18orf1	ENST00000399848.2	5'UTR	C18orf1	ENST00000399848.2	5'UTR	NA	NA
cg01337391	0.474024	0.140067	2.07344e-06	0.000141225	chr16	54324358	-	chr16:54317821-54324604	Island	GAAGCGACGGGGACACTTAGGGGAAAACTTTGCCAACTTCGCTCTTGGCGCGGAAGAGGC[CG]CTGGCCGGAATGGTGCAGCAGCGGCGGCGGGCCGCGACGCGCAGGGTGGGCCCCGGGCCA	CGGCCTCTTCCGCGCCAAGAGCGAAGTTGGCAAAGTTTTCCCCTAAGTGT						DMR	NA	16:52881598-52882188									NA	TRUE
cg01339103	0.351883	0.461335	1.36254e-05	0.000597111	chr1	64758157	-		OpenSea	TATCCTCATGTGCTGCATCTTGTTCTGTCTTCACTGAATAGGTGCTTAAATAATGTTTAT[CG]AATTAAATCAATGTTGGTGGTCACTTATCCTCCTTGTTGCTAAATTTTATAATGTGTGTA	CGATAAACATTATTTAAGCACCTATTCAGTGAAGACAGAACAAGATGCAG							NA										NA	NA
cg01340195	0.667887	0.845783	1.42652e-06	0.000106549	chr3	17592970	-		OpenSea	TCATCCTCATTTTCTAAATCAATAATCAGCACAGCATGCTTCATTAACAGTGACCAATCA[CG]GATGAGCTGGGGATCTCATTTTACAACATGAGCATTCCTAAGACATAAACCATCTGCTAC	TCTAAATCAATAATCAGCACAGCATGCTTCATTAACAGTGACCAATCACG	TBC1D5;TBC1D5	NM_001134381;NM_014744	5'UTR;5'UTR				NA				TBC1D5;TBC1D5;TBC1D5;TBC1D5	ENST00000446818.2;ENST00000253692.6;ENST00000429383.4;ENST00000414318.2	5'UTR;5'UTR;5'UTR;3'UTR	TBC1D5;TBC1D5;TBC1D5;TBC1D5;TBC1D5;TBC1D5;TBC1D5;TBC1D5;TBC1D5;TBC1D5;TBC1D5;TBC1D5;TBC1D5;TBC1D5;TBC1D5;TBC1D5;TBC1D5;TBC1D5;TBC1D5;TBC1D5	ENST00000443499.2;ENST00000443386.1;ENST00000497531.1;ENST00000444756.1;ENST00000486224.1;ENST00000481396.1;ENST00000434420.1;ENST00000507877.1;ENST00000446818.2;ENST00000433533.1;ENST00000253692.6;ENST00000429383.4;ENST00000446863.1;ENST00000414349.1;ENST00000412981.1;ENST00000430169.1;ENST00000452492.2;ENST00000428355.1;ENST00000415814.2;ENST00000414318.2	3'UTR;3'UTR;3'UTR;3'UTR;3'UTR;3'UTR;5'UTR;5'UTR;5'UTR;5'UTR;5'UTR;5'UTR;5'UTR;5'UTR;5'UTR;5'UTR;5'UTR;5'UTR;5'UTR;3'UTR	NA	NA
cg01340659	0.449282	0.768925	6.2034e-08	1.05363e-05	chr17	3637961	+		OpenSea	CATAGGGAGGGTGGCACTGCAGCAGAATATGGTGCCTCGGGAGGCATGGAGCCGGACTGG[CG]GGGATTTATCTAGTTATTAACCATCTGTTGGTTGGACCAGGAGGAGGCTGGAGGCAGGGG	CGGGGATTTATCTAGTTATTAACCATCTGTTGGTTGGACCAGGAGGAGGC	ITGAE	NM_002208	Body				NA				ITGAE	ENST00000571185.1	3'UTR	ITGAE;ITGAE	ENST00000571185.1;ENST00000574026.1	3'UTR;3'UTR	NA	NA
cg01341301	0.385745	0.0576647	2.0345e-05	0.000814551	chr8	81083577	+	chr8:81083320-81084057	Island	GGAGATGCAACTTGCGGCGCCGGCCCAGGAGGCTCGGCACCTGCTCGAGCCGCCGGGCCG[CG]CTCAGCCCCGCGCCGAGCCAAAGCCCGAGTCCAAGCCCGAGTCCAAGCCCGAGCCCAAGC	GCTTGGACTCGGGCTTGGACTCGGGCTTTGGCTCGGCGCGGGGCTGAGCG	TPD52;TPD52;TPD52;TPD52;TPD52;TPD52;TPD52	NR_105037;NR_105036;NR_105035;NR_105034;NM_005079;NM_001025253;NM_001287144	TSS200;TSS200;Body;Body;Body;Body;Body				NA	8:81245892-81246604	8:81082716-81084056	Promoter_Associated	TPD52	ENST00000519303.1	TSS200	TPD52;TPD52;TPD52	ENST00000519303.1;ENST00000520795.1;ENST00000519250.1	TSS200;1stExon;3'UTR	NA	NA
cg01348004	0.31524	0.0442799	2.31045e-06	0.00015307	chr15	99645227	+	chr15:99645030-99646444	Island	CCGCAGAGGCCGCGCCGGGCCGCGCTCTGATTGGCTGGAGGCCGCGGCCCTCGCCCAGGC[CG]CCCGCCCAGTCTGCCCGCCCCGTCCGCTAAGTGCCTGGGCTCTCCCGCTCGCGTCCCAGT	CGCCCGCCCAGTCTGCCCGCCCCGTCCGCTAAGTGCCTGGGCTCTCCCGC	SYNM;SYNM	NM_145728;NM_015286	TSS200;TSS200	high-CpG:97462675-97462852			NA	15:97462554-97464153	15:99645114-99646120	Unclassified	SYNM;SYNM;SYNM;RP11-654A16.3	ENST00000561323.1;ENST00000336292.6;ENST00000560674.1;ENST00000559468.1	TSS200;TSS200;5'UTR;3'UTR	SYNM;SYNM;SYNM;RP11-654A16.3	ENST00000561323.1;ENST00000328642.7;ENST00000560674.1;ENST00000559468.1	TSS200;TSS200;5'UTR;3'UTR	NA	TRUE
cg01348055	0.848201	0.585914	6.83793e-07	6.12017e-05	chr16	10272788	-	chr16:10273943-10277424	N_Shore	ACTCTCCAAGAAGGTCTCAGGGCTAGAGGCTATGGCACACAAGTACACTTACTCTTTCCT[CG]CCTTCTGAACTCCCAATCTTTTCTCAGGACTTAGAGGACAGTACACACACAACTCCAATC	GGTCTCAGGGCTAGAGGCTATGGCACACAAGTACACTTACTCTTTCCTCG	GRIN2A;GRIN2A;GRIN2A	NM_001134407;NM_000833;NM_001134408	Body;Body;Body			CDMR	NA										NA	TRUE
cg01350440	0.223944	0.0654162	4.78179e-06	0.000266519	chr11	63439155	-	chr11:63438301-63439314	Island	AGCCGCCGGGTACCTGTTGGCGGGGCGCTGAGTGCTACCGTCCTTTGGGAATTGTAGTCC[CG]CGCTCACTGGGTCCCGGCCAGCGGTCCTCATACTGCGCACTCATCTGGGGCGGGGCTTGG	CCTGTTGGCGGGGCGCTGAGTGCTACCGTCCTTTGGGAATTGTAGTCCCG	ATL3	NM_015459	TSS200				NA	11:63194878-63195890	11:63437735-63439653	Promoter_Associated	ATL3;ATL3;ATL3;ATL3;ATL3;ATL3	ENST00000398868.3;ENST00000332645.4;ENST00000538786.1;ENST00000535789.1;ENST00000538786.1;ENST00000535789.1	TSS200;1stExon;1stExon;3'UTR;5'UTR;1stExon	ATL3;ATL3;ATL3;ATL3;ATL3;ATL3;ATL3	ENST00000398868.3;ENST00000332645.4;ENST00000538786.1;ENST00000540699.1;ENST00000535789.1;ENST00000538786.1;ENST00000535789.1	TSS200;1stExon;1stExon;1stExon;3'UTR;5'UTR;1stExon	NA	TRUE
cg01350952	0.576545	0.169451	3.23166e-06	0.000196886	chr8	69242952	-	chr8:69242920-69243803	Island	AGAAGCACCTTCACCATTGGCTTTTTAAGCGGCGCTGTCGCTAGGGAGCGGCTGGTAGGG[CG]AGCAGCCTCGGGGAGCAGCCCGGGCTGTTTGTTCCGTCACCGGGGAAAGGAGGTACACAC	CGCCCTACCAGCCGCTCCCTAGCGACAGCGCCGCTTAAAAAGCCAATGGT	C8orf34;C8orf34;C8orf34-AS1	NM_001195639;NM_052958;NR_038877	TSS200;TSS200;Body				NA	8:69405364-69406465			C8orf34;C8orf34;C8orf34;C8orf34	ENST00000349492.3;ENST00000523686.1;ENST00000348340.2;ENST00000539993.1	TSS1500;TSS1500;TSS1500;TSS200	C8orf34;C8orf34;C8orf34;C8orf34	ENST00000349492.3;ENST00000523686.1;ENST00000348340.2;ENST00000539993.1	TSS1500;TSS1500;TSS1500;TSS200	NA	NA
cg01351037	0.490966	0.0639816	1.66035e-05	0.000695199	chr15	85525384	+	chr15:85523512-85525865	Island	GGCGCCGGGTGGGCCGTTTGCTGACCGGATCGCGGCTACCCGCCAGCGTGTCCGCGGCGC[CG]CCGCCAGCATGGGCTGTGCCCCGAGCATCCACATTTCCGAGCGCCTGGTGGCCGAGGACG	CCAGGCGCTCGGAAATGTGGATGCTCGGGGCACAGCCCATGCTGGCGGCG	PDE8A;PDE8A;PDE8A;PDE8A	NM_002605;NM_173454;NM_002605;NM_173454	5'UTR;5'UTR;1stExon;1stExon	high-CpG:83325617-83326521			NA	15:83324530-83327013			PDE8A;PDE8A;PDE8A;PDE8A;PDE8A;PDE8A	ENST00000394553.1;ENST00000394553.1;ENST00000339708.5;ENST00000339708.5;ENST00000310298.4;ENST00000557957.1	5'UTR;1stExon;5'UTR;1stExon;5'UTR;5'UTR	PDE8A;PDE8A;PDE8A;PDE8A;PDE8A;PDE8A;PDE8A	ENST00000394553.1;ENST00000394553.1;ENST00000485596.1;ENST00000485596.1;ENST00000559086.1;ENST00000310298.4;ENST00000557957.1	5'UTR;1stExon;5'UTR;1stExon;TSS200;5'UTR;5'UTR	NA	TRUE
cg01352021	0.594767	0.763079	5.78758e-07	5.37771e-05	chr1	54395474	+		OpenSea	TTGCCAAAGACTTTTACATAGTAAATTGCATGGAAATTATTATGTGCTTTGGAAGGGTTT[CG]AATTTGCAGTTTGAGAGAGGCCAACTGAGCTCAAGGCATTTACCTCATAATCCCCATCCT	ATGAGGTAAATGCCTTGAGCTCAGTTGGCCTCTCTCAAACTGCAAATTCG	HSPB11	NM_016126	Body				TRUE				HSPB11;HSPB11	ENST00000371376.1;ENST00000489675.1	3'UTR;TSS1500	HSPB11;HSPB11	ENST00000371376.1;ENST00000489675.1	3'UTR;TSS1500	NA	NA
cg01352546	0.28411	0.530899	1.05287e-06	8.5017e-05	chr9	129907516	-		OpenSea	TTGACTTTCAGTGTCTACAAGAGGACAGCTGCTCCATGTCTGGCACTGAGTTAAGCACTT[CG]TCGGTATTATCTCACTGTGGCCTCACAGTGGCCCTCCGAGGGAGGTGCTCTTATTCTCCC	GTCTACAAGAGGACAGCTGCTCCATGTCTGGCACTGAGTTAAGCACTTCG	RALGPS1;RALGPS1;RALGPS1;RALGPS1	NM_001190730;NM_001190729;NM_014636;NM_001190728	Body;Body;Body;Body				NA										NA	NA
cg01357003	0.684565	0.582331	1.44919e-05	0.000626054	chr21	14410329	-	chr21:14409412-14410501	Island	CTCCCAGGTCTGCTGAGTTGCGCATGCGCTGTTGCCTAACGGTTCTGCTCAGCTGCCTAA[CG]GTTCTGCTCAGCTGCCTAACGGTTTTGCGCAGCCATTTTCTCCCTGGAGAGGCTGGAGTG	CTGAGTTGCGCATGCGCTGTTGCCTAACGGTTCTGCTCAGCTGCCTAACG	C21orf99	NR_026916	TSS200				NA	21:13331284-13332449			ANKRD30BP2	ENST00000507941.1	TSS1500	ANKRD30BP2;ANKRD30BP2	ENST00000507941.1;ENST00000447861.1	TSS1500;TSS200	NA	TRUE
cg01357135	0.828765	0.488385	1.78792e-07	2.27984e-05	chr3	160475128	-	chr3:160472310-160474487	S_Shore	CAATCGGGCCAATTGACAGGAGCGCCTCGCTGGCCGCTTGTTTTCACTAGGATCTCAGAG[CG]GGACCTAGATGTCCCTGGCCTTTGCAGAGGTGGCTATGCCCGCAAAGGAGGCGGTGCTTT	TTGACAGGAGCGCCTCGCTGGCCGCTTGTTTTCACTAGGATCTCAGAGCG	PPM1L	NM_139245	Body			RDMR	NA	3:161957766-161957823									NA	TRUE
cg01357292	0.313341	0.0492048	2.52455e-07	2.92062e-05	chr3	42947771	-	chr3:42947480-42948170	Island	GTCTTACTCCGGTGGCTGCAGGGCGCAGGGTAGCCGTGTCAGGCCTGCCCAGGTGCAGAG[CG]CTCTTCCGCGACCCCAACAGCCTCTGGTCCGGTCTGGCGCGCCCTCGCTTTCCCAGAGGG	CGCTCTGCACCTGGGCAGGCCTGACACGGCTACCCTGCGCCCTGCAGCCA	ZNF662;ZNF662;ZNF662	NM_207404;NM_001134656;NM_001134656	5'UTR;1stExon;5'UTR			DMR	NA	3:42922485-42923120	3:42947283-42948125	Unclassified_Cell_type_specific	ZNF662;ZNF662;ZNF662;ZNF662;KRBOX1	ENST00000440367.2;ENST00000328199.6;ENST00000328199.6;ENST00000541208.1;ENST00000426937.1	5'UTR;5'UTR;1stExon;5'UTR;5'UTR	ZNF662;ZNF662;ZNF662;ZNF662;ZNF662;ZNF662;CCBP2;KRBOX1;KRBOX1	ENST00000440367.2;ENST00000328199.6;ENST00000328199.6;ENST00000541208.1;ENST00000475386.1;ENST00000475386.1;ENST00000487368.1;ENST00000426937.1;ENST00000451200.2	5'UTR;5'UTR;1stExon;5'UTR;1stExon;5'UTR;5'UTR;5'UTR;5'UTR	NA	TRUE
cg01358028	0.605586	0.800482	1.56591e-05	0.00066513	chr18	56660847	-		OpenSea	TGGTCTAGTATTTGCATATAATCTACATTCCCCTCTATACTTTAAATCATCTCTACAGTA[CG]TACAACACCTAATACGATATAAGAACTTGTTACACTATATTGTTTTATTTGTATTTTTAA	CGTACTGTAGAGATGATTTAAAGTATAGAGGGGAATGTAGATTATATGCA							NA										NA	NA
cg01358444	0.356206	0.697364	9.4015e-06	0.000447638	chr6	56406084	-	chr6:56407464-56407926	N_Shore	ATATCACTATTTAGTTTGAGTGCATCAAAGATCATCTTTTCATCTAGTTTGTTAGCTTCC[CG]ACCTCTCAGCTCAAATACACTGGAAGAAGTAAGGGCACCATTAGAGCATAAAGAACTAAC	CGGGAAGCTAACAAACTAGATGAAAAGATGATCTTTGATGCACTCAAACT	DST;DST;DST;DST;DST	NM_015548;NM_001144770;NM_183380;NM_001144771;NM_001144769	Body;Body;Body;Body;Body				NA				DST;DST;DST	ENST00000537444.1;ENST00000340834.4;ENST00000312431.6	TSS1500;TSS1500;3'UTR	DST;DST;DST;DST	ENST00000524186.1;ENST00000537444.1;ENST00000340834.4;ENST00000312431.6	3'UTR;TSS1500;TSS1500;3'UTR	NA	TRUE
cg01360804	0.463036	0.759461	1.69254e-05	0.000704657	chr11	47269539	+	chr11:47270234-47270633	N_Shore	CAGCACCCATATGGGAAAAGGCAGTTTAGTAGGACCCCAAGTTTTGTAGACTGCTCTAGA[CG]TCGCTCATTCTGCAGCTCATCCTGAGGAAAGGCTGGCTTCTGACCCACCTTGGTTAACTG	CGTCGCTCATTCTGCAGCTCATCCTGAGGAAAGGCTGGCTTCTGACCCAC	NR1H3;NR1H3;NR1H3;ACP2;ACP2;ACP2;ACP2;ACP2	NM_001251935;NM_001251934;NM_001130102;NM_001302489;NM_001610;NM_001302491;NM_001302490;NM_001302492	TSS1500;TSS1500;TSS1500;Body;Body;Body;Body;5'UTR				NA				NR1H3;NR1H3;NR1H3;NR1H3;ACP2	ENST00000529540.1;ENST00000395397.3;ENST00000481889.2;ENST00000407404.1;ENST00000537863.1	TSS1500;TSS1500;TSS1500;TSS1500;5'UTR	NR1H3;NR1H3;NR1H3;NR1H3;NR1H3;NR1H3;ACP2;ACP2	ENST00000495866.1;ENST00000529540.1;ENST00000395397.3;ENST00000481020.1;ENST00000436778.1;ENST00000407404.1;ENST00000534448.1;ENST00000537863.1	TSS1500;TSS1500;TSS1500;TSS1500;TSS1500;TSS1500;3'UTR;5'UTR	NA	NA
cg01362391	0.763017	0.912101	7.21219e-06	0.000365779	chr2	85658995	+		OpenSea	TACAAGTGGTCCCATCCCATCCTATCCCGCCCCATCCTTGCCTCCTGCTCTCACCATCTG[CG]CTCACCAGCCCCACTGTGCCCACAGCTGAAGGGAGCAGTGAGCCTGCCGGTGGCCGGAAA	CGCTCACCAGCCCCACTGTGCCCACAGCTGAAGGGAGCAGTGAGCCTGCC							NA				SH2D6;SH2D6	ENST00000481426.2;ENST00000389938.2	5'UTR;5'UTR	SH2D6;SH2D6;SH2D6	ENST00000481395.2;ENST00000481426.2;ENST00000389938.2	5'UTR;5'UTR;5'UTR	NA	NA
cg01363514	0.193104	0.399038	2.17458e-06	0.00014639	chr11	13483639	-	chr11:13484273-13485290	N_Shore	TGGGTTTCAGGACTGAACTTCAATCCTGGACAGGCTCTCTAATACAGAAACTCTTTTGGC[CG]TTATGGCTGCATTCTTTATTATATCTCTTATTCCGATTTCCACAGTCTCTTTCATTGAAA	CGGCCAAAAGAGTTTCTGTATTAGAGAGCCTGTCCAGGATTGAAGTTCAG	BTBD10;BTBD10	NM_001297741;NM_032320	5'UTR;5'UTR				NA				BTBD10;BTBD10	ENST00000528120.1;ENST00000278174.5	5'UTR;5'UTR	BTBD10;BTBD10;BTBD10;BTBD10;BTBD10;BTBD10;BTBD10;BTBD10	ENST00000525864.1;ENST00000528120.1;ENST00000526841.1;ENST00000527102.1;ENST00000529708.1;ENST00000278174.5;ENST00000525108.1;ENST00000527858.1	3'UTR;5'UTR;5'UTR;5'UTR;5'UTR;5'UTR;5'UTR;3'UTR	NA	NA
cg01363648	0.638955	0.754389	6.46615e-08	1.08518e-05	chr1	29589154	+	chr1:29587087-29587412	S_Shore	TAGAAATTAAACTTTATCATAGGTGTGTATGTATAGGAAAAACATAGTTTATCTAGGGTT[CG]GAACTCTCTGTGGTTTAAGGCATCCACTAGGGGTCTTGGAATGTGTCCCCTGCAGATATG	CGGAACTCTCTGTGGTTTAAGGCATCCACTAGGGGTCTTGGAATGTGTCC	PTPRU;PTPRU;PTPRU	NM_133178;NM_133177;NM_005704	Body;Body;Body				NA							PTPRU	ENST00000527027.1	5'UTR	NA	TRUE
cg01370594	0.359443	0.631501	1.19871e-06	9.36178e-05	chr20	47603732	+		OpenSea	TTAACCAAATGGACATTAGAACTCTCTATGAAGGCATAATTAGATGCTGTTTACTTTAAA[CG]TATCTCCTATGTGGACCTGGGAGCCTTGGTCTGTTTTGCTCAGTCAGTAAATATGTGACC	CGTATCTCCTATGTGGACCTGGGAGCCTTGGTCTGTTTTGCTCAGTCAGT	ARFGEF2	NM_006420	Body				NA										NA	NA
cg01371660	0.163843	0.570059	8.65749e-11	9.55721e-08	chr15	57959625	-		OpenSea	CTGCACATTTTCTCCCTTCGTGAAAGGCACATGTGCCTCCCAAGCCATTGGGTTGGTATT[CG]TTACACATATAAACACAAGGGGGTGGTGTTTGAAAGCAGGAAAACCATGGAATTTGCTTC	TCCCTTCGTGAAAGGCACATGTGCCTCCCAAGCCATTGGGTTGGTATTCG	GCOM1;GCOM1;GCOM1;GCOM1;GCOM1;MYZAP;MYZAP;GCOM1;GCOM1;GCOM1	NR_104369;NR_104371;NR_104368;NR_104370;NR_104367;NM_152451;NM_001018100;NM_001018091;NM_001018090;NM_001285900	Body;Body;Body;Body;Body;Body;Body;Body;Body;Body				NA		15:57959235-57959784	Unclassified_Cell_type_specific	POLR2M	ENST00000380563.2	5'UTR	GCOM1;POLR2M	ENST00000496627.1;ENST00000380563.2	3'UTR;5'UTR	NA	NA
cg01376829	0.216532	0.0908592	1.16794e-06	9.18895e-05	chr2	102804405	+	chr2:102803672-102804556	Island	CTGCGGGTTGTCCATCGCCCTTCCACTGTCTGTCACAGCAGGTACGTTCCGTGTGTCCTC[CG]TTCCCAGAGGCTGCCCGAGTCCACAGGCTCCTGGCCTGTCATTGGGAGCCCCCGGGGATC	CTCCCAATGACAGGCCAGGAGCCTGTGGACTCGGGCAGCCTCTGGGAACG	IL1RL2	NM_003854	Body				NA	2:102169987-102171009	2:102803961-102804734	Unclassified	IL1RL2	ENST00000481806.1	5'UTR	IL1RL2	ENST00000481806.1	5'UTR	NA	TRUE
cg01377268	0.222555	0.655518	4.75034e-08	8.70489e-06	chr2	239925497	+		OpenSea	GCAGGGGCCACGGCCCAGCCAGTCGAGCAGAACTGGAAGGATCACAGCCCAGCCCCGGCT[CG]GAATGGCCCCTCGGCAACCACCCTGAGTTACCGACAAAATGCCGACGGACTGTTTCAAAC	CGGAATGGCCCCTCGGCAACCACCCTGAGTTACCGACAAAATGCCGACGG							NA	2:239590384-239590448									NA	TRUE
cg01378062	0.814181	0.662417	2.84059e-07	3.18483e-05	chr3	88961910	+		OpenSea	CTAAAAGAAAGCAAAGGAAGGCAAGAGGAAGGGAAAAAAATTAAAGGCTTGAGGCAGTTT[CG]GTGGTACTTAGTGGTGAAAATTACTTTGGCAAATAATAGAACCCACGGCTGGTAATTACT	CGGTGGTACTTAGTGGTGAAAATTACTTTGGCAAATAATAGAACCCACGG							TRUE										NA	TRUE
cg01381797	0.252035	0.0891485	2.43674e-07	2.84868e-05	chr10	22630327	+	chr10:22629360-22630328	Island	GCGGCCAGCCGGGGCGCAATCCCCACGGGACACGCACCTAGGGGATGCGTGACCCGGACG[CG]GGCTTGGTGGGCTCTCTAGAGTCGTTTCTTATGTGGCACTTTCTGTCTTTGTCTGCTGTG	CGGGCTTGGTGGGCTCTCTAGAGTCGTTTCTTATGTGGCACTTTCTGTCT							NA	10:22669367-22670539									NA	TRUE
cg01386835	0.496658	0.643727	2.35259e-05	0.000911644	chr1	100256201	+		OpenSea	TACCTAGGAATGTGACTATAAGTTATATTTAAAATTTTAACAAACTACCAAATTATTTTC[CG]AAGTGCATCATTGCTCATTCCAACCAGCAATGTGTGAGGACTTAAATAGTTATGAAAATT	TATTTAAGTCCTCACACATTGCTGGTTGGAATGAGCAATGATGCACTTCG							NA				Y_RNA	ENST00000365384.1	TSS1500	Y_RNA	ENST00000365384.1	TSS1500	NA	NA
cg01393939	0.740517	0.86198	8.49343e-06	0.000414548	chr1	87803705	+	chr1:87800835-87801252	S_Shelf	TGTGTCGTGGATCTCAGACTAATTAGTTTTGAAATGGAGTTTTGATTGAACTCTTCAAAT[CG]ATGCTGCTGCAAAATTTGTTTCTCGGGCTTCCTATTAAAAGCCATCTTAAGGGGCAGTTT	CGATGCTGCTGCAAAATTTGTTTCTCGGGCTTCCTATTAAAAGCCATCTT	LMO4	NM_006769	Body				TRUE				LMO4	ENST00000489303.1	5'UTR	LMO4;LMO4	ENST00000495705.1;ENST00000489303.1	5'UTR;5'UTR	NA	TRUE
cg01396112	0.37969	0.0372802	7.06331e-10	4.32107e-07	chr17	26120702	+	chr17:26120369-26120944	Island	TCGGCCGGAGGATCCTGCAGAGCAGCCTGCACAGCCGGGGCCCGGCGGCCTCGCACGCCG[CG]CCCAGCCCCTCGCGCATGGCCCGGCTCCTTAGGCGCAGCTCCGCTGGCTCCACGCGCCTC	GCCAGCGGAGCTGCGCCTAAGGAGCCGGGCCATGCGCGAGGGGCTGGGCG	NOS2	NM_000625	Body				TRUE	17:23144497-23145118	17:26120512-26121078	Unclassified_Cell_type_specific							NA	TRUE
cg01396957	0.417597	0.630104	1.36841e-06	0.000103514	chr18	53168132	-		OpenSea	AAAGAATGAGCTCAAATAACAGGGCAGCAATGTGAACCTTCTTGCTGATAAATTCTCCTA[CG]TTTAGGTCAGTATGGATATTTGGGGAAAGACAAGTGATAAAGAAACAGAAAAATTCTGAC	CGTAGGAGAATTTATCAGCAAGAAGGTTCACATTGCTGCCCTGTTATTTG	TCF4;TCF4;TCF4;TCF4;TCF4;TCF4;TCF4;TCF4	NM_001243231;NM_001306207;NM_001243227;NM_001243228;NM_001083962;NM_003199;NM_001243230;NM_001243226	Body;Body;Body;Body;Body;Body;Body;Body				NA							TCF4;TCF4	ENST00000565580.1;ENST00000562847.1	5'UTR;5'UTR	NA	NA
cg01399214	0.338141	0.675796	4.56465e-09	1.67388e-06	chr16	70524458	-		OpenSea	GGGCTGGCTGGAGTTCAGACTTGCGCTAATGAAAACCCACACTGCTACATCTGAGCAGGA[CG]CTCAGATCTTGGATTGGGCAGAATGGGGAAGCAGGCTCGCCCTTTCTTCTGTGCCTGATG	GTTCAGACTTGCGCTAATGAAAACCCACACTGCTACATCTGAGCAGGACG	COG4;COG4	NM_015386;NM_001195139	Body;Body				NA							COG4;COG4;COG4;COG4;COG4	ENST00000564415.1;ENST00000530314.1;ENST00000482252.1;ENST00000526700.1;ENST00000564315.1	3'UTR;3'UTR;3'UTR;3'UTR;3'UTR	NA	NA
cg01403748	0.569933	0.342316	2.39069e-06	0.000157061	chr12	63114459	+		OpenSea	TGAGAAAGCTCCCTGACGTGGTCTTTTCCACACTCATCTCACTTACATCCTTGGTTATCA[CG]GCCTTGCCTTTGAAACCTGTGTGTGAGCTTCCATGTAAACACAATGGCTTGAGTGCTGGT	CGGCCTTGCCTTTGAAACCTGTGTGTGAGCTTCCATGTAAACACAATGGC	PPM1H	NM_020700	Body				NA				PPM1H;PPM1H	ENST00000551214.1;ENST00000551214.1	1stExon;3'UTR	PPM1H;PPM1H;PPM1H	ENST00000551214.1;ENST00000551214.1;ENST00000551519.1	1stExon;3'UTR;3'UTR	NA	NA
cg01412762	0.27571	0.723873	5.15738e-06	0.000282154	chr2	29751968	+		OpenSea	CAACCAGGAAGGCAGCAGCTGCTGTGCTTCTCCAACTGCCTTTCCCCTGCCTTCTGCCTC[CG]GGTGCTTCCAACCAGTCTGCTGCTCCTGCCCCACCCGTGCACGACAGCCGGCACCACCTG	CGGGTGCTTCCAACCAGTCTGCTGCTCCTGCCCCACCCGTGCACGACAGC	ALK	NM_004304	Body		chr2:29751731-29751731		TRUE										NA	TRUE
cg01414358	0.572714	0.228035	2.20515e-06	0.000148021	chr6	40554442	+	chr6:40554595-40555928	N_Shore	GGCTCCCCGTCTCTCCATCCGGCTCTCCAGTCTCACATGGACCCGGCTCTCCCCGCTCCC[CG]CCAGAGTTTCACCCCCACTGTAGGAAATAAAGACTAAAGAAAGGAAAGGAAATCTCTCGC	CTTTCCTTTCTTTAGTCTTTATTTCCTACAGTGGGGGTGAAACTCTGGCG	LRFN2	NM_020737	5'UTR			DMR	NA	6:40662367-40662844	6:40554120-40556159	Unclassified	LRFN2	ENST00000338305.6	5'UTR	LRFN2	ENST00000338305.6	5'UTR	NA	TRUE
cg01417946	0.52737	0.64977	9.34069e-08	1.42669e-05	chr1	117463953	-		OpenSea	GAAGCGAATATTAGCTGATTTGGTGTCTGTCCAGTGTACACTACTTTGCTTATGTTGCAG[CG]AGGAGTTAAAAAACACACACATTTTTGGTACAACTATTCGTTTTCCCATTTTCTGAAAGC	CGCTGCAACATAAGCAAAGTAGTGTACACTGGACAGACACCAAATCAGCT	PTGFRN	NM_020440	Body				NA										NA	NA
cg01418945	0.191012	0.366157	2.86648e-06	0.000180198	chr2	197953651	+		OpenSea	TCAGTTAGTAGAAAAACCAGAATGCAAGCAATTGTAGTCAGAAAGAGGTTGTCATGGAAA[CG]AATGGGAACTGCTCAAGCTTGGCAATTTTATAGGAAGAACCGTGAAGTCAAGAAGGATTT	CGAATGGGAACTGCTCAAGCTTGGCAATTTTATAGGAAGAACCGTGAAGT	ANKRD44	NM_001195144	Body				NA				ANKRD44	ENST00000477852.1	TSS200	ANKRD44;ANKRD44	ENST00000477852.1;ENST00000473081.1	TSS200;3'UTR	NA	NA
cg01422262	0.531702	0.696785	1.06074e-05	0.000491377	chr1	108506291	-	chr1:108507251-108507841	N_Shore	ATATAAAGTCCGTTCCTTCTTAAAAGGCGCTGCTCTGGTTGCTAAGTAGCTGAGGCTCTG[CG]TCATAGAGGATTAGTGCTGAAATGTGTCAGGGAGAGGGCTCTGTCCTCTCCCTTTTAAGT	CGCAGAGCCTCAGCTACTTAGCAACCAGAGCAGCGCCTTTTAAGAAGGAA	VAV3	NM_006113	Body				NA		1:108506149-108506666	Promoter_Associated	VAV3-AS1	ENST00000438318.1	TSS1500	VAV3-AS1;VAV3;VAV3	ENST00000438318.1;ENST00000530671.1;ENST00000469325.1	TSS1500;TSS200;TSS200	NA	TRUE
cg01424016	0.590272	0.889463	2.68497e-08	5.74898e-06	chr16	27541630	-		OpenSea	ACTCACATATGGCTCATTCAAAGCCACTGGCTTGTACATGGCATTTATCGTTAATCTAGC[CG]TGCCCCCAGCATCATAAAAAGACCCCATGGAAACTCATCCATCAGATCCCAGCCCTTGAC	CGGCTAGATTAACGATAAATGCCATGTACAAGCCAGTGGCTTTGAATGAG	GTF3C1;GTF3C1	NM_001520;NM_001286242	Body;Body				NA										NA	NA
cg01426208	0.306727	0.108398	1.17478e-05	0.000532189	chr6	29720641	-	chr6:29720381-29721101	Island	GCGGGGCACTCACAGCTGCCGCTATGAAAATGCAGACCTGTGGGGCAGGAATTCCGAGTC[CG]GGGTGGAGCGCGATGTGGAATCTGACTCGCTTGAAACAGCACCGCGGTGGATTCGGATCC	CAGCTGCCGCTATGAAAATGCAGACCTGTGGGGCAGGAATTCCGAGTCCG							NA	6:29828319-29829051	6:29719772-29721481	Promoter_Associated							NA	TRUE
cg01435158	0.3124	0.655714	1.29868e-08	3.39748e-06	chr12	50411091	-		OpenSea	AAATCGCCAGCTCAGCAGCACAAGAATTATTTCTGTAATACAGGGCTCTCTGCTGGGCTG[CG]TGCAGGAACTACGTCTAATAAATTTATACTAAGTAGAGGCAAAGGATTATGTTGTACCAC	CGCAGCCCAGCAGAGAGCCCTGTATTACAGAAATAATTCTTGTGCTGCTG	RACGAP1;RACGAP1;RACGAP1	NM_001126103;NM_013277;NM_001126104	5'UTR;5'UTR;5'UTR				NA				RACGAP1;RACGAP1;RACGAP1;RACGAP1;RACGAP1;RACGAP1	ENST00000551016.1;ENST00000454520.2;ENST00000427314.2;ENST00000312377.5;ENST00000547905.1;ENST00000434422.1	TSS1500;5'UTR;5'UTR;5'UTR;5'UTR;5'UTR	RACGAP1;RACGAP1;RACGAP1;RACGAP1;RACGAP1;RACGAP1;RACGAP1;RACGAP1;RACGAP1;RACGAP1;RACGAP1;RACGAP1;RACGAP1;RACGAP1;RACGAP1;RACGAP1;RACGAP1;RACGAP1;RACGAP1;RACGAP1;RACGAP1	ENST00000551016.1;ENST00000551876.1;ENST00000548320.1;ENST00000546595.1;ENST00000552157.1;ENST00000551145.1;ENST00000546786.1;ENST00000550149.1;ENST00000548247.1;ENST00000454520.2;ENST00000548824.1;ENST00000551260.1;ENST00000546723.1;ENST00000427314.2;ENST00000552310.1;ENST00000312377.5;ENST00000546764.1;ENST00000552004.1;ENST00000547905.1;ENST00000434422.1;ENST00000552921.1	TSS1500;TSS1500;5'UTR;5'UTR;5'UTR;5'UTR;5'UTR;5'UTR;5'UTR;5'UTR;5'UTR;5'UTR;5'UTR;5'UTR;5'UTR;5'UTR;5'UTR;5'UTR;5'UTR;5'UTR;5'UTR	NA	NA
cg01435308	0.485428	0.19195	1.58704e-05	0.000671467	chr18	909518	+	chr18:904578-909574	Island	GCGGCGGCGCGGGGGACGACGCGGAGCCGCTCTCCAAGCGCCACTCGGACGGGATCTTCA[CG]GACAGCTACAGCCGCTACCGGAAACAAATGGCTGTCAAGAAATACTTGGCGGCCGTCCTA	CGGACAGCTACAGCCGCTACCGGAAACAAATGGCTGTCAAGAAATACTTG	ADCYAP1;ADCYAP1	NM_001099733;NM_001117	Body;Body				NA	18:899018-899574									NA	NA
cg01436571	0.660521	0.796848	2.70045e-06	0.000172118	chr1	53628730	+		OpenSea	GTGCAAGGTTAGCAACTGCCATAATAGCAAATAGTAACAGCAAAAGATGGAAATAACCTA[CG]ATCATTCAGTGGGAATTGGTTAGTCTGTGATACATCCACACGATGACTTCATAGGGATGT	AGTCATCGTGTGGATGTATCACAGACTAACCAATTCCCACTGAATGATCG							TRUE										NA	NA
cg01439105	0.289628	0.15082	1.63465e-07	2.13864e-05	chr16	1465080	-	chr16:1463762-1464716	S_Shore	GTGTATTTTACATGAATTAATCACAAGAGTTGTATCTCAATAGAGCTGCTCTTCCACAAA[CG]AACCAAGAGGCTGATGTCAGGGGGAGCCAGGCACCGGGCGGAAGGGCCAAGGGGTCCTGG	TGAATTAATCACAAGAGTTGTATCTCAATAGAGCTGCTCTTCCACAAACG	UNKL	NM_001037125	TSS1500				NA		16:1463514-1465412	Promoter_Associated	UNKL;UNKL;UNKL;UNKL	ENST00000389221.4;ENST00000503648.1;ENST00000397462.1;ENST00000301712.5	TSS1500;TSS1500;TSS1500;TSS1500	UNKL;UNKL;UNKL;UNKL;UNKL;UNKL	ENST00000566707.1;ENST00000389221.4;ENST00000503648.1;ENST00000382757.5;ENST00000397462.1;ENST00000301712.5	TSS1500;TSS1500;TSS1500;TSS1500;TSS1500;TSS1500	NA	TRUE
cg01439696	0.762964	0.550547	6.60898e-08	1.10363e-05	chr3	51709244	+	chr3:51705062-51706022	S_Shelf	CTTAGAATGTTCAGAATGCTGAAGTCAAAAACTAATCCAGCATCACTAGCACCCTGTGAG[CG]TCTGGCTGTTCTTACAACCTATGGTGAGTCAGAGCTTGCTAATGTAACCTACTGCTATGC	GTTACATTAGCAAGCTCTGACTCACCATAGGTTGTAAGAACAGCCAGACG	TEX264;TEX264;TEX264;TEX264;TEX264;TEX264;TEX264;TEX264;TEX264	NR_024012;NR_103463;NR_103462;NM_001278195;NM_015926;NM_001129884;NM_001243727;NM_001243726;NM_001243725	Body;Body;Body;Body;Body;Body;Body;Body;Body				NA							TEX264;TEX264;TEX264	ENST00000483429.1;ENST00000489026.1;ENST00000493444.1	5'UTR;5'UTR;5'UTR	NA	NA
cg01440648	0.329717	0.653814	3.60398e-10	2.66756e-07	chr2	120165992	-		OpenSea	TCCTGGTGCTCTTCTCACCATCTAGGCAGCTGGGCATTCTGAAATGTCTCCAGGAAATGC[CG]TTGGGAGATTTCTGAGACTCTTCAATCAAACCCAGGCCTTCAGGGAGCACCCAGGTTGCA	CGGCATTTCCTGGAGACATTTCAGAATGCCCAGCTGCCTAGATGGTGAGA							NA										NA	NA
cg01441152	0.844655	0.636912	4.85055e-07	4.72372e-05	chr5	176069770	+		OpenSea	GGTCTTGGCCCCCATGGTGTGGGGCTTGGTCACAGCTGCTTCCCCAGCCCCAGGCCTGCA[CG]AAGAAGGCACTCACTAAATGCTTGCTGTTGAGGTAATCAGCCTGGCCTCTCTACCCCCAG	AGGCCAGGCTGATTACCTCAACAGCAAGCATTTAGTGAGTGCCTTCTTCG	EIF4E1B	NM_001099408	5'UTR				NA				EIF4E1B;EIF4E1B	ENST00000504597.1;ENST00000318682.6	5'UTR;5'UTR	EIF4E1B;EIF4E1B;EIF4E1B;EIF4E1B;EIF4E1B;EIF4E1B	ENST00000504597.1;ENST00000505497.1;ENST00000503895.1;ENST00000318682.6;ENST00000510660.1;ENST00000515458.1	5'UTR;TSS1500;TSS200;5'UTR;5'UTR;5'UTR	NA	NA
cg01444712	0.733604	0.619498	7.9216e-08	1.25797e-05	chr7	150210785	+		OpenSea	GAGCTCGTAGTGAGAAACGTTGGCGGAACATACTACTTCACTGGCTCTAGTGGATGGAGG[CG]ACCAGGAAAGGGTTGGCTCTTCGACCAAGTATTGATGGATACTGGTTTCAGACTTGTTTT	AAACCAGTATCCATCAATACTTGGTCGAAGAGCCAACCCTTTCCTGGTCG	GIMAP7	NM_153236	TSS1500				NA	7:149841663-149841719			GIMAP7	ENST00000313543.4	TSS1500	GIMAP7	ENST00000313543.4	TSS1500	NA	TRUE
cg01445052	0.473393	0.0877821	1.57249e-05	0.00066689	chr1	197886681	-	chr1:197887088-197887791	N_Shore	TTCCTCCCCCCGCTGCAGTTGTTTCCCATTAGTAACTCGATCTCTCAGAGCAGTAAGATT[CG]CCTTCTACGCCTCTTTTTCCCTCCGCCCGAATTGTTTGTTTTCTGCACATCTCCTTCAGG	CTGCAGTTGTTTCCCATTAGTAACTCGATCTCTCAGAGCAGTAAGATTCG	LHX9;LHX9;LHX9	NM_020204;NM_020204;NM_001014434	5'UTR;1stExon;Body				TRUE	1:196153304-196154351			LHX9;LHX9;LHX9;LHX9;LHX9	ENST00000337020.2;ENST00000337020.2;ENST00000367387.4;ENST00000367387.4;ENST00000475727.1	5'UTR;1stExon;5'UTR;1stExon;5'UTR	LHX9;LHX9;LHX9;LHX9;LHX9	ENST00000337020.2;ENST00000337020.2;ENST00000367387.4;ENST00000367387.4;ENST00000475727.1	5'UTR;1stExon;5'UTR;1stExon;5'UTR	NA	TRUE
cg01445827	0.396068	0.69629	4.52388e-08	8.40379e-06	chr1	96952956	-		OpenSea	AATATTCTCTTCCTCTTAGACAGCTACTGTAACAAAAGCCTGTAGGGAGAGCTAAAGCTT[CG]CCTGTTTACAATACCCACACACTGGCTCTCTATTTTAATTTTAAAAAACAAACTCAGAGC	CTCTTAGACAGCTACTGTAACAAAAGCCTGTAGGGAGAGCTAAAGCTTCG							TRUE										NA	TRUE
cg01447831	0.441669	0.146587	9.6459e-06	0.000456651	chr7	155249133	-	chr7:155246390-155251955	Island	ATCGGATGTTTCCAGGAATTCACACATTTCCATAAAAATGCATTTTAAATGATGGACAGG[CG]AGCCTGGGGTAACAACGGGTGTTTGGTGGGTAGACAAGAGCAAATGGGAAGGAGCCCGAG	CGCCTGTCCATCATTTAAAATGCATTTTTATGGAAATGTGTGAATTCCTG							NA				AC008060.8	ENST00000419225.1	3'UTR	AC008060.8	ENST00000419225.1	3'UTR	NA	TRUE
cg01449123	0.401642	0.600567	9.78446e-06	0.000461601	chr6	6058138	+	chr6:6058355-6058664	N_Shore	GCGCACTTACATGTGAATCAAGTATCCATTGTTATATATTTATCCGTCTGTATCAACACA[CG]TGTGGAATAAGCAAAGCAGGGGTTATTTTTTTGAAAAGCAACATTGAAAAAGCAACATTT	CGTGTGGAATAAGCAAAGCAGGGGTTATTTTTTTGAAAAGCAACATTGAA							NA										NA	NA
cg01450642	0.163565	0.0385683	1.71325e-07	2.21108e-05	chr8	54793566	-	chr8:54791845-54795141	Island	GGTGAGCAATCGCCGACGTAGAGAGGGCAGCCCTCCGCGCTGCAATATTGAGAAGGCACC[CG]CGGGACGCATGCGCACGGCGGACGGAGGCGAGCCGGCCGGGGCTTCCTCCCCGGCCGGCA	CCGACGTAGAGAGGGCAGCCCTCCGCGCTGCAATATTGAGAAGGCACCCG	RGS20;RGS20;RGS20	NM_170587;NM_003702;NM_003702	Body;5'UTR;1stExon	high-CpG:54955800-54956162		DMR	NA	8:54954253-54957694	8:54792266-54794383	Unclassified	RGS20;RGS20;RGS20;RGS20	ENST00000522225.1;ENST00000276500.4;ENST00000276500.4;ENST00000522225.1	1stExon;5'UTR;1stExon;5'UTR	RGS20;RGS20;RGS20;RGS20;RGS20;RGS20;RGS20;RGS20	ENST00000522225.1;ENST00000276500.4;ENST00000276500.4;ENST00000523064.1;ENST00000518286.1;ENST00000523414.1;ENST00000522225.1;ENST00000523064.1	1stExon;5'UTR;1stExon;1stExon;5'UTR;5'UTR;5'UTR;5'UTR	NA	TRUE
cg01454951	0.61104	0.787147	4.43574e-07	4.418e-05	chr3	71730677	+		OpenSea	CTGTCTCTGAGAGGGAGAGGGAGAGAAGGAGGAGCTGTTTACAAACAGGATGTCTGATTA[CG]GAGTTACACCAGTGGCCAGATTGGATCAGATATTTAATGCTTGATTAGGGTGGCTAGTGG	CGGAGTTACACCAGTGGCCAGATTGGATCAGATATTTAATGCTTGATTAG	EIF4E3;EIF4E3;EIF4E3;EIF4E3	NM_001134651;NM_001134649;NM_173359;NM_001134650	3'UTR;3'UTR;3'UTR;3'UTR			DMR	NA		3:71730226-71731044	Unclassified	EIF4E3;EIF4E3	ENST00000425534.2;ENST00000389826.3	3'UTR;3'UTR	EIF4E3;EIF4E3	ENST00000425534.2;ENST00000389826.3	3'UTR;3'UTR	NA	TRUE
cg01457778	0.289243	0.555329	4.50011e-08	8.37381e-06	chr2	109158267	+		OpenSea	CATCATCTTTTGTGTTTTCTTGGCAGCTGGAACAAAATTGCCGCTTCTCTCATAAAATAA[CG]AATTCCTGGAGCATTAATTTAGCCCCCGCTGTGTAGTAGGGAATTAGGGATTCAGAGCTT	CGAATTCCTGGAGCATTAATTTAGCCCCCGCTGTGTAGTAGGGAATTAGG							TRUE										NA	TRUE
cg01462126	0.511769	0.77378	2.45128e-06	0.000159861	chr8	27629386	+	chr8:27629753-27630234	N_Shore	ACTGTCTTAAGGGAATTAGCTGGGGGTTGATTTTAGGAAAGGGGAATAACAGGAACAGAA[CG]AAACCAAGTCGGGACACTGCATTTCCTGGGAACGAAGGGCACCCTTTCCTTATCTGTCAA	GAAAGGGTGCCCTTCGTTCCCAGGAAATGCAGTGTCCCGACTTGGTTTCG	CCDC25;CCDC25;CCDC25;CCDC25;CCDC25;CCDC25	NR_130762;NR_130761;NM_018246;NM_001304529;NM_001304530;NM_001304532	Body;Body;Body;Body;5'UTR;5'UTR				NA				CCDC25;CCDC25	ENST00000522915.1;ENST00000539095.1	5'UTR;5'UTR	ESCO2;CCDC25;CCDC25	ENST00000523566.1;ENST00000522915.1;ENST00000539095.1	TSS200;5'UTR;5'UTR	NA	NA
cg01466198	0.346995	0.0681648	7.74575e-08	1.24054e-05	chr8	131371142	+	chr8:131370087-131371317	Island	GGAAGCCCGAGTCCCTGGTTCGCCCCCGGAGCGGTTACTTCAGCGAGCTCGTTGCGCGAG[CG]TTTTGCAAGAAGGGGGCCCAAAAAAGTTGTACGTGTTCTTTTTTAGTCGCGTGTGGGTGC	GACTAAAAAAGAACACGTACAACTTTTTTGGGCCCCCTTCTTGCAAAACG	ASAP1	NM_018482	Body	high-CpG:131439545-131440483			NA	8:131438968-131440529	8:131370734-131371351	Promoter_Associated				ASAP1;ASAP1;ASAP1	ENST00000520927.1;ENST00000524299.1;ENST00000521075.1	3'UTR;3'UTR;3'UTR	NA	TRUE
cg01466678	0.256761	0.0816313	2.27389e-06	0.00015134	chr16	58497395	+	chr16:58497033-58498595	Island	AGCGGGTGAGAAGTCGGCGGGGGCGCGGATCGACCGGGGTGTCCCCCAGGCTCCGCGTCG[CG]GTCCCCGCTCGCCCTCCCGCCCGCCCACCGGGCACCCCAGCCGCGCAGAAGGCGGAAGCC	CTGCGCGGCTGGGGTGCCCGGTGGGCGGGCGGGAGGGCGAGCGGGGACCG	NDRG4;NDRG4;NDRG4	NM_022910;NM_001130487;NM_020465	TSS1500;TSS1500;TSS200			DMR	TRUE	16:57054598-57056276			NDRG4;NDRG4;NDRG4;NDRG4	ENST00000394282.4;ENST00000569578.1;ENST00000394279.2;ENST00000258187.5	TSS1500;TSS1500;TSS1500;TSS200	NDRG4;NDRG4;NDRG4;NDRG4;NDRG4;NDRG4;NDRG4;NDRG4;NDRG4;NDRG4;NDRG4;NDRG4;NDRG4;NDRG4;NDRG4;NDRG4;NDRG4;NDRG4;NDRG4	ENST00000569404.1;ENST00000569539.1;ENST00000564126.1;ENST00000562725.1;ENST00000565304.1;ENST00000567667.1;ENST00000394282.4;ENST00000566065.1;ENST00000569578.1;ENST00000561779.1;ENST00000565430.1;ENST00000566041.1;ENST00000566061.1;ENST00000565434.1;ENST00000394279.2;ENST00000562764.1;ENST00000258187.5;ENST00000568999.1;ENST00000564207.1	TSS1500;TSS1500;TSS1500;TSS1500;TSS1500;TSS1500;TSS1500;TSS1500;TSS1500;TSS1500;TSS1500;TSS1500;TSS1500;TSS1500;TSS1500;TSS200;TSS200;5'UTR;5'UTR	NA	TRUE
cg01469607	0.572492	0.780556	1.11076e-06	8.84599e-05	chr1	74070378	-		OpenSea	TATTCACTCTCAGAGACAACTTAGCATAATAGACAAACTTTGCCAACTTAATACCTATTT[CG]TCTGCAAAATCATTAATAAATATAGCATATAAACCATCTGCATCTCTACTCCACTGTTGT	GAGACAACTTAGCATAATAGACAAACTTTGCCAACTTAATACCTATTTCG							NA										NA	NA
cg01473685	0.322305	0.625626	5.18015e-07	4.95471e-05	chr4	53848481	+		OpenSea	CCCGAGTAGAGTTACTATGGCCAAGGGGAAACAGATCAGAATTGTGATGTAGTTTGTACA[CG]GGCTAGTTTGACTGCATAATGAATGGTAGACACATTTATTGGTAAATTGATGCAGATGTC	CGGGCTAGTTTGACTGCATAATGAATGGTAGACACATTTATTGGTAAATT	SCFD2	NM_152540	Body				NA										NA	NA
cg01475676	0.614376	0.84054	7.95511e-08	1.26015e-05	chr1	178722239	+		OpenSea	CCACCTCTGTTTACATTTGCCCTCTGTACTGTACTTGAACTACTGGTAGTCCACTGAATA[CG]AGGCACTGAATGTGCCATACTGGTTATGTGGACTTGGCAAGATCACATGACCTTGGCATT	CGAGGCACTGAATGTGCCATACTGGTTATGTGGACTTGGCAAGATCACAT	RALGPS2;RALGPS2	NM_001286247;NM_152663	5'UTR;5'UTR				NA				RALGPS2;RALGPS2;RALGPS2	ENST00000367635.3;ENST00000367634.2;ENST00000324778.4	5'UTR;5'UTR;5'UTR	RALGPS2;RALGPS2;RALGPS2;RALGPS2	ENST00000367635.3;ENST00000367634.2;ENST00000324778.4;ENST00000495034.1	5'UTR;5'UTR;5'UTR;5'UTR	NA	NA
cg01478827	0.451716	0.635375	2.1456e-08	4.87896e-06	chr1	21558579	-		OpenSea	AAACTGGCAACAGAGCCTATGCCATGTTCTGAAGGTAAAAGCCCACCTTCTTGTACATAG[CG]GGGTGTCCTGGTTGGAGGCTGGAAATGAAGGAAATAGAGATGTTTGAACCCCTATAGTCC	GAGCCTATGCCATGTTCTGAAGGTAAAAGCCCACCTTCTTGTACATAGCG	ECE1;ECE1;ECE1;ECE1	NM_001113347;NM_001113349;NM_001397;NM_001113348	Body;Body;Body;Body		chr1:21558552-21558552		NA		1:21558500-21558819	Unclassified_Cell_type_specific							NA	NA
cg01479818	0.705626	0.298026	2.80815e-06	0.000177247	chr10	103986012	-	chr10:103985852-103986246	Island	AACGCCTGGCAGGCGGGCCCTTGAGTATGACCAATCAGAATGCGGACTGCGTCCCAGGGG[CG]GAGCAGAGGCGTATCTTGGTCGAGATTGGATAGCGGCGGGGCGCAGGAAAGAGGTCGCGC	CGCCCCTGGGACGCAGTCCGCATTCTGATTGGTCATACTCAAGGGCCCGC	ELOVL3	NM_152310	TSS200				TRUE	10:103975869-103976449	10:103985568-103986679	Unclassified	ELOVL3;RP11-242B12.5	ENST00000370005.3;ENST00000556056.1	TSS200;5'UTR	ELOVL3;RP11-242B12.5	ENST00000370005.3;ENST00000556056.1	TSS200;5'UTR	NA	TRUE
cg01486506	0.882385	0.756026	2.02642e-05	0.000812386	chr16	22658553	+		OpenSea	ATCAATCAGAAGGGTAATGTTTATGTAGCATTGTTAATTGGATTTCTACAATGGGATATT[CG]GTGGGTTGGGGTTTATCTGATAACACCGTAGTCTGTGACAGCAACTTCTGTGACTCAGTG	CGGTGGGTTGGGGTTTATCTGATAACACCGTAGTCTGTGACAGCAACTTC					chr16:22658333-22658333		NA										NA	NA
cg01491186	0.619678	0.7456	1.563e-05	0.000664204	chr7	128912054	+		OpenSea	AAGCCAGATGGAGAGGCTCAGCTGAGCTCCTAGCCAACAGCTAGCATCACTTTTCAGCTA[CG]TGAGTTCCAGTTCCAGTGGGCATCATATGGAGAAAAGCCCAGGCCCTAGGCGTATGGCTC	CGTGAGTTCCAGTTCCAGTGGGCATCATATGGAGAAAAGCCCAGGCCCTA	AHCYL2;AHCYL2	NM_015328;NM_001130720	Body;Body				NA										NA	NA
cg01491219	0.790605	0.585025	4.61208e-06	0.000259538	chr1	220863513	-	chr1:220863507-220864249	Island	CATTAATTTCGTAGCAAGTGCAGTTGAAGGTGTTTTGCATGTTCATTGTGCAGTGCGCGC[CG]TAGTCTGCACAGTTTGGCCGGCAGGTGGGATGAAGGGCGGGGCTGGCGGAGCGCGCCCGC	CGGCGCGCACTGCACAATGAACATGCAAAACACCTTCAACTGCACTTGCT	C1orf115	NM_024709	TSS200				TRUE	1:218930131-218931266	1:220862984-220864239	Unclassified	C1orf115;C1orf115	ENST00000294889.5;ENST00000294889.5	5'UTR;1stExon	C1orf115;C1orf115	ENST00000294889.5;ENST00000294889.5	5'UTR;1stExon	NA	TRUE
cg01496475	0.566441	0.73441	6.70766e-07	6.03234e-05	chr1	70611550	-		OpenSea	GGAATTCGGTCTCTCAAATATTCAAGTATAGCAGCTGTTCCTTTCATTAATATGGCTGCT[CG]AGGAACTCGGAATGGATTTCCATCCAGTAGTAATGTTCTAAACAAAAGAGAGAAATTGAG	CGAGCAGCCATATTAATGAAAGGAACAGCTGCTATACTTGAATATTTGAG	LRRC40	NM_017768	Body				NA				RP4-677H15.2	ENST00000441830.1	TSS1500	RP4-677H15.2	ENST00000441830.1	TSS1500	NA	NA
cg01498907	0.621277	0.27099	2.10446e-06	0.000142758	chr10	28957650	-	chr10:28957408-28958116	Island	CTCGGGGGGAGTCTGTCCAGACTACAAGTGTCTGTGCCCCTGTTTTATTTTGAGACAAGT[CG]GGGTCGCTCAATGAGTCAGCACAGAGGAGGCAGTGGGGGAGACAGACAGCGGCTGGGACG	CTGTCCAGACTACAAGTGTCTGTGCCCCTGTTTTATTTTGAGACAAGTCG						DMR	NA	10:28997427-28998082									NA	TRUE
cg01505590	0.216594	0.0453716	4.17582e-07	4.22193e-05	chr11	2950632	-	chr11:2949788-2951756	Island	AGCACCTCGTCGGGGGATTTCATGTCGTGCCGAGCGCGGGACTGGGAGCGGCAATGCGGG[CG]GTGACGGCGCCGGCTCTGCTCCTCGTGGCCCCGGCGCGGCCTTTATAGCTGCCCCTCCCC	CGCCCGCATTGCCGCTCCCAGTCCCGCGCTCGGCACGACATGAAATCCCC	PHLDA2;PHLDA2	NM_003311;NM_003311	5'UTR;1stExon	high-CpG:2907197-2907234			NA	11:2906369-2908332			PHLDA2;PHLDA2	ENST00000314222.4;ENST00000314222.4	1stExon;5'UTR	PHLDA2;PHLDA2	ENST00000314222.4;ENST00000314222.4	1stExon;5'UTR	TRUE	TRUE
cg01505870	0.540617	0.299329	6.99531e-06	0.000357279	chr2	85107190	-	chr2:85107731-85108430	N_Shore	CCCCGCGTCGCGGGCGCACCAGAAGGATAAGCCTGGCATGGCCCTCTCCAGAGCCAGGGA[CG]CACAGATATCAAACCCACCGGAACAAATGCGCGAAATTCAACCTATGCCGCACTCAGAAG	GGCGCACCAGAAGGATAAGCCTGGCATGGCCCTCTCCAGAGCCAGGGACG	C2orf89	NM_001080824	Body				NA	2:84960327-84960773	2:85106835-85107205	Unclassified_Cell_type_specific				C2orf89;C2orf89	ENST00000436322.1;ENST00000474298.1	3'UTR;3'UTR	NA	TRUE
cg01506229	0.248007	0.570221	6.7026e-13	2.5306e-09	chr8	127888698	-		OpenSea	CTGCGGGAATCATCTCCTTTTAAATATGAGCTGCTCAATTTCGACACTGAATTCAGCTAA[CG]TATATTAACCAAGAGAAATCAAGAGTGCTTTGAATTCCCACTCAAATTCATTTGACGGCT	CGTTAGCTGAATTCAGTGTCGAAATTGAGCAGCTCATATTTAAAAGGAGA							NA		8:127888524-127889770	Promoter_Associated	PCAT1	ENST00000519319.1	5'UTR	PCAT1	ENST00000519319.1	5'UTR	NA	NA
cg01511742	0.159823	0.559167	1.30266e-13	7.21704e-10	chr3	71112437	-	chr3:71113896-71114102	N_Shore	ATCACATAAAACAGATATAGACCTTTTCTCAATTTATGCAAAGGGCATCAATTAGGACAA[CG]TGCTTCTGTCTTCAATTGATTTACTTAGTGGTCAATCTTAATAACCAAGGAAGCTTTGTA	AGATATAGACCTTTTCTCAATTTATGCAAAGGGCATCAATTAGGACAACG	FOXP1	NM_032682	Body				TRUE		3:71112179-71112898	Promoter_Associated_Cell_type_specific	FOXP1	ENST00000318796.5	5'UTR	FOXP1;FOXP1;FOXP1	ENST00000485326.2;ENST00000497553.1;ENST00000318796.5	5'UTR;5'UTR;5'UTR	NA	TRUE
cg01512164	0.100033	0.354115	2.11064e-05	0.000838154	chr5	176744759	-		OpenSea	CAGGCGGCTCTTGTTGGTCAATAGAGAGCTGTTCATAGGGCACTCACTGCCCATGTGGCC[CG]TGAAACTCCTTAGGTGGCTCTGAAGTTGCCTGTGGGGGAAGAGGCACCCACTTGGGACGG	CGGGCCACATGGGCAGTGAGTGCCCTATGAACAGCTCTCTATTGACCAAC							NA										NA	NA
cg01513659	0.253481	0.589429	8.93067e-07	7.49096e-05	chr11	85302247	-		OpenSea	TAAGAAATACTTGATCCTGCCTGACATGAAACACACAACTAATCACACTCAGTATATGGC[CG]TTTAACAAAGGGAATTATAACAATTGTTTGAGCCACATTTTATGCTCACCACTCTTGTTT	CGGCCATATACTGAGTGTGATTAGTTGTGTGTTTCATGTCAGGCAGGATC	DLG2	NM_001142699	Body				NA				DLG2	ENST00000472545.2	3'UTR	DLG2	ENST00000472545.2	3'UTR	NA	NA
cg01514341	0.827098	0.680437	5.5421e-06	0.000298316	chr16	29142291	-		OpenSea	CCAGAGGAGAGGAGTGAGCCGAGGCTGCCTGCCCATGGCCAGGGGGTCTGAGTTGGGGCA[CG]TTTCCCATTTGGTGGCCTCAGACCCTGCTGGCTGCCAACCCTTGGAATAAGCAACAGGGC	CGTGCCCCAACTCAGACCCCCTGGCCATGGGCAGGCAGCCTCGGCTCACT							NA				RP11-426C22.5	ENST00000562902.1	5'UTR	RP11-426C22.5	ENST00000562902.1	5'UTR	NA	TRUE
cg01515515	0.747254	0.864385	1.19475e-07	1.70621e-05	chr1	92414295	-	chr1:92414718-92414986	N_Shore	AATGGCCCCCAGACTTCCGCTTCAGGAAACTGGAGATCGATGGTTTTTTGGCCGGATTTG[CG]AGCAGCTTGTCAGCTGTTTTTGCCCTCCCCTTCCCATCCATCCACTGCGAATGAGTATTA	CGCAAATCCGGCCAAAAAACCATCGATCTCCAGTTTCCTGAAGCGGAAGT	BRDT	NM_207189	TSS1500				NA	1:92186840-92186884	1:92413703-92414789	Unclassified_Cell_type_specific	BRDT;BRDT	ENST00000539070.1;ENST00000394530.3	TSS1500;TSS1500	BRDT;BRDT;BRDT;BRDT;BRDT;BRDT;BRDT	ENST00000539070.1;ENST00000423434.1;ENST00000440509.1;ENST00000461218.1;ENST00000355011.3;ENST00000484833.1;ENST00000457265.1	TSS1500;TSS1500;TSS1500;TSS1500;TSS1500;TSS1500;TSS1500	NA	TRUE
cg01515896	0.470761	0.130159	8.40605e-11	9.36061e-08	chr17	77290812	+		OpenSea	CAGCGACCTGCGGGTGGGAGACGCTGCCAGCCACGCGGCCGAACTCCGGACTGGGGGCCA[CG]TGGAGGAGGCCTTGGTTCAGCTCTGCCCCATGCCTCACGGGACACACATTTATCACCTGG	TGTGTGTCCCGTGAGGCATGGGGCAGAGCTGAACCAAGGCCTCCTCCACG	HRNBP3	NM_001082575	5'UTR				NA	17:74802343-74802476	17:77290678-77290850	Unclassified_Cell_type_specific	RBFOX3;RBFOX3	ENST00000415831.1;ENST00000453134.2	5'UTR;5'UTR	RBFOX3;RBFOX3	ENST00000415831.1;ENST00000453134.2	5'UTR;5'UTR	NA	TRUE
cg01516645	0.532541	0.667604	2.59475e-06	0.000167016	chr1	28471495	+		OpenSea	GCATCCGCTGCAGCTCCACACTGTGTAACTTCTGCAATCACTTAGTCTCTCTGAGCCCCA[CG]ATCTCCTTAGTAAGATGAAGGGGTTGAACCCTCCCAGCTCCAAGATGTTCTGATTCTCTG	ACATCTTGGAGCTGGGAGGGTTCAACCCCTTCATCTTACTAAGGAGATCG							NA		1:28471493-28471555	Unclassified_Cell_type_specific	RNU7-29P	ENST00000516620.1	TSS1500	RNU7-29P	ENST00000516620.1	TSS1500	NA	NA
cg01520867	0.16651	0.034315	5.94234e-06	0.000314605	chr14	104583632	-	chr14:104583036-104584574	Island	GGGCGTCTAAGGCGTCCGGTACGGCGTCGGGGCCGGGTGGCTGCAGCAGGGCAGGGGGTG[CG]CGACCAGCGGGGATCTGGGCGCAGGGGCCGGTCCCCGGGATCCGCAGGCGACGCGGGCGG	CGTCCGGTACGGCGTCGGGGCCGGGTGGCTGCAGCAGGGCAGGGGGTGCG	MIR203	NR_029620	TSS200				NA	14:103652801-103654301			MIR203	ENST00000384836.1	TSS200	MIR203	ENST00000384836.1	TSS200	NA	TRUE
cg01521258	0.383163	0.130949	7.28693e-09	2.29841e-06	chr1	64937528	-	chr1:64935554-64936614	S_Shore	GAAGGAGGGCTGACAGAAAAACTGCCCGCAGCTAGTAAGGAATCCTGATGATGTTACTCA[CG]ACCAACAGTAGTAAAAATTGCTGAACACCAACCACCTGGAGATTCTGCCCCGCTGTTATT	ACAGAAAAACTGCCCGCAGCTAGTAAGGAATCCTGATGATGTTACTCACG	CACHD1	NM_020925	Body				NA	1:64710039-64710117									NA	TRUE
cg01526854	0.304284	0.465112	1.58745e-05	0.000671559	chr6	41900498	+		OpenSea	GGAGTGAGGAAAACAGTCAGCTGTCCTGGCCAAAGGGGTTTGGAAGGACACCAAGACCCC[CG]TTGGTGACTGAAGATGACACTGAGCTTTAATGGCTGAAGACCCAGATCAGGGCAGTGACA	GATCTGGGTCTTCAGCCATTAAAGCTCAGTGTCATCTTCAGTCACCAACG	BYSL	NM_004053	3'UTR				NA				BYSL	ENST00000230340.4	3'UTR	BYSL;BYSL	ENST00000372996.2;ENST00000230340.4	3'UTR;3'UTR	NA	TRUE
cg01529637	0.439184	0.163101	8.7389e-07	7.35816e-05	chr20	50721911	+	chr20:50721310-50721912	Island	TTACCCCCCTTCGGCCGGAACGCGCATGTCCCGGCAATTCTGCTCATCAGCCGAGCAGGG[CG]ATTTATCAAGAGTCCTGACGGCTGATTGGCCTGGAGCCAAGACCCCAGGAGTCCCGCGGA	CTGGGGTCTTGGCTCCAGGCCAATCAGCCGTCAGGACTCTTGATAAATCG	ZFP64	NM_199427	Body			DMR	NA	20:50154138-50155875			ZFP64;ZFP64;ZFP64;ZFP64	ENST00000395979.1;ENST00000371523.4;ENST00000371523.4;ENST00000477786.1	TSS1500;1stExon;5'UTR;3'UTR	ZFP64;ZFP64;ZFP64;ZFP64;ZFP64	ENST00000395979.1;ENST00000395989.3;ENST00000371523.4;ENST00000371523.4;ENST00000477786.1	TSS1500;TSS1500;1stExon;5'UTR;3'UTR	NA	TRUE
cg01530202	0.310059	0.614344	5.1312e-10	3.4176e-07	chr19	1267856	-	chr19:1265854-1269943	Island	GCAGGGGAGCTCGGTGCTGATGTCTCTCTCCTTTAATAACCACCCTGCGTGAGTGGCTGA[CG]CAGCAGCCGGCTGCCGCTGACGGGGAGTGGGGCGGCTGTAGTGGGGGGGCCCGAGGTGCA	GGTGCTGATGTCTCTCTCCTTTAATAACCACCCTGCGTGAGTGGCTGACG	CIRBP-AS1;CIRBP;CIRBP;CIRBP;CIRBP;CIRBP	NR_027271;NM_001300829;NM_001300815;NM_001280;NR_023313;NR_023312	Body;TSS1500;TSS1500;TSS1500;TSS1500;TSS1500				NA	19:1216855-1218910			CIRBP;CIRBP;CIRBP	ENST00000320936.4;ENST00000413636.2;ENST00000444172.2	TSS1500;TSS1500;TSS1500	CIRBP;CIRBP;CIRBP	ENST00000320936.4;ENST00000413636.2;ENST00000444172.2	TSS1500;TSS1500;TSS1500	NA	NA
cg01532321	0.640717	0.768331	1.53438e-05	0.000654489	chr1	21377608	-		OpenSea	AGCTGAACTATCTGATTTTTAATTGGATTTCCTACCTCACAACTTACACTAAAATAAGCA[CG]AGACTGAACAAACACTTAAAATTTTTAAAATTGAAAAAAACAGAATTCTTTAAAAATATA	CGTGCTTATTTTAGTGTAAGTTGTGAGGTAGGAAATCCAATTAAAAATCA	EIF4G3;EIF4G3;EIF4G3;EIF4G3	NM_003760;NM_001198803;NM_001198802;NM_001198801	5'UTR;5'UTR;5'UTR;5'UTR				NA				EIF4G3;EIF4G3;EIF4G3;EIF4G3;EIF4G3	ENST00000374937.3;ENST00000264211.7;ENST00000374935.3;ENST00000374927.4;ENST00000400422.1	TSS200;TSS200;TSS1500;5'UTR;5'UTR	EIF4G3;EIF4G3;EIF4G3;EIF4G3;EIF4G3;EIF4G3;EIF4G3	ENST00000374937.3;ENST00000264211.7;ENST00000374935.3;ENST00000374927.4;ENST00000400422.1;ENST00000411888.1;ENST00000438975.1	TSS200;TSS200;TSS1500;5'UTR;5'UTR;5'UTR;5'UTR	NA	NA
cg01533258	0.26147	0.0362263	1.95585e-07	2.43676e-05	chr14	95235489	-	chr14:95234612-95236569	Island	GCTTCCGCCGACAGTGCAGCTGGTTGAGAAGCTGCAGCTCGGTGCGCGACAGCGTGCCCA[CG]TTCATGTAGGGCAGCATCTGGTGCGGTACCGGGGACACCAGCACCGAACCGGGGCCCTCG	CGTGGGCACGCTGTCGCGCACCGAGCTGCAGCTTCTCAACCAGCTGCACT	GSC	NM_173849	Body			DMR	TRUE	14:94304366-94305493	14:95235458-95235682	Unclassified_Cell_type_specific							NA	TRUE
cg01534262	0.595399	0.812125	2.60633e-05	0.00098631	chr4	185853560	-		OpenSea	CATAGTGTTCAATATCAGCAATTGTAAGGAACTGTGGCTTCACCTAAAGAAATCTCTACC[CG]CAGTGCCACCCTGCCCCGTGCCGCACAGCTGCAGCCCATCCAGCCCAGCCGCAGAGCCTT	CGGGTAGAGATTTCTTTAGGTGAAGCCACAGTTCCTTACAATTGCTGATA							NA										NA	NA
cg01534316	0.662535	0.765709	3.7122e-08	7.2894e-06	chr1	112061221	+	chr1:112058184-112058590	S_Shelf	ATCACTCCCAGTTGAGAAACAGTGATCTAAACGAGAAGCCTAAAGTTCAGAGAGGCTAAG[CG]ATTTTCCCAAGGTCACAAGCCTGGCAGGCAGCAGAGATAGAATCTGAACCAAGCTTTGCC	TTCAGATTCTATCTCTGCTGCCTGCCAGGCTTGTGACCTTGGGAAAATCG	ADORA3	NM_001081976	Body				NA										NA	TRUE
cg01538610	0.621215	0.803589	1.07189e-07	1.57881e-05	chr2	95955155	+		OpenSea	ACCTGGCCCCACCTTGCCTGCTCCTTTCCACCCCTTTCTGCTCACGACCCCCATCATTCA[CG]CTCAGAATCACATGGGACTTCTGTGCAGCTGCAGAGCCAGCAAGTCCCTCCAGGTGTCAC	CGCTCAGAATCACATGGGACTTCTGTGCAGCTGCAGAGCCAGCAAGTCCC	PROM2;PROM2;PROM2	NM_001165977;NM_001165978;NM_144707	3'UTR;3'UTR;3'UTR				NA				PROM2;PROM2;PROM2;PROM2	ENST00000542147.1;ENST00000317620.9;ENST00000403131.2;ENST00000317668.4	3'UTR;3'UTR;3'UTR;3'UTR	PROM2;PROM2;PROM2;PROM2;PROM2;PROM2;PROM2	ENST00000462029.1;ENST00000542147.1;ENST00000317620.9;ENST00000403131.2;ENST00000317668.4;ENST00000487138.1;ENST00000431567.1	5'UTR;3'UTR;3'UTR;3'UTR;3'UTR;5'UTR;3'UTR	NA	NA
cg01541987	0.261548	0.0834198	1.8417e-05	0.000754013	chr14	37130936	+	chr14:37131181-37132785	N_Shore	CAAACACCCATTTTCATTGTATTTAGTCACCCAGGTGGGGAGCTAGCCTGAAAGAGACAG[CG]GAAGGAGTTTCCTGGACTGCGCTGTCGCTCACCGACCCGCACCAATCACCATGCAGCTTG	TGATTGGTGCGGGTCGGTGAGCGACAGCGCAGTCCAGGAAACTCCTTCCG	PAX9	NM_006194	5'UTR			RDMR	NA	14:36200687-36201321			RP11-964E11.3;PAX9;PAX9;PAX9	ENST00000553267.1;ENST00000402703.2;ENST00000554201.1;ENST00000361487.6	5'UTR;5'UTR;TSS1500;TSS200	RP11-964E11.3;PAX9;RP11-964E11.3;PAX9;PAX9	ENST00000553267.1;ENST00000402703.2;ENST00000555639.1;ENST00000554201.1;ENST00000361487.6	5'UTR;5'UTR;5'UTR;TSS1500;TSS200	NA	NA
cg01543452	0.610531	0.775924	5.65901e-07	5.28905e-05	chr1	81145098	-		OpenSea	TAAAACTTAATTGTGACCCTTCATAATGTTCTACATTATTTCCACAATCTATAAAATAAC[CG]TAATTAAATGACAAGAAAAATGATTCTATCAAATCACTAATTAAGTGCACTTTCTTTCAA	CGGTTATTTTATAGATTGTGGAAATAATGTAGAACATTATGAAGGGTCAC							NA										NA	NA
cg01545959	0.767131	0.873186	1.65951e-05	0.000694954	chr13	44765643	-		OpenSea	TCTCAGTGAACTAAACATCAAACTATAAGTTTTCAAGTCAGCCATGACCTGGCATCTCTC[CG]TCTTTTGAAAACGAAGCCAAACAATCTATGGTGCGGTCTCCTTAAGCTGTGTCCGAAATA	CGGAGAGATGCCAGGTCATGGCTGACTTGAAAACTTATAGTTTGATGTTT							NA		13:44765606-44766362	Unclassified	C13orf44-AS1	ENST00000437867.1	5'UTR	C13orf44-AS1	ENST00000437867.1	5'UTR	NA	NA
cg01546378	0.536423	0.243281	1.57711e-06	0.000114915	chr2	38892901	-		OpenSea	AAGATCGGTCTCACTGTAAGTCTGCTATCTGTATTTTCCCATTCTTCGTCTGATAGCCAC[CG]ACATTAATGACCAGCTCATTACATGTTGAGGTGTGGGGAGATGGGGGTAGAACCCCGTCA	CGGTGGCTATCAGACGAAGAATGGGAAAATACAGATAGCAGACTTACAGT	GALM	NM_138801	TSS200				NA		2:38892805-38893410	Promoter_Associated_Cell_type_specific	GALM;GALM	ENST00000410063.1;ENST00000272252.5	TSS1500;TSS200	GALM;GALM;GALM;GALM	ENST00000427858.1;ENST00000410063.1;ENST00000444351.1;ENST00000272252.5	TSS1500;TSS1500;TSS1500;TSS200	NA	TRUE
cg01547338	0.664922	0.294444	2.77786e-06	0.000175787	chr10	89419380	-	chr10:89419346-89420027	Island	ACGCTCTGGGACCCTCTGGGGGTGGGGCGGGCGGGGTGAACTTGACCCCAGGCCGCGTGC[CG]GGCGTGCCATCTGCCGCTCCGCTGCAAGGTCTCGCCCGGGACCGGGGCTGGCGGAGCGCG	CCTCTGGGGGTGGGGCGGGCGGGGTGAACTTGACCCCAGGCCGCGTGCCG	PAPSS2;PAPSS2	NM_001015880;NM_004670	TSS200;TSS200	high-CpG:89409332-89409605			NA	10:89409327-89410151	10:89419321-89419871	Unclassified_Cell_type_specific	PAPSS2;PAPSS2;PAPSS2;PAPSS2;PAPSS2;RP11-57C13.3	ENST00000427144.2;ENST00000482258.1;ENST00000456849.1;ENST00000361175.4;ENST00000361175.4;ENST00000354527.2	TSS1500;TSS1500;TSS200;5'UTR;1stExon;3'UTR	PAPSS2;PAPSS2;PAPSS2;PAPSS2;PAPSS2;PAPSS2;RP11-57C13.3	ENST00000465996.1;ENST00000427144.2;ENST00000482258.1;ENST00000456849.1;ENST00000361175.4;ENST00000361175.4;ENST00000354527.2	TSS1500;TSS1500;TSS1500;TSS200;5'UTR;1stExon;3'UTR	NA	NA
cg01547541	0.167786	0.0566906	5.68422e-08	9.93949e-06	chr2	211036599	-	chr2:211035478-211036637	Island	CCCGCCGCTCCACAGGCGAGTTTTAAGAGATTTCTCACAATTGTCAAGTCCGCAAGTCTC[CG]TGCGTTTGCTTTTATTTGGGCCGTGCGTTCAAATGCGCTCATAATTCTTTCTGACCCTCA	CGGAGACTTGCGGACTTGACAATTGTGAGAAATCTCTTAAAACTCGCCTG	C2orf67	NM_152519	TSS1500				NA	2:210743667-210744882			KANSL1L;KANSL1L;KANSL1L;AC006994.2	ENST00000429908.2;ENST00000418791.1;ENST00000281772.8;ENST00000412065.1	TSS1500;TSS1500;TSS1500;5'UTR	KANSL1L;KANSL1L;KANSL1L;KANSL1L;AC006994.2	ENST00000429908.2;ENST00000453904.2;ENST00000418791.1;ENST00000281772.8;ENST00000412065.1	TSS1500;TSS1500;TSS1500;TSS1500;5'UTR	NA	TRUE
cg01547915	0.340368	0.659408	6.79612e-10	4.19786e-07	chr2	38947762	+		OpenSea	TATTGCTATACAACAAATTACTCCAGCACTTCGTTTATTATCTCTAATTGTTTCTATTGG[CG]GGGAATTTAGACAGGGCACATCTTGTCTCTGCACATGATGTCTAGGGCCTCAGCTTAAAA	CGGGGAATTTAGACAGGGCACATCTTGTCTCTGCACATGATGTCTAGGGC	GALM	NM_138801	Body				TRUE							GALM	ENST00000444351.1	3'UTR	NA	TRUE
cg01549226	0.702767	0.551991	6.27731e-06	0.000328388	chr1	12893344	+		OpenSea	GTGAAAACTTGCAGGTCACATTGGGCAGGCTCCCAAATTCACCACCTGTGGAAGGTCTTT[CG]ATTGGCTTACATCCTGTCCCTGAGTAAAGAGTCTGATTGTGAGTTCATGAGTGCTTCAAA	CGATTGGCTTACATCCTGTCCCTGAGTAAAGAGTCTGATTGTGAGTTCAT							NA										NA	TRUE
cg01550348	0.379375	0.714028	2.95451e-12	7.30689e-09	chr1	85809159	+		OpenSea	CATAAACAGTTGTTACAAATTCAGAAGCTATTTGGTTTTGTGTTTTAATTTCTTAATACA[CG]CATGGCAGATTTAAAAAAATCATTGTTTTGTGGAGCTGGTGAATACAACAGCCAGATAGT	CGCATGGCAGATTTAAAAAAATCATTGTTTTGTGGAGCTGGTGAATACAA	DDAH1;DDAH1	NM_001134445;NM_012137	Body;Body				TRUE				RP11-131L23.1;DDAH1	ENST00000427819.1;ENST00000483110.1	5'UTR;3'UTR	RP11-131L23.1;RP11-131L23.1;DDAH1;DDAH1	ENST00000427819.1;ENST00000426125.1;ENST00000483110.1;ENST00000474200.1	5'UTR;5'UTR;3'UTR;3'UTR	NA	TRUE
cg01551797	0.429136	0.631824	1.33598e-05	0.000588706	chr16	1399401	-	chr16:1401334-1402348	N_Shore	CAGCCGCAAAGAGCCGAGGCTGCCAGGCCCATTTATGTCCCTCATGTCTCTAGATTTTCT[CG]TCACCCAGCCTCAAAAATATATGTGTCTGCAACCCTCAGTCTCTCTGCCGTTTCTTGATT	GCCGAGGCTGCCAGGCCCATTTATGTCCCTCATGTCTCTAGATTTTCTCG	BAIAP3;C16orf42	NM_003933;NM_001001410	3'UTR;3'UTR				NA	16:1339265-1339581			BAIAP3;BAIAP3;C16orf42	ENST00000440627.2;ENST00000397488.2;ENST00000007390.2	3'UTR;3'UTR;3'UTR	BAIAP3;BAIAP3;C16orf42;BAIAP3	ENST00000440627.2;ENST00000397488.2;ENST00000007390.2;ENST00000566162.1	3'UTR;3'UTR;3'UTR;3'UTR	NA	TRUE
cg01553004	0.513321	0.70116	2.53008e-05	0.000963686	chr14	77495672	-	chr14:77491938-77495276	S_Shore	TTTTTGTGCCCTGATCTAGGAACCCGGGCTTCAACGATAGAGCTAAATGAATTCAGAGTG[CG]CTACCCTTCCCCCCAGCCGCACTTTAAAAATTTTGGCTGAACGTCTGAAGAAGATACGAG	CGCACTCTGAATTCATTTAGCTCTATCGTTGAAGCCCGGGTTCCTAGATC	C14orf4	NM_024496	TSS1500				NA	14:76565425-76565484			IRF2BPL	ENST00000238647.3	TSS1500	IRF2BPL	ENST00000238647.3	TSS1500	NA	TRUE
cg01554339	0.650749	0.765001	6.78034e-06	0.000348541	chr19	48389767	+		OpenSea	TGAAGATGTTGAGCAATCATGAACTTATCTAGAGACCATTTTAGGGGTCATCTGAGCTTG[CG]TTCCTGAGAGTGAACTGCAAGATCGAATAACAAACACGAGGACAAATATTTTTTTTGATA	TATTTGTCCTCGTGTTTGTTATTCGATCTTGCAGTTCACTCTCAGGAACG	SULT2A1	NM_003167	TSS200				NA				SULT2A1	ENST00000222002.3	TSS200	SULT2A1	ENST00000222002.3	TSS200	NA	NA
cg01560052	0.778001	0.333613	2.35275e-11	3.47503e-08	chr7	91465543	-		OpenSea	GCAAGGATGAGTCCAATCCATAAGCAACTGGAGAAATCTGCCTCCTTTAACACAAGCAGT[CG]GGTCCCTAATCTTGCATCACAGACTTTAGGCTCTCAGCTCTTAAACAAATTCTCACAGAA	CCAATCCATAAGCAACTGGAGAAATCTGCCTCCTTTAACACAAGCAGTCG							NA				CTB-104F4.2	ENST00000454222.1	3'UTR	CTB-104F4.2	ENST00000454222.1	3'UTR	NA	NA
cg01560399	0.546597	0.0443999	1.22858e-08	3.26769e-06	chr20	10655464	-	chr20:10652573-10655611	Island	AACCGGGGGTAGAAGGCGGCGGGCACGCCGGGGCCCTGTTCAGGCTTTGGGAAGGGCCGG[CG]GAGATGCTGGTGGGCTTGGACGCCCTCCCCGGCCCGACGCCCCGGCCGCAGTGCCGGGAT	CGCCGGCCCTTCCCAAAGCCTGAACAGGGCCCCGGCGTGCCCGCCGCCTT	JAG1	NM_000214	TSS1500				NA	20:10602575-10603723	20:10655276-10656425	Unclassified	JAG1	ENST00000254958.4	TSS1500	JAG1	ENST00000254958.4	TSS1500	NA	TRUE
cg01561864	0.823287	0.515249	1.9581e-09	8.94985e-07	chr7	2679067	-		OpenSea	GTGCCCTCCCCCACCTGTTGCGGTACCCACGATGCTCCCCACAACGGGAGTTTCAGTGAC[CG]CCTCATTCCTCTTCCTGCCTCCCACAGCCTCCGAGCTCACGGGGCCAGCACTGTGGGCAC	ACCTGTTGCGGTACCCACGATGCTCCCCACAACGGGAGTTTCAGTGACCG	TTYH3	NM_025250	Body				TRUE	7:2645553-2645805									NA	TRUE
cg01568894	0.545509	0.773503	8.26185e-07	7.05072e-05	chr20	52713197	-		OpenSea	CACCACTTCTCTCTGTGTGGCTTTAAGCAAGTTACTTAAATTCCCTGCACTTCAGTTTTC[CG]TAGAGTTCATGTACATCAGTTGTCAAAGGGCAGATGTCTGGCACATTGGAAATATTACCG	CGGAAAACTGAAGTGCAGGGAATTTAAGTAACTTGCTTAAAGCCACACAG							NA		20:52713195-52714640	Unclassified							NA	NA
cg01575752	0.495165	0.61321	2.72514e-06	0.000173311	chr1	25495725	-		OpenSea	AGCAGTAAAATGAAGAGTCTGGATTCCATGAAATTGAAGGCCCCTTCAAAACGAAGTCCC[CG]TGAATGTATTTTATCCCCAAAATCCTCCTGAAAGGAATAGATAGGTAGATAGAGATGGTT	CGGGGACTTCGTTTTGAAGGGGCCTTCAATTTCATGGAATCCAGACTCTT							NA										NA	NA
cg01578654	0.351697	0.692421	3.21334e-08	6.58001e-06	chr3	8973240	-		OpenSea	CTGTCCTGGACCTGCCAGCTGCACAGATGCAGATGCTCTGCTATGCCTGTAACATCGGGG[CG]AAGTGAAAGTGGCTATTTCTACACTCAGTGTTCAGAAAACACTGAACAACAAGAATGGAT	CGCCCCGATGTTACAGGCATAGCAGAGCATCTGCATCTGTGCAGCTGGCA	RAD18	NM_020165	Body				NA				SNORA43	ENST00000362945.1	5'UTR	SNORA43	ENST00000362945.1	5'UTR	NA	NA
cg01583099	0.248646	0.118293	3.6069e-07	3.79626e-05	chr8	56792263	-	chr8:56792115-56793325	Island	CTGCTCCACTCCCCGGAGCTGCAGACTGAGTCGCCAGGTTTCTGTGCCTTCAAAGCCCTG[CG]CGACGGCCACACCAAACACCCAAACCTTGGGCAGGGACCAAACGGTCACTTCCCCGCCCT	CCGGAGCTGCAGACTGAGTCGCCAGGTTTCTGTGCCTTCAAAGCCCTGCG	LYN;LYN	NM_002350;NM_001111097	TSS200;TSS200				NA	8:56954521-56956002	8:56792137-56793171	Unclassified	LYN;LYN	ENST00000519728.1;ENST00000520220.1	TSS200;TSS200	LYN;LYN	ENST00000519728.1;ENST00000520220.1	TSS200;TSS200	NA	TRUE
cg01584202	0.851553	0.74833	6.54597e-06	0.000339182	chr13	46745445	-		OpenSea	TATAAACTGGAGTGGCCTCCTGCCTTTCCTATCATTTCTGGCTATGGGATTCCTGTATCT[CG]AGTTTCCCTGCCATCCTTTGGGGTTGCCCTTGAAGGTCAAAGCTCTGACCTCATGTTAAT	TGGCCTCCTGCCTTTCCTATCATTTCTGGCTATGGGATTCCTGTATCTCG	LCP1	NM_002298	5'UTR		chr13:46745335-46745335		TRUE				LCP1;LCP1;LCP1	ENST00000460190.1;ENST00000323076.2;ENST00000398576.1	3'UTR;5'UTR;5'UTR	LCP1;LCP1;LCP1;LCP1	ENST00000460190.1;ENST00000323076.2;ENST00000398576.1;ENST00000442275.1	3'UTR;5'UTR;5'UTR;5'UTR	NA	NA
cg01586208	0.834717	0.560265	7.52277e-07	6.579e-05	chr19	22806647	+	chr19:22805800-22806721	Island	CCGAGATGAGGAGGATCTTCTAGGAGGGGCCCCGGGGCCACAGAACGAGAGGGGAGTGTG[CG]CTGAGCCCACCTTGCAAAGACGCTCTGGTCCCCGAGGGGCGGCACCTTCGGCCTCCAGCC	CGCTGAGCCCACCTTGCAAAGACGCTCTGGTCCCCGAGGGGCGGCACCTT							NA	19:22597585-22598538									NA	TRUE
cg01586352	0.48953	0.718378	1.06508e-07	1.57132e-05	chr2	1871382	-		OpenSea	GAGGATTAGGAGAAAGTCAAGTCAGTGAATGGCAGATGCCAAGAGTGGTCCTGGCAGCCA[CG]TCCACAGGTTTCTGGGGGTGGGGGACCTCGGGGCGCTCTCTGGCTCTCCTCCAGAGAGGA	CGTGGCTGCCAGGACCACTCTTGGCATCTGCCATTCACTGACTTGACTTT	MYT1L;MYT1L	NM_001303052;NM_015025	Body;Body				NA										NA	NA
cg01590314	0.71865	0.240899	4.96526e-12	1.07396e-08	chr8	145690586	-	chr8:145690605-145692505	N_Shore	ACTCAGGGTCTAAGCTGGGGGGAACGTCAGCCCTGGGGCCCTGGAGCCCAAGTGGGAGTG[CG]GGCCTGGGGAAGAGAGAGCGGCGAGGCGCTGCAGGCCCACGCGGCGGCCTCGGCCTGCTC	AGCTGGGGGGAACGTCAGCCCTGGGGCCCTGGAGCCCAAGTGGGAGTGCG	KIFC2;CYHR1;CYHR1;CYHR1	NM_145754;NM_138496;NM_001129888;NM_032687	TSS1500;TSS200;5'UTR;5'UTR				NA	8:145661071-145663313			KIFC2;CYHR1;CYHR1;CYHR1;CYHR1;CYHR1	ENST00000301332.2;ENST00000403000.2;ENST00000403000.2;ENST00000424149.2;ENST00000306145.5;ENST00000438911.2	TSS1500;1stExon;5'UTR;5'UTR;5'UTR;TSS200	KIFC2;CYHR1;CYHR1;CYHR1;CYHR1;CYHR1;CYHR1;CYHR1;CYHR1;CYHR1	ENST00000301332.2;ENST00000524623.1;ENST00000403000.2;ENST00000526887.1;ENST00000533764.1;ENST00000403000.2;ENST00000424149.2;ENST00000530637.1;ENST00000306145.5;ENST00000438911.2	TSS1500;3'UTR;1stExon;5'UTR;5'UTR;5'UTR;5'UTR;5'UTR;5'UTR;TSS200	NA	TRUE
cg01591354	0.218472	0.509001	2.22257e-09	9.86881e-07	chrX	41640907	+		OpenSea	CCAGGGGTAATTACATCTGTTGCCAGAAACATGAGGGCAATTCTGGAGTAGCTTAGTCTA[CG]TAGCAGCTATAGAAGCAATCTCTCACCTAGCCAGTAGGTGGAACTATACACAAGTGCATT	CGTAGCAGCTATAGAAGCAATCTCTCACCTAGCCAGTAGGTGGAACTATA	CASK;CASK;CASK	NM_003688;NM_001126055;NM_001126054	Body;Body;Body				NA		X:41640765-41641100	Unclassified_Cell_type_specific				CASK	ENST00000468986.1	3'UTR	NA	NA
cg01595273	0.245799	0.729379	1.08209e-15	1.6823e-11	chr2	44942982	-		OpenSea	GGCATCTAGTGGTAGAGACCAGGGATTCCACTGAACATCCTATGTTGCTTAGGACACCCC[CG]TACAACAAAGAAACATCTGGCCCAGAATGTCAATAGTGCCAACACTGAGAAACCCTGCTC	CGGGGGTGTCCTAAGCAACATAGGATGTTCAGTGGAATCCCTGGTCTCTA	CAMKMT	NM_024766	Body				NA							CAMKMT	ENST00000477830.1	5'UTR	NA	NA
cg01597358	0.473577	0.667936	8.27571e-08	1.29773e-05	chr1	65702083	+		OpenSea	GACATGTAGAAAACACACAAAACAGAAACTCACAAATGCAAAATAGAAGTGGGTACAAAA[CG]AGGATTTGTGAAACAAGAGTTGACTGAGTACAGAAAAGAAAATGAAGGAACACACTAATC	CGAGGATTTGTGAAACAAGAGTTGACTGAGTACAGAAAAGAAAATGAAGG							NA										NA	NA
cg01597553	0.620781	0.283071	8.1385e-06	0.000401711	chr18	13219225	+	chr18:13217073-13219044	S_Shore	GGGGAAGGCGCATCCGAGAGTACAGCGTTCTTGGGTCACCTACCTGGAGGGACACCTCGT[CG]CCAGTCAGGGCAGCTAGAAGCTCTTTAAAGCAAGCAGGACTCCTTAGCTCTGCCCAGGCA	CGCCAGTCAGGGCAGCTAGAAGCTCTTTAAAGCAAGCAGGACTCCTTAGC	C18orf1;C18orf1	NM_181482;NM_181481	5'UTR;5'UTR				TRUE				C18orf1	ENST00000399848.2	5'UTR	C18orf1	ENST00000399848.2	5'UTR	NA	TRUE
cg01598757	0.137675	0.240257	2.14406e-05	0.000849196	chr3	37821244	-		OpenSea	GACTTAAAGGCATGCTCTGGTTCCCACTGGGTGGGAAATCCCTTGAATGCCCTCTGGTGG[CG]AGAAAGAACGATTGCATCTTCTTGTGGATTTCCTCTGCCTGGAATTGCCTTAGTCACCAA	CGCCACCAGAGGGCATTCAAGGGATTTCCCACCCAGTGGGAACCAGAGCA	ITGA9-AS1;ITGA9	NR_110531;NM_002207	Body;Body				NA		3:37820487-37821497	Unclassified				ITGA9;AC093415.2	ENST00000411817.2;ENST00000438136.1	TSS1500;3'UTR	NA	NA
cg01606875	0.515616	0.16072	2.93e-07	3.25988e-05	chr9	25678753	+	chr9:25677494-25678684	S_Shore	CCACCAGTGGTTACTTTGCTCTTTACACGGCATTCTCAAAACTAATGATAATAGAATGAT[CG]GTTCTGAGACAAAGCTATGGGGCAAGTTGAAAAGCTCTAAGTGCTTCATTTAAAACCCAG	CGGTTCTGAGACAAAGCTATGGGGCAAGTTGAAAAGCTCTAAGTGCTTCA	TUSC1;TUSC1	NM_001004125;NM_001004125	1stExon;5'UTR				NA				TUSC1;TUSC1	ENST00000358022.3;ENST00000358022.3	1stExon;5'UTR	TUSC1;TUSC1	ENST00000358022.3;ENST00000358022.3	1stExon;5'UTR	NA	TRUE
cg01608878	0.645855	0.510515	9.93638e-06	0.00046687	chr21	29391726	-		OpenSea	TGTTTGGGCAGTTGCAGCTGTGCCTGGGAGTGGGGCAGGACTCCTGCCTGCTCCACGGAG[CG]AGGCTGTGTATGCAGCTGTGGTTTGGGCAGCTGCAGCAGCACCCGGGGAGCTACCACCCC	CGCTCCGTGGAGCAGGCAGGAGTCCTGCCCCACTCCCAGGCACAGCTGCA	C21orf94	NR_027246	Body				NA				LINC00314	ENST00000324988.3	5'UTR	LINC00314	ENST00000324988.3	5'UTR	NA	TRUE
cg01612681	0.855688	0.717157	1.34725e-05	0.000592406	chr11	2322386	-		OpenSea	CTCCGCAGAGGGAGGGAGGCGGTGGCCTCAGCAGTTCCTCCAGCAGCGTTCCTGAGCGGG[CG]GCAGCTGGGCCCTCTTCCCACAGCCACGCTGGGGTTGCCATGCCTGCAGGTCTTGGGGCC	CGCCCGCTCAGGAACGCTGCTGGAGGAACTGCTGAGGCCACCGCCTCCCT	C11orf21;TSPAN32;C11orf21	NR_024621;NM_139022;NM_001142946	Body;TSS1500;Body				NA				C11orf21;TSPAN32;TSPAN32;TSPAN32;C11orf21	ENST00000470369.1;ENST00000182290.4;ENST00000483227.1;ENST00000381121.3;ENST00000470369.1	3'UTR;TSS1500;TSS1500;TSS1500;1stExon	C11orf21;C11orf21;TSPAN32;TSPAN32;TSPAN32;TSPAN32;TSPAN32;TSPAN32;TSPAN32;TSPAN32;TSPAN32;TSPAN32;C11orf21	ENST00000495467.1;ENST00000470369.1;ENST00000437313.1;ENST00000461200.1;ENST00000446063.2;ENST00000493924.1;ENST00000484104.1;ENST00000479508.1;ENST00000498313.1;ENST00000483227.1;ENST00000381121.3;ENST00000493948.1;ENST00000470369.1	3'UTR;3'UTR;TSS1500;TSS1500;TSS1500;TSS1500;TSS1500;TSS1500;TSS1500;TSS1500;TSS1500;TSS1500;1stExon	NA	TRUE
cg01615527	0.281603	0.603155	2.82165e-07	3.1714e-05	chr11	96160338	+		OpenSea	TTTCTCAACCCATTAAATTGTTCATCAATGCTGAACTAATACAAGAGTTACATTAATAAG[CG]GCAGGTTTAATTACTTAGCAGATGGCTGTTCAGTGTTCACCTTAATGTTATCAGACTCAG	CGGCAGGTTTAATTACTTAGCAGATGGCTGTTCAGTGTTCACCTTAATGT							NA				JRKL	ENST00000546177.1	5'UTR	JRKL	ENST00000546177.1	5'UTR	NA	NA
cg01616446	0.158712	0.50333	1.18943e-05	0.000537204	chr6	43196715	+	chr6:43196811-43197340	N_Shore	GTGGGAACTGAGCCCAAGCAAAGCAGCCCAATCTACCTTCTTTCTGTTGCACCCTACAAA[CG]CTCTGAAAGCAGCTGAAGACAGAGTTCTCCAAGAAGGAACCAAAGGTCAAGATAATGCTG	CGCTCTGAAAGCAGCTGAAGACAGAGTTCTCCAAGAAGGAACCAAAGGTC	C6orf108;C6orf108	NM_006443;NM_199184	Body;Body				NA		6:43196516-43197701	Promoter_Associated							NA	TRUE
cg01616492	0.248859	0.571175	7.49601e-12	1.49002e-08	chrX	110896134	-		OpenSea	ACTAATCAGGGAGCCTCTGGCTCAAGGGACCTGCAATGGGTTGCAGAGGATTGCACATCA[CG]TTTCACATGCAGATGAGGTTGCCATCTGGTGGATTTTCTCTAACTAAAACCTAATAACAT	CGTGATGTGCAATCCTCTGCAACCCATTGCAGGTCCCTTGAGCCAGAGGC							NA										NA	NA
cg01617516	0.795627	0.905173	1.16224e-05	0.000527535	chr20	53343339	+		OpenSea	GACTGTGGAGTAATTATAGTCTCATTGTGGTAAGAGAGTGGCTTAACCAAATGGAAAAAG[CG]ATGAATTAAGCTTAGACTGTGCAGCCCACTCTCCATTGGCCTGTCATGGCGTGCCCCCTG	CATGACAGGCCAATGGAGAGTGGGCTGCACAGTCTAAGCTTAATTCATCG							TRUE										NA	NA
cg01618938	0.608737	0.780828	2.49093e-05	0.000952754	chr3	72870430	+		OpenSea	AGGGCTCACTGGTGCCAAACAGGATGTCCCTGCTAGGAAGTTCATTGACTATAAATGTTA[CG]TGGTGTCATAACAAGCAATAACGTGCCAAGACTCTGGAGCTTCAGATTAACCACTGAAAG	CGTGGTGTCATAACAAGCAATAACGTGCCAAGACTCTGGAGCTTCAGATT	SHQ1	NM_018130	Body				TRUE		3:72870288-72870645	Gene_Associated				SHQ1	ENST00000444040.2	3'UTR	NA	NA
cg01620570	0.281963	0.0765203	6.47523e-06	0.000336538	chr17	15165908	-	chr17:15165796-15166506	Island	CGCGCGCGCGAAGCAAGGGGGCAGTGGGAGGCTCCTGGCGTTCCCCTTTAACGGGAACAA[CG]CCCTGTTTGCGTCGCTGCAGTAGGGTGTGTCCCTGGGTCAGCGTGTGCGGGAGGGCGGGA	GCAAGGGGGCAGTGGGAGGCTCCTGGCGTTCCCCTTTAACGGGAACAACG	PMP22;PMP22	NM_153321;NM_000304	TSS200;5'UTR				NA	17:15106382-15107625	17:15165781-15166098	Unclassified	PMP22;PMP22;PMP22;PMP22;PMP22	ENST00000312280.2;ENST00000426385.2;ENST00000395936.1;ENST00000395938.2;ENST00000494511.1	5'UTR;TSS200;TSS200;TSS200;3'UTR	PMP22;PMP22;PMP22;PMP22;PMP22;PMP22	ENST00000471150.1;ENST00000312280.2;ENST00000426385.2;ENST00000395936.1;ENST00000395938.2;ENST00000494511.1	3'UTR;5'UTR;TSS200;TSS200;TSS200;3'UTR	NA	TRUE
cg01625242	0.84877	0.748697	9.96671e-07	8.14686e-05	chr18	56886915	+	chr18:56887091-56887665	N_Shore	AGATCTGCAAGGAGGCAAGGTTCCAAAATCTATGGGCTGGGACAGCAAAGATGTGGCCTA[CG]AAGAGAAAGGTCTGGAGAATCAGAAGGCCTTCAAATGGTGGTTCCAAATCCCTCCAGCAA	TTTGGAACCACCATTTGAAGGCCTTCTGATTCTCCAGACCTTTCTCTTCG	GRP;GRP;GRP	NM_001012512;NM_002091;NM_001012513	TSS1500;TSS1500;TSS1500				NA				GRP;GRP	ENST00000256857.2;ENST00000529320.1	TSS1500;TSS1500	GRP;GRP;GRP	ENST00000256857.2;ENST00000529320.1;ENST00000456142.2	TSS1500;TSS1500;TSS1500	TRUE	TRUE
cg01626681	0.697406	0.382091	2.71432e-06	0.000172751	chr19	11531874	-	chr19:11533198-11533619	N_Shore	AAGTGGCAAGGGGCAGGGCGATGCGGGTGTTGTATTCGGGCAGCCTTCCCTCTAAGCTGG[CG]AGGAACTAAGCGGGGATGGGAAGCGAGAGAGGAAGGTGGGCGGGGCCAGGGGCCACCGAG	CGCCAGCTTAGAGGGAAGGCTGCCCGAATACAACACCCGCATCGCCCTGC	CCDC151	NM_145045	Body			RDMR	NA	19:11392850-11392969			CCDC151	ENST00000543934.1	ExonBnd	CCDC151	ENST00000543934.1	ExonBnd	NA	TRUE
cg01634998	0.580869	0.16362	7.42929e-06	0.000374202	chr20	44651137	-	chr20:44651066-44651369	Island	AGGAAAACTGAGTCAGGGTTGCCGAGGCAGGTGCCAGGTCAGCGGGTCCTCGGTGCCTGG[CG]GATCCTCCAATCCTCTAGCTCCCTGGAGGCTTAGCGGACAGCGACTGGGGATCCCGGGAA	CGCCAGGCACCGAGGACCCGCTGACCTGGCACCTGCCTCGGCAACCCTGA	SLC12A5	NM_001134771	Body				TRUE	20:44083456-44084986	20:44649960-44652687	Unclassified	RP11-465L10.7;RP11-465L10.10;RP11-465L10.10	ENST00000413737.1;ENST00000419897.1;ENST00000535913.1	5'UTR;TSS1500;TSS1500	RP11-465L10.7;RP11-465L10.7;RP11-465L10.10;RP11-465L10.10	ENST00000428198.1;ENST00000413737.1;ENST00000419897.1;ENST00000535913.1	5'UTR;5'UTR;TSS1500;TSS1500	NA	TRUE
cg01636316	0.219765	0.376395	2.52279e-06	0.000163689	chr1	203835280	+		OpenSea	GCTGAAAGTCCGACATCACTAATGCCTTGGTCCTTTCAGTGAGCAGCTCCCATGCTGAAA[CG]TTGTAGGGGCTGCTGGCCATCAGTCAATCATTAGCATACAAAAAGGCAACATCTTAGAGA	CGTTGTAGGGGCTGCTGGCCATCAGTCAATCATTAGCATACAAAAAGGCA	SNRPE;SNRPE;SNRPE	NR_130746;NM_003094;NM_001304464	Body;Body;Body				NA				SNRPE	ENST00000483099.1	5'UTR	SNRPE;SNRPE;SNRPE	ENST00000483099.1;ENST00000475035.1;ENST00000470492.1	5'UTR;5'UTR;5'UTR	NA	NA
cg01640437	0.58332	0.0976105	4.40582e-07	4.39595e-05	chr11	65405484	-	chr11:65408344-65408631	N_Shelf	GAGGAAATGGCCTTAGAATGAGCACTGCTCGGTGCTGACCTCCGCCAGGCCTGGAATCCC[CG]CTGCTGCGCTTCCCGCCGCAGACAGCTCCCGGCCGGCCCCGCCTCCCGGCATGGCCCCGC	CGGGGATTCCAGGCCTGGCGGAGGTCAGCACCGAGCAGTGCTCATTCTAA	SIPA1	NM_006747	TSS200				TRUE	11:65162042-65162387	11:65404865-65406474	Promoter_Associated	SIPA1	ENST00000534313.1	TSS200	SIPA1;SIPA1;SIPA1	ENST00000534313.1;ENST00000533361.1;ENST00000526137.1	TSS200;TSS200;TSS200	NA	TRUE
cg01642548	0.777019	0.511856	7.79689e-07	6.75485e-05	chr15	63729039	-		OpenSea	CCGTGAGAGGAGTGTTGAGAAACACACTTCTAGGGGGTTCTGCTGTCCCCTACAGACCAG[CG]CTCAGTCATTCCTCCTGGATCTAGCTCTGGTATGGCTTTGCAGGCTTCACTCACAGTCTT	CGCTGGTCTGTAGGGGACAGCAGAACCCCCTAGAAGTGTGTTTCTCAACA	LOC102723344	NR_120375	Body				TRUE		15:63728630-63729407	Unclassified_Cell_type_specific	RP11-321G12.1	ENST00000559821.1	5'UTR	RP11-321G12.1	ENST00000559821.1	5'UTR	NA	NA
cg01642901	0.787024	0.612118	9.56809e-06	0.000453641	chr4	170190012	+	chr4:170191357-170192844	N_Shore	ACCTCTGTAGGCTACTTACCCTCACTGGGGGGCTCCAGGATTGCACCCGAGGCTGCTGTC[CG]CCCTGGGAGCTCTGCAGATCTTTTGAGCTACAATTAGCCACAGTGCTGCTCTGAGACCTT	CGCCCTGGGAGCTCTGCAGATCTTTTGAGCTACAATTAGCCACAGTGCTG	SH3RF1	NM_020870	Body				NA				SH3RF1;SH3RF1	ENST00000508685.1;ENST00000508685.1	1stExon;3'UTR	SH3RF1;SH3RF1	ENST00000508685.1;ENST00000508685.1	1stExon;3'UTR	NA	TRUE
cg01643835	0.421485	0.687433	5.92207e-08	1.02154e-05	chr6	38676382	-		OpenSea	AAGAATACACATAGCACAATACCATTTTTGCAAAGCTTAAAAATATGCAGAATGACATAA[CG]TATTGCCTAGGACTAAATACACATCTAGTAATGGTACAGGAAGTGCCTGGGAATAAACAA	AGCACAATACCATTTTTGCAAAGCTTAAAAATATGCAGAATGACATAACG							NA										NA	NA
cg01649597	0.406666	0.0587188	3.0067e-07	3.32594e-05	chr2	232395061	+	chr2:232394763-232395337	Island	CGACCCTGCCCGCACCGAGCCCCGGCCCAGCTGCCGCGCCCTAGCCCACGCCGGCGCCTG[CG]CACCTACCATGCGGCCCGCGGCCCGCGAGACCCCGGCTTCCACCCTCCGAGCGACGGACA	GGAGGGTGGAAGCCGGGGTCTCGCGGGCCGCGGGCCGCATGGTAGGTGCG	NMUR1	NM_006056	Body				NA	2:232103024-232103727	2:232394920-232396293	Unclassified							NA	TRUE
cg01649713	0.557405	0.696227	6.50461e-06	0.000337725	chr1	78407849	+		OpenSea	CAAATGGCTAAGGCAAGAGAAGAAGAAGAACAAAGAAGAATTGAAGAACAAAAGTTACTA[CG]CATGCAGTTTGAACAAAGGGAAATTGATGCAGCACTACAAAAGGTACCAGGCTTATGTAT	CGCATGCAGTTTGAACAAAGGGAAATTGATGCAGCACTACAAAAGGTACC	NEXN;NEXN	NM_001172309;NM_144573	Body;Body				NA				NEXN	ENST00000480732.1	5'UTR	NEXN;NEXN;NEXN	ENST00000470735.1;ENST00000470735.1;ENST00000480732.1	1stExon;5'UTR;5'UTR	NA	NA
cg01650747	0.641354	0.804771	4.20841e-06	0.000242439	chr6	157212279	+		OpenSea	CATTATTTTTGACTGGACATGTTGACATAATAAAATTTCCTTGTGCAATTGGTTCAACCA[CG]CATCAGCTTAGCATCTGAATTTCTTGCTGTGGGGAATTTTCAGTCTGTCTCTTATGCATG	CGCATCAGCTTAGCATCTGAATTTCTTGCTGTGGGGAATTTTCAGTCTGT	ARID1B;ARID1B	NM_020732;NM_017519	Body;Body				NA				ARID1B;ARID1B	ENST00000354354.3;ENST00000535255.1	5'UTR;5'UTR	ARID1B;ARID1B	ENST00000354354.3;ENST00000535255.1	5'UTR;5'UTR	NA	NA
cg01654404	0.588056	0.696131	1.23483e-06	9.57375e-05	chr1	6879537	-		OpenSea	CCTTGATTTACTTGCCATGCCATAATACTAGTTGGCGCTCTGCACATTTTTTGGGTGAGT[CG]GGTGTTGGGTTTATTGTTGGGAAATGGTTAAAAATGTTGTTGGTGTTGACTGAGCTTCAA	TGCCATGCCATAATACTAGTTGGCGCTCTGCACATTTTTTGGGTGAGTCG	CAMTA1;CAMTA1;CAMTA1;CAMTA1	NM_001195563;NR_038934;NM_001242701;NM_015215	Body;Body;Body;Body				NA				CAMTA1	ENST00000476163.1	5'UTR	CAMTA1;CAMTA1	ENST00000490738.1;ENST00000476163.1	5'UTR;5'UTR	NA	NA
cg01659725	0.590871	0.812413	9.58001e-07	7.89857e-05	chr11	102238207	-		OpenSea	CTCATTCCTTGTTATTTAAATCTTTGTTCTGGTGCCATTTCTTCGGACACGGATTCCACG[CG]TGTTTGAACAAGAGGGGACATTGTTGACGTTGTATATTTATTATAAGTTTCCAGAAGATG	CGCGTGGAATCCGTGTCCGAAGAAATGGCACCAGAACAAAGATTTAAATA	BIRC2;BIRC2;BIRC2	NM_001166;NM_001256163;NM_001256166	Body;Body;Body				NA		11:102238000-102238448	Gene_Associated_Cell_type_specific	BIRC2	ENST00000527910.1	5'UTR	BIRC2;BIRC2;BIRC2	ENST00000531259.1;ENST00000527910.1;ENST00000534130.1	5'UTR;5'UTR;5'UTR	NA	NA
cg01660911	0.363938	0.0409188	4.91218e-10	3.34525e-07	chr22	17082772	+	chr22:17083384-17083628	N_Shore	CCCGGAGGCCGGCGCCCCTCACGCCGCCCGCCCGCCCGCTCCCCGCCCGGCCCCTGCGCG[CG]TGCGTGTCCTGCTCGCTCCATGTTGCCGCCTCTCCCGGTACCTGCTGCTGCTCCCGGGGC	GCAGCAGGTACCGGGAGAGGCGGCAACATGGAGCGAGCAGGACACGCACG	psiTPTE22	NR_001591	TSS200				NA	22:15461937-15463628			TPTEP1;TPTEP1;TPTEP1	ENST00000558085.1;ENST00000400593.2;ENST00000426585.1	TSS200;TSS200;TSS200	TPTEP1;TPTEP1;TPTEP1	ENST00000558085.1;ENST00000400593.2;ENST00000426585.1	TSS200;TSS200;TSS200	NA	TRUE
cg01663383	0.722281	0.823319	1.11383e-07	1.62223e-05	chr19	34676534	-		OpenSea	GTAAAAAACCCAGAGTCACCTTTCTACCATGCTACCTTCAGGGCCTGAGCAAGAGTACTG[CG]TTGTAGAAGAGGTGGTGCTTTTTAGTATTTAAGTAATTAAACCTTCCTTGTTGTATTAAA	CGCAGTACTCTTGCTCAGGCCCTGAAGGTAGCATGGTAGAAAGGTGACTC	LSM14A;LSM14A	NM_001114093;NM_015578	Body;Body				NA										NA	NA
cg01664670	0.54227	0.0324085	7.64494e-09	2.36566e-06	chr20	39316308	+	chr20:39316039-39316322	Island	GGACCTCCCACCCTCTCGTCTCTCTCTCCGGCTCTGCTCGAGTCTAGGAGGCGGCGCTGG[CG]TGCGCTACTCTCGCCTTAGCCAAGGTCCCCTGCCCGCCCGCGCACCCGCCCGTCGCCCGC	CGGGTGCGCGGGCGGGCAGGGGACCTTGGCTAAGGCGAGAGTAGCGCACG	MAFB;MAFB	NM_005461;NM_005461	3'UTR;1stExon			DMR	TRUE	20:38749362-38752944			MAFB;MAFB;MAFB	ENST00000373313.2;ENST00000373313.2;ENST00000396967.1	3'UTR;1stExon;3'UTR	MAFB;MAFB;MAFB	ENST00000373313.2;ENST00000373313.2;ENST00000396967.1	3'UTR;1stExon;3'UTR	NA	TRUE
cg01668452	0.368682	0.0892339	2.40113e-06	0.000157525	chr1	212780991	+	chr1:212780151-212783086	Island	CTGCGGGTTCCGCCTGTGGTCATTGCGTCCCCATTCCGGGCCGTCCGGTCCCAGTCCAAT[CG]GCTCTGGGAGCAGAAGAACACGTGAAAGCTGAACATGGGTTTTCCCTAAATATTGCCTGA	CGGCTCTGGGAGCAGAAGAACACGTGAAAGCTGAACATGGGTTTTCCCTA	ATF3;ATF3;ATF3	NM_001674;NM_001040619;NM_001030287	TSS1500;TSS1500;5'UTR				NA	1:210846786-210847808	1:212779717-212780993	Unclassified_Cell_type_specific	ATF3;ATF3;ATF3	ENST00000341491.4;ENST00000366985.1;ENST00000366987.2	TSS1500;TSS1500;5'UTR	ATF3;ATF3;ATF3;ATF3	ENST00000465155.1;ENST00000366985.1;ENST00000366981.4;ENST00000366987.2	TSS1500;TSS1500;5'UTR;5'UTR	NA	TRUE
cg01668604	0.271416	0.497522	1.99276e-06	0.000137047	chr14	74791810	-		OpenSea	TTTCAGGATAAAACTAAAATACTACAGGATTCAGTCAAACAGCCCTGGCTGCAGGTTTTT[CG]CATCTTGGGAACAATGGAGGGCCTAATAAAGTCCTGGGGAGTGCACTGGTCAAGGCAAGG	ACTAAAATACTACAGGATTCAGTCAAACAGCCCTGGCTGCAGGTTTTTCG							NA		14:74791625-74792888	Unclassified				VRTN	ENST00000557177.1	5'UTR	NA	NA
cg01679473	0.435	0.566547	9.62597e-06	0.000455892	chr16	1414013	-	chr16:1414417-1414851	N_Shore	TCCCAGAAAGAGCAGAGCAGCTGGCAGACTAGAGCTCAGCTGCTCCTGACCACTGACAAC[CG]GGAGATGTCTCGGCAGACACCACTTATCCCAGAAAAGACCAGAGGCTCCAAATGGGAACC	CAGAGCAGCTGGCAGACTAGAGCTCAGCTGCTCCTGACCACTGACAACCG	UNKL	NM_023076	3'UTR				NA		16:1413158-1414407	Gene_Associated	UNKL;UNKL	ENST00000391893.2;ENST00000248104.7	3'UTR;3'UTR	UNKL;UNKL	ENST00000391893.2;ENST00000248104.7	3'UTR;3'UTR	NA	TRUE
cg01684884	0.477643	0.0409314	6.35732e-07	5.78577e-05	chr2	75185594	-	chr2:75185567-75186177	Island	GGCACCAATGGGAGGTGCCTGGGCTCCACAGGCCCGTCGGGGCCAGAGGGTCGCCGGTAG[CG]TCAACCAAGTGCACGACAGCCCACGGGTGGCTAGGCGCGTGGGAAGAGCCGGAGCCCGAC	CGCTACCGGCGACCCTCTGGCCCCGACGGGCCTGTGGAGCCCAGGCACCT	POLE4	NM_019896	TSS200				TRUE	2:75039076-75039659	2:75185168-75186839	Promoter_Associated	POLE4;POLE4	ENST00000459636.1;ENST00000483063.1	TSS1500;TSS200	POLE4;POLE4;POLE4;POLE4;POLE4;POLE4	ENST00000485527.1;ENST00000459636.1;ENST00000233699.4;ENST00000465242.1;ENST00000473023.1;ENST00000483063.1	TSS1500;TSS1500;TSS1500;TSS1500;TSS1500;TSS200	NA	NA
cg01686861	0.728577	0.550912	4.89802e-06	0.000271362	chr16	60748	-		OpenSea	GGGCGGGGGTTGGGGGGGCGTGTGTTGCAGGAGCAAAGTCGCACGGCGCCGGCCTGGGGG[CG]GGGGGTGGGGGGCGCCGTTGCACGCGCAGAAACTCACGTCACGGTGGCGCGGCGCAGAGA	CGCCCCCAGGCCGGCGCCGTGCGACTTTGCTCCTGCAACACACGCCCCCC							NA	16:262-982			Z84812.3	ENST00000513886.1	TSS1500	Z84812.3	ENST00000513886.1	TSS1500	NA	TRUE
cg01688536	0.550177	0.112196	1.46514e-07	1.9702e-05	chr7	35296968	-	chr7:35296921-35298218	Island	GTCCAGGAAGTAATCGGTTTCCGGCTTTTGGACAATGGTCCCTCGCTTAACGAATGCTAA[CG]AATGCTCCCTTAGCTGGGAGCTGCAGGGACCGGTCCCGGCAGGTCTAACCAACCGTCCGC	ATCGGTTTCCGGCTTTTGGACAATGGTCCCTCGCTTAACGAATGCTAACG						CDMR	NA	7:35263447-35264738									NA	TRUE
cg01691592	0.293263	0.565725	8.12526e-06	0.000401213	chr12	25801556	-		OpenSea	TAAGCTTCTTCTGTTATGCTCAGCCCCGGAGATCTGGCACACAGAGCCATAGTAACAATG[CG]TTCAGCCAGGTTTCCTTAGCTACACACTAGTGACAGGACAGGACGCTGCCCTAAAGTGCC	CGCATTGTTACTATGGCTCTGTGTGCCAGATCTCCGGGGCTGAGCATAAC	LMNTD1	NM_001145727	TSS200				TRUE				IFLTD1	ENST00000445693.1	TSS200	IFLTD1;IFLTD1;IFLTD1;IFLTD1	ENST00000540106.1;ENST00000445693.1;ENST00000545543.1;ENST00000542224.1	TSS200;TSS200;TSS200;TSS200	NA	NA
cg01692233	0.65836	0.14946	1.2018e-11	2.13008e-08	chr18	76738717	+	chr18:76737005-76741244	Island	TCACCGCCCGCTTCCCCCAGCGAACGACTCGGGGAAGCTCCAGGAGGCCATCTGTGCTGA[CG]GTTCACACCAGACAGGACCACTTGCAAGGACAAAAATAAGAAATTTAGGAAACGAAAAAA	CGGTTCACACCAGACAGGACCACTTGCAAGGACAAAAATAAGAAATTTAG							NA	18:74839381-74842350			RP11-849I19.1;RP11-849I19.1;RP11-849I19.1;RP11-849I19.1	ENST00000575722.1;ENST00000572007.1;ENST00000573860.1;ENST00000575722.1	3'UTR;TSS1500;3'UTR;1stExon	RP11-849I19.1;RP11-849I19.1;RP11-849I19.1;RP11-849I19.1	ENST00000575722.1;ENST00000572007.1;ENST00000573860.1;ENST00000575722.1	3'UTR;TSS1500;3'UTR;1stExon	NA	TRUE
cg01695510	0.220258	0.393176	3.57697e-07	3.7756e-05	chr3	150886304	-		OpenSea	GGTGCGTGCCACCAGAGGGCGACATGTGCTCAGGACTGAGAGTCCTGGAGGCTCTAGGCA[CG]CACATTTCTGGAAGGGCCATCAGTGTTGCCCCATTTAGCAGTAATTATTTTGAATGTTGA	CAGAGGGCGACATGTGCTCAGGACTGAGAGTCCTGGAGGCTCTAGGCACG	MED12L	NM_053002	Body				NA		3:150885662-150886443	Unclassified							NA	NA
cg01701415	0.0657406	0.45251	2.71517e-06	0.00017278	chr10	74870311	+		OpenSea	GAACGTGAACATTTGGAGTTTCCTCTTTTGTGCTGATTCCTGAGGACTAGGAAGGTGCCC[CG]AAAAGAATTCAGAGTGAGTACAGTGAAACAGAAACCTGCTCAGCTTCTAAGTGCAGGAAG	AGAAGCTGAGCAGGTTTCTGTTTCACTGTACTCACTCTGAATTCTTTTCG	NUDT13;NUDT13	NM_015901;NM_015901	5'UTR;1stExon				NA		10:74869980-74870376	Promoter_Associated_Cell_type_specific	NUDT13;NUDT13;NUDT13;NUDT13;NUDT13;NUDT13;NUDT13;NUDT13	ENST00000488223.1;ENST00000357321.4;ENST00000537969.1;ENST00000372997.3;ENST00000372997.3;ENST00000488223.1;ENST00000544879.1;ENST00000537969.1	1stExon;5'UTR;1stExon;1stExon;5'UTR;5'UTR;5'UTR;5'UTR	NUDT13;NUDT13;NUDT13;NUDT13;NUDT13;NUDT13;NUDT13;NUDT13;NUDT13;NUDT13	ENST00000349051.5;ENST00000349051.5;ENST00000469925.1;ENST00000537969.1;ENST00000372997.3;ENST00000372997.3;ENST00000488223.1;ENST00000469925.1;ENST00000544879.1;ENST00000537969.1	1stExon;5'UTR;1stExon;1stExon;1stExon;5'UTR;5'UTR;5'UTR;5'UTR;5'UTR	NA	TRUE
cg01702190	0.720839	0.825599	7.27126e-06	0.00036816	chr2	105561354	+		OpenSea	TCTTAATAATTTTTGCAATATAAACCTCTTTTTTTTTGAGCAACACAGTTTTTCAGTGAA[CG]TGGATGGAGCAATTATTTTTGTCAAGGACAGATATTTTCCGGACACAAAATACAGCTTCA	CGTGGATGGAGCAATTATTTTTGTCAAGGACAGATATTTTCCGGACACAA	LOC102724691	NR_110603	Body				NA				AC010884.1	ENST00000456519.1	3'UTR	AC010884.1	ENST00000456519.1	3'UTR	NA	NA
cg01702513	0.228716	0.385715	6.10975e-06	0.000321718	chr10	131988212	-	chr10:131988211-131989332	Island	GGGTCGGGTCCCTGTCCTGGGTCCCAGAGTGCCCTGGACGTTGGGGCTGCAGGGACACCC[CG]GGGCCAGCGACGGCAGGTGATGTCCAGGGCCCCGCGCCAACTGGGAGCTTTGCTGCCGCT	TGTCCTGGGTCCCAGAGTGCCCTGGACGTTGGGGCTGCAGGGACACCCCG							NA	10:131877935-131879378	10:131987884-131989425	Promoter_Associated							NA	TRUE
cg01705342	0.416331	0.713639	2.90483e-07	3.23808e-05	chr17	72683111	-		OpenSea	GGCAGTATAGCTGAGATCAGGGCCTGTGACCTGTTGCTTCTTTGTCGTGGAAACCCTCTG[CG]TCATTGATAGAGGGCAGCATTCTGCATGTAAATGCCAACAAGTGCCAGTGCTCTGCTCTG	CGCAGAGGGTTTCCACGACAAAGAAGCAACAGGTCACAGGCCCTGATCTC	RAB37	NM_175738	Body				NA										NA	NA
cg01706592	0.733319	0.851133	1.70225e-05	0.000707543	chr1	246168678	-		OpenSea	TTCTCACAGTAGCAAAGCAAACGCTTACAGCTGGAAGACCATCACATATGGTGGAGCCAA[CG]CTGTACTTGGAACTGGATTTGATTTTCAATCCTGGTTTCTCAATTAACTAGCTCTCTGAC	CAAAGCAAACGCTTACAGCTGGAAGACCATCACATATGGTGGAGCCAACG	SMYD3;SMYD3	NM_022743;NM_001167740	Body;Body				NA							SMYD3;SMYD3;SMYD3	ENST00000464398.1;ENST00000391836.2;ENST00000492487.1	3'UTR;5'UTR;3'UTR	NA	NA
cg01706789	0.294397	0.112028	9.80856e-06	0.000462328	chr3	107646883	+	chr3:107646470-107646941	Island	CGGGTCGGCTCGGGGCGGGCAGGGGTAGGATCCATACCGCCGAACTGCGGCCCCGCTGCT[CG]CAGCCGCTCTTCCGGGAGCGCCCGCTTAGGACTCACTCCCGCCCATTCCTTACCTCGATG	CGCAGCCGCTCTTCCGGGAGCGCCCGCTTAGGACTCACTCCCGCCCATTC	LOC285205	NR_015394	Body				TRUE	3:109128950-109129631	3:107645943-107647625	Unclassified							NA	TRUE
cg01707224	0.247108	0.524907	1.74952e-05	0.000723702	chr11	22359064	-	chr11:22362862-22363377	N_Shelf	AAGTTAAATATGTTGAAATCTTTCTTCCCTGCAATACTGGCATCAGCGTGCTGGACAAAA[CG]TAGCAAACTAGAAGTAACTTGTGAATTTTTAATAAAGTTGTCTTCCCTAGCAGAGCTAAA	TTGAAATCTTTCTTCCCTGCAATACTGGCATCAGCGTGCTGGACAAAACG	SLC17A6	NM_020346	TSS1500				NA				SLC17A6;CTD-2140G10.2;CTD-2140G10.2;CTD-2140G10.2	ENST00000263160.3;ENST00000528009.1;ENST00000530569.1;ENST00000531304.1	TSS1500;3'UTR;3'UTR;3'UTR	SLC17A6;CTD-2140G10.2;CTD-2140G10.2;CTD-2140G10.2	ENST00000263160.3;ENST00000528009.1;ENST00000530569.1;ENST00000531304.1	TSS1500;3'UTR;3'UTR;3'UTR	NA	NA
cg01707425	0.487127	0.172461	9.90474e-08	1.49336e-05	chr9	116638085	-	chr9:116638594-116638974	N_Shore	AATCTGGTTTTTTTTTGGCGGGGGGGTACAGCGGGGTACAGAGTTCCCATTAACCTCTTG[CG]TTCCGCCGAGAGCCGGCTCCCTGAACTTTTTTTCCAGCGTGAAAATGACATTTCCGAGGG	CGCAAGAGGTTAATGGGAACTCTGTACCCCGCTGTACCCCCCCGCCAAAA	ZNF618	NM_133374	TSS1500				NA	9:115677906-115678795			ZNF618	ENST00000374126.5	TSS1500	ZNF618;ZNF618;ZNF618	ENST00000374126.5;ENST00000452710.1;ENST00000481558.1	TSS1500;TSS1500;TSS1500	NA	NA
cg01709589	0.834127	0.532511	7.85059e-06	0.000390917	chr16	84941038	-		OpenSea	TCGTCTTCATGGCCCACCTGTTTTCTGCCGTGACCTTTGGTCCCATTGAGGACTAAGGAT[CG]GGACCCTTTCTTTACCCCCTACCCGTTGTGGCTCCCACCCTGCCTCGGACTGGTTTACGT	CCCACCTGTTTTCTGCCGTGACCTTTGGTCCCATTGAGGACTAAGGATCG	CRISPLD2	NM_031476	3'UTR				NA	16:83498315-83498673			CRISPLD2	ENST00000262424.5	3'UTR	CRISPLD2;CRISPLD2	ENST00000262424.5;ENST00000566165.1	3'UTR;5'UTR	NA	TRUE
cg01710158	0.730355	0.542658	2.7428e-06	0.000174208	chr11	65081843	-	chr11:65081937-65083333	N_Shore	GGACCAGGAACTAGTCTGAATATGAGCCCCACCTTCACTCTGGAAGCCTGACAGCAAAGA[CG]GGGGTCCAGGCCACGCGGCCTCTGCCTTCCCATACTGTCTTTTCTAGTGGGAGGTAAACT	AGTCTGAATATGAGCCCCACCTTCACTCTGGAAGCCTGACAGCAAAGACG	CDC42EP2	NM_006779	TSS1500				NA		11:65081771-65083639	Unclassified	CDC42EP2	ENST00000279249.2	TSS1500	CDC42EP2	ENST00000279249.2	TSS1500	NA	TRUE
cg01713265	0.811821	0.628415	1.49537e-05	0.000641702	chr9	110311041	+		OpenSea	ACAAGCGGGACCTCAGGTCTATAAACAGTTTCAGGAGGAAAGGGAAGCAGAATGAGGAAA[CG]AGGCTCCAATGCCAAGCATTGGGGAGCCCGGAAAGACCACATTTCCAAGAATTCCAGGCC	CGAGGCTCCAATGCCAAGCATTGGGGAGCCCGGAAAGACCACATTTCCAA					chr9:110310627-110310627		TRUE										NA	NA
cg01713337	0.347229	0.618478	5.87593e-06	0.000312068	chr9	1005399	-		OpenSea	TGACATGGATGATTTCAGGGACCTGACCCTGATGATGAGCTCTGCCAGGGGCTGTGGATG[CG]TTCCATCAAAGCTGAAAATATCATCAACTTATTGAATTGTCTTTTGTCCTACTTGATGTC	CGCATCCACAGCCCCTGGCAGAGCTCATCATCAGGGTCAGGTCCCTGAAA							NA										NA	NA
cg01718322	0.463633	0.138148	9.27903e-07	7.70835e-05	chr14	96342365	+	chr14:96342209-96343570	Island	TCCCGCCGGGGCGGGCTCACCGCGCGCCTCTGGGTGCCGAGCCTCCACAGGCCACATAGC[CG]CCACCTGCTGCTGCATCCCCACTGCGGGGACAGGGGCACTCAGTGCCTCCCTCCGTCCCC	CGCCACCTGCTGCTGCATCCCCACTGCGGGGACAGGGGCACTCAGTGCCT							NA	14:95411976-95413421			RP11-185P18.1;RP11-185P18.1;RP11-185P18.1	ENST00000504119.1;ENST00000503525.2;ENST00000554321.1	TSS1500;TSS1500;TSS1500	RP11-185P18.1;RP11-185P18.1;RP11-185P18.1	ENST00000504119.1;ENST00000503525.2;ENST00000554321.1	TSS1500;TSS1500;TSS1500	NA	TRUE
cg01718447	0.3564	0.0375251	7.12103e-06	0.000362019	chr7	30722327	-	chr7:30721372-30722445	Island	GAGGAGGGCGGTGGGCTGGAGAGCGTGGGCCTGGGGTGACGGAATGCTCTGTGCGGGGAT[CG]CAGGCCCCCGAGCTGCAGGGGGCAGCAAAGCGCGCCCACCTGCCCGCCTGCCCGAGGAGA	GGGCTGGAGAGCGTGGGCCTGGGGTGACGGAATGCTCTGTGCGGGGATCG	CRHR2	NM_001883	TSS200				NA	7:30687928-30688945	7:30721628-30722656	Unclassified	CRHR2;CRHR2	ENST00000506074.2;ENST00000471646.1	TSS1500;TSS200	CRHR2;CRHR2;CRHR2;CRHR2	ENST00000423776.1;ENST00000506074.2;ENST00000471646.1;ENST00000452278.1	3'UTR;TSS1500;TSS200;3'UTR	NA	TRUE
cg01720235	0.666505	0.828441	2.98891e-08	6.23653e-06	chr7	77650755	+	chr7:77649014-77649543	S_Shore	AAAAGATTCAGTCCCACACAGCAACCTCAGTGCATGTGATTCAAGCTCTTGCCTCTGTAA[CG]TGTCAGAGGCTGTCAGTGATACTTGTGCATACTCAGTCCATTAATGTCCAGGGTCTACTT	CGTGTCAGAGGCTGTCAGTGATACTTGTGCATACTCAGTCCATTAATGTC	MAGI2;MAGI2	NM_001301128;NM_012301	Body;Body				NA										NA	NA
cg01720705	0.250743	0.142963	2.97624e-06	0.000185182	chr1	231175557	-	chr1:231175062-231176317	Island	GCACGCGAGAAAAATGGGGGTCGTTGGGAGGACGGCGCCGGCGCCTGGGGCGGAGGAGCC[CG]AAAGGGCGGGTGGGCGCGGGGACTTCCGGACAGAGCGCGGTCCCCGCGAACTTTCCCGGG	CGGGCTCCTCCGCCCCAGGCGCCGGCGCCGTCCTCCCAACGACCCCCATT	FAM89A	NM_198552	Body				NA	1:229241686-229243632									NA	TRUE
cg01722932	0.561139	0.300634	1.19635e-05	0.000539474	chr11	92702653	-	chr11:92702789-92703434	N_Shore	CACCTGCTGGGCTCGGGGTGGCAGAGACAGCTGTGCGGTCCCAGCTGTTCCTGAGCGCAC[CG]CTGAGGGACGCACTCCCTTCTACAACGGCTGCACCCCAAGTCCTCCTCCCATTCCTATAT	CGGTGCGCTCAGGAACAGCTGGGACCGCACAGCTGTCTCTGCCACCCCGA	MTNR1B	NM_005959	TSS200				TRUE	11:92342213-92343072			MTNR1B	ENST00000257068.2	TSS1500	MTNR1B;MTNR1B;MTNR1B	ENST00000257068.2;ENST00000532482.1;ENST00000528076.1	TSS1500;TSS1500;TSS1500	NA	TRUE
cg01725626	0.549828	0.727938	4.30586e-06	0.000246368	chr6	111008787	-		OpenSea	GTATTGTTTCCATTAAACAAAAATGCCACTTCCTTCCCACTCTGCTAAGAAAACTGGGTA[CG]TGTTATGAGAAAACACAGAGGGGGATGAGCTTCCACAATGAAGTAAATGATTTCTTTTAT	TTAAACAAAAATGCCACTTCCTTCCCACTCTGCTAAGAAAACTGGGTACG	CDK19;CDK19;CDK19;CDK19	NM_001300964;NM_001300963;NM_001300960;NM_015076	Body;Body;Body;Body				NA							CDK19	ENST00000460913.1	3'UTR	NA	NA
cg01726277	0.558811	0.677334	1.49172e-05	0.000640568	chr1	101904143	+		OpenSea	ATCACTGTTTCGTCCCTTCCCTGCCCCAGTGCTGGTACTCTCTTTACAACATCTCCCCCA[CG]TGGTAGCCTTGATCCTGATAGAACTCACCTCATGAGCCTGAGGCAAAAATAGTCTCCAGC	TTTTGCCTCAGGCTCATGAGGTGAGTTCTATCAGGATCAAGGCTACCACG							NA		1:101903970-101904284	Unclassified_Cell_type_specific							NA	NA
cg01727646	0.543003	0.666139	4.78118e-06	0.00026651	chr1	26337472	-		OpenSea	GGATAGGGGCTTTCCCTAGTAGTCTGGTACCTGGCTCTGGGGTGATGAGGGCCGGAGAAT[CG]TGGCCCTGAGTGTGAGAGCCCAGTAGAGGAGGTGGCATGGGGTGTGAGCTCTTGATTGGT	TCCCTAGTAGTCTGGTACCTGGCTCTGGGGTGATGAGGGCCGGAGAATCG							TRUE										NA	TRUE
cg01730064	0.176195	0.611607	3.89651e-08	7.56385e-06	chr1	235362916	+		OpenSea	CACTCCTGTGGAGAATTAGAGAAGAGAAGGAAATGGACTGCCCGGGAAAAGATTCTAACA[CG]AAAATAACGGTAGGGGGCATTCCAGGCCCTATTCAGAGTAAGTTTAGTGAAGAGTGAGAG	ACTAAACTTACTCTGAATAGGGCCTGGAATGCCCCCTACCGTTATTTTCG	ARID4B;ARID4B	NM_031371;NM_016374	Body;Body				TRUE							ARID4B;ARID4B	ENST00000471257.1;ENST00000491632.1	3'UTR;3'UTR	NA	TRUE
cg01735148	0.603803	0.767461	3.5912e-07	3.78563e-05	chr1	94241221	+		OpenSea	CTAAGAGGAAATCACTGGAAAAAAAGTGCCTGCCATTCAGGGACCAATTTGAAATAAATA[CG]ATTTTCCACATAATGGAATAAAAAAGAGGAGGATGTGTATTTGCTGCTATGAAAATGTCT	CGATTTTCCACATAATGGAATAAAAAAGAGGAGGATGTGTATTTGCTGCT	BCAR3	NM_001261408	5'UTR				NA				RP11-488P3.1;BCAR3	ENST00000433544.1;ENST00000370244.1	TSS1500;5'UTR	RP11-488P3.1;BCAR3;BCAR3	ENST00000433544.1;ENST00000370244.1;ENST00000469315.1	TSS1500;5'UTR;3'UTR	NA	NA
cg01736264	0.738334	0.843003	3.15206e-06	0.000193398	chr1	26448411	+		OpenSea	AGAAATTGCCTTTGATCCCAGAAGCGCCTATTATTTGTGGTTTGTGATGGATTTTTGTGA[CG]GAGGAGATATGAATGAGTATCTGTTGTCCAGGAAACCCAATCGTAAAACTAACACCAGCT	CGGAGGAGATATGAATGAGTATCTGTTGTCCAGGAAACCCAATCGTAAAA	PDIK1L;PDIK1L;PDIK1L	NM_001243533;NM_001243532;NM_152835	Body;Body;Body				NA										NA	NA
cg01736356	0.246022	0.479153	2.86231e-07	3.203e-05	chr4	164465789	-		OpenSea	CTGCCACCTAGAGGGCGAGTGTGAGAATGGAGCCTCCCCTTCTGTGTTTATGAATCCCCA[CG]CAGAAATGCAGAAGTAACCAACCTTTCTGTGTTTTAATCTCCTCCTTATTTATATTTTTC	GGGCGAGTGTGAGAATGGAGCCTCCCCTTCTGTGTTTATGAATCCCCACG	MARCH1;MARCH1	NM_001166373;NM_017923	Body;Body				NA		4:164465126-164466246	Promoter_Associated				2001-03-01	ENST00000510786.1	3'UTR	NA	TRUE
cg01740479	0.576047	0.714475	1.61383e-05	0.000679962	chr1	98315085	+		OpenSea	ACAGCCCTGTAAAAGAGCCATTTCTACATTCATTTTTTTTTTTTTCGCCAGCTGAGAAAA[CG]GAAGCCCGGAGCTTAAATGACTTGCCTAGGTTTCCTGAGTAGAAACTGACAGAGCCTAGA	CGGAAGCCCGGAGCTTAAATGACTTGCCTAGGTTTCCTGAGTAGAAACTG	DPYD;DPYD	NM_000110;NM_001160301	Body;Body				NA										NA	NA
cg01741491	0.202475	0.416	1.5717e-05	0.0006667	chr7	5896222	+		OpenSea	TTATGGCCAAGATGGATTAACCCTCTTGCCTTAAATACCTAGAAAACCGTACAACACATA[CG]CAAAGGCAGTTTTTAGACACCGGTCAATAGGTGGCACTAAAGACCATGATCTCCGTTAGG	CGCAAAGGCAGTTTTTAGACACCGGTCAATAGGTGGCACTAAAGACCATG							NA		7:5896132-5896339	Unclassified_Cell_type_specific							NA	NA
cg01745370	0.147891	0.420932	3.36078e-06	0.000203069	chr2	109065127	+	chr2:109065509-109065954	N_Shore	ACGGCTGCCCAGTTCCCTGGCCGACTATCTTGCCTCCACCACATCACCATCAGTACCGGG[CG]GCTGCAGGGCAGAGCTGTCCAGGGACCTCCTCACAGCCTCCAGAGTCAAGAAATGCCTCC	TGACTCTGGAGGCTGTGAGGAGGTCCCTGGACAGCTCTGCCCTGCAGCCG	GCC2;GCC2	NR_028063;NM_181453	TSS1500;TSS1500				NA	2:108431393-108432466	2:109065050-109066597	Promoter_Associated	GCC2	ENST00000309863.5	TSS1500	GCC2;GCC2;GCC2;GCC2;GCC2;GCC2;GCC2;GCC2	ENST00000467566.1;ENST00000478207.1;ENST00000309863.5;ENST00000409821.1;ENST00000482325.1;ENST00000409896.1;ENST00000435553.1;ENST00000435553.1	TSS1500;TSS1500;TSS1500;TSS1500;TSS1500;TSS1500;5'UTR;1stExon	NA	TRUE
cg01745867	0.411702	0.168456	1.99967e-06	0.000137403	chr6	30710816	-	chr6:30710307-30712440	Island	GGATTCGCCGCGGGGCAACTACCTGGGAAAACCGCAGACTGGGCAATGAAAGACTACATC[CG]GCAACCGGATGCTGGGTTCTGTGACTCCAGGAAAAGGGGCTCCTGGGCCCAGGGAGGTGC	GGGCAACTACCTGGGAAAACCGCAGACTGGGCAATGAAAGACTACATCCG	FLOT1	NM_005803	TSS1500				NA	6:30818064-30818932	6:30710361-30712511	Promoter_Associated	FLOT1;FLOT1;FLOT1	ENST00000456573.2;ENST00000470643.1;ENST00000376389.3	TSS1500;TSS1500;TSS1500	FLOT1;FLOT1;FLOT1;FLOT1;FLOT1;FLOT1;FLOT1;FLOT1;FLOT1;FLOT1;FLOT1	ENST00000416018.1;ENST00000445853.1;ENST00000413165.1;ENST00000418160.1;ENST00000438162.1;ENST00000454845.1;ENST00000484693.1;ENST00000456573.2;ENST00000484168.1;ENST00000470643.1;ENST00000376389.3	TSS1500;TSS1500;TSS1500;TSS1500;TSS1500;TSS1500;TSS1500;TSS1500;TSS1500;TSS1500;TSS1500	NA	TRUE
cg01747912	0.158796	0.312989	2.71827e-06	0.000172942	chr11	2473897	-		OpenSea	GGGCCCTGGGCTTGGCATTCTATTCCGTGACGTCTCCAGCTGTTCTCTTGTGAAGAGTCA[CG]TCTGTGCTCTTGGCTAGGATGGCTCAAATATTATAAAACATACAGCTTTGCTAATTAAAA	TGGCATTCTATTCCGTGACGTCTCCAGCTGTTCTCTTGTGAAGAGTCACG	KCNQ1	NM_000218	Body				NA							KCNQ1	ENST00000345015.4	5'UTR	NA	NA
cg01749347	0.273938	0.0643334	1.09925e-07	1.60614e-05	chr7	100230985	-	chr7:100230649-100231320	Island	CCGGCCTCATCGACCCAGTGCAGGGTGTTGGGGTGAGCCCTGGGGAGCGGGGCTGGTGAG[CG]CCCCGAGCCGCGTCCCCCTCCCCGCGCGCCCCCCGCCCGCGCGCGCACTCACGGATCCGG	ACCCAGTGCAGGGTGTTGGGGTGAGCCCTGGGGAGCGGGGCTGGTGAGCG	TFR2	NM_003227	Body				TRUE	7:100068568-100069215	7:100230497-100231358	Promoter_Associated	TFR2	ENST00000544242.1	TSS1500	TFR2;TFR2;TFR2;TFR2;TFR2;TFR2;TFR2;TFR2;TFR2;TFR2	ENST00000473374.1;ENST00000473571.1;ENST00000473963.1;ENST00000475011.1;ENST00000473374.1;ENST00000473571.1;ENST00000462090.1;ENST00000490084.1;ENST00000465294.1;ENST00000476304.1	3'UTR;3'UTR;TSS1500;3'UTR;1stExon;1stExon;TSS1500;TSS1500;3'UTR;3'UTR	NA	TRUE
cg01752072	0.320844	0.455722	4.9522e-07	4.7949e-05	chr1	38356296	+		OpenSea	TTCAGTAGGGGGCACTGGAGTACAGACTTCAGATATTTATATAATAACACACCTCAGGGG[CG]AGTCAGGAAAGAGTAAATAAAACAGGAAAAAAAGTCACTTCAGAGTCAGGAAACACCTAA	TGACTCTGAAGTGACTTTTTTTCCTGTTTTATTTACTCTTTCCTGACTCG	INPP5B;INPP5B	NM_001297434;NM_005540	Body;Body				NA		1:38356059-38356394	Gene_Associated	INPP5B	ENST00000458109.2	TSS1500	INPP5B	ENST00000458109.2	TSS1500	NA	NA
cg01755187	0.534511	0.278626	1.84834e-08	4.37614e-06	chr1	4759920	+		OpenSea	TTTCCTTCTTCTGCAAGAGGAGAGTCAATGCCAACTCTTCCCCTAGGGTTACTGTGAGAA[CG]GCATGAGACAATTCCTGTGAGATGCTTAGCTCACTGCCTGGTATGTAGCTGTGGCTGAAT	CGGCATGAGACAATTCCTGTGAGATGCTTAGCTCACTGCCTGGTATGTAG	AJAP1;AJAP1	NM_018836;NM_001042478	Body;Body				NA										NA	NA
cg01755562	0.409329	0.0531512	2.94296e-06	0.000183595	chr3	139653545	+	chr3:139653430-139655115	Island	GTCCAAGGCTATCTACTCTGCCCGACAACCCCTAGCACCACTAGGCGCTGCTCTAGTGTG[CG]CCTGGCGCCCTCCCCAGACCAGTCGACGCAGAACGCCCAGAGACCCAGCCAAGGGCAAGA	CGCCTGGCGCCCTCCCCAGACCAGTCGACGCAGAACGCCCAGAGACCCAG	CLSTN2	NM_022131	TSS1500			CDMR	NA	3:141136121-141137805	3:139653383-139653703	Unclassified_Cell_type_specific	CLSTN2	ENST00000458420.2	TSS1500	CLSTN2;CLSTN2	ENST00000458420.2;ENST00000511524.1	TSS1500;TSS1500	NA	TRUE
cg01758336	0.596863	0.409532	1.25472e-05	0.00056017	chr16	89323312	-	chr16:89323280-89323661	Island	CAGGTCGCCTGGGCCCTGACCAAATGGTTCGTTGTCCGCCAAGCCAGACAGCAGGGCAGG[CG]CGCTCTGTGCAAAACCGAGTCGTGTGCGGGCCCAGGGTGGCGCTCGGGGCGCTTCCAGCG	GCCCTGACCAAATGGTTCGTTGTCCGCCAAGCCAGACAGCAGGGCAGGCG							TRUE	16:87850703-87851594	16:89323019-89324222	Unclassified							NA	TRUE
cg01762011	0.523525	0.313808	1.97e-05	0.00079441	chrX	139173393	+	chrX:139173387-139173767	Island	GATGAAGCCGACAAGTCCCAAAAATGTGTGAAAAGGGGGCTAAGAGGTAGGCAGGCGCCG[CG]TTGAGGCAGCGCTCCTGCCAGCCCCGCTCCGAGTTATCGGTGCTGCAGCCGCGGCGCAAG	CTGCAGCACCGATAACTCGGAGCGGGGCTGGCAGGAGCGCTGCCTCAACG						DMR	NA	X:139001007-139002329									NA	TRUE
cg01762091	0.585611	0.122688	1.3949e-07	1.90314e-05	chr17	7197775	+	chr17:7197431-7198417	Island	CCCTGCGGGCACCGGTACCACCACCGCTACCACCCCTGCCGCCGTCGCGGGCACCGTCGC[CG]CGGGGACCGCTGTAGCCCCCGCTGCCGCCTCCACCTCGCTCATCCCGCCGGGTCCAGTAC	CGCGGGGACCGCTGTAGCCCCCGCTGCCGCCTCCACCTCGCTCATCCCGC	YBX2	NM_015982	1stExon	high-CpG:7138402-7138683			NA	17:7138156-7139168	17:7196966-7198605	Unclassified	YBX2;YBX2	ENST00000570627.1;ENST00000007699.5	3'UTR;1stExon	YBX2;YBX2;YBX2;YBX2;YBX2;YBX2;YBX2	ENST00000570627.1;ENST00000571485.1;ENST00000571127.1;ENST00000571834.1;ENST00000571127.1;ENST00000007699.5;ENST00000571485.1	3'UTR;1stExon;3'UTR;TSS1500;1stExon;1stExon;3'UTR	NA	TRUE
cg01763051	0.377416	0.170837	9.02535e-10	5.15456e-07	chr6	150286157	+	chr6:150284682-150286515	Island	CGCCGAACATGCCCGGCTGAAGGCACTCAGTTCCCCTCCGCGGCTCCTTTCCTCCGGGTC[CG]CTTCCTGCGGCTGCTGCTTGCCCCATAGGCCAGGAGGCTTCTGGGTGGACCAGCGCGATC	CCACCCAGAAGCCTCCTGGCCTATGGGGCAAGCAGCAGCCGCAGGAAGCG	ULBP1	NM_025218	Body			CDMR	TRUE	6:150326602-150328155	6:150284270-150286273	Unclassified							NA	TRUE
cg01765564	0.211899	0.407645	7.98356e-07	6.87828e-05	chr2	68715135	+		OpenSea	GTTATGTGTCCACTAGAGGTCACATTATACTTTTATATTACTTAAAATGTCTTTTATCTT[CG]TAGTGTCAGTGAAGCTTACTTCAAAGAAAGACAGAGATAGGAAAAGTTCATGTATTGCTT	CGTAGTGTCAGTGAAGCTTACTTCAAAGAAAGACAGAGATAGGAAAAGTT	APLF	NM_173545	Body				NA		2:68714860-68715947	Unclassified							NA	NA
cg01766941	0.401996	0.554401	6.11337e-06	0.000321802	chr1	92953907	+	chr1:92945907-92952609	S_Shore	TTCACAGACTCTTGGGATTTCTGAGTTTGAAAAAGAAAACTGAGAACTGGAACAGGGACA[CG]CAGAAAGGAGCAGGTGGGAGGGAGATGGCACTGAATTTCCCTTTATGTCTTTTACATGTT	CGCAGAAAGGAGCAGGTGGGAGGGAGATGGCACTGAATTTCCCTTTATGT	GFI1	NM_005263	TSS1500				NA				GFI1	ENST00000294702.5	TSS1500	GFI1	ENST00000294702.5	TSS1500	NA	TRUE
cg01770755	0.454872	0.110167	5.2655e-11	6.54922e-08	chr15	41914122	+	chr15:41913333-41914360	Island	TGCGGCCTGTAAATTCTGGCCGCGGCTTTTCGTGGCGTCCTGCTCCGCGGTGAGCACAGA[CG]ACAAGTTCTCAGCAAAATGGCTGCTGGAAAGAGTCGCCAAGCAGGGGGAGTGCTGGGGCC	CCCCCTGCTTGGCGACTCTTTCCAGCAGCCATTTTGCTGAGAACTTGTCG							NA	15:39700559-39701770	15:41913064-41914985	Promoter_Associated_Cell_type_specific	MGA	ENST00000568630.1	5'UTR	MGA;MGA	ENST00000568630.1;ENST00000563576.1	5'UTR;5'UTR	NA	TRUE
cg01773376	0.415259	0.113091	3.18019e-07	3.46416e-05	chr19	15619236	-	chr19:15619223-15619613	Island	CACCCCTCCACACGCCTATTTCTTGTTCTCTCCTTTTCTAGGGGGCAGCGCTGGAGTCCC[CG]CCCAGAACCCTGCGGGAGCCCGGGGCGGGATGTCCGGGGGCGGACCCCTCGGCACGGCCG	CGGGGACTCCAGCGCTGCCCCCTAGAAAAGGAGAGAACAAGAAATAGGCG	CYP4F22	NM_173483	TSS200			DMR	NA		19:15618869-15619738	Unclassified_Cell_type_specific							NA	NA
cg01775492	0.66066	0.768959	5.48044e-06	0.00029587	chr1	35439960	-	chr1:35442237-35442936	N_Shelf	TCTTGAAGGCAATTTGCTGTCATTAAACATTGGCACACAGATATTCTTTGACAGCAGTTT[CG]TTGCCAGGAATTTATTCTACAGATTTACAAGTATGCAAACATTTGTTAACAAGAGCATTC	TTTGCTGTCATTAAACATTGGCACACAGATATTCTTTGACAGCAGTTTCG							NA				RP11-244H3.1	ENST00000417456.1	3'UTR	RP11-244H3.1	ENST00000417456.1	3'UTR	NA	TRUE
cg01781567	0.212834	0.39394	1.04777e-05	0.000486783	chr10	92806832	-		OpenSea	TGATTTTCCATCTGGCCTAACCAGAGTCTGAAGTTGCTGAATCAAACAGAGCCAATAGGT[CG]GACTTGAGCTGACTGGAGCATGCACAGAGCTGGGAAGCACAAGTATGTTCCTTTTGTAAA	TGGCCTAACCAGAGTCTGAAGTTGCTGAATCAAACAGAGCCAATAGGTCG	LINC00502	NR_047467	Body				NA				LINC00502	ENST00000423621.1	TSS200	LINC00502	ENST00000423621.1	TSS200	NA	NA
cg01784852	0.247575	0.0479511	7.04752e-06	0.000359156	chr1	94703167	+	chr1:94702690-94703344	Island	AGCCGCAGCCACAGCCACAGGCACCACCACCACTGCAGCCGCCACCGCCCCTGCAGCTAC[CG]CCACGGCCGCACCGCCCGCCCGCCAGCCCCGCCCCCTGGAGCCCAGCCCATTGGCCCGCG	CGCCACGGCCGCACCGCCCGCCCGCCAGCCCCGCCCCCTGGAGCCCAGCC	ARHGAP29;ARHGAP29	NM_004815;NM_004815	1stExon;5'UTR	high-CpG:94475504-94475843			NA	1:94475242-94475932	1:94702981-94703370	Unclassified_Cell_type_specific	ARHGAP29;ARHGAP29;ARHGAP29	ENST00000370217.3;ENST00000260526.6;ENST00000370217.3	1stExon;TSS200;5'UTR	ARHGAP29;ARHGAP29;ARHGAP29;ARHGAP29	ENST00000370217.3;ENST00000260526.6;ENST00000370217.3;ENST00000552844.1	1stExon;TSS200;5'UTR;5'UTR	NA	TRUE
cg01785514	0.26257	0.526059	1.69496e-05	0.000705341	chr1	212988523	+		OpenSea	CTGTTTCCTAAGCTCCGACACTTGCTCCAGAAATAGCTTCAAAACCATCCATTACAAAAT[CG]AATCAACTGCAGGGGGCAGCATTTGAAAAATAGAAATGTTCTGATGAAGAATCTGAACTG	CGAATCAACTGCAGGGGGCAGCATTTGAAAAATAGAAATGTTCTGATGAA	TATDN3;TATDN3;TATDN3;TATDN3;TATDN3	NM_001146170;NM_001146171;NM_001146169;NM_001042552;NM_001042553	3'UTR;3'UTR;3'UTR;3'UTR;3'UTR				TRUE				TATDN3;TATDN3;TATDN3;TATDN3;TATDN3;TATDN3	ENST00000526997.1;ENST00000531963.1;ENST00000526641.1;ENST00000532324.1;ENST00000366973.4;ENST00000366974.4	3'UTR;3'UTR;3'UTR;3'UTR;3'UTR;3'UTR	TATDN3;TATDN3;TATDN3;TATDN3;TATDN3;TATDN3;TATDN3;TATDN3	ENST00000525574.1;ENST00000526997.1;ENST00000527693.1;ENST00000531963.1;ENST00000526641.1;ENST00000532324.1;ENST00000366973.4;ENST00000366974.4	3'UTR;3'UTR;3'UTR;3'UTR;3'UTR;3'UTR;3'UTR;3'UTR	NA	TRUE
cg01788767	0.630318	0.835491	7.72817e-08	1.23835e-05	chr12	67614003	+		OpenSea	TGGGAAAATAGGCAAAAACAGTCCTGTGCAAACTATAACATATGTTGACCTTACTCGTTA[CG]GCAATTAGATCCAGCTTGCCTCTGATGATTCAGTGCTGCCACCTGGCTTCTGCCACTTCA	CGGCAATTAGATCCAGCTTGCCTCTGATGATTCAGTGCTGCCACCTGGCT							NA										NA	NA
cg01791865	0.603917	0.830124	1.6689e-06	0.000119729	chr5	63954708	+		OpenSea	CTTATTTTGGTTGGTACTGAGGATTTTCTTGTAAAGTGCATTAGAAAAGGTCTTTATATA[CG]ATAAGAACAATAATAAAAGATCTGGTGATGCCGCGGTGAAAGGATTCTCCTCCAGGAGCT	CGATAAGAACAATAATAAAAGATCTGGTGATGCCGCGGTGAAAGGATTCT							TRUE										NA	TRUE
cg01792640	0.4526	0.82812	2.38597e-10	2.02164e-07	chr3	195600916	-	chr3:195600845-195602361	Island	CGAGTCCCATCTGAAAAATAGCAGGGCCACTCGAAGGAGCAGAGCCCCGGCTCCCCAGCA[CG]CACACAGCCTCCCACGGCGGCCCGTAGAGGAGGAACCCCGGCACCGGCTGGGCTGCGGCT	GAAAAATAGCAGGGCCACTCGAAGGAGCAGAGCCCCGGCTCCCCAGCACG	TNK2;TNK2	NM_001010938;NM_005781	Body;Body				NA	3:197085243-197085553						TNK2;TNK2;TNK2;TNK2;TNK2;TNK2	ENST00000478623.1;ENST00000489628.1;ENST00000468680.1;ENST00000464041.1;ENST00000481865.1;ENST00000486523.1	3'UTR;3'UTR;TSS1500;3'UTR;3'UTR;3'UTR	NA	TRUE
cg01800426	0.125415	0.023122	4.55023e-06	0.000256843	chr8	17659068	+	chr8:17658166-17659321	Island	CGCTCCCGCTCTCGGGTCCCAATCCCGACGCTCCGCGCGCTCCCGGACTAAGTGCGGACG[CG]CCCCACGCCCCCCGGCGCCAGCCCGGGACAGCGCTGCACCTGTTGCCACGTGCGACGCGG	CGCCCCACGCCCCCCGGCGCCAGCCCGGGACAGCGCTGCACCTGTTGCCA	MTUS1;MTUS1	NM_001001924;NM_001001925	TSS1500;TSS1500				NA	8:17702447-17703637	8:17658102-17659618	Unclassified_Cell_type_specific	MTUS1;MTUS1;RP11-156K13.1;RP11-156K13.1	ENST00000262102.6;ENST00000381869.3;ENST00000522768.1;ENST00000522768.1	TSS1500;TSS1500;1stExon;5'UTR	MTUS1;MTUS1;RP11-156K13.1;RP11-156K13.1	ENST00000262102.6;ENST00000381869.3;ENST00000522768.1;ENST00000522768.1	TSS1500;TSS1500;1stExon;5'UTR	NA	TRUE
cg01804434	0.466404	0.905538	7.26468e-14	4.45708e-10	chr2	240456931	-		OpenSea	TCTGGTCTCAGCTGGAGCTGTGTGCAGGCTTGTGCACCATGAGGCCCCTTTTCTGTCCCA[CG]TTAGGATCCACCCTGGGCTGCATCAGCACAGTGGGTCAGAAAGGAGCCCCGGGGATGGGG	CGTGGGACAGAAAAGGGGCCTCATGGTGCACAAGCCTGCACACAGCTCCA							NA										NA	NA
cg01805282	0.68627	0.34354	8.9877e-06	0.000432845	chr6	133563764	+	chr6:133563701-133563905	Island	GATTTTTAGCGTGGTGAAGCGAGGTTTGGAAGTAGACGTGTGTGTGCTTGTTTTATTCTG[CG]CCGCACAGCAACCCGAACTTTCGTTTGGTAGCACTTGAAAGAGTTTTCTCCCTTTGTTTG	CGCCGCACAGCAACCCGAACTTTCGTTTGGTAGCACTTGAAAGAGTTTTC	EYA4;EYA4;EYA4	NM_004100;NM_172105;NM_172103	5'UTR;5'UTR;5'UTR			CDMR	TRUE	6:133603342-133605921			EYA4;EYA4;EYA4;EYA4;EYA4;EYA4;EYA4	ENST00000441015.1;ENST00000430974.2;ENST00000355167.3;ENST00000355286.6;ENST00000531901.1;ENST00000525849.1;ENST00000452339.2	5'UTR;5'UTR;5'UTR;5'UTR;5'UTR;5'UTR;5'UTR	EYA4;EYA4;EYA4;EYA4;EYA4;EYA4;EYA4	ENST00000441015.1;ENST00000430974.2;ENST00000355167.3;ENST00000355286.6;ENST00000531901.1;ENST00000525849.1;ENST00000452339.2	5'UTR;5'UTR;5'UTR;5'UTR;5'UTR;5'UTR;5'UTR	TRUE	TRUE
cg01807958	0.632595	0.760159	4.73137e-06	0.000264494	chr1	77730341	-		OpenSea	ACAGTCTGTATTTTAAACCAACCCATCTTAAATGAATTCCTCTCAAGTGTGATGGAATAT[CG]CCTAGGTATTTTTGTATGATATGGTAACAGAGACAAATAGATAGAAACTTCATTCTATTT	TTAAACCAACCCATCTTAAATGAATTCCTCTCAAGTGTGATGGAATATCG							TRUE										NA	TRUE
cg01811325	0.49637	0.15094	1.07744e-08	2.98385e-06	chr10	131757672	+	chr10:131756690-131758787	Island	ACCGACCCCGGAACCCGGGGCTCCCGGGCCCCTTCGGCATTCCGCGCCGCCGCCAGGCCG[CG]TCCTCAGGCCATTGTCTACAACGAGTTCCAATCTGCATGTTGGGAGAGGCCGATCAGAAC	CTCTCCCAACATGCAGATTGGAACTCGTTGTAGACAATGGCCTGAGGACG	EBF3	NM_001005463	Body			DMR	NA	10:131646873-131648103									NA	TRUE
cg01813033	0.459641	0.11695	8.45746e-11	9.40145e-08	chr6	132272609	-	chr6:132271356-132271658	S_Shore	CCGGGCGGCCGCGGCTCGCCAATGAGCTGAATGGAGTCCTACACAAACAGGGACATTCCT[CG]CATTCCTCCCCACCTTCCTGCCTCATCAACTCACACCGGATTGATCCTGACCCCTTGACA	GGCTCGCCAATGAGCTGAATGGAGTCCTACACAAACAGGGACATTCCTCG	CTGF	NM_001901	TSS200				NA				CTGF;RP11-69I8.3	ENST00000367976.3;ENST00000435287.1	TSS200;5'UTR	CTGF;RP11-69I8.3	ENST00000367976.3;ENST00000435287.1	TSS200;5'UTR	NA	TRUE
cg01815263	0.342246	0.617415	3.1447e-07	3.43643e-05	chr3	5237478	+		OpenSea	AACCCTTCTCTTTTATTTGCCACTTCCTGTTTTGTGGACACTCCATGCCTGAGCTGCCAA[CG]TGGGTGCTGGCATTACTGCCTCATCCTGTGGTTTTGCTCATTGACTCTGGAGAACTAGAG	CGTGGGTGCTGGCATTACTGCCTCATCCTGTGGTTTTGCTCATTGACTCT	EDEM1	NM_014674	Body		chr3:5237403-5237403		TRUE		3:5237302-5237493	Promoter_Associated_Cell_type_specific	EDEM1	ENST00000445686.1	5'UTR	EDEM1;EDEM1;EDEM1	ENST00000445686.1;ENST00000465369.1;ENST00000492751.1	5'UTR;5'UTR;5'UTR	NA	TRUE
cg01815671	0.57323	0.0656143	1.03491e-05	0.000482038	chr3	126113663	+	chr3:126113547-126113967	Island	ACATCGTGCCCAGAGCTCGGACCCAGCAGCCCGGCCCCGCGCCCTCCCTGTCCCGCGGCC[CG]CAGGCCCAGCCCTCAAGCGCCCAGCCTCCGCGGCCTTTGTGGCGTCACAGCCAGCCTGAA	GTGACGCCACAAAGGCCGCGGAGGCTGGGCGCTTGAGGGCTGGGCCTGCG	CCDC37	NM_182628	TSS200			DMR	TRUE	3:127595930-127596657			RP11-71E19.5;CCDC37;RP11-71E19.5;CCDC37;RP11-71E19.5;CCDC37;RP11-71E19.5	ENST00000506660.1;ENST00000510833.1;ENST00000506660.1;ENST00000505024.1;ENST00000511287.1;ENST00000352312.1;ENST00000505467.1	3'UTR;TSS1500;1stExon;TSS1500;TSS1500;TSS200;TSS1500	RP11-71E19.5;CCDC37;RP11-71E19.5;CCDC37;RP11-71E19.5;CCDC37;RP11-71E19.5	ENST00000506660.1;ENST00000510833.1;ENST00000506660.1;ENST00000505024.1;ENST00000511287.1;ENST00000508140.1;ENST00000505467.1	3'UTR;TSS1500;1stExon;TSS1500;TSS1500;TSS200;TSS1500	NA	TRUE
cg01824511	0.375959	0.135952	3.29099e-09	1.32774e-06	chr14	38064456	+	chr14:38063663-38065665	Island	GGCTGCCGCGGAGCGCGGCGCCGGGGAGCGCCTCCGCGGGAAGTGAGCGGGCTGCCTCTG[CG]AGGCAAGTGCAGTTGAGCTGATGTGGATCTTACGTCGCTTGAGTGCCCACCTCCTCGTCC	GGGCACTCAAGCGACGTAAGATCCACATCAGCTCAACTGCACTTGCCTCG	FOXA1;FOXA1	NM_004496;NM_004496	5'UTR;1stExon	high-CpG:37133980-37134412			NA	14:37133439-37134763			FOXA1;FOXA1;FOXA1	ENST00000540786.1;ENST00000545425.2;ENST00000250448.2	5'UTR;TSS1500;TSS1500	FOXA1;TTC6;FOXA1;FOXA1;FOXA1;FOXA1;FOXA1	ENST00000540786.1;ENST00000556845.1;ENST00000545425.2;ENST00000557418.1;ENST00000553751.1;ENST00000554607.1;ENST00000250448.2	5'UTR;TSS1500;TSS1500;3'UTR;TSS200;TSS1500;TSS1500	NA	TRUE
cg01824737	0.497463	0.65956	1.0397e-05	0.000483915	chr1	28160389	+	chr1:28157221-28157788	S_Shelf	TTGTCACTTTTGAGATGTTGTAGAGATAACCAGGTATTTTGCAAAGTATTAAGGCATGCA[CG]AGTTTTAATGATTTCTCCTGTTATGAATACATCATGGACTCAGCCAGTCACAGAGAGCCC	ACTGGCTGAGTCCATGATGTATTCATAACAGGAGAAATCATTAAAACTCG	SCARNA1;PPP1R8;PPP1R8;PPP1R8	NR_002997;NM_138558;NM_002713;NM_014110	TSS1500;5'UTR;5'UTR;Body				NA				SCARNA1;PPP1R8;PPP1R8;PPP1R8	ENST00000517138.1;ENST00000236412.7;ENST00000373931.4;ENST00000399118.2	TSS1500;5'UTR;5'UTR;5'UTR	SCARNA1;PPP1R8;PPP1R8;PPP1R8;PPP1R8	ENST00000517138.1;ENST00000236412.7;ENST00000373931.4;ENST00000399118.2;ENST00000431586.1	TSS1500;5'UTR;5'UTR;5'UTR;5'UTR	NA	NA
cg01827202	0.658909	0.792238	1.17417e-06	9.22548e-05	chr1	65876392	+		OpenSea	CTCATTTGTTCAAACTGTGAATGTTCATAGTTCAAATAAATGGCTAAATGGGTCAATTCA[CG]TAACAAGCCTTTTTGAGCTCTGTTCTGCACCAGGTTACTTATTTGGTTCCGAGATACAGT	AACCAAATAAGTAACCTGGTGCAGAACAGAGCTCAAAAAGGCTTGTTACG	DNAJC6	NM_014787	Body				TRUE				DNAJC6	ENST00000494710.1	5'UTR	DNAJC6	ENST00000494710.1	5'UTR	NA	TRUE
cg01828530	0.595654	0.735027	1.68979e-06	0.00012078	chr1	36105569	+	chr1:36106969-36107261	N_Shore	ATTAACCTTTTGAGATAGGTGCTATTACATTACCACCTTATAGATGTTAGCTCTAGGGCA[CG]GAGTTAGAGAAATTTGCTTAAGGTCACAAGTGGCAGAACCTGGGTTCAACCTATGCAGTG	CGGAGTTAGAGAAATTTGCTTAAGGTCACAAGTGGCAGAACCTGGGTTCA	PSMB2	NM_002794	Body				NA										NA	TRUE
cg01833222	0.65058	0.875521	1.15084e-05	0.000523626	chr3	49162453	+	chr3:49157768-49158463	S_Shelf	GCCCAGCCAACTCACCCTGATCCCACGCCTGCCCCCATCCACTCACCCGTATAGCCTGCC[CG]GCAGTGGCACACAATCTGCTGGGAATATTCATCCTGGTGGCAAGAAGTAGCAAAGTGCCG	ACTTCTTGCCACCAGGATGAATATTCCCAGCAGATTGTGTGCCACTGCCG	LAMB2	NM_002292	Body				NA				LAMB2;LAMB2;LAMB2	ENST00000395387.2;ENST00000464891.1;ENST00000418109.1	TSS1500;3'UTR;ExonBnd	LAMB2;LAMB2;LAMB2;LAMB2;LAMB2;LAMB2;LAMB2;LAMB2;LAMB2;LAMB2;LAMB2;LAMB2	ENST00000469665.1;ENST00000395387.2;ENST00000477225.1;ENST00000542580.1;ENST00000480640.1;ENST00000462930.1;ENST00000464891.1;ENST00000538659.1;ENST00000483057.1;ENST00000418109.1;ENST00000486298.1;ENST00000542580.1	TSS1500;TSS1500;TSS1500;3'UTR;TSS1500;3'UTR;3'UTR;TSS1500;3'UTR;ExonBnd;3'UTR;1stExon	NA	TRUE
cg01834160	0.686594	0.906065	1.06776e-05	0.000493912	chr16	70713567	+	chr16:70713461-70714379	Island	GGCTGGGGGGCCGCGCCAGGCACTACCTTTGCGCGCCTTCTTCTGCAGCTTCAGCGTGTC[CG]ACGACTTCTTTTTGATCTCATGCCGGGCTCGTTTGTACTCTGCAGAAGGGGAGAGCGGAG	CTTCTGCAGAGTACAAACGAGCCCGGCATGAGATCAAAAAGAAGTCGTCG	MTSS1L	NM_138383	Body				TRUE	16:69270991-69271864						MTSS1L	ENST00000562883.2	TSS1500	NA	TRUE
cg01834856	0.210461	0.44731	7.297e-07	6.42914e-05	chr7	99639091	+		OpenSea	GGAAAAGTGGTTTTTTAAAAGCTAGGGAACTCCTCCACTAAAAGTAACCATTGGAAACCT[CG]AATGAGGGCTAAAGTTTTAATCATAAGAGAAAAGGCAGCATAATGAAATGTGTACACATA	TTTCATTATGCTGCCTTTTCTCTTATGATTAAAACTTTAGCCCTCATTCG							TRUE		7:99639049-99639207	Unclassified_Cell_type_specific	ZKSCAN1	ENST00000324306.6	3'UTR	ZKSCAN1	ENST00000324306.6	3'UTR	NA	TRUE
cg01838523	0.654769	0.422892	3.17925e-07	3.4641e-05	chr20	43343290	-		OpenSea	AGGCGAACTCAGAGGCGGCCGAATGAAACCAAATGGATTTGGCTTGACCCCATCATCTAG[CG]GTGCCCAGCAAGCGCTGGCACATAGTAGGTCCAGCCTGCCCGGACTCGCCCACCACGGGC	AGGCGGCCGAATGAAACCAAATGGATTTGGCTTGACCCCATCATCTAGCG	WISP2	NM_003881	TSS1500				TRUE				WISP2;WISP2;WISP2;RP11-445H22.4;RP11-445H22.4;RP11-445H22.4	ENST00000372865.4;ENST00000190983.4;ENST00000372868.2;ENST00000427598.1;ENST00000445420.1;ENST00000427303.1	TSS1500;TSS1500;TSS200;3'UTR;3'UTR;3'UTR	WISP2;WISP2;WISP2;WISP2;RP11-445H22.4;RP11-445H22.4;RP11-445H22.4	ENST00000372865.4;ENST00000497421.1;ENST00000190983.4;ENST00000372868.2;ENST00000427598.1;ENST00000445420.1;ENST00000427303.1	TSS1500;TSS1500;TSS1500;TSS200;3'UTR;3'UTR;3'UTR	NA	NA
cg01841825	0.286186	0.740189	5.73597e-12	1.20279e-08	chr18	50430247	-		OpenSea	TCATGCTCTGTTTAAGTACATGCCTTAAATCCATACCTGAGCCAATCTGTAGTAGATTAA[CG]TACTTCTTTGGAATAGACACAAGACTGTATAATGCAGACAGTCTGGAAACTGGATTTTGA	TAAGTACATGCCTTAAATCCATACCTGAGCCAATCTGTAGTAGATTAACG	DCC	NM_005215	Body				NA				DCC	ENST00000412726.1	5'UTR	DCC	ENST00000412726.1	5'UTR	NA	NA
cg01849851	0.440037	0.618202	5.32935e-07	5.06553e-05	chr1	10608782	-		OpenSea	TTTATTTTTAACTATAGATAGGCTTGCTAGGTTGGTCATTCCACAGCTTGGTCTTCTTTC[CG]TTTTTGAAGTAAAGGTAACTCACTAATGGTCCTCAGTAAACAGAGTGATGGGGCAAGCTG	CGGAAAGAAGACCAAGCTGTGGAATGACCAACCTAGCAAGCCTATCTATA	PEX14	NM_004565	Body				NA				PEX14	ENST00000538836.1	5'UTR	PEX14;PEX14	ENST00000538836.1;ENST00000491661.1	5'UTR;5'UTR	NA	NA
cg01852585	0.23783	0.0921541	3.42751e-06	0.000206358	chr4	106817015	-	chr4:106816415-106817769	Island	CCGCGGGGTTTCGTGGTCAGAGAGGCGTCTCCTCCATCCAGAAGTTGGGCCACCGCACAG[CG]TGGCGCGAGGAGAGCGGTCCAGCGGCTCCGAGTGCCCGCCCGAGGCGGAGAGGGCGCGCC	CGCTGTGCGGTGGCCCAACTTCTGGATGGAGGAGACGCCTCTCTGACCAC	NPNT	NM_001033047	Body				TRUE	4:107035682-107037239						INTS12;INTS12;NPNT	ENST00000510876.1;ENST00000510876.1;ENST00000504304.1	1stExon;5'UTR;5'UTR	NA	TRUE
cg01854538	0.69235	0.79935	1.30995e-06	9.99804e-05	chr1	76477059	-		OpenSea	TCCCTGAAAGGATCTCCATGACCTCTATGGTTCCTTAGACTGCACTTTGAGAACTATTGA[CG]TACAGGGAAAAATGCTCTTGGTGGTAAGATTACAACTCTATATAAAAGAGATAAAAGCAT	CGTCAATAGTTCTCAAAGTGCAGTCTAAGGAACCATAGAGGTCATGGAGA	LOC101927342	NR_125939	Body				NA				RP11-550H2.1;RP11-550H2.1	ENST00000436121.1;ENST00000436121.1	1stExon;5'UTR	RP11-550H2.1;RP11-550H2.1	ENST00000436121.1;ENST00000436121.1	1stExon;5'UTR	NA	NA
cg01854969	0.229884	0.0371221	2.98837e-06	0.000185609	chr19	35644903	-	chr19:35645597-35646047	N_Shore	GCCGACCCTGCCTGAGCGCGGGAGCCTGAGGACCGGGTGGAGGCGGTGGGGACCCAGCCG[CG]CGCCGGGAGCGCTCCCCGGAATGAGCCGCCCCACCCACCCCAAGGCTGGAGCCGCTGCAC	TGAGCGCGGGAGCCTGAGGACCGGGTGGAGGCGGTGGGGACCCAGCCGCG	FXYD5;FXYD5;FXYD5;FXYD5;FXYD7	NM_001164605;NR_028406;NM_014164;NM_144779;NM_022006	TSS1500;TSS1500;TSS1500;TSS1500;3'UTR				NA	19:40336668-40336981	19:35643397-35646155	Promoter_Associated	FXYD5;FXYD5;FXYD5;FXYD5;FXYD5;FXYD5;FXYD5;FXYD7	ENST00000543307.1;ENST00000392218.1;ENST00000392219.2;ENST00000496493.1;ENST00000541435.1;ENST00000342879.3;ENST00000423817.2;ENST00000270310.1	TSS1500;TSS1500;TSS1500;TSS1500;TSS1500;TSS1500;TSS1500;3'UTR	FXYD5;FXYD5;FXYD5;FXYD5;FXYD5;FXYD5;FXYD5;FXYD7	ENST00000543307.1;ENST00000392218.1;ENST00000392219.2;ENST00000496493.1;ENST00000541435.1;ENST00000342879.3;ENST00000423817.2;ENST00000270310.1	TSS1500;TSS1500;TSS1500;TSS1500;TSS1500;TSS1500;TSS1500;3'UTR	NA	TRUE
cg01856162	0.258463	0.0613056	5.84375e-07	5.42121e-05	chr2	233350940	-	chr2:233350278-233352974	Island	GTAGGCGCTCCTCGTTTTGCTCGCCGATGGCCGCGATGGTGCCATAGGTGAGCTTGTCGT[CG]GGGATGGCGTGGCGCCGCAGCCAACCGCCGCAGGCGAACGAGTAGAAGTCCTGGCATGGG	CGTTTTGCTCGCCGATGGCCGCGATGGTGCCATAGGTGAGCTTGTCGTCG	ECEL1	NM_004826	Body			DMR	NA	2:233058523-233061084			ECEL1	ENST00000409941.1	1stExon	ECEL1;ECEL1	ENST00000482346.1;ENST00000409941.1	3'UTR;1stExon	NA	TRUE
cg01857829	0.311484	0.0727281	8.52951e-08	1.32677e-05	chr16	68771498	-	chr16:68771034-68772344	Island	TCCTCTCCCGTCGTCACCGCTTCCCTTCTTCCAAGAAAGTTCGGGTCCTGAGGAGCGGAG[CG]GCCTGGAAGCCTCGCGCGCTCCGGACCCCCCAGTGATGGGAGTGGGGGGTGGGTGGTGAG	GTCACCGCTTCCCTTCTTCCAAGAAAGTTCGGGTCCTGAGGAGCGGAGCG	CDH1	NM_004360	Body	high-CpG:67328851-67329031			NA	16:67328536-67329832	16:68770957-68772797	Unclassified							NA	TRUE
cg01862160	0.460142	0.127225	2.85196e-07	3.1931e-05	chr9	135456402	+	chr9:135455164-135458586	Island	GGGCTGACCCTAGAAAGGCGCTGGACTGGAGCCCGTGACGGGGTGGGAAGGGCGAGGGGG[CG]CATGATTCACAATGAAAAGGCCACGTTTCCAGAGTTGCCTTGAAAATGCATCCCTGGACG	CATTTTCAAGGCAACTCTGGAAACGTGGCCTTTTCATTGTGAATCATGCG							NA	9:134444986-134446847			BARHL1	ENST00000263610.2	TSS1500	BARHL1	ENST00000263610.2	TSS1500	NA	TRUE
cg01865114	0.722838	0.854723	8.91344e-06	0.00042992	chr16	84066115	-		OpenSea	GTGCTGGAATTACAGGTGTGACGCCCAGCCCAAATGTGTAGAATTCTTAATGGCACCCGG[CG]CCCTTCGGGATGGCAGCTGTAATAGTGTTTCCTTCCCACCAGCAAAAGCTAATCAGCCAC	CGCCGGGTGCCATTAAGAATTCTACACATTTGGGCTGGGCGTCACACCTG	SLC38A8	NM_001080442	Body				TRUE										NA	TRUE
cg01865313	0.650279	0.841112	1.52129e-05	0.000650552	chr4	80132812	+		OpenSea	AGAGTTCTGTTCTCCTCCCTATTCCCCACCCCCCACAAGCTGGAGGGCCAGAAGGTGGGG[CG]GTACCTCAGGATAATGGCAGCAGAAGGCAAAGGGAGCAGACAGCTGGCAAGCTCTGTCCC	GCCAGCTGTCTGCTCCCTTTGCCTTCTGCTGCCATTATCCTGAGGTACCG	LINC01088	NR_038342	Body	low-CpG:80351824-80351897			NA				RP11-438E5.1;RP11-438E5.1;RP11-438E5.1;RP11-438E5.1;RP11-438E5.1;RP11-438E5.1;RP11-438E5.1;RP11-438E5.1;RP11-438E5.1	ENST00000437737.3;ENST00000511895.1;ENST00000507761.1;ENST00000510667.1;ENST00000509088.1;ENST00000513153.1;ENST00000515597.1;ENST00000507476.1;ENST00000512130.1	TSS200;TSS200;5'UTR;5'UTR;5'UTR;5'UTR;5'UTR;5'UTR;5'UTR	RP11-438E5.1;RP11-438E5.1;RP11-438E5.1;RP11-438E5.1;RP11-438E5.1;RP11-438E5.1;RP11-438E5.1;RP11-438E5.1;RP11-438E5.1	ENST00000437737.3;ENST00000511895.1;ENST00000507761.1;ENST00000510667.1;ENST00000509088.1;ENST00000513153.1;ENST00000515597.1;ENST00000507476.1;ENST00000512130.1	TSS200;TSS200;5'UTR;5'UTR;5'UTR;5'UTR;5'UTR;5'UTR;5'UTR	NA	NA
cg01867395	0.545631	0.115268	6.12201e-09	2.03319e-06	chr11	31839628	-	chr11:31839363-31839813	Island	CCGGCCCGCGTGACGTCATGGCGGCTAGAGTTGGGCACAGCTCTGCGCCGACTAGTTTTC[CG]GCCGGGCGGGAGCCTGCTTCTCCCCACCCAGGGTCCGGCCGGCTCCAACCCCTGCTTTGG	ACGTCATGGCGGCTAGAGTTGGGCACAGCTCTGCGCCGACTAGTTTTCCG	PAX6	NM_001127612	TSS200				NA	11:31794464-31796643	11:31839024-31839969	Unclassified_Cell_type_specific	PAX6;PAX6;RCN1	ENST00000464174.1;ENST00000419022.1;ENST00000506388.2	TSS200;TSS200;5'UTR	PAX6;PAX6;PAX6;PAX6;RCN1;RCN1	ENST00000464174.1;ENST00000423822.1;ENST00000532175.1;ENST00000419022.1;ENST00000530348.1;ENST00000506388.2	TSS200;TSS200;TSS200;TSS200;5'UTR;5'UTR	NA	TRUE
cg01867647	0.633239	0.11718	2.13444e-07	2.58926e-05	chr4	1004200	-	chr4:1003106-1005455	Island	GCTGGCCCAGACGCGGGATTTGGGGTGGAGGACGCTGGGCTGGGAACCAGCACCTTGGGA[CG]GCCGGGTAGTTCGGGCCTTGAGGAGTCCCACACCCTGACAGCTGGCGCCCCCCACGCCCC	GCGGGATTTGGGGTGGAGGACGCTGGGCTGGGAACCAGCACCTTGGGACG	FGFRL1	NM_001004356	TSS1500				TRUE	4:993057-996478			FGFRL1;FGFRL1;FGFRL1;FGFRL1	ENST00000512562.1;ENST00000398484.2;ENST00000542622.1;ENST00000510644.1	5'UTR;5'UTR;TSS1500;TSS1500	FGFRL1;FGFRL1;FGFRL1;FGFRL1	ENST00000512562.1;ENST00000398484.2;ENST00000542622.1;ENST00000510644.1	5'UTR;5'UTR;TSS1500;TSS1500	NA	TRUE
cg01868607	0.621903	0.838157	2.34729e-05	0.000909976	chr15	65118663	-	chr15:65116013-65116567	S_Shelf	TAACTACCATGGATTAAATTGCCCTTTCCTTTCCTTTTTCCTTCTTAGGGCTCACTCTGT[CG]CCCAGGCTGTAGTGGAGTGCAGTGGCACAATCTCTGCTCACTGCAACCTCTGCCGTGGCG	ATTAAATTGCCCTTTCCTTTCCTTTTTCCTTCTTAGGGCTCACTCTGTCG	PIF1;PIF1;PIF1;PIF1	NM_025049;NM_001286499;NM_001286497;NM_001286496	TSS1500;TSS1500;TSS1500;TSS1500				NA				PIF1;PIF1	ENST00000559239.1;ENST00000333425.6	TSS1500;TSS1500	PIF1;PIF1;PIF1;PIF1	ENST00000560504.1;ENST00000560444.1;ENST00000559239.1;ENST00000268043.4	TSS1500;TSS1500;TSS1500;TSS1500	NA	NA
cg01872912	0.479734	0.803524	3.2314e-06	0.000196886	chr6	161626210	-		OpenSea	GTCAAAACACATCATGATTCTCTGGCACGACTGATCCTAAAATGTGTATCTTCCGCCTCT[CG]TCCACCTGATCTCCCTCCTGGCTGCCCCACCACAGAGAGTGGGCATGCACATCCCACTGA	CATGATTCTCTGGCACGACTGATCCTAAAATGTGTATCTTCCGCCTCTCG	AGPAT4	NM_020133	Body				NA				AGPAT4	ENST00000366906.5	5'UTR	AGPAT4	ENST00000366906.5	5'UTR	NA	NA
cg01874700	0.731228	0.251648	3.10909e-14	2.3005e-10	chr20	34652387	-	chr20:34652454-34653500	N_Shore	TGCAGGGTCAGGTGAGCAGCTGGGGCTCCGGAGGGTCTGGGTCTCTGTCACTTCTTGCTG[CG]TCGCCTTCTGTGAGTCCTTCCCAGCCCCCTAATCATGCCCGCCTGAGCAAGAGGATGAGA	CGCAGCAAGAAGTGACAGAGACCCAGACCCTCCGGAGCCCCAGCTGCTCA							TRUE	20:34115801-34116385	20:34652070-34653574	Promoter_Associated							NA	NA
cg01874783	0.315371	0.581497	1.22206e-06	9.50341e-05	chr11	57413404	-	chr11:57414400-57414664	N_Shore	AGCCAGGTTTCCCCCAGGGGTGGGGCAGTACTCATGCTGGTATAGACTGCTTGGCAGGGC[CG]TGGGGAGGGAGGGGCATGCGGAGGAAGGGCACACCCTGCCTGAGCCCCTCAGTCCCAGCC	CGGCCCTGCCAAGCAGTCTATACCAGCATGAGTACTGCCCCACCCCTGGG	YPEL4	NM_145008	3'UTR				NA				YPEL4;YPEL4;AP000662.4	ENST00000544993.1;ENST00000534711.1;ENST00000530595.1	3'UTR;3'UTR;5'UTR	YPEL4;YPEL4;YPEL4;YPEL4;AP000662.4;YPEL4;AP000662.4;AP000662.4	ENST00000532314.1;ENST00000528797.1;ENST00000544993.1;ENST00000524592.1;ENST00000525988.1;ENST00000534711.1;ENST00000528466.1;ENST00000530595.1	3'UTR;3'UTR;3'UTR;3'UTR;TSS1500;3'UTR;5'UTR;5'UTR	NA	NA
cg01879195	0.70436	0.833245	1.30312e-06	9.96143e-05	chr18	26728044	-		OpenSea	CTCACAGTATGGAGCATTAAAACTACATATCCCAGATTCCTTTGTAGCTGGTGCCCTGCA[CG]TGACCAGGAATTTAGTAGCAGATGCACCAGTGTGGGAACTGGGAAGGGGAAGGTCTTTCA	CGTGCAGGGCACCAGCTACAAAGGAATCTGGGATATGTAGTTTTAATGCT							NA										NA	NA
cg01880677	0.839329	0.696946	5.84885e-06	0.000311016	chr9	82379456	-		OpenSea	AAGGCAGTGAGCTCTGATCTGGCTGGAGTCCCCTGGTACTTCTCCAAGATTCCAATGGAG[CG]TGCTCATTAGGAGTTTTGCTTTTCTTGTTTCTAGGTTCCCCACGTTGGTTGTTGAACTAT	CGCTCCATTGGAATCTTGGAGAAGTACCAGGGGACTCCAGCCAGATCAGA							TRUE										NA	NA
cg01881524	0.572004	0.355612	4.79569e-06	0.000267154	chr5	54179671	+	chr5:54179363-54180171	Island	GCACCGACCGGGAGATGGAAGTTTTTCGCGGCGGCGCCCCAGCCACTTCGCAGGGCCGAG[CG]GTCTCCTCCACCGGCCGCCCGGCTCAGGAATGCCCTGCCTGCGAGTCAAAGTCGGGGTCG	TGACTCGCAGGCAGGGCATTCCTGAGCCGGGCGGCCGGTGGAGGAGACCG						DMR	NA	5:54215121-54215999	5:54179231-54180227	Unclassified_Cell_type_specific							NA	TRUE
cg01881899	0.455362	0.749981	1.39448e-05	0.000607486	chr21	43652704	-	chr21:43654846-43655465	N_Shelf	GCTCCTGTTCTTGAACCATCTGGCCCCTTCAGTGCAACTCTGTAGGACTGTGCTCTGCTC[CG]TGGGGGTTGGTGTCACTGTTTAACTGCTGGAGGATGTTCTTACCACAATCGTTTTCACCT	CGGAGCAGAGCACAGTCCTACAGAGTTGCACTGAAGGGGCCAGATGGTTC	ABCG1;ABCG1;ABCG1;ABCG1;ABCG1;ABCG1	NM_207628;NM_004915;NM_207174;NM_207627;NM_016818;NM_207629	Body;Body;Body;Body;Body;Body				NA		21:43652621-43652767	Unclassified	ABCG1	ENST00000462050.1	5'UTR	ABCG1;TMPRSS3	ENST00000462050.1;ENST00000553129.1	5'UTR;3'UTR	NA	TRUE
cg01882395	0.0822722	0.228174	1.63868e-07	2.14304e-05	chr17	43717810	+		OpenSea	TCTAGTGCATGGCATGGGAAGCCCTCTCTAGGAGGATGCTGTGGCCACACAAGTGCTGGA[CG]AACCGCTGGAGTAGGTGACTTCCAAGGTGTCCTGATGTAGTAGCTATTAGACAAGCTCCT	AATAGCTACTACATCAGGACACCTTGGAAGTCACCTACTCCAGCGGTTCG	C17orf69;C17orf69	NR_026906;NR_026905	Body;Body				NA		17:43717697-43718150	Unclassified_Cell_type_specific	C17orf69;C17orf69;CRHR1;CRHR1	ENST00000300525.4;ENST00000300525.4;ENST00000293493.7;ENST00000339069.5	5'UTR;1stExon;5'UTR;5'UTR	C17orf69;C17orf69;CRHR1;CRHR1	ENST00000300525.4;ENST00000300525.4;ENST00000293493.7;ENST00000339069.5	5'UTR;1stExon;5'UTR;5'UTR	NA	TRUE
cg01883777	0.239352	0.646364	2.36641e-06	0.000155888	chr22	38201848	+	chr22:38203588-38204218	N_Shore	TGTCCTCAAGCAGACCAAAGGGGTGGGGGCCTCGGGGTCCTTCCGGCTAGCCAAGAGCGA[CG]AACCCAAGAAGTCAGTGGCCTTCAAGAAGACCAAGAAGGAAATCAAGAAGGTAGCCACGC	TCTTGATTTCCTTCTTGGTCTTCTTGAAGGCCACTGACTTCTTGGGTTCG	H1F0	NM_005318	1stExon			RDMR	NA		22:38200152-38202041	Unclassified_Cell_type_specific	H1F0	ENST00000340857.2	1stExon	H1F0	ENST00000340857.2	1stExon	NA	TRUE
cg01885071	0.84939	0.479871	1.28254e-07	1.79343e-05	chr14	90168304	+	chr14:90167782-90168352	Island	AGTTGACGGCCTTTTCCCCCTTGGCGTACAAGTATTGAGTCCCGCGCCCTGGGAGGGAGA[CG]GCGCTCAGCAAATTTAGATGAATGCAACGCTTCAACGTGGGCTCTCGACCTCTGGTCCCC	CGGCGCTCAGCAAATTTAGATGAATGCAACGCTTCAACGTGGGCTCTCGA							TRUE	14:89237378-89238061	14:90167257-90168591	Promoter_Associated	RP11-33N16.3	ENST00000555070.1	3'UTR	RP11-33N16.3	ENST00000555070.1	3'UTR	NA	TRUE
cg01892452	0.594081	0.771651	1.50244e-07	2.00808e-05	chr1	86527360	-		OpenSea	AGAACAGCAGTAAACAAAATAAACAAGTAAGACTTCAGCATAATCTTTATATGGCATAAA[CG]TATTCTGAGCCAACCACACCCTAGAATCACTGAGACAACCACAGAAACTCAAAAGAAACT	AACAAAATAAACAAGTAAGACTTCAGCATAATCTTTATATGGCATAAACG	COL24A1	NM_152890	Body		chr1:86527312-86527312		NA										NA	NA
cg01893321	0.586861	0.81335	2.27937e-06	0.000151547	chr1	235256920	+		OpenSea	ATCCGAATGCAAGCAGGGGAGAGGAGGCCCCAGCAGGCTGGATGCTGCTACGGGGAGTGA[CG]GTCACCCCTGTGTGTCCAGAGCCCACTCCACGCCTGGAACGCAGTAAACACTGCATCGAC	CGGTCACCCCTGTGTGTCCAGAGCCCACTCCACGCCTGGAACGCAGTAAA							NA	1:233323361-233323765	1:235256340-235257699	Unclassified							NA	NA
cg01894747	0.227928	0.478246	4.79515e-06	0.000267147	chr5	138290943	+		OpenSea	GTGGCGCTGGTGTGCTCAAAGTCAACAGAAGGATATTAAGGACGTAGCTCATCTCCGATG[CG]ATAAATGAGAATAAACCTTGTTCAGGGCTAAGCCGGCTGGACTAAATAAATACCATTAGC	TATTTAGTCCAGCCGGCTTAGCCCTGAACAAGGTTTATTCTCATTTATCG	SIL1;SIL1	NM_022464;NM_001037633	Body;Body				NA							SIL1	ENST00000503732.1	3'UTR	NA	NA
cg01896085	0.466484	0.706986	4.78999e-07	4.6776e-05	chr2	9279786	+		OpenSea	TATACATATACTAGTATGTATGCGTGTGCATATATAGAGGTATATACATGTGTGTGTACC[CG]TATCTATTTACTAGTATATATGATGTGTGTGTGTACTGGTATGGATGTGTGGGTATGTGC	ACATCCATACCAGTACACACACACATCATATATACTAGTAAATAGATACG							TRUE		2:9278349-9280296	Unclassified							NA	TRUE
cg01897498	0.420618	0.254014	3.71615e-09	1.44848e-06	chr9	95572081	-	chr9:95569429-95572255	Island	TCGGGGGTACCACATCCGGGACTGGGAACTGCGGAAGATCCACAGGGCTGCCATCAAGGG[CG]ACGCCGCGGAGGTGGAGCACTGCCTGACGCGCAGGTTCCGGGACTTGGACGCCCGCGACA	CGCCCTTGATGGCAGCCCTGTGGATCTTCCGCAGTTCCCAGTCCCGGATG	ANKRD19	NR_026868	Body				NA	9:94609251-94612076			ANKRD19P;ANKRD19P	ENST00000473204.1;ENST00000473204.1	1stExon;5'UTR	ANKRD19P;ANKRD19P;ANKRD19P;ANKRD19P;ANKRD19P;ANKRD19P	ENST00000473204.1;ENST00000465736.1;ENST00000460854.1;ENST00000473204.1;ENST00000465736.1;ENST00000460854.1	1stExon;1stExon;1stExon;5'UTR;5'UTR;5'UTR	NA	TRUE
cg01902704	0.563452	0.763552	1.17604e-06	9.23444e-05	chr16	24999103	-		OpenSea	TACAATTTCACATGAGAGATCACTGTTCTGCTGGCTTTTACACTTGCACACTGACTGATA[CG]TCAATTAAAATGAAAAAATGAAGCATGGAGAGAATTTTTAATGAGCTCATTTTCAATGCT	TGAGAGATCACTGTTCTGCTGGCTTTTACACTTGCACACTGACTGATACG	ARHGAP17;ARHGAP17	NM_001006634;NM_018054	Body;Body				TRUE				ARHGAP17	ENST00000575975.1	3'UTR	ARHGAP17;ARHGAP17;ARHGAP17	ENST00000575975.1;ENST00000575447.1;ENST00000573449.1	3'UTR;3'UTR;5'UTR	NA	TRUE
cg01904393	0.434386	0.649364	2.19857e-05	0.000865573	chr12	51815083	+	chr12:51818460-51819166	N_Shelf	TGAGAGCCATGTGTTTGAGCTTTTCCAACCAGGGTAAGGAGCAGTAGATGTTAGGAGCCT[CG]TGCTTAGAGCCAAGTGAACCAGCTTTTTCTGGGAAGGAGAGACCAAATCATCCCTGGGAG	ATTTGGTCTCTCCTTCCCAGAAAAAGCTGGTTCACTTGGCTCTAAGCACG							NA		12:51814494-51816088	Unclassified	SLC4A8	ENST00000535225.1	5'UTR	SLC4A8;SLC4A8	ENST00000535225.1;ENST00000548352.1	5'UTR;5'UTR	NA	TRUE
cg01907945	0.19397	0.806412	2.12313e-15	2.82229e-11	chr3	150726740	+		OpenSea	ATAGCCTCATCATGCTAGAGAGACAAATGCAGTCTTGGGCTATAGTGGTTGAAGCATCCG[CG]TCCAACTCCAGAGAGGGAGTTGTCCCAGTGTTCCCCATGCTGCTCAGCCTATAGACAGAA	GCTGAGCAGCATGGGGAACACTGGGACAACTCCCTCTCTGGAGTTGGACG	CLRN1-AS1	NR_024066	Body				NA		3:150726459-150727350	Unclassified_Cell_type_specific	CLRN1-AS1;RP11-166N6.2;CLRN1-AS1	ENST00000476886.1;ENST00000469268.1;ENST00000465576.1	5'UTR;5'UTR;5'UTR	CLRN1-AS1;RP11-166N6.2;CLRN1-AS1	ENST00000476886.1;ENST00000469268.1;ENST00000465576.1	5'UTR;5'UTR;5'UTR	NA	NA
cg01909531	0.793572	0.571068	7.06396e-07	6.27659e-05	chr12	50580370	-		OpenSea	CCCTCATAAAGGGGTAGTGCCCAGAGCATAGACAACCCCTCATAAAGATGCTTATCCAAT[CG]CTCCAGTGATAAGTTTTGCAAGAAAGTCAAGCGTGACTAGCTGCACATGTTTTATCCTAA	GGTAGTGCCCAGAGCATAGACAACCCCTCATAAAGATGCTTATCCAATCG	LIMA1;LIMA1;LIMA1;LIMA1	NM_001243775;NM_001113547;NM_001113546;NM_016357	Body;Body;Body;Body				NA				RP3-405J10.3	ENST00000552061.1	3'UTR	RP3-405J10.3;LIMA1	ENST00000552061.1;ENST00000552338.1	3'UTR;3'UTR	NA	NA
cg01925633	0.689395	0.861193	2.14186e-07	2.59452e-05	chr1	29338769	+		OpenSea	AAAGATGAGAAAAGAAAAAGGATATGGGAGTCAGTTCTCAAAATGGTAGTGACTTGAAAC[CG]CAGTTGCCTACTAGGAGTTTGCTGCCGTATCCTATTCCTTTGAAATTGTTCTGAACTATT	CGCAGTTGCCTACTAGGAGTTTGCTGCCGTATCCTATTCCTTTGAAATTG	EPB41;EPB41;EPB41;EPB41;EPB41;EPB41	NM_203342;NM_001166006;NM_001166007;NM_203343;NM_004437;NM_001166005	Body;Body;Body;Body;Body;Body				TRUE										NA	TRUE
cg01931766	0.627239	0.877389	4.17522e-07	4.22193e-05	chr12	109062040	-		OpenSea	AAGGCCTGCATGTAGGGCATCAGGGCATTCCCAAATGAACCATGACGTGCAGAGTGGCAC[CG]AGTTCGGGAAAACCAAGAACCGAGTGTTGGGTTCCGATCTGCCAGGGTTATAATATCCTC	CGGTGCCACTCTGCACGTCATGGTTCATTTGGGAATGCCCTGATGCCCTA	CORO1C;CORO1C;CORO1C	NM_014325;NM_001276471;NM_001105237	Body;Body;Body				NA				U7;CORO1C	ENST00000459456.1;ENST00000549384.1	TSS200;3'UTR	U7;CORO1C;CORO1C	ENST00000459456.1;ENST00000547170.1;ENST00000549384.1	TSS200;3'UTR;3'UTR	NA	NA
cg01932124	0.404935	0.70645	3.80555e-07	3.95215e-05	chr18	34885136	-		OpenSea	CAGTGTTATTAAACTAAAGCATCTTATAAAACTCGAGCCATTAATAACAGGCTGCCGCCA[CG]TTGGGGTAATTTATTCAAATTGCGGGTCCGGGATGGAGGAGCAGATGTTTCAGAGCTGCT	CGTGGCGGCAGCCTGTTATTAATGGCTCGAGTTTTATAAGATGCTTTAGT	CELF4;CELF4;CELF4;CELF4	NM_001025088;NM_001025089;NM_020180;NM_001025087	Body;Body;Body;Body				NA										NA	NA
cg01933515	0.198193	0.616645	5.11553e-10	3.41376e-07	chr14	96532698	-		OpenSea	TCTTCCATTATTGCTAATCTAAGATGCTGTGCTCTGATGAGACAGCGTTTTCTCCCCCTG[CG]TTGTGCTGAGTTACTATGGCAACACTTTCAGAAGCGGTGAATTTGCTTTTTCCTCTTAAT	CGCAGGGGGAGAAAACGCTGTCTCATCAGAGCACAGCATCTTAGATTAGC	C14orf132;C14orf132;C14orf132;C14orf132	NM_001289139;NM_001252507;NM_001282464;NM_001282463	Body;Body;Body;Body				NA				C14orf132;C14orf132	ENST00000555004.1;ENST00000556728.1	5'UTR;5'UTR	C14orf132;C14orf132;C14orf132;C14orf132	ENST00000555004.1;ENST00000553764.1;ENST00000556728.1;ENST00000553782.1	5'UTR;5'UTR;5'UTR;5'UTR	NA	NA
cg01936957	0.455472	0.711498	8.55151e-06	0.000416682	chr12	124982370	-		OpenSea	TGCCTAATACTGCTGTCACCAGGACTGTCAATGATGCAGCTGCAGCCCAGTCACCAGTGA[CG]CTATGATGGGGAGGCAAGGCACAGCTAGCCCTGCCCGGCCCCAAGAGCAATGAGACATCC	CTGTCACCAGGACTGTCAATGATGCAGCTGCAGCCCAGTCACCAGTGACG	NCOR2;NCOR2;NCOR2	NM_006312;NM_001077261;NM_001206654	5'UTR;5'UTR;5'UTR		chr12:124982309-124982309		TRUE				NCOR2;NCOR2	ENST00000404621.1;ENST00000404121.2	5'UTR;5'UTR	NCOR2;NCOR2;NCOR2;NCOR2;NCOR2	ENST00000420698.1;ENST00000404621.1;ENST00000404121.2;ENST00000542565.1;ENST00000458234.1	5'UTR;5'UTR;5'UTR;3'UTR;5'UTR	NA	NA
cg01939453	0.247838	0.0476971	6.98754e-06	0.000356939	chr6	166077483	-	chr6:166073882-166077752	Island	GCCAGAAGTTTGGGGAAGTTGGAGCGCAAGAGCGCACACAGATGCACAGGTGTCCGCGTT[CG]GGCAGGCACGCGCGGCGGGGCCACCATGGCGCGCTGGGTCCGAGGAGGGGCGGTGGCTGT	GGGAAGTTGGAGCGCAAGAGCGCACACAGATGCACAGGTGTCCGCGTTCG						DMR	NA	6:165993888-165998209									NA	TRUE
cg01939843	0.385758	0.682437	3.97687e-10	2.85983e-07	chr3	193398151	+		OpenSea	CACTGAAGGTCTTTTGACAAACCAATATTTATAACAGTTTGACAGCAGGATGAGGAACAG[CG]TTTGTCTTTGTAACAGCTTGAAGAAAGACCCTTTCCAGGACCCAGTCATGCAGTTACAAT	TGACTGGGTCCTGGAAAGGGTCTTTCTTCAAGCTGTTACAAAGACAAACG	OPA1;OPA1;OPA1;OPA1;OPA1;OPA1;OPA1;OPA1	NM_130831;NM_130837;NM_130836;NM_130835;NM_130834;NM_130833;NM_130832;NM_015560	Body;Body;Body;Body;Body;Body;Body;Body				TRUE										NA	NA
cg01940425	0.4803	0.0722087	1.96855e-07	2.44848e-05	chr2	63276565	-	chr2:63274475-63279430	Island	ACAGTGTGCCCTCCATCATATTCTGTTACCGTATTTTATTCGGACTCCAAAGGAAAGTGT[CG]CTTGGGGGAGGGGGAAGCACTTTGATGAGCGGCGGCCGCGGCCCCTTTTCACTCAGCGGG	CCATCATATTCTGTTACCGTATTTTATTCGGACTCCAAAGGAAAGTGTCG	OTX1	NM_014562	TSS1500				TRUE	2:63130069-63130291			OTX1;AC009501.4;AC009501.4;OTX1	ENST00000366671.3;ENST00000413549.1;ENST00000437346.1;ENST00000282549.2	TSS1500;TSS1500;TSS1500;TSS1500	OTX1;AC009501.4;AC009501.4;OTX1;OTX1;OTX1;OTX1;OTX1	ENST00000366671.3;ENST00000413549.1;ENST00000437346.1;ENST00000484066.2;ENST00000282549.2;ENST00000477348.1;ENST00000405984.4;ENST00000476383.1	TSS1500;TSS1500;TSS1500;TSS1500;TSS1500;TSS1500;TSS1500;TSS1500	NA	TRUE
cg01941219	0.703271	0.525048	1.37389e-05	0.000600825	chr13	98795021	+	chr13:98794398-98796241	Island	CAGAGTCCGAGCCCCTGACCGCCCGCCTGCCGCTCCCGGCTTCGCCGTGCACACGTCTCC[CG]CTCTCCCCGGTTCGTTTTTCGCCACAGCTGCTGGATTCGCGTCTCGCCAGTGGCGCTCCC	GGCGAGACGCGAATCCAGCAGCTGTGGCGAAAAACGAACCGGGGAGAGCG	FARP1;FARP1	NM_005766;NM_001001715	TSS1500;TSS1500				NA	13:97592434-97594242			FARP1;FARP1	ENST00000376581.4;ENST00000319562.6	TSS1500;TSS1500	FARP1;FARP1	ENST00000376581.4;ENST00000319562.6	TSS1500;TSS1500	NA	TRUE
cg01944751	0.496149	0.382773	2.88369e-07	3.21927e-05	chr10	88714310	-		OpenSea	GGGGAGGGCGCATCCATTATGCAGATTGTGTGGAGTGCCTTCCCTTCCCCAGCCAGGAAA[CG]CCCTCCCAGGGGCCCTCAAGTCTTCCTTGGGAAGGAAGGCGTGTTCTCAGCAGCCTTGTT	TCCATTATGCAGATTGTGTGGAGTGCCTTCCCTTCCCCAGCCAGGAAACG	MMRN2	NM_024756	Body		chr10:88713984-88713984		NA				MMRN2	ENST00000474994.1	3'UTR	MMRN2	ENST00000474994.1	3'UTR	NA	NA
cg01945562	0.203261	0.0528817	2.98048e-06	0.000185302	chr3	145879277	+	chr3:145878430-145879287	Island	TTAGCTTTGGGAGTGGGTTTGGGAGAGGGAGGAGGAGCCGCCGGGAGTCTGGCGGGAGGG[CG]GTGTTCCCGTCTGGGTTCCTCTCTGCTGTCCCAGCCCCGGTAGCTTCCACAGCAGCCTCG	GGAAGCTACCGGGGCTGGGACAGCAGAGAGGAACCCAGACGGGAACACCG	PLOD2;PLOD2;PLOD2;PLOD2	NM_000935;NM_182943;NM_000935;NM_182943	5'UTR;1stExon;1stExon;5'UTR			RDMR	NA	3:147361121-147362150			PLOD2;PLOD2	ENST00000494950.1;ENST00000282903.5	TSS1500;TSS1500	PLOD2;PLOD2;PLOD2	ENST00000480704.1;ENST00000494950.1;ENST00000282903.5	TSS1500;TSS1500;TSS1500	NA	TRUE
cg01946966	0.589238	0.702662	5.37123e-07	5.09471e-05	chr1	51697969	-	chr1:51701767-51702542	N_Shelf	TAAGTGATAGATACAATTTTATTCTGGTAGTTTTATTCATTATTATCAAGACCACATGGC[CG]GGCATGGTGGCTCATGCCTGAAATCCCTGAACTTTGGGAGGCCAAGGCAGGTGGATCATT	ACAATTTTATTCTGGTAGTTTTATTCATTATTATCAAGACCACATGGCCG							NA				snoU13;RP11-296A18.3	ENST00000459356.1;ENST00000366181.2	TSS1500;3'UTR	snoU13;RP11-296A18.3	ENST00000459356.1;ENST00000366181.2	TSS1500;3'UTR	NA	TRUE
cg01947949	0.719603	0.448263	1.84594e-09	8.5848e-07	chr4	1004445	-	chr4:1003106-1005455	Island	AGGAGGTGCTGGGATGGTGACTCCGCGGAGTCGAGGGTGTGAGGCGGGATGTGGGCAGGC[CG]TGAGGTTTGTGTTGCAAGACTGGGAGGCAGGATGAGGGGAGGCCATGGGGCGGCTGGAGG	CGGCCTGCCCACATCCCGCCTCACACCCTCGACTCCGCGGAGTCACCATC	FGFRL1;FGFRL1	NM_001004358;NM_001004356	TSS1500;TSS1500				TRUE	4:993057-996478			FGFRL1;FGFRL1;FGFRL1;FGFRL1;FGFRL1	ENST00000512562.1;ENST00000398484.2;ENST00000542622.1;ENST00000510644.1;ENST00000504138.1	5'UTR;5'UTR;TSS1500;TSS1500;TSS1500	FGFRL1;FGFRL1;FGFRL1;FGFRL1;FGFRL1;FGFRL1;FGFRL1	ENST00000512562.1;ENST00000398484.2;ENST00000542622.1;ENST00000510644.1;ENST00000504138.1;ENST00000512174.1;ENST00000507339.1	5'UTR;5'UTR;TSS1500;TSS1500;TSS1500;TSS1500;TSS1500	NA	TRUE
cg01950369	0.67419	0.805738	1.07379e-05	0.000496092	chr17	40054986	-		OpenSea	GGCCGCTGTGGGTGGCTGGTTGGGGATGGGCCGGTGGCCCAGGGCCATGCCCACAATGGC[CG]TCATGTGAGTCTCTGTGCCAAAGACATGGATGGGGATCCCAGTGGTCTTCCCTGCAAGGG	CGGCCATTGTGGGCATGGCCCTGGGCCACCGGCCCATCCCCAACCAGCCA	ACLY;ACLY;ACLY;ACLY	NM_001096;NM_198830;NM_001303275;NM_001303274	Body;Body;Body;Body				NA										NA	NA
cg01952088	0.257144	0.0853976	3.47708e-07	3.69954e-05	chr5	40679966	+	chr5:40679502-40682081	Island	GCCCAGGGAGGACGCGCTCCGCCCCCTTCCAATCCGGCCAATGGGCGCCCGGGCAGCGCG[CG]GTTTGCCTCCGCCTCCGCCAGGGAAACTTGGAGGAGGAGAAAAGTTTGTACAGAGGGTGG	CAAACTTTTCTCCTCCTCCAAGTTTCCCTGGCGGAGGCGGAGGCAAACCG	PTGER4	NM_000958	TSS200				NA	5:40714914-40716402	5:40679885-40680291	Promoter_Associated_Cell_type_specific	PTGER4;PTGER4;PTGER4	ENST00000302472.3;ENST00000302472.3;ENST00000514343.1	1stExon;5'UTR;TSS200	PTGER4;PTGER4;PTGER4	ENST00000302472.3;ENST00000302472.3;ENST00000514343.1	1stExon;5'UTR;TSS200	NA	TRUE
cg01954305	0.593648	0.834669	4.18919e-06	0.000241615	chr8	135817117	+		OpenSea	TATAGCCTCCTCAACTCCACTCCGGGACAGAATTATATCAAGAGGATGTCTGTGAATAGC[CG]GTAGCAGCAAACATCTGACTGAAAGCTTAGCTGTGTCTTACAGCTTCCAGTCGGGGATGT	GGAAGCTGTAAGACACAGCTAAGCTTTCAGTCAGATGTTTGCTGCTACCG							TRUE										NA	TRUE
cg01955313	0.723809	0.82874	1.6119e-07	2.11365e-05	chr1	110138520	-		OpenSea	AAAAAATAAGCAACCCTCTACTCATTTGTATAAACCTAAAACGTCACTGTTTTCCTTGAG[CG]TTAGTACTTGTGGGTTCTTTCCTTTTCATGTGTAATACTGATTTTAAGAGCAATGATCTT	CGCTCAAGGAAAACAGTGACGTTTTAGGTTTATACAAATGAGTAGAGGGT							TRUE				RP5-1160K1.3	ENST00000436416.1	TSS1500	RP5-1160K1.3	ENST00000436416.1	TSS1500	NA	NA
cg01955946	0.690752	0.800555	6.26611e-08	1.06025e-05	chr1	68920769	+		OpenSea	GACTGTCAAACTAGTCTCCAGGACTAGGGGAGAAATTGCTGAGTGGAAATGGGTATATTA[CG]AATTCTCAGTTAAACGTGAGATGTGAGAAGCCTGTAAGACATTCATCTTCTCCAAGACAC	CGAATTCTCAGTTAAACGTGAGATGTGAGAAGCCTGTAAGACATTCATCT							NA										NA	NA
cg01956293	0.311887	0.695086	4.04525e-11	5.29048e-08	chr2	145212605	-		OpenSea	TCATTTGGTCCACATATGACTAGGGAGCCGATTTCATTTCCTGTAAAAAACCCCCTCAAA[CG]CTGCAAAGTTACCTGACTCAGCTGCTTGTAGAAATCAAATTCAGTCAGAGATAACAGCTA	CATATGACTAGGGAGCCGATTTCATTTCCTGTAAAAAACCCCCTCAAACG	ZEB2;ZEB2	NM_001171653;NM_014795	Body;Body		chr2:145212298-145212298		NA							ZEB2;ZEB2;ZEB2;ZEB2;ZEB2;ZEB2;ZEB2;ZEB2;ZEB2	ENST00000431672.2;ENST00000472146.1;ENST00000465308.1;ENST00000461784.1;ENST00000560384.1;ENST00000476394.1;ENST00000434448.1;ENST00000479735.1;ENST00000453352.1	3'UTR;3'UTR;3'UTR;3'UTR;3'UTR;3'UTR;3'UTR;3'UTR;3'UTR	NA	NA
cg01959838	0.296734	0.473306	1.10127e-05	0.00050582	chr1	108292913	-		OpenSea	TTTAATTGGCCACCTAAAAACCCAAACTGAATGGTATATGAGCCAAGTGTAAACTGAAAA[CG]TTATGGTGAAATTTCCATGTTAATATTTCTTTTTTCTTATTAAGAACAACGTAACTTGGG	CCTAAAAACCCAAACTGAATGGTATATGAGCCAAGTGTAAACTGAAAACG	VAV3	NM_006113	Body				TRUE				VAV3	ENST00000343258.4	3'UTR	VAV3;VAV3;VAV3	ENST00000529809.1;ENST00000343258.4;ENST00000469325.1	TSS1500;3'UTR;3'UTR	NA	TRUE
cg01962918	0.200996	0.0528251	8.59141e-07	7.26177e-05	chr7	116139705	-	chr7:116139774-116140352	N_Shore	GCGCCGGGGCGGGGCTCGGGACGGCCGGGCTGGGAGCTGGAGCCCACAGCGGGAAGCGGC[CG]CCGCCCGGGCCTCGCAGGGCTAGGCGAGGCGAGGGGGGGCGGGGCCGGGCGCTACGGGAA	GGCTCGGGACGGCCGGGCTGGGAGCTGGAGCCCACAGCGGGAAGCGGCCG	CAV2;CAV2;CAV2;CAV2	NM_001233;NM_198212;NM_001233;NM_198212	5'UTR;5'UTR;1stExon;1stExon	high-CpG:115926855-115927042			NA	7:115926610-115927830			CAV2;CAV2;AC002066.1;CAV2;AC002066.1;CAV2;CAV2	ENST00000222693.4;ENST00000222693.4;ENST00000446355.1;ENST00000343213.2;ENST00000413968.1;ENST00000393480.2;ENST00000462876.1	5'UTR;1stExon;TSS200;TSS200;TSS200;TSS200;5'UTR	CAV2;CAV2;CAV2;AC002066.1;CAV2;AC002066.1;CAV2;CAV2;CAV2;CAV2;CAV2;CAV2;CAV2;CAV2;CAV2;CAV2;CAV2	ENST00000495841.1;ENST00000222693.4;ENST00000222693.4;ENST00000446355.1;ENST00000343213.2;ENST00000413968.1;ENST00000393480.2;ENST00000477018.1;ENST00000484156.1;ENST00000467035.1;ENST00000495046.1;ENST00000497046.1;ENST00000491643.1;ENST00000498493.1;ENST00000478226.1;ENST00000462876.1;ENST00000476156.1	TSS1500;5'UTR;1stExon;TSS200;TSS200;TSS200;TSS200;5'UTR;5'UTR;5'UTR;5'UTR;5'UTR;5'UTR;5'UTR;5'UTR;5'UTR;5'UTR	NA	TRUE
cg01965380	0.577749	0.769084	2.6481e-07	3.02808e-05	chr1	90321064	-		OpenSea	AAGCAGGTGATAGGACACTCCTTTGTAAATTAAGCCTCTAATCTTTCTTTATGCTCATGC[CG]ATTTGAGAGAAACCTGGGAATTTCCTTTTCCCCCATTAAGCTATTACACAACTTAATGCT	CGGCATGAGCATAAAGAAAGATTAGAGGCTTAATTTACAAAGGAGTGTCC	LRRC8D;LRRC8D	NM_018103;NM_001134479	5'UTR;5'UTR				TRUE				LRRC8D;LRRC8D	ENST00000337338.5;ENST00000394593.3	5'UTR;5'UTR	LRRC8D;LRRC8C;LRRC8D;LRRC8D;LRRC8D;LRRC8D;LRRC8D;LRRC8D	ENST00000527156.1;ENST00000370453.5;ENST00000441269.2;ENST00000525774.1;ENST00000337338.5;ENST00000394593.3;ENST00000532201.1;ENST00000414841.1	5'UTR;3'UTR;5'UTR;5'UTR;5'UTR;5'UTR;5'UTR;5'UTR	NA	TRUE
cg01966277	0.262127	0.723526	1.57666e-08	3.90954e-06	chr7	82435009	+		OpenSea	TGCCTTACTCATGATGCTGAGTAAGCTTTGTAGTAACAAAAAGAGACCCACTTACATCCT[CG]GAATAGGAAATAGATTAGTCTCCCCTGCAGTGCTGCTGCTTCCTTCACTGTCCACGCTAT	CGGAATAGGAAATAGATTAGTCTCCCCTGCAGTGCTGCTGCTTCCTTCAC	PCLO	NM_033026	Body				TRUE				PCLO;PCLO	ENST00000431819.1;ENST00000431819.1	ExonBnd;3'UTR	PCLO;PCLO;PCLO	ENST00000431819.1;ENST00000431819.1;ENST00000432078.2	ExonBnd;3'UTR;3'UTR	NA	TRUE
cg01968694	0.681734	0.791955	3.58187e-07	3.77874e-05	chr19	34724494	-		OpenSea	TTCTCTTTTGGGGTTAGCTGGGTGACAGTTCTCCCTTGCTGGATTCCCAGTACTTAATAG[CG]TTTCTTTGACTCAGTGGATATGTGGAACATTGCAGACTGCAATTTATAACACAGAACTGG	CGCTATTAAGTACTGGGAATCCAGCAAGGGAGAACTGTCACCCAGCTAAC							TRUE										NA	NA
cg01972751	0.332547	0.148906	2.34773e-06	0.000155025	chr6	137814728	-	chr6:137814355-137815202	Island	AGTGGGGAGGCCGGATGGTGCCGATGGCGGGAAGTGAGGCGGCGGACAGCGGTGACGAGG[CG]TTGCCAGATGAGAGCGCGCCGCCCAAGATGGGGTGCACCGGGTGCACGGAGTTGGCCGCG	CGCCTCGTCACCGCTGTCCGCCGCCTCACTTCCCGCCATCGGCACCATCC	OLIG3	NM_175747	1stExon				TRUE	6:137855946-137857018	6:137813717-137815086	Unclassified_Cell_type_specific	OLIG3	ENST00000367734.2	1stExon	OLIG3	ENST00000367734.2	1stExon	NA	TRUE
cg01977433	0.333322	0.514558	1.48011e-05	0.000636609	chr5	74977045	-		OpenSea	GTTAAGAGTAAGAGGTCTAAATCAGATTTTCAAAGTCTGAATTCCAAATCAGTTACTAAT[CG]TGTCCTTAGGCAAGTTGCATACTCTCTAAGCCTCAATTTCTTCATTTATAAAATGGAGAA	AGGTCTAAATCAGATTTTCAAAGTCTGAATTCCAAATCAGTTACTAATCG	POC5;POC5	NM_152408;NM_001099271	Body;Body				NA							POC5	ENST00000503521.2	3'UTR	NA	NA
cg01982170	0.494697	0.644009	1.7868e-05	0.000735929	chr3	40301346	+		OpenSea	CAAAGCAAAACAAACAAACAAAAACAAATTTTAAGAACACAACAAAAAAGATTTGACTTC[CG]AATAGAATGTTTTCTTTAAGAGGCATGAAAAGCAACTATTGTTGTGTTACAGTGTTAAAA	AACACAACAATAGTTGCTTTTCATGCCTCTTAAAGAAAACATTCTATTCG	MYRIP	NM_015460	3'UTR				NA				MYRIP;MYRIP	ENST00000302541.6;ENST00000459828.1	3'UTR;5'UTR	MYRIP;MYRIP	ENST00000302541.6;ENST00000459828.1	3'UTR;5'UTR	NA	TRUE
cg01992604	0.187924	0.411614	2.75561e-07	3.11584e-05	chr2	109213819	-		OpenSea	GCATAGAAAGTTTTTGTATAACTTCCAGGAATTCATGCCCCCAGTGCAGCCACAGCAACA[CG]TGATTGTAATGATGATTGCATTTCTGAAGACTTTTTAAAAGCATTTTTTTGGATAGAAGA	CGTGTTGCTGTGGCTGCACTGGGGGCATGAATTCCTGGAAGTTATACAAA	LIMS1;LIMS1;LIMS1	NM_004987;NM_001193488;NM_001193483	5'UTR;5'UTR;Body				NA				LIMS1;LIMS1	ENST00000332345.6;ENST00000393310.1	5'UTR;5'UTR	LIMS1;LIMS1	ENST00000332345.6;ENST00000393310.1	5'UTR;5'UTR	NA	NA
cg01995660	0.60657	0.313565	3.42765e-08	6.90582e-06	chr13	41238844	-	chr13:41238500-41241750	Island	CCCTCAGGGCAGCCTCTGTGTTTCTAACTAAAAGCCTCCTACCAGGGGCAAGACCAAGTT[CG]GGCGCTTCCCCGCATGGAGAAACGCTGGCCCCACGGCGCCCGGCCCCGACGCGCTGGCCC	CCTCTGTGTTTCTAACTAAAAGCCTCCTACCAGGGGCAAGACCAAGTTCG	FOXO1	NM_002015	Body				NA	13:40136501-40138924									NA	TRUE
cg01996357	0.457638	0.591408	2.3533e-07	2.77708e-05	chr1	114942365	+		OpenSea	TATTAATTTTAGGGAAAAAAATTATTATAGAGCCAGCTGCTTGCAAATTTTGAGTATAGA[CG]TATGTACTTTACATCTTCATGAAAACCAAATCTTATGTGGCATATGTGCCAATCTTCATG	CACATATGCCACATAAGATTTGGTTTTCATGAAGATGTAAAGTACATACG	TRIM33;TRIM33	NM_033020;NM_015906	Body;Body				NA							TRIM33	ENST00000478032.1	TSS200	NA	NA
cg01997121	0.188476	0.509235	7.1398e-08	1.16812e-05	chr20	25379639	+		OpenSea	ATCTGTAGGAGCAGCCAAAAGAATATCATCCATAAAATGAATGATGTAAGCAGTAGGAAA[CG]TATTCCGAGGCTCTAATGCCTGCCCTACGAAAGGCTGACATAGCATAGGACTGTTAAGCA	CTATGCTATGTCAGCCTTTCGTAGGGCAGGCATTAGAGCCTCGGAATACG							NA										NA	NA
cg02005162	0.478206	0.648773	1.53093e-05	0.000653577	chr4	141852934	+		OpenSea	GTTTTCTTTCCTCATTCACCAAAGGGAAGCAAACATTTTAAAAATAGTTCTTCAAACACC[CG]AAAACAGAGGATGCAGACAACTGCATAATGATGCAGAGATGATGATGAATAATAAGTTCT	TCATCATCATCTCTGCATCATTATGCAGTTGTCTGCATCCTCTGTTTTCG	RNF150	NM_020724	Body				NA										NA	NA
cg02006119	0.572491	0.367092	2.13383e-05	0.000845567	chr18	13302729	+		OpenSea	AACGCCTTGCTAGCTCTGCAACTACAGAGGGAAAGGAGGAAAACATGCACTGCTGTTACA[CG]CAGTTATGGTACATGCAGTTGTTATGTTTATGCAGTTATGGTACATGCAGTTACTGTTAC	CGCAGTTATGGTACATGCAGTTGTTATGTTTATGCAGTTATGGTACATGC	LDLRAD4;LDLRAD4	NM_181482;NM_181481	5'UTR;5'UTR				NA				C18orf1	ENST00000399848.2	5'UTR	C18orf1	ENST00000399848.2	5'UTR	NA	NA
cg02008423	0.750953	0.576747	2.3238e-05	0.000902955	chr3	184445561	-		OpenSea	CAGAGGGCAGCCAGACTCCCTGCCCTAGGCAAGGCAGTCTTGTATGATGAAGATTTCTCC[CG]CACGTCTCCTGACATTTGAATGCCCCACCAGATACTCATGTAGGTAGAAAACCTCTTCAT	CGGGAGAAATCTTCATCATACAAGACTGCCTTGCCTAGGGCAGGGAGTCT							NA		3:184445219-184445620	Unclassified_Cell_type_specific							NA	NA
cg02011054	0.277985	0.0273734	6.40972e-08	1.07769e-05	chr11	2950754	+	chr11:2949788-2951756	Island	GCCCCGCCCCTCCCCGCCCCGCCCCGGCCCTCGGGCCACCCCGCCCGCCTGAGCCCCGCG[CG]CCCCGGGCCATACCCTCCCCAAGCCCAGCCGTCCGGGCCCGCACCGTCGCGTCCGCGCTC	CGCCCCGGGCCATACCCTCCCCAAGCCCAGCCGTCCGGGCCCGCACCGTC	PHLDA2	NM_003311	TSS200				NA	11:2906369-2908332			PHLDA2	ENST00000314222.4	TSS200	PHLDA2	ENST00000314222.4	TSS200	NA	TRUE
cg02016305	0.37512	0.202405	6.8086e-09	2.18309e-06	chr16	85368682	-		OpenSea	TCCTTCAGCTCGGATGCTATCTGTACAAGCGACAGTCACCTGACCCTTGTTTGAGTTTCC[CG]TGCGGTGGGACTCCCGTGCCTGCGCATGTAATTAAACATGGTTTTTCTCCTGTTAATCGC	CGGGAAACTCAAACAAGGGTCAGGTGACTGTCGCTTGTACAGATAGCATC					chr16:85368480-85368480		TRUE		16:85368216-85369349	Unclassified_Cell_type_specific							NA	NA
cg02017041	0.652118	0.367034	2.98627e-06	0.000185535	chr19	35521054	-	chr19:35521162-35522051	N_Shore	GGAGATAACTTGGAGGTTCGCCCTCTGGAACTCCTGAGGATGACCTCCATCATTTGAAGT[CG]GAAACCCGGCCCCCAAACTGCGCTCTAAGTCCTCCTGTGACTCTGGGGGTGACCTTTCCA	GAGGTTCGCCCTCTGGAACTCCTGAGGATGACCTCCATCATTTGAAGTCG	SCN1B;SCN1B	NM_001037;NM_199037	TSS1500;TSS1500				NA				SCN1B	ENST00000415950.2	TSS1500	SCN1B	ENST00000415950.2	TSS1500	TRUE	TRUE
cg02018902	0.494651	0.0858351	3.06272e-08	6.34283e-06	chr15	79576149	+	chr15:79576059-79576270	Island	GCCCCGGAGTTCAGCACCTCGGACAGAGCCCGAGCCCCGCCGCCCGAGGCGCACAGTGAG[CG]TGGAACAGCCCGGCTCCCTAGCCCCCGGCCAACGCTGCTCTCAGTTCAGGGCAGCTACGT	TGAACTGAGAGCAGCGTTGGCCGGGGGCTAGGGAGCCGGGCTGTTCCACG	ANKRD34C	NM_001146341	5'UTR			RDMR	NA	15:77363046-77363443	15:79576126-79576191	Unclassified_Cell_type_specific	RP11-17L5.4;RP11-17L5.4;RP11-17L5.4;RP11-17L5.4;RP11-17L5.4;RP11-17L5.4;RP11-17L5.4;ANKRD34C;RP11-17L5.4;RP11-17L5.4;RP11-17L5.4;RP11-17L5.4;RP11-17L5.4;RP11-17L5.4;RP11-17L5.4;RP11-17L5.4	ENST00000560452.1;ENST00000560872.1;ENST00000560732.1;ENST00000559979.1;ENST00000560533.1;ENST00000559225.1;ENST00000557790.1;ENST00000421388.2;ENST00000560872.1;ENST00000559225.1;ENST00000560533.1;ENST00000560732.1;ENST00000559979.1;ENST00000560452.1;ENST00000557790.1;ENST00000558297.1	1stExon;1stExon;1stExon;1stExon;1stExon;1stExon;1stExon;5'UTR;3'UTR;3'UTR;3'UTR;3'UTR;3'UTR;3'UTR;3'UTR;3'UTR	RP11-17L5.4;RP11-17L5.4;RP11-17L5.4;RP11-17L5.4;RP11-17L5.4;RP11-17L5.4;RP11-17L5.4;ANKRD34C;RP11-17L5.4;RP11-17L5.4;RP11-17L5.4;RP11-17L5.4;RP11-17L5.4;RP11-17L5.4;RP11-17L5.4;RP11-17L5.4	ENST00000560452.1;ENST00000560872.1;ENST00000560732.1;ENST00000559979.1;ENST00000560533.1;ENST00000559225.1;ENST00000557790.1;ENST00000421388.2;ENST00000560872.1;ENST00000559225.1;ENST00000560533.1;ENST00000560732.1;ENST00000559979.1;ENST00000560452.1;ENST00000557790.1;ENST00000558297.1	1stExon;1stExon;1stExon;1stExon;1stExon;1stExon;1stExon;5'UTR;3'UTR;3'UTR;3'UTR;3'UTR;3'UTR;3'UTR;3'UTR;3'UTR	NA	TRUE
[truncated: 9,785 more rows]
