# Supplementary material for: Single-nucleus chromatin accessibility reveals intratumoral epigenetic heterogeneity in IDH1 mutant gliomas
Source: Acta Neuropathol Commun. 2019 Dec 5;7:201. doi: 10.1186/s40478-019-0851-y (PMC6896263; doi:10.1186/s40478-019-0851-y)
Supplement: Supplementary file 7 — Additional file 7: Table S6. Genes correlating with CYTOR in the CGGA cohorts. [file 40478_2019_851_MOESM7_ESM.xlsx]

## Sheet: Sheet1
Table S6 - Genes correlating with CYTOR in the CGGA cohorts
LINC00152
MIR4435-1HG
LGALS1
SERPINH1
CLIC1
PLEK2
TMSB10
TIMP1
LAMB1
TNFRSF12A
PHLDA2
DNAJB11
ECM1
LRRC32
AC124789.1
ZYX
RP11-680A11.5
S100A11
FKBP11
PPIB
PFN1
AC017002.1
CD151
IKBIP
UACA
PRKCDBP
NOX4
CD63
GDF15
TMED9
MMP9
HEXB
MRC2
RGS3
C1orf54
KDELR3
MSMP
PTGIR
SEMA3F
P4HB
KDELR2
FAM101B
PLOD1
PCOLCE
CDKN3
TAGLN2
HSPG2
OLFML3
MYO1B
TMEM255B
PPP1CA
ITGA5
C19orf69
ARHGDIB
LEPRE1
PPP1R18
FCN3
MAP2K3
C19orf10
LAMC3
IFNGR2
EVA1B
CCL26
ENG
CD248
RBPMS
SNRPB
MYL12A
MYL12B
STC1
GPR4
COL5A2
PROCR
CD40
IBSP
OR51E1
EXOC3L1
LOX
MAP3K7CL
MYL6
EMILIN1
EDEM2
GRAP
LTBR
RP11-344E13.3
HTRA3
ESM1
CNIH4
RP11-322E11.5
CHPF2
ABRACL
PMEPA1
TRPV2
NDUFA4L2
PDLIM1
NTAN1
TNFAIP8L1
GNG11
PVRL2
FOXS1
AC109642.1
