# Supplementary material for: Single-nucleus chromatin accessibility reveals intratumoral epigenetic heterogeneity in IDH1 mutant gliomas
Source: Acta Neuropathol Commun. 2019 Dec 5;7:201. doi: 10.1186/s40478-019-0851-y (PMC6896263; doi:10.1186/s40478-019-0851-y)
Supplement: Supplementary file 8 — Additional file 8: Table S7. Overrepresented gene sets in the 101 genes correlating with CYTOR. [file 40478_2019_851_MOESM8_ESM.xlsx]

## Sheet: Sheet1
Table S7 - Overrepresented gene sets in the 101 genes correlating with CYTOR
Gene Set	Description	Size	Expect	Ratio	P Value	FDR	-LOG10(FDR)
R-HSA-1474244	Extracellular matrix organization	301	1.3499	11.853	2.9587e-13	1.4146e-09	8.84937
R-HSA-1474290	Collagen formation	90	0.40361	22.299	2.4333e-10	5.8168e-07	6.23532
GO:0043062	extracellular structure organization	400	1.7938	7.8046	2.5467e-09	4.0586e-06	5.39162
GO:0050839	cell adhesion molecule binding	478	2.1436	6.0645	1.915e-07	0.00022889	3.64037
R-HSA-1650814	Collagen biosynthesis and modifying enzymes	67	0.30047	19.969	5.3965e-07	0.00051601	3.28734
hsa04510	Focal adhesion	199	0.89243	8.9643	3.0374e-06	0.0024203	2.61613
GO:0032963	collagen metabolic process	97	0.435	13.793	4.8029e-06	0.0032804	2.48407
R-HSA-2022090	Assembly of collagen fibrils and other multimeric structures	61	0.27356	18.278	7.811e-06	0.0046681	2.33086
GO:0071559	response to transforming growth factor beta	238	1.0673	7.4954	1.1314e-05	0.0059364	2.22648
GO:0005518	collagen binding	67	0.30047	16.641	1.2417e-05	0.0059364	2.22648
GO:0005178	integrin binding	127	0.56954	10.535	2.2586e-05	0.0098165	2.00804
hsa04512	ECM-receptor interaction	82	0.36773	13.597	3.3287e-05	0.013262	1.87739
GO:0001667	ameboidal-type cell migration	381	1.7086	5.2674	5.1235e-05	0.018843	1.72485
R-HSA-5676594	TNF receptor superfamily (TNFSF) members mediating non-canonical NF-kB pathway	18	0.080722	37.165	6.7509e-05	0.021224	1.67317
GO:2000147	positive regulation of cell motility	493	2.2109	4.5231	6.9051e-05	0.021224	1.67317
GO:0005201	extracellular matrix structural constituent	158	0.70856	8.4679	7.6826e-05	0.021224	1.67317
GO:1901342	regulation of vasculature development	313	1.4037	5.6994	7.9561e-05	0.021224	1.67317
GO:0098641	cadherin binding involved in cell-cell adhesion	19	0.085207	35.209	7.9908e-05	0.021224	1.67317
R-HSA-5625900	RHO GTPases activate CIT	20	0.089691	33.448	9.3706e-05	0.0224	1.64975
R-HSA-5627117	RHO GTPases Activate ROCKs	20	0.089691	33.448	9.3706e-05	0.0224	1.64975
R-HSA-416572	Sema4D induced cell migration and growth-cone collapse	21	0.094176	31.855	0.00010897	0.023923	1.62118
GO:0007178	transmembrane receptor protein serine/threonine kinase signaling pathway	328	1.4709	5.4387	0.00011008	0.023923	1.62118
GO:0098631	cell adhesion mediator activity	59	0.26459	15.118	0.0001415	0.028187	1.54995
R-HSA-3000171	Non-integrin membrane-ECM interactions	59	0.26459	15.118	0.0001415	0.028187	1.54995
hsa05145	Toxoplasmosis	113	0.50675	9.8667	0.00015367	0.029388	1.53183
R-HSA-5627123	RHO GTPases activate PAKs	24	0.10763	27.873	0.00016423	0.0302	1.51999
R-HSA-400685	Sema4D in semaphorin signaling	25	0.11211	26.759	0.00018603	0.03294	1.48228
GO:0046923	ER retention sequence binding	5	0.022423	89.195	0.00019688	0.033617	1.47344
GO:0044877	protein-containing complex binding	1062	4.7626	2.9396	0.000243	0.040061	1.39728
R-HSA-114608	Platelet degranulation	129	0.57851	8.6429	0.00028497	0.04515	1.34534
R-HSA-3000157	Laminin interactions	30	0.13454	22.299	0.00032311	0.04515	1.34534
R-HSA-8874081	MET activates PTK2 signaling	30	0.13454	22.299	0.00032311	0.04515	1.34534
R-HSA-3928663	EPHA-mediated growth cone collapse	30	0.13454	22.299	0.00032311	0.04515	1.34534
GO:0001525	angiogenesis	487	2.184	4.1209	0.00032521	0.04515	1.34534
R-HSA-76005	Response to elevated platelet cytosolic Ca2+	134	0.60093	8.3204	0.0003397	0.04515	1.34534
GO:0007492	endoderm development	74	0.33186	12.053	0.00033997	0.04515	1.34534
R-HSA-3000178	ECM proteoglycans	76	0.34083	11.736	0.00037651	0.048652	1.3129
